# Supplementary material for: Genome-wide R-loop analysis defines unique roles for DDX5, XRN2, and PRMT5 in DNA/RNA hybrid resolution
Source: Life Sci Alliance. 2020 Aug 3;3(10):e202000762. doi: 10.26508/lsa.202000762 (PMC7409538; doi:10.26508/lsa.202000762)
Supplement: Supplementary file 1 [file LSA-2020-00762_Supplemental_Data_1.xlsx]

## Sheet: Sheet 1
Gene	chr	start	end	Ensembl	width	strand	Conc_siCTL	Conc_siDDX5	Conc_siXRN2	Conc_siPRMT5	Conc_siCTL_RNaseH	siCTL_A	siCTL_B	siDDX5_A	siDDX5_B	siXRN2_A	siXRN2_B	siPRMT5_A	siPRMT5_B	siCTL_RH_A	siCTL_RH_B	DDX5_vs_CTL_Fold	DDX5_vs_CTL_p.value	DDX5_vs_CTL_FDR	XRN2_vs_CTL_Fold	XRN2_vs_CTL_p.value	XRN2_vs_CTL_FDR	PRMT5_vs_CTL_Fold	PRMT5_vs_CTL_p.value	PRMT5_vs_CTL_FDR	siCTL_vs_RnaseH_Fold	siCTL_vs_RnaseH_p.value	siCTL_vs_RNaseH_FDR	start_gene	end_gene	strand_gene	introns_gene	Distance_gene	Distance_type	Neighbor	Distance_neighbor	Annotation	CpG%	GC%	Detail	DDX5_Type	XRN2_Type	PRMT5_Type	CTL_Type
CLDN19	chr1	43199465	43208212	ENSG00000164007	8748	*	4.99	7.6	5.13	5.57	6.45	31	32.76	170.88	217.35	36.67	33.15	53.02	42.04	98.57	75.73	2.61	1.81e-12	5.59e-09	0.13	0.791	0.894	0.58	0.214	0.474	-0.47	0.205	0.278	43198763	43205925	-	4	2086	TSS	LEPRE1	8166	intron	0.019094	0.600206	NM_001185117, intron 2 of 2	Gain	Unchanged	Unchanged	Unchanged
CNN2	chr19	1026479	1034160	ENSG00000064666	7682	*	5.27	7.75	7.01	7.38	5.03	25	51.99	202.02	229.59	111.61	146.04	165.05	169.03	28.85	36.41	2.49	2.83e-10	7e-07	1.74	5.91e-05	0.0103	2.12	2.48e-07	0.000122	0.74	0.0871	0.141	1026297	1039068	+	6	4022	TSS	AC011558.5	8406	intron	0.043359	0.600182	NM_001303499, intron 1 of 6	Gain	Gain	Gain	Unchanged
BAI1	chr8	143529381	143550860	ENSG00000181790	21480	*	8.29	10.47	10.28	11.12	8.47	210	418.02	1234.86	1607.14	1048.29	1432.74	2474.07	1979.35	408.7	300.01	2.18	7.86e-09	1.22e-05	1.98	7.83e-07	0.000721	2.83	1.59e-12	1.49e-08	0.38	0.273	0.348	143530790	143626370	+	30	9330	TSS	RP13-467H17.1	51732	intron	0.047397	0.642767	NM_001702, intron 1 of 30	Gain	Gain	Gain	Unchanged
RP11-867G23.10	chr11	66179120	66183264	ENSG00000254510	4145	*	3.59	6.34	5.66	5.3	4.91	12	12.11	82.49	79.59	43.84	57.63	39.34	39.41	28.85	31.31	2.75	1.09e-08	1.49e-05	2.07	0.000134	0.0161	1.71	0.00275	0.046	-0.08	0.865	0.89	66176664	66184608	+	3	3416	TTS	NPAS4	7282	Intergenic	0.011344	0.519788		Gain	Gain	Gain	Unchanged
CTB-91J4.1	chr17	34452070	34455432	ENSG00000267118	3363	*	4.98	7.29	5.93	5.71	5.33	21	42.02	148.15	165.31	65.37	56.84	50.46	54.3	43.27	37.14	2.31	1.46e-08	1.56e-05	0.96	0.0479	0.24	0.73	0.139	0.383	0.54	0.18	0.25	34443569	34504867	+	2	10182	TSS	RN7SL301P	15913	Intergenic	0.009223	0.499108		Gain	Unchanged	Unchanged	Unchanged
AC011558.5	chr19	1034526	1041160	ENSG00000267020	6635	*	5.46	7.56	7.14	7.41	4.89	36	51.99	164.98	211.99	132.33	149.19	183.87	155.9	29.65	29.86	2.1	1.51e-08	1.56e-05	1.68	1.47e-05	0.0048	1.95	2.44e-07	0.000122	1.04	0.0125	0.0301	1038725	1039063	-	0	882	TTS	CNN2	1225	exon	0.042364	0.591197	NM_004368, exon 7 of 7	Gain	Gain	Gain	Gain
RP13-766D20.2 / ACTG1	chr17	79474627	79488029	ENSG00000229848	13403	*	8.57	10.36	9.38	9.54	7.25	305	455.06	1198.66	1438.77	603.47	725.45	767.96	723.43	177.1	128.16	1.79	7.14e-08	5.57e-05	0.81	0.0204	0.17	0.97	0.00377	0.0555	1.53	6.5e-06	4.9e-05	79481072	79494269	+	1	256	TSS	RP13-766D20.1	1118	Intergenic	0.052086	0.60491		Gain	Unchanged	Unchanged	Gain
AC144831.1	chr17	81048044	81066206	ENSG00000261888	18163	*	7.18	9.03	8.3	9.09	7.55	114	175.9	433.5	612.24	257.49	371.01	638.83	452.8	217.17	158.01	1.85	6.92e-08	5.57e-05	1.12	0.00232	0.0656	1.91	8.05e-08	6.12e-05	0.2	0.55	0.613	81061204	81063860	+	0	4079	TSS	METRNL	4261	Intergenic	0.03893	0.618214		Gain	Gain	Gain	Unchanged
GPR56	chr16	57691009	57701090	ENSG00000205336	10082	*	5.8	7.84	7.27	7.26	5.93	38	73.35	210.44	247.96	141.9	166.56	159.92	147.14	70.52	51.7	2.04	7.56e-08	5.57e-05	1.47	0.00029	0.0248	1.46	0.000253	0.0118	0.64	0.0932	0.149	57653662	57698944	+	14	2894	TTS	GPR97	6106	intron	0.018155	0.56423	NM_001370429, intron 13 of 13	Gain	Gain	Gain	Unchanged
RNA5SP155	chr4	10114558	10120237	ENSG00000223086	5680	*	5.79	7.65	6.52	6.6	4.52	44	66.94	205.39	195.92	76.53	106.57	99.2	94.59	24.84	21.12	1.85	2.13e-07	0.000147	0.72	0.0818	0.305	0.8	0.0427	0.207	1.73	4.37e-05	0.000259	10117379	10117508	-	0	18	TTS	WDR1	1176	intron	0.045615	0.551858	NM_017491, intron 2 of 14	Gain	Unchanged	Unchanged	Gain
MIR3138	chr4	10090364	10104465	ENSG00000264931	14102	*	7.08	8.74	7.71	8.12	6.16	107	163.08	430.14	422.45	184.95	235.24	307.87	249.61	87.35	56.07	1.66	3.74e-07	0.000244	0.64	0.0779	0.298	1.05	0.00282	0.0467	1.23	0.000923	0.00353	10080234	10080316	-	0	17098	TSS	WDR1	21158	intron	0.022411	0.55528	NM_005112, intron 2 of 11	Gain	Unchanged	Gain	Gain
CLDN19	chr1	43180310	43188584	ENSG00000164007	8275	*	6.08	8.11	7.93	7.35	5.56	38	96.85	284.51	266.33	201.69	286.55	180.45	145.39	52.09	42.23	2.03	5.48e-07	0.000339	1.86	1.92e-05	0.00538	1.27	0.00341	0.0522	1.16	0.00341	0.0104	43198763	43205925	-	4	14316	TTS	YBX1	16427	Intergenic	0.008582	0.457336		Gain	Gain	Gain	Gain
SRF	chr6	43137461	43140750	ENSG00000112658	3290	*	5.11	7.05	6.2	6.65	4.57	30	39.17	114.48	150	56.6	90.78	100.06	100.72	27.25	20.39	1.93	7.51e-07	0.000357	1.09	0.0152	0.151	1.54	0.000137	0.00813	0.92	0.0421	0.0791	43139036	43149243	+	6	70	TSS	PTK7	9648	promoter-TSS	0.068735	0.619033	NM_003131	Gain	Unchanged	Gain	Unchanged
SOWAHC	chr2	110370651	110374872	ENSG00000198142	4222	*	7.3	8.99	7.44	6.97	5.52	118	197.26	459.6	560.2	149.87	196.56	149.66	100.72	58.5	33.5	1.69	6.71e-07	0.000357	0.14	0.724	0.855	-0.33	0.379	0.634	1.99	5.72e-07	5.78e-06	110371910	110376563	+	0	852	TSS	SEPT10	978	exon	0.072749	0.581142	NM_023016, exon 1 of 1	Gain	Unchanged	Unchanged	Gain
CTA-299D3.8	chr22	48970206	48978687	ENSG00000219016	8482	*	6.57	8.45	8.49	8.56	6.12	62	127.47	283.67	416.33	310.1	411.27	404.51	348.58	79.34	59.71	1.89	1.06e-06	0.000451	1.93	1.04e-06	0.000806	1.99	1.94e-07	0.000112	0.88	0.0213	0.0461	48934711	48943199	-	4	31248	TSS	FAM19A5	89044	intron	0.059198	0.615847	NM_015381, intron 1 of 3	Gain	Gain	Gain	Unchanged
SLC12A7	chr5	1084235	1096431	ENSG00000113504	12197	*	6.39	8.27	7.73	8.1	6.85	57	110.38	244.11	373.47	166.61	258.92	319.84	230.34	126.62	103.4	1.88	1.05e-06	0.000451	1.35	0.000996	0.0458	1.72	1.07e-05	0.00162	0.3	0.389	0.463	1050498	1112150	-	23	21817	TSS	MIR4635	27244	intron	0.04346	0.611922	NM_006598, intron 3 of 23	Gain	Gain	Gain	Unchanged
ALDH1B1	chr9	38392044	38397756	ENSG00000137124	5713	*	6.89	8.61	7.73	7.54	5.55	82	155.25	402.36	377.3	192.12	231.29	186.43	185.67	47.28	46.6	1.72	1.42e-06	0.000567	0.84	0.0303	0.199	0.65	0.0883	0.302	1.63	1.95e-05	0.000127	38392660	38398658	+	1	2240	TSS	IGFBPL1	14090	intron	0.028366	0.532738	NM_000692, intron 1 of 1	Gain	Unchanged	Unchanged	Gain
TLE3	chr15	70350325	70358546	ENSG00000140332	8222	*	6.5	8.12	7.34	8.56	6.32	76	104.68	241.58	315.31	145.88	177.61	425.89	328.43	84.95	75	1.62	1.71e-06	0.00066	0.84	0.0204	0.171	2.06	2.35e-09	3.88e-06	0.81	0.0179	0.04	70340128	70390515	-	19	14308	TTS	MIR629	17274	intron	0.02129	0.551636	NM_001282981, intron 8 of 19	Gain	Unchanged	Gain	Unchanged
RP11-1100L3.8	chr12	52438615	52450116	ENSG00000259884	11502	*	6.75	8.49	7.48	8.26	6.49	72	143.14	358.59	358.93	145.09	210.77	348.06	265.37	111.39	68.45	1.74	1.77e-06	0.000663	0.73	0.0756	0.293	1.51	9e-05	0.0063	0.7	0.07	0.118	52452242	52453116	-	1	7876	TTS	NR4A1	8468	promoter-TSS	0.024	0.574646	NM_173157	Gain	Unchanged	Gain	Unchanged
LFNG	chr7	2536192	2546758	ENSG00000106003	10567	*	6.93	8.84	7.75	8.65	7.55	68	175.9	417.51	500.51	164.22	267.6	460.09	345.95	211.56	163.11	1.91	2.02e-06	0.000737	0.82	0.0655	0.275	1.72	4.12e-05	0.00378	0.08	0.804	0.838	2552162	2568061	+	8	10687	TSS	MIR4648	25232	Intergenic	0.026787	0.619156		Gain	Unchanged	Gain	Unchanged
RP11-244F12.3	chr15	63333272	63343466	ENSG00000259498	10195	*	8.96	10.46	10.11	9.77	6.64	429	566.15	1428.46	1389.03	1038.73	1168.29	950.97	795.24	108.19	91.02	1.5	2.19e-06	0.000775	1.15	0.000729	0.0389	0.81	0.0139	0.114	2.5	1.9e-14	1.16e-12	63338232	63341586	-	1	137	TTS	TPM1	3486	non-coding	0.035613	0.516775	NR_147233, exon 2 of 2	Gain	Gain	Unchanged	Gain
RNA5SP155	chr4	10109643	10114123	ENSG00000223086	4481	*	5.65	7.43	5.37	6.22	4.19	38	62.67	186.87	156.89	36.67	45.78	80.39	69.19	17.63	18.93	1.77	2.6e-06	0.000871	-0.29	0.518	0.722	0.57	0.181	0.436	1.61	0.000563	0.00231	10117379	10117508	-	0	5496	TTS	WDR1	6690	intron	0.016298	0.531696	NM_017491, intron 2 of 14	Gain	Unchanged	Unchanged	Gain
CTD-2033D15.1	chr15	39877952	39888588	ENSG00000259279	10637	*	6.76	8.31	7.42	7.39	5.48	90	126.76	345.96	289.29	174.58	168.93	163.34	172.54	46.48	42.96	1.55	2.59e-06	0.000871	0.66	0.0606	0.266	0.63	0.0719	0.273	1.62	9.59e-06	6.86e-05	39885780	39886432	-	1	2510	TTS	THBS1	8397	intron	0.014292	0.434092	NM_003246, intron 14 of 21	Gain	Unchanged	Unchanged	Gain
EFCAB14P1	chr1	35582816	35588241	ENSG00000228348	5426	*	5.07	6.88	6.45	6.54	4.97	38	29.2	119.53	115.56	82.91	91.57	110.32	75.32	30.45	32.04	1.81	2.88e-06	0.000938	1.38	0.000851	0.0427	1.47	0.000489	0.0176	0.92	0.0303	0.0609	35587622	35588085	+	0	2094	TSS	ZMYM1	6712	Intergenic	0.024889	0.482212		Gain	Gain	Gain	Unchanged
RP11-543D5.2	chr1	48243165	48250642	ENSG00000223814	7478	*	4.91	7	5.46	7.29	5.61	16	44.15	119.53	136.99	27.1	60.78	200.97	111.23	49.69	48.06	2.09	4.01e-06	0.00121	0.55	0.361	0.606	2.38	7.55e-07	0.000276	0.09	0.808	0.841	48226803	48231219	-	1	15684	TSS	TRABD2B	20704	intron	0.013777	0.547412	NM_001194986, intron 4 of 6	Gain	Unchanged	Gain	Unchanged
RP6-91H8.3	chr14	71599649	71603965	ENSG00000269927	4317	*	5.02	6.93	6.94	6.43	5.4	23	42.02	123.74	119.39	107.62	138.14	85.52	86.71	40.07	44.42	1.9	3.91e-06	0.00121	1.92	7.31e-06	0.00332	1.41	0.0014	0.0312	0.53	0.189	0.26	71607841	71609970	-	0	6034	TTS	PCNX	19708	Intergenic	0.008806	0.471965		Gain	Gain	Gain	Unchanged
LTBP2	chr14	75064207	75070520	ENSG00000119681	6314	*	5.6	7.61	7.46	5.74	5.55	25	71.93	180.14	210.46	177.77	175.24	59.01	48.17	51.29	42.23	2.01	3.86e-06	0.00121	1.86	3.25e-05	0.00748	0.15	0.798	0.907	0.79	0.0498	0.0905	74964872	75079034	-	35	11670	TSS	CTD-2207P18.2	14032	intron	0.016318	0.536037	NM_000428, intron 2 of 35	Gain	Gain	Unchanged	Unchanged
BAI1	chr8	143607382	143620517	ENSG00000181790	13136	*	7.66	9.08	8.37	9.18	7.64	173	231.44	511.79	570.15	257.49	405.74	699.55	458.93	226.79	172.58	1.42	4.78e-06	0.00141	0.71	0.048	0.241	1.52	1.44e-05	0.00193	0.47	0.148	0.214	143530790	143626370	+	30	12420	TTS	MROH4P	34670	intron	0.027486	0.622155	NM_001702, intron 24 of 30	Gain	Unchanged	Gain	Unchanged
GNAZ	chr22	23456174	23466024	ENSG00000128266	9851	*	6.24	7.89	7	7.63	6.83	54	97.56	239.9	234.18	99.65	155.51	239.45	155.9	125.01	101.94	1.65	5.99e-06	0.00172	0.75	0.0725	0.288	1.38	0.000529	0.0183	0.27	0.43	0.502	23412539	23467224	+	2	6125	TTS	RTDR1	23181	intron	0.017058	0.569543	NM_002073, intron 2 of 2	Gain	Unchanged	Gain	Unchanged
CTD-2207P18.1	chr14	75048637	75056381	ENSG00000258425	7745	*	6.91	8.59	8.31	7.04	5.84	77	163.79	363.64	409.44	280.61	352.07	127.42	134.88	68.12	46.6	1.68	6.63e-06	0.00182	1.39	0.000446	0.031	0.12	0.773	0.895	1.39	0.000457	0.00194	75018883	75026751	+	1	25758	TTS	LTBP2	26525	intron	0.01524	0.542485	NM_000428, intron 3 of 35	Gain	Gain	Unchanged	Gain
LTBP2	chr14	75057736	75062741	ENSG00000119681	5006	*	5.4	7.24	7.12	5.56	5.37	27	57.68	142.26	160.71	117.19	160.25	52.17	42.04	53.69	29.13	1.84	7.49e-06	0.00201	1.71	7.99e-05	0.0125	0.15	0.775	0.895	0.81	0.0597	0.105	74964872	75079034	-	35	18796	TSS	CTD-2207P18.2	21156	intron	0.015987	0.517882	NM_000428, intron 2 of 35	Gain	Gain	Unchanged	Unchanged
CTD-2207P18.1	chr14	74993714	75004897	ENSG00000258425	11184	*	7.42	8.84	8.62	7.66	6.49	142	200.82	446.97	466.84	377.07	408.9	246.3	157.65	88.95	91.02	1.41	7.66e-06	0.00202	1.2	0.000387	0.0284	0.24	0.519	0.743	1.25	0.00018	0.000879	75018883	75026751	+	1	19578	TSS	LTBP2	34434	intron	0.013683	0.524278	NM_000428, intron 9 of 35	Gain	Gain	Unchanged	Gain
RP11-697E2.6	chr15	90813252	90816186	ENSG00000261147	2935	*	5.15	6.9	5.94	5.78	4	34	37.03	139.73	98.72	65.37	57.63	59.01	50.8	16.03	16.02	1.75	9.87e-06	0.00249	0.79	0.0676	0.279	0.63	0.154	0.403	1.61	0.000645	0.0026	90792787	90815440	+	12	721	TTS	NGRN	1744	non-coding	0.010569	0.464554	NR_028052, exon 2 of 2	Gain	Unchanged	Unchanged	Gain
ZNF469	chr16	88484782	88506444	ENSG00000225614	21663	*	8.6	10.15	9.39	9.8	7.47	290	485.68	969.7	1301.78	511.79	832.01	1081.82	702.41	187.52	167.48	1.55	1.1e-05	0.00273	0.79	0.0405	0.224	1.2	0.00139	0.0312	1.36	4.79e-05	0.00028	88493878	88507165	+	1	1735	TSS	ZFPM1	24111	exon	0.038872	0.638999	NM_001367624, exon 1 of 1	Gain	Unchanged	Gain	Gain
KLF2	chr19	16433650	16439779	ENSG00000127528	6130	*	7.35	8.97	7.53	7.7	4.99	112	215.07	416.67	587.75	162.63	206.82	242.87	172.54	40.07	23.3	1.62	1.13e-05	0.00275	0.18	0.659	0.817	0.34	0.38	0.634	2.47	5.89e-09	9.84e-08	16435627	16438685	+	2	1088	TSS	CTD-2562J15.6	1390	exon	0.061521	0.603687	NM_016270, exon 2 of 3	Gain	Unchanged	Unchanged	Gain
SOGA1	chr20	35478772	35495015	ENSG00000149639	16244	*	8.37	9.88	9.41	9.88	6.81	241	422.3	909.1	974.23	595.49	760.97	1063	819.77	130.62	93.21	1.51	1.23e-05	0.00287	1.03	0.00539	0.0981	1.51	4.14e-05	0.00378	1.79	4.82e-07	4.97e-06	35405844	35492089	-	14	5196	TSS	RN7SL156P	11608	intron	0.032324	0.569845	NM_080627, intron 1 of 14	Gain	Gain	Gain	Gain
INPP5E	chr9	139326230	139334626	ENSG00000148384	8397	*	7.23	8.62	8.67	8.16	6.23	130	170.2	346.8	439.29	339.6	477.58	311.29	261.87	94.56	55.34	1.39	1.47e-05	0.00334	1.44	3.32e-05	0.00748	0.93	0.00499	0.0649	1.24	0.000816	0.00318	139323070	139334274	-	9	3846	TSS	SEC16A	4120	intron	0.058368	0.635898	NM_001318502, intron 1 of 9	Gain	Gain	Unchanged	Gain
AC018816.3	chr3	4865503	4874503	ENSG00000235978	9001	*	7.86	9.16	8.33	8.33	6.25	210	254.94	578.29	563.26	341.99	299.97	345.5	296.03	68.92	83.01	1.3	1.52e-05	0.00334	0.47	0.153	0.406	0.46	0.148	0.395	1.84	2.98e-08	4.17e-07	4855980	4928977	-	4	14023	TTS	ITPR1	19521	intron	0.015446	0.457778	NM_001099952, intron 57 of 58	Gain	Unchanged	Unchanged	Gain
SPRED2	chr2	65656867	65659813	ENSG00000198369	2947	*	5.72	7.41	6.11	6.61	4.91	37	68.37	149.83	189.8	67.76	70.26	94.93	100.72	34.46	25.49	1.69	1.53e-05	0.00334	0.39	0.384	0.626	0.89	0.0325	0.18	1.09	0.0126	0.0303	65537984	65659311	-	5	971	TSS	AC074391.1	5504	intron	0.07708	0.625933	NM_181784, intron 1 of 5	Gain	Unchanged	Unchanged	Gain
CCDC124	chr19	18051481	18063276	ENSG00000007080	11796	*	7.45	8.84	8.5	9.01	5.87	139	210.79	434.35	479.08	264.66	458.63	534.49	493.09	59.3	57.53	1.38	2.02e-05	0.00431	1.05	0.00621	0.105	1.55	4.14e-06	0.000875	1.72	1.54e-06	1.39e-05	18043824	18054746	+	4	2632	TTS	KCNN1	4722	Intergenic	0.04638	0.608309		Gain	Unchanged	Gain	Gain
YTHDF1	chr20	61855787	61858466	ENSG00000149658	2680	*	4.74	6.57	6.04	3.44	5.08	20	33.47	90.91	99.49	57.4	74.2	8.55	13.14	39.27	28.4	1.83	2.05e-05	0.00431	1.3	0.00602	0.104	-1.3	0.0485	0.222	0.34	0.431	0.503	61826780	61847586	-	4	9540	TSS	BIRC7	10108	Intergenic	0.023525	0.576708		Gain	Unchanged	Unchanged	Unchanged
UBALD1	chr16	4652345	4669889	ENSG00000153443	17545	*	8.33	9.81	9.11	9.41	7.42	229	413.75	847.65	948.98	455.19	650.45	775.66	583.29	205.95	136.9	1.48	2.17e-05	0.00438	0.78	0.0405	0.224	1.08	0.00352	0.053	1.2	0.000845	0.00327	4658883	4665028	-	2	2234	TTS	C16orf96	10402	intron	0.038762	0.599692	NM_145253, intron 1 of 2	Gain	Unchanged	Gain	Gain
TPCN1	chr12	113668794	113673428	ENSG00000186815	4635	*	4.67	6.52	6.26	6.42	4.79	19	32.05	88.38	95.66	81.31	71.83	102.62	69.19	32.86	22.57	1.85	2.14e-05	0.00438	1.59	0.000541	0.034	1.75	0.00014	0.00824	0.59	0.196	0.268	113659242	113736390	+	28	11869	TSS	IQCD	12212	intron	0.017699	0.506258	NM_001351346, intron 3 of 28	Gain	Gain	Gain	Unchanged
LTBP2	chr14	74966315	74978789	ENSG00000119681	12475	*	7.54	8.84	8.65	7.73	6.61	166	207.23	433.5	485.2	349.17	452.32	242.02	183.05	100.17	94.66	1.3	2.19e-05	0.00438	1.1	0.00103	0.0462	0.19	0.581	0.783	1.31	5.44e-05	0.000313	74964872	75079034	-	35	7680	TTS	ISCA2	8743	intron	0.019963	0.569024	NM_000428, intron 28 of 35	Gain	Gain	Unchanged	Gain
GRIFIN	chr7	2532314	2535763	ENSG00000236734	3450	*	4.5	6.37	5.2	6.7	5.6	19	26.35	75.76	89.54	26.31	47.36	119.73	88.46	52.89	44.42	1.87	2.37e-05	0.00465	0.7	0.207	0.465	2.2	4.47e-07	0.000185	-0.02	0.97	0.977	2514359	2516017	-	4	18022	TSS	LFNG	18124	Intergenic	0.024072	0.614961		Gain	Unchanged	Gain	Unchanged
SYNJ2	chr6	158401475	158405440	ENSG00000078269	3966	*	4.08	6.24	5.63	5.81	4.55	9	24.92	80.81	70.41	43.84	55.26	59.01	53.42	25.64	21.12	2.16	2.56e-05	0.00495	1.55	0.00671	0.108	1.73	0.00166	0.034	0.74	0.116	0.177	158402887	158520205	+	26	570	TSS	SYNJ2-IT1	18680	intron	0.048688	0.538966	NM_003898, intron 1 of 26	Gain	Unchanged	Gain	Unchanged
CARS2	chr13	111363319	111369228	ENSG00000134905	5910	*	5.93	7.71	7.12	6.77	4.96	33	89.02	190.24	229.59	106.82	172.09	104.33	113.86	34.46	27.67	1.78	2.7e-05	0.00514	1.19	0.0109	0.129	0.84	0.0667	0.263	1.45	0.00087	0.00336	111296302	111365950	-	14	324	TSS	ING1	650	5' UTR	0.071936	0.588424	NM_198219, exon 1 of 2	Gain	Unchanged	Unchanged	Gain
GAS6	chr13	114521962	114527565	ENSG00000183087	5604	*	6.02	7.57	7.42	7.25	5.82	49	81.18	172.56	206.63	144.29	198.93	171.89	133.12	63.31	49.52	1.54	2.75e-05	0.00517	1.4	0.00036	0.0272	1.23	0.00153	0.0327	0.63	0.102	0.159	114523523	114567046	-	14	1240	TTS	GAS6-AS1	6162	intron	0.049982	0.631447	NM_000820, intron 14 of 14	Gain	Gain	Gain	Unchanged
FGF17	chr8	21896780	21902304	ENSG00000158815	5525	*	4.88	6.67	5.44	5.07	5.22	21	37.74	93.43	110.2	25.51	61.57	39.34	28.03	44.08	30.58	1.79	2.87e-05	0.00531	0.57	0.315	0.567	0.2	0.73	0.871	0.04	0.914	0.931	21899908	21906317	+	4	366	TSS	NPM2	5135	promoter-TSS	0.020641	0.588523	NM_001304478	Gain	Unchanged	Unchanged	Unchanged
KIAA0930	chr22	45619953	45627661	ENSG00000100364	7709	*	6.53	7.9	7.19	7.87	6.32	81	103.26	223.07	254.08	121.17	170.51	281.36	187.42	96.97	63.35	1.37	3e-05	0.00545	0.66	0.0731	0.289	1.35	0.000182	0.00976	0.53	0.149	0.215	45586218	45636650	-	9	12843	TSS	MIR1249	26907	intron	0.023485	0.564478	NM_001009880, intron 1 of 9	Gain	Unchanged	Gain	Unchanged
PVRL3-AS1	chr3	110667473	110671302	ENSG00000242242	3830	*	4.06	6.19	5.81	5.2	4.71	17	16.38	100.17	45.92	70.15	41.84	31.64	42.04	30.45	21.85	2.13	3.62e-05	0.0065	1.75	0.000749	0.0396	1.14	0.0383	0.196	0.63	0.176	0.245	110612554	110790371	-	3	56834	TTS	RP11-553A10.1	57328	Intergenic	0.002612	0.454688		Gain	Gain	Unchanged	Unchanged
SIK1	chr21	44836266	44842211	ENSG00000142178	5946	*	6.71	8.36	7.54	7.9	5.72	62	147.41	279.46	378.06	169	203.66	278.79	200.56	63.31	42.23	1.65	3.73e-05	0.00655	0.83	0.0484	0.241	1.19	0.00426	0.0594	1.27	0.00225	0.0074	44834394	44847008	-	13	4844	TTS	LINC00319	27242	exon	0.04677	0.629268	NM_001320643, exon 10 of 14	Gain	Unchanged	Gain	Gain
RRBP1	chr20	17661364	17665132	ENSG00000125844	3769	*	5.23	6.97	6.12	6.25	5.19	24	51.27	122.05	128.57	58.99	79.73	95.78	56.05	36.06	37.14	1.74	3.84e-05	0.0066	0.88	0.0652	0.275	1.01	0.0367	0.191	0.65	0.119	0.18	17594322	17662940	-	25	308	TSS	BANF2	11068	promoter-TSS	0.076719	0.626858	NM_001042576	Gain	Unchanged	Unchanged	Unchanged
KSR1P1	chr10	42642246	42647389	ENSG00000229485	5144	*	5.26	7.1	6.88	6.89	5.78	21	55.55	115.32	159.95	95.66	140.51	139.4	97.22	56.1	53.88	1.85	4.16e-05	0.00677	1.63	0.000573	0.0351	1.63	0.000483	0.0174	0.28	0.477	0.546	42644757	42644997	-	0	60	TTS	IGKV1OR10-1	35968	Intergenic	0.04084	0.499319		Gain	Gain	Gain	Unchanged
AC008753.6	chr19	54368668	54381521	ENSG00000228323	12854	*	7.41	8.75	7.63	8.3	6.33	135	205.81	409.09	452.3	176.97	217.87	331.81	298.65	88.95	72.09	1.34	4.11e-05	0.00677	0.21	0.558	0.751	0.89	0.0095	0.0924	1.37	7.74e-05	0.000424	54357834	54372361	-	3	2734	TSS	AC008440.5	2784	intron	0.034469	0.569672	NM_001290189, intron 2 of 2	Gain	Unchanged	Unchanged	Gain
SLC39A3	chr19	2730662	2736305	ENSG00000141873	5644	*	5.38	7.2	7.27	7.13	4.83	22	61.24	137.21	156.89	137.12	170.51	159.92	120.86	31.25	25.49	1.82	4.09e-05	0.00677	1.89	3.46e-05	0.00762	1.75	0.00013	0.00788	1.03	0.023	0.049	2732201	2740015	-	3	1282	TTS	AC006538.4	6562	intron	0.04307	0.624845	NM_144564, intron 2 of 2	Gain	Gain	Gain	Gain
SSR2	chr1	155987981	155991740	ENSG00000163479	3760	*	4.97	6.63	5.38	5.7	4.42	34	28.49	114.48	84.18	35.87	47.36	53.88	49.92	21.64	21.12	1.67	4.42e-05	0.00701	0.41	0.385	0.626	0.73	0.104	0.329	1.09	0.018	0.0403	155978838	155990750	-	5	890	TSS	UBQLN4	15230	exon	0.027674	0.497207	NM_003145, exon 2 of 6	Gain	Unchanged	Unchanged	Gain
EGR1	chr5	137797580	137806531	ENSG00000120738	8952	*	9.73	11.47	9.76	8	5.72	516	1185.71	2514.32	3149.23	802.76	927.53	294.19	218.95	52.09	53.16	1.73	4.49e-05	0.00704	0.02	0.956	0.979	-1.73	2.31e-05	0.00271	4.05	6.91e-23	2.74e-20	137801178	137805004	+	1	878	TSS	RPL7P19	7376	intron	0.040447	0.567646	NM_001964, intron 1 of 1	Gain	Unchanged	Loss	Gain
UTP3	chr4	71552215	71555901	ENSG00000132467	3687	*	6.15	7.71	6.33	6.8	4.49	47	94.71	218.01	199.74	75.73	85.25	141.11	82.33	23.24	21.85	1.56	4.55e-05	0.00704	0.18	0.684	0.831	0.66	0.137	0.379	1.95	7.96e-06	5.83e-05	71554195	71556267	+	0	137	TSS	ENAM	1525	promoter-TSS	0.035821	0.473142	NM_020368	Gain	Unchanged	Unchanged	Gain
ZNF469	chr16	88461773	88470841	ENSG00000225614	9069	*	6.2	7.63	7.13	7.83	6.08	59	87.59	178.45	218.88	117.19	163.4	237.74	218.08	81.74	53.88	1.44	4.99e-05	0.00753	0.94	0.0155	0.152	1.64	3.97e-06	0.000853	0.73	0.0503	0.0913	88493878	88507165	+	1	27571	TSS	ZFPM1	53417	Intergenic	0.020404	0.573445		Gain	Unchanged	Gain	Unchanged
MEX3A	chr1	156039652	156043545	ENSG00000254726	3894	*	4.73	6.44	6.09	6.06	4.37	23	29.91	83.33	90.31	66.17	70.26	60.72	72.69	28.85	12.38	1.71	5.08e-05	0.00757	1.37	0.00235	0.0659	1.33	0.00315	0.0498	0.86	0.0938	0.149	156041803	156051789	-	2	204	TTS	RAB25	1304	TTS	0.008736	0.519137	NM_001093725	Gain	Gain	Gain	Unchanged
MLF2	chr12	6875068	6881343	ENSG00000089693	6276	*	7.2	8.6	7.64	8.7	6.08	106	188.72	399.83	376.53	165.02	233.66	451.54	379.23	80.14	55.34	1.4	5.56e-05	0.00809	0.44	0.262	0.519	1.5	3.68e-05	0.00359	1.37	0.000274	0.00125	6857960	6876641	-	8	1564	TSS	PTMS	1836	intron	0.040644	0.603347	NM_002824, intron 1 of 4	Gain	Unchanged	Gain	Gain
HS6ST1	chr2	129030896	129046137	ENSG00000136720	15242	*	7.4	8.69	8.07	8.7	6.89	137	200.11	394.78	431.63	216.83	318.91	462.66	366.97	127.42	109.23	1.29	5.72e-05	0.00823	0.67	0.066	0.276	1.3	0.000143	0.0084	0.98	0.00271	0.00862	128994289	129075970	-	2	37454	TSS	AC017079.4	62870	intron	0.019291	0.565777	NM_004807, intron 1 of 1	Gain	Unchanged	Gain	Unchanged
RPL28	chr19	55892919	55903393	ENSG00000108107	10475	*	8.81	10.04	9.8	9.61	6.43	400	496.36	1016	1088.26	864.94	919.64	795.33	767.22	107.38	65.54	1.23	5.85e-05	0.00833	0.99	0.00252	0.0684	0.8	0.0116	0.103	2.48	1.37e-12	5.35e-11	55897303	55914612	+	4	853	TSS	TMEM238	2190	3' UTR	0.038384	0.574852	NM_001136136, exon 3 of 3	Gain	Unchanged	Unchanged	Gain
SKI	chr1	2198926	2206768	ENSG00000157933	7843	*	5.11	6.74	6.16	6.89	5.37	29	39.88	91.75	121.68	61.38	81.31	129.13	108.6	55.3	27.67	1.63	5.94e-05	0.00835	1.05	0.0171	0.158	1.79	7.9e-06	0.00127	0.37	0.403	0.476	2160133	2241558	+	6	38711	TTS	MORN1	49844	intron	0.033669	0.622928	NM_003036, intron 1 of 6	Gain	Unchanged	Gain	Unchanged
PPP1R15B	chr1	204378338	204381401	ENSG00000158615	3064	*	5.68	7.19	6.68	6.24	4.31	41	61.24	162.46	129.34	108.42	96.31	73.55	77.95	20.84	18.93	1.51	6.26e-05	0.00871	1	0.0123	0.135	0.57	0.171	0.425	1.76	6.15e-05	0.000349	204372514	204380919	-	1	1050	TSS	RP11-739N20.2	25104	exon	0.04017	0.535096	NM_032833, exon 1 of 2	Gain	Unchanged	Unchanged	Gain
RP5-977B1.11	chr20	35171907	35179937	ENSG00000259716	8031	*	7.72	9.03	8.75	9.31	5.78	164	257.08	495.79	547.19	341.19	520.21	661.92	605.19	59.3	50.24	1.31	6.4e-05	0.0088	1.03	0.00534	0.0979	1.59	3.17e-06	0.00072	2.12	2.95e-09	5.27e-08	35177529	35232932	-	1	1607	TTS	MYL9	2306	intron	0.022792	0.57061	NM_181526, intron 2 of 2	Gain	Gain	Gain	Gain
NKX2-5	chr5	172657145	172661935	ENSG00000183072	4791	*	4.49	6.31	6.44	6.04	4.95	18	27.06	68.18	90.31	85.3	88.41	71.84	59.56	32.06	29.86	1.81	6.54e-05	0.00889	1.95	1.28e-05	0.0048	1.54	0.00105	0.0266	0.29	0.514	0.579	172659111	172662360	-	1	429	TTS	RPL7AP33	6114	3' UTR	0.053247	0.577244	NM_004387, exon 2 of 2	Gain	Gain	Gain	Unchanged
CRLF1	chr19	18681302	18687163	ENSG00000006016	5862	*	6.45	7.83	6.86	7.29	4.42	70	104.68	249.16	206.63	97.26	134.99	185.58	126.99	23.24	19.66	1.38	6.66e-05	0.00895	0.41	0.294	0.549	0.84	0.0273	0.163	2.25	7.12e-08	9.06e-07	18683029	18705245	-	8	1204	TTS	UBA52	1564	intron	0.036348	0.543764	NM_001321022, intron 2 of 3	Gain	Unchanged	Unchanged	Gain
TGFBI	chr5	135383096	135386802	ENSG00000120708	3707	*	4.83	6.47	6.3	6.24	4.34	30	27.06	85.86	91.07	79.72	77.36	93.22	57.8	20.03	20.39	1.63	6.75e-05	0.00899	1.46	0.00059	0.0356	1.4	0.00172	0.0348	1.06	0.025	0.0523	135364583	135399506	+	16	14557	TTS	VTRNA2-1	31210	intron	0.011606	0.514301	NM_000358, intron 6 of 16	Gain	Gain	Gain	Gain
JUNB	chr19	12895599	12906360	ENSG00000171223	10762	*	7.7	9.28	8.27	8.63	6.09	124	292.69	516.84	725.51	267.06	350.49	402.8	391.49	76.93	59.71	1.58	7.18e-05	0.00945	0.57	0.172	0.427	0.93	0.0201	0.14	1.77	9.5e-06	6.8e-05	12902309	12904124	+	0	1330	TSS	MIR5684	2974	Intergenic	0.043773	0.590837		Gain	Unchanged	Unchanged	Gain
FUT7	chr9	139923935	139932789	ENSG00000180549	8855	*	5.32	6.99	7.1	7.16	5.87	27	52.7	105.22	148.47	117.19	157.88	155.64	131.37	68.12	48.79	1.67	7.72e-05	0.00995	1.79	2.66e-05	0.00666	1.85	7.65e-06	0.00127	0.29	0.447	0.518	139924625	139927462	-	1	900	TSS	C9orf139	2872	intron	0.029143	0.617235	NM_207511, intron 2 of 2	Gain	Gain	Gain	Unchanged
LTBP2	chr14	75075735	75083154	ENSG00000119681	7420	*	7.35	8.55	8.46	7.39	6.03	149	176.61	357.75	394.13	293.36	411.27	186.43	149.76	78.54	52.43	1.21	7.72e-05	0.00995	1.11	0.00111	0.0477	0.05	0.895	0.954	1.6	6.69e-06	5.02e-05	74964872	75079034	-	35	410	TSS	CTD-2207P18.2	1950	promoter-TSS	0.039633	0.567732	NM_000428	Gain	Gain	Unchanged	Gain
ACTN1	chr14	69434090	69448250	ENSG00000072110	14161	*	7.71	9.21	8.06	8.73	7.6	127	291.26	574.08	611.48	228.79	303.12	484.04	367.84	216.37	170.39	1.5	8.02e-05	0.0102	0.35	0.403	0.64	1.03	0.0109	0.0996	0.73	0.0353	0.0688	69340859	69446157	-	21	4987	TSS	ACTN1-AS1	5228	intron	0.025708	0.531497	NM_001130005, intron 1 of 20	Gain	Unchanged	Gain	Unchanged
CTC-492K19.4	chr19	40947546	40952335	ENSG00000268366	4790	*	4.69	6.36	5.19	5.95	4.79	23	28.49	86.7	78.06	37.47	35.52	59.01	64.81	24.84	30.58	1.68	8.68e-05	0.0109	0.5	0.327	0.576	1.27	0.00551	0.0684	0.83	0.0566	0.1	40949342	40949994	+	1	54	TTS	SERTAD3	672	intron	0.042398	0.560451	NM_203344, intron 1 of 1	Gain	Unchanged	Gain	Unchanged
ARPC2	chr2	219080671	219083011	ENSG00000163466	2341	*	5.26	6.78	5.11	5.31	3.62	33	43.44	111.95	107.91	22.32	46.57	52.17	27.15	13.62	10.92	1.52	8.75e-05	0.0109	-0.15	0.764	0.878	0.05	0.923	0.967	1.86	0.00025	0.00116	219081816	219119071	+	10	25	TSS	HMGB1P9	15730	promoter-TSS	0.053014	0.573504	NM_005731	Gain	Unchanged	Unchanged	Gain
AC012360.6	chr2	105994563	106004344	ENSG00000238273	9782	*	7.94	9.1	9.05	8.76	5.97	248	242.84	590.91	507.4	558.82	500.47	441.28	423.02	60.9	64.81	1.16	8.98e-05	0.0111	1.11	0.000457	0.031	0.82	0.00801	0.0842	2.21	1.8e-11	5.49e-10	105979494	105995296	+	3	4158	TTS	FHL2	22172	intron	0.01544	0.459973	NM_001318899, intron 3 of 7	Gain	Gain	Unchanged	Gain
PMEPA1	chr20	56286402	56290939	ENSG00000124225	4538	*	5.23	6.98	6.81	5.99	5.32	20	54.83	121.21	131.63	102.04	123.14	64.14	63.06	47.28	32.77	1.76	9.47e-05	0.0116	1.59	0.000699	0.0376	0.77	0.13	0.369	0.59	0.168	0.237	56223453	56286541	-	4	2130	TSS	ZBP1	93038	TTS	0.020062	0.54309	NR_131157	Gain	Gain	Unchanged	Unchanged
RP11-438D8.2	chr3	141092455	141102108	ENSG00000249417	9654	*	6.52	7.81	7.22	7.01	5.58	83	100.41	244.95	202.81	132.33	165.77	158.21	99.84	55.3	40.05	1.29	9.87e-05	0.012	0.7	0.0499	0.245	0.49	0.193	0.45	1.41	0.000147	0.000738	140986194	141085979	-	2	11302	TSS	ZBTB38	54228	intron	0.007563	0.434062	NM_001080412, intron 3 of 7	Gain	Unchanged	Unchanged	Gain
STK35	chr20	2087480	2090722	ENSG00000125834	3243	*	4.95	6.58	5.82	5.69	4.08	27	34.89	111.95	79.59	63.77	48.94	53.02	49.92	18.43	15.29	1.63	0.000104	0.0125	0.86	0.0613	0.267	0.73	0.113	0.343	1.34	0.0054	0.0153	2083536	2157684	+	3	5565	TSS	RPL7P2	32633	intron	0.010182	0.458667	NM_080836, intron 2 of 3	Gain	Unchanged	Unchanged	Gain
HSPB9	chr17	40272480	40277617	ENSG00000197723	5138	*	5.54	7.03	7.71	6.92	5.03	37	56.26	138.05	122.45	154.65	265.23	129.13	113.86	38.47	26.94	1.48	0.000108	0.0129	2.17	1.04e-07	0.000262	1.38	0.000431	0.0161	0.97	0.0213	0.0461	40274755	40275371	+	0	294	TSS	KAT2A	1672	exon	0.038162	0.573486	NM_033194, exon 1 of 1	Gain	Gain	Gain	Unchanged
MSI1	chr12	120779248	120788040	ENSG00000135097	8793	*	6.88	8.08	7.88	7.79	5.51	113	122.49	255.89	284.69	194.51	276.29	266.82	176.04	52.09	39.32	1.2	0.000123	0.0142	1	0.00402	0.0857	0.91	0.00934	0.0916	1.66	4.87e-06	3.8e-05	120779132	120806983	-	14	4512	TTS	PLA2G1B	18052	intron	0.019793	0.538558	NM_002442, intron 13 of 14	Gain	Unchanged	Unchanged	Gain
ZNF593	chr1	26495217	26502207	ENSG00000142684	6991	*	6.23	7.63	6.52	6.99	5.27	55	95.43	203.7	193.62	82.91	101.04	129.99	124.37	41.67	35.68	1.4	0.000122	0.0142	0.29	0.487	0.702	0.76	0.0518	0.229	1.32	0.0008	0.00312	26496361	26498551	+	2	161	TTS	RP11-96L14.7	556	Intergenic	0.027901	0.529185		Gain	Unchanged	Unchanged	Gain
AAR2	chr20	34827138	34831033	ENSG00000131043	3896	*	5.4	6.94	6.63	6	4.51	31	53.41	111.95	133.93	102.04	96.31	76.11	51.67	20.03	25.49	1.54	0.000122	0.0142	1.23	0.0033	0.0784	0.6	0.195	0.453	1.45	0.00103	0.00388	34824380	34858840	+	3	4706	TSS	EPB41L1	10822	intron	0.014638	0.45828	NM_015511, intron 2 of 3	Gain	Gain	Unchanged	Gain
ZNF469	chr16	88476436	88483282	ENSG00000225614	6847	*	5.32	6.78	6.27	6.12	5.74	37	42.73	108.59	110.97	73.34	81.31	84.66	54.3	59.3	47.33	1.46	0.000125	0.0143	0.96	0.0202	0.17	0.8	0.0651	0.26	0.29	0.45	0.521	88493878	88507165	+	1	14019	TSS	ZFPM1	39865	Intergenic	0.035939	0.613059		Gain	Unchanged	Unchanged	Unchanged
ZNF667	chr19	56978280	56981494	ENSG00000198046	3215	*	4.76	6.4	5.86	6.29	3.94	23	31.33	84.18	84.18	56.6	59.2	69.27	87.58	16.83	13.84	1.63	0.000126	0.0143	1.09	0.0187	0.165	1.53	0.000526	0.0183	1.47	0.0028	0.00887	56950693	56988743	-	6	8856	TSS	ZNF667-AS1	9664	intron	0.009648	0.484754	NM_001321355, intron 1 of 5	Gain	Unchanged	Gain	Gain
AL354984.3	chr20	56592820	56596667	ENSG00000221451	3848	*	5.1	6.71	5.22	4.44	4.92	26	42.73	118.69	90.31	42.25	32.36	19.67	23.65	31.25	29.13	1.6	0.00013	0.0144	0.12	0.831	0.914	-0.67	0.217	0.477	0.75	0.0801	0.132	56551073	56551149	+	0	43594	TTS	AL354984.2	47768	Intergenic	0.019501	0.554458		Gain	Unchanged	Unchanged	Unchanged
PER2	chr2	239194400	239198820	ENSG00000132326	4421	*	6.11	7.57	6.96	6.97	5.02	48	90.44	170.88	210.46	114	135.77	131.7	118.24	41.67	23.3	1.46	0.00013	0.0144	0.85	0.037	0.217	0.85	0.0342	0.185	1.44	0.000876	0.00337	239152678	239197250	-	22	640	TSS	AC012485.1	4112	intron	0.049785	0.569005	NM_022817, intron 1 of 22	Gain	Unchanged	Unchanged	Gain
KIAA0930	chr22	45629682	45640217	ENSG00000100364	10536	*	7.12	8.47	8.3	8.47	6.41	98	179.46	329.13	381.12	286.99	344.96	361.75	347.7	93.76	75.73	1.36	0.000129	0.0144	1.19	0.0015	0.0535	1.35	0.000196	0.0101	1.14	0.00135	0.00486	45586218	45636650	-	9	1700	TSS	CTA-268H5.14	23216	intron	0.030758	0.566018	NM_001009880, intron 1 of 9	Gain	Gain	Gain	Gain
HTRA3	chr4	8272110	8277843	ENSG00000170801	5734	*	5.02	6.57	5.8	6.78	5.12	27	37.74	97.64	92.6	44.64	67.1	125.71	94.59	44.08	25.49	1.56	0.000143	0.0148	0.79	0.0961	0.327	1.77	1.94e-05	0.00244	0.52	0.241	0.315	8271491	8308838	+	8	3486	TSS	SH3TC1	32146	intron	0.026867	0.599163	NM_001297559, intron 1 of 6	Gain	Unchanged	Gain	Unchanged
SNORA74A	chr5	138618194	138621188	ENSG00000200959	2995	*	4.69	6.31	6.33	5.8	3.71	28	23.5	83.33	75	96.46	64.73	51.31	60.43	16.03	10.19	1.62	0.000143	0.0148	1.65	0.00023	0.0216	1.12	0.0154	0.12	1.61	0.00193	0.00651	138614469	138614667	+	0	5024	TTS	MATR3	9899	TTS	0.007016	0.398798	NR_036536	Gain	Gain	Unchanged	Gain
C11orf24	chr11	68024168	68032222	ENSG00000171067	8055	*	6.57	7.99	7.63	7.62	5.82	63	126.76	240.74	268.62	190.53	206.82	213.8	178.67	67.32	45.87	1.42	0.000141	0.0148	1.07	0.00678	0.108	1.05	0.00762	0.0821	1.07	0.00741	0.0197	68028802	68039430	-	4	607	TTS	SUV420H1	47313	TTS	0.021483	0.558356	NM_022338	Gain	Unchanged	Gain	Gain
ANKRD54	chr22	38246822	38251026	ENSG00000100124	4205	*	5.91	7.26	6.78	6.65	4.74	53	67.65	149.83	156.12	103.63	116.83	110.32	91.09	26.45	26.94	1.34	0.000144	0.0148	0.87	0.0219	0.175	0.74	0.0536	0.234	1.77	9.18e-06	6.6e-05	38227866	38245334	-	7	3590	TSS	EIF3L	4050	intron	0.013086	0.436013	NM_001363785, intron 3 of 11	Gain	Unchanged	Unchanged	Gain
EEF1A2	chr20	62109236	62136590	ENSG00000101210	27355	*	9.48	10.94	11.07	11.37	8.21	503	926.49	1651.52	2278.31	1693.21	2594.71	3038.49	2236.84	319.75	270.88	1.46	0.000145	0.0148	1.58	0.000168	0.0181	1.88	3.15e-06	0.00072	1.5	2.18e-05	0.000141	62119365	62130505	-	7	3548	TTS	RP4-697K14.3	10726	intron	0.036596	0.617497	NM_001958, intron 5 of 7	Gain	Gain	Gain	Gain
STX1A	chr7	73130602	73134500	ENSG00000106089	3899	*	5.84	7.38	5.83	6.21	5.05	36	78.33	150.67	182.14	53.41	59.99	81.24	66.56	37.66	28.4	1.54	0.000148	0.015	-0.01	0.957	0.979	0.37	0.422	0.668	1.12	0.01	0.0252	73113535	73133989	-	9	1438	TSS	MIR4284	6824	intron	0.039518	0.620831	NM_004603, intron 1 of 9	Gain	Unchanged	Unchanged	Gain
CSK	chr15	75087027	75101586	ENSG00000103653	14560	*	8.15	9.45	9.23	9.44	6.39	214	352.51	599.33	798.21	533.31	667.03	767.96	621.83	93.76	74.27	1.3	0.000151	0.0152	1.08	0.00264	0.0698	1.29	0.000244	0.0116	1.97	1.93e-08	2.83e-07	75074397	75095539	+	14	1232	TTS	LMAN1L	10750	intron	0.02205	0.549351	NM_001354988, intron 13 of 14	Gain	Gain	Gain	Gain
GP1BB	chr22	19698403	19719232	ENSG00000203618	20830	*	8.82	10.26	10.38	10.64	8.28	295	611.72	1093.44	1366.84	1041.92	1626.93	1822.41	1368.03	363.02	259.23	1.44	0.000155	0.0154	1.56	0.000219	0.0211	1.82	6.67e-06	0.00117	0.89	0.0151	0.0349	19710467	19712294	+	1	1650	TSS	SEPT5	2024	intron	0.055886	0.644678	NM_001009939, intron 7 of 10	Gain	Gain	Gain	Unchanged
MIR3909	chr22	35722193	35729923	ENSG00000266320	7731	*	6.5	7.79	7.37	8.28	6.93	75	105.4	199.5	241.84	141.9	189.45	337.8	285.52	148.25	95.39	1.29	0.000159	0.0157	0.88	0.0175	0.16	1.79	1.88e-07	0.00011	0.2	0.567	0.629	35731632	35731751	+	0	5574	TSS	TOM1	17927	intron	0.018372	0.52238	NM_001135732, intron 7 of 14	Gain	Unchanged	Gain	Unchanged
JUP	chr17	39775602	39778549	ENSG00000173801	2948	*	4.27	6.21	4.12	3.65	4.32	10	28.49	83.33	65.05	7.17	27.63	11.12	14.01	21.64	18.2	1.95	0.00016	0.0157	-0.15	0.831	1	-0.61	0.384	0.638	0.72	0.152	0.219	39775691	39928106	-	14	1384	TTS	KRT17	1388	exon	0.01833	0.564303	NM_000422, exon 6 of 8	Gain	Unchanged	Unchanged	Unchanged
AC002472.11	chr22	21382073	21387976	ENSG00000226872	5904	*	5.97	7.35	6.32	7.33	6.19	51	74.77	144.78	181.38	63.77	96.31	196.69	125.24	79.34	66.26	1.37	0.000169	0.0164	0.35	0.411	0.647	1.36	0.000542	0.0186	0.38	0.294	0.369	21385645	21398258	+	2	620	TSS	SLC7A4	1822	intron	0.030159	0.608335	NM_004173, intron 2 of 4	Gain	Unchanged	Gain	Unchanged
RMDN3	chr15	41028318	41033383	ENSG00000137824	5066	*	5.72	7.07	7.17	6.69	4.61	54	51.27	143.94	123.98	148.28	140.51	112.03	94.59	25.64	23.3	1.35	0.000172	0.0164	1.46	6.11e-05	0.0106	0.97	0.00991	0.0943	1.52	0.000307	0.00138	41028081	41048049	-	13	2770	TTS	RAD51	6496	intron	0.010269	0.471668	NM_001323894, intron 7 of 12	Gain	Gain	Unchanged	Gain
CCNB1IP1	chr14	20777287	20780103	ENSG00000100814	2817	*	5.33	6.77	6.47	6.17	3.05	37	43.44	102.69	115.56	78.92	98.67	93.22	50.8	6.41	10.19	1.44	0.00017	0.0164	1.14	0.00507	0.096	0.84	0.0607	0.25	2.49	5.25e-06	4.07e-05	20779529	20801457	-	7	834	TTS	CTD-2292M16.7	3725	TTS	0.041208	0.567827	NM_182852	Gain	Gain	Unchanged	Gain
TPM4	chr19	16211127	16216771	ENSG00000167460	5645	*	5.65	7.05	6.88	6.13	4.49	46	54.12	151.52	113.27	118.78	116.83	76.11	63.93	20.84	24.03	1.4	0.000172	0.0164	1.23	0.00107	0.0466	0.48	0.234	0.495	1.46	0.000729	0.00288	16178347	16213813	+	9	136	TTS	CTD-2231E14.5	621	TTS	0.016481	0.467399	NM_001145160	Gain	Gain	Unchanged	Gain
KCNG1	chr20	49628735	49640526	ENSG00000026559	11792	*	7.91	9.23	8.95	8.76	6.63	167	314.05	598.49	598.47	445.62	543.1	456.67	409.88	120.21	77.91	1.32	0.000176	0.0165	1.04	0.00571	0.101	0.85	0.0206	0.141	1.61	1.3e-05	8.94e-05	49620192	49639666	-	3	5036	TSS	RP5-955M13.4	8074	intron	0.027311	0.53473	NM_002237, intron 1 of 2	Gain	Unchanged	Unchanged	Gain
PMEPA1	chr20	56247015	56286040	ENSG00000124225	39026	*	10.15	11.52	11.21	10.7	8.46	890	1376.56	2893.11	3000	2258.42	2483.41	1854.05	1475.75	393.48	310.93	1.38	0.000176	0.0165	1.06	0.00605	0.104	0.55	0.133	0.373	1.92	4.49e-08	6.01e-07	56223453	56286541	-	4	20014	TSS	ZBP1	70896	promoter-TSS	0.026676	0.53786	NM_001255976	Gain	Unchanged	Unchanged	Gain
MAPK1	chr22	22214983	22219155	ENSG00000100030	4173	*	4.48	6.23	5.51	5.59	4.9	16	28.49	82.49	67.35	46.24	45	69.27	27.15	24.04	35.68	1.75	0.000178	0.0166	1.04	0.0471	0.238	1.12	0.0523	0.231	0.57	0.209	0.282	22108788	22221919	-	8	4850	TSS	KB-1027C11.4	22551	intron	0.011029	0.441755	NM_002745, intron 1 of 8	Gain	Unchanged	Unchanged	Unchanged
TMEM201	chr1	9669053	9680249	ENSG00000188807	11197	*	7.34	8.55	8.43	8.55	6.23	133	191.56	351.85	395.66	261.48	430.22	404.51	346.82	87.35	62.62	1.2	0.000188	0.0171	1.09	0.00342	0.0792	1.21	0.000322	0.0135	1.43	4.95e-05	0.000289	9648931	9674935	+	10	284	TTS	SLC25A33	29414	3' UTR	0.023761	0.557163	NM_001130924, exon 11 of 11	Gain	Gain	Gain	Gain
TPM2	chr9	35681117	35694546	ENSG00000198467	13430	*	8	9.15	8.66	8.73	6.9	217	294.11	578.29	558.67	364.31	446	442.99	405.5	134.63	104.13	1.15	0.000186	0.0171	0.66	0.0485	0.241	0.73	0.0245	0.154	1.42	1.6e-05	0.000107	35681988	35691017	-	8	3186	TSS	CA9	6676	intron	0.023905	0.538015	NM_213674, intron 2 of 8	Gain	Unchanged	Unchanged	Gain
ARL9	chr4	57369811	57374983	ENSG00000196503	5173	*	6.07	7.34	7.02	6.94	5.43	63	71.21	168.35	156.12	110.81	149.19	135.98	110.35	40.87	45.15	1.27	0.000199	0.0178	0.95	0.0105	0.127	0.88	0.0165	0.125	1.06	0.00496	0.0142	57371508	57390614	+	3	889	TSS	SRP72	3124	intron	0.031522	0.492459	NM_001363794, intron 1 of 3	Gain	Unchanged	Unchanged	Gain
DOC2GP	chr11	67376903	67385783	ENSG00000231793	8881	*	6.57	7.99	8.05	8.03	5.96	60	129.61	239.9	270.15	232.78	296.02	278.79	242.6	79.34	45.15	1.43	0.000203	0.0178	1.48	0.00024	0.0223	1.46	0.000214	0.0108	1.01	0.0133	0.0317	67380307	67383728	-	9	1036	TTS	NDUFV1	1366	intron	0.02489	0.579392	NR_033791, intron 4 of 4	Gain	Gain	Gain	Gain
DHRS11	chr17	34946218	34949530	ENSG00000108272	3313	*	6.03	7.38	7.12	7.28	4.9	51	79.76	164.98	168.37	113.2	164.19	135.12	176.04	37.66	21.85	1.35	0.000198	0.0178	1.09	0.00638	0.105	1.25	0.00106	0.0267	1.52	0.00035	0.00154	34948227	34957235	+	6	353	TSS	GGNBP2	1596	promoter-TSS	0.038055	0.522947	NM_024308	Gain	Unchanged	Gain	Gain
CCDC42B	chr12	113593899	113607845	ENSG00000186710	13947	*	8.05	9.32	8.82	9.34	6.57	194	337.55	620.37	655.87	388.23	518.63	738.89	554.39	112.19	77.19	1.26	0.000201	0.0178	0.77	0.0379	0.219	1.28	0.000435	0.0162	1.73	1.81e-06	1.59e-05	113587662	113597081	+	7	3791	TTS	AC089999.1	3955	intron	0.022876	0.564104	NM_024072, intron 16 of 19	Gain	Unchanged	Gain	Gain
GPR61	chr1	110088712	110092677	ENSG00000156097	3966	*	6.1	7.49	5.61	5.18	4.92	49	88.3	186.03	173.72	45.44	52.1	45.33	27.15	26.45	34.22	1.39	0.000206	0.0179	-0.49	0.251	0.51	-0.92	0.0478	0.219	1.66	4.72e-05	0.000277	110082542	110091028	+	4	334	TTS	GNAI3	538	promoter-TSS	0.025732	0.449433	NM_006496	Gain	Unchanged	Unchanged	Gain
DAPK3	chr19	3950544	3960652	ENSG00000167657	10109	*	7.32	8.48	8.23	8.29	5.28	139	181.59	345.96	369.64	253.5	345.75	342.93	284.64	46.48	31.31	1.16	0.000207	0.0179	0.9	0.00915	0.121	0.97	0.00343	0.0525	2.24	1.9e-09	3.54e-08	3958450	3971068	-	8	2852	TTS	MIR637	5813	intron	0.039774	0.582806	NR_031672, intron 2 of 2	Gain	Unchanged	Unchanged	Gain
INPP5E	chr9	139321056	139325727	ENSG00000148384	4672	*	5.17	6.78	6.56	6.86	5.03	23	49.14	98.49	121.68	68.56	119.99	128.28	103.35	38.47	26.94	1.61	0.000212	0.0182	1.39	0.00371	0.0829	1.68	0.000119	0.00745	0.63	0.156	0.224	139323070	139334274	-	9	322	TTS	PMPCA	5178	3' UTR	0.031049	0.550417	NM_019892, exon 10 of 10	Gain	Gain	Gain	Unchanged
AC096574.4	chr2	239167927	239174449	ENSG00000225057	6523	*	6.41	7.81	7.84	8.13	5.37	56	114.65	214.65	234.18	213.64	245.5	304.45	257.49	43.27	39.32	1.4	0.000245	0.0206	1.43	0.000298	0.0253	1.72	8.96e-06	0.00138	1.41	0.000397	0.00172	239140324	239164274	+	6	6914	TTS	PER2	18510	intron	0.017329	0.524839	NM_022817, intron 10 of 22	Gain	Gain	Gain	Gain
AMD1	chr6	111195070	111197832	ENSG00000123505	2763	*	6.04	7.33	6.71	6.62	3.91	57	74.77	168.35	153.06	76.53	133.41	113.74	83.2	17.63	12.38	1.29	0.00025	0.0207	0.67	0.104	0.34	0.58	0.137	0.379	2.3	4.33e-07	4.52e-06	111195972	111216916	+	8	479	TSS	RP3-418A9.3	10797	intron	0.073524	0.592324	NM_001287216, intron 1 of 4	Gain	Unchanged	Unchanged	Gain
RNU6-233P	chr17	37708012	37714262	ENSG00000222777	6251	*	4.84	6.55	6.43	6.21	5.31	16	41.3	89.23	97.96	64.57	108.15	87.23	61.31	45.68	33.5	1.71	0.000264	0.0215	1.59	0.00161	0.0546	1.37	0.00613	0.0728	0.64	0.122	0.183	37702356	37702497	-	0	8640	TSS	CDK12	19738	Intergenic	0.008961	0.50144		Gain	Gain	Gain	Unchanged
BIK	chr22	43521256	43527872	ENSG00000100290	6617	*	6.6	7.89	7.39	7.95	5.95	71	122.49	230.64	244.13	142.7	192.61	274.52	220.71	81.74	41.51	1.29	0.000266	0.0215	0.79	0.0414	0.225	1.36	0.000245	0.0116	0.97	0.0191	0.0421	43506753	43525718	+	4	1154	TTS	MCAT	3647	exon	0.022071	0.573307	NM_001197, exon 4 of 5	Gain	Unchanged	Gain	Unchanged
ZC3H8	chr2	112977250	112980368	ENSG00000144161	3119	*	4.65	6.28	6.11	6.56	4.16	23	27.06	94.28	61.22	63.77	74.2	102.62	85.83	16.83	18.93	1.64	0.000284	0.0226	1.46	0.00115	0.0481	1.91	6.5e-06	0.00116	1.3	0.00618	0.017	112969101	113012688	-	8	9708	TTS	FBLN7	33018	intron	0.006096	0.418858	NM_032494, intron 8 of 8	Gain	Gain	Gain	Gain
LTBP2	chr14	74986243	74993219	ENSG00000119681	6977	*	6.11	7.35	7.07	6.15	5.89	69	69.08	177.61	149.23	113.2	156.3	82.95	59.56	64.11	54.61	1.24	0.000282	0.0226	0.96	0.00911	0.121	0.05	0.906	0.958	0.66	0.0733	0.123	74964872	75079034	-	35	24859	TTS	ISCA2	25922	intron	0.012473	0.544008	NM_000428, intron 15 of 35	Gain	Unchanged	Unchanged	Unchanged
BRD3	chr9	136892348	136901628	ENSG00000169925	9281	*	6.5	7.68	7.68	7.76	5.76	89	92.58	191.08	220.41	194.51	215.5	235.18	197.06	62.51	45.87	1.18	0.000287	0.0228	1.18	0.000499	0.0326	1.25	0.00019	0.00991	1.24	0.00068	0.00271	136895426	136933139	-	11	1562	TTS	LINC00094	2800	TTS	0.027266	0.527155	NM_001355256	Gain	Gain	Gain	Gain
RASSF1	chr3	50371881	50376397	ENSG00000068028	4517	*	5.71	7.14	6.05	6.64	5.24	36	68.37	141.41	140.05	58.19	74.2	118.02	81.45	46.48	29.13	1.43	0.000293	0.023	0.34	0.456	0.679	0.93	0.0309	0.175	1.04	0.013	0.0311	50367218	50378343	-	5	4204	TSS	ZMYND10-AS1	4397	promoter-TSS	0.040089	0.555802	NR_109831	Gain	Unchanged	Unchanged	Gain
AGO2	chr8	141606536	141611990	ENSG00000123908	5455	*	6.58	7.83	7.23	7.58	5.97	75	116.79	227.27	228.06	117.98	181.56	237.74	143.63	74.53	50.97	1.25	0.000291	0.023	0.64	0.101	0.336	0.99	0.0108	0.0994	1.04	0.00551	0.0155	141541263	141645718	-	18	36455	TSS	PTK2	58735	intron	0.028791	0.536854	NM_012154, intron 1 of 18	Gain	Unchanged	Unchanged	Gain
AC005262.3	chr19	3116037	3123866	ENSG00000267139	7830	*	5.78	7.15	6.6	7.26	5.12	48	61.96	115.32	168.37	74.14	119.99	168.47	138.38	41.67	27.67	1.37	0.000298	0.0231	0.82	0.0475	0.24	1.48	6e-05	0.00479	1.09	0.00761	0.0202	3118662	3119302	-	1	650	TSS	AC005262.2	1162	intron	0.046627	0.636607	NM_002067, intron 6 of 6	Gain	Unchanged	Gain	Gain
MIR4469	chr8	42749455	42753002	ENSG00000266044	3548	*	5.33	6.74	5.58	5.97	4.65	34	46.29	106.06	107.14	47.03	48.94	74.4	50.8	31.25	18.93	1.41	0.000302	0.0232	0.26	0.578	0.764	0.64	0.15	0.398	1.02	0.0253	0.0526	42751339	42751418	-	0	110	TTS	RNF170	500	promoter-TSS	0.081782	0.594587	NM_032410	Gain	Unchanged	Unchanged	Gain
ENDOV	chr17	78388077	78393334	ENSG00000173818	5258	*	6.46	7.68	6.97	6.97	5.3	73	102.55	199.5	211.22	121.97	129.46	123.15	126.99	47.28	31.31	1.23	0.000303	0.0232	0.52	0.16	0.414	0.51	0.162	0.414	1.55	6.86e-05	0.000383	78388966	78411881	+	9	1740	TSS	CTD-2047H16.4	1788	intron	0.043189	0.547651	NR_148041, intron 1 of 6	Gain	Unchanged	Unchanged	Gain
RP11-599B13.6	chr17	8043543	8060568	ENSG00000263620	17026	*	8.63	9.96	8.93	9.32	6.35	265	526.98	905.73	1082.14	444.03	531.26	719.22	555.27	79.34	83.74	1.33	0.00031	0.0233	0.3	0.437	0.665	0.69	0.0729	0.276	2.43	4.11e-11	1.13e-09	8054133	8066293	-	4	2078	TTS	PER1	4682	exon	0.030486	0.589251	NM_002616, exon 8 of 23	Gain	Unchanged	Unchanged	Gain
CLHC1	chr2	55458554	55462034	ENSG00000162994	3481	*	6.4	7.58	7.5	6.76	4.61	81	88.3	191.08	192.86	191.32	169.72	108.61	108.6	24.84	24.03	1.18	0.000307	0.0233	1.09	0.00151	0.0535	0.36	0.312	0.575	2.09	1.55e-07	1.81e-06	55401926	55459410	-	12	884	TSS	RPS27A	1256	promoter-TSS	0.028456	0.474425	NR_148542	Gain	Gain	Unchanged	Gain
RP11-357H14.17	chr17	46707859	46720954	ENSG00000272763	13096	*	7.34	8.59	8.26	8.13	6.44	116	207.23	387.21	381.12	281.41	329.96	340.37	219.83	95.36	78.64	1.25	0.000311	0.0233	0.92	0.0129	0.139	0.79	0.0393	0.199	1.34	0.000129	0.000657	46713284	46724385	-	2	1122	TTS	HOXB-AS4	2112	Intergenic	0.027494	0.523711		Gain	Unchanged	Unchanged	Gain
RP11-438D8.2	chr3	141089604	141092092	ENSG00000249417	2489	*	4.77	6.4	5.9	5.39	3.7	21	33.47	103.54	65.82	64.57	55.26	41.9	42.04	12.82	13.11	1.64	0.000326	0.0235	1.14	0.0162	0.155	0.62	0.221	0.481	1.65	0.00122	0.00447	140986194	141085979	-	2	4869	TSS	ZBTB38	47794	intron	0.00764	0.452974	NM_001080412, intron 3 of 7	Gain	Unchanged	Unchanged	Gain
FNDC3B	chr3	171756683	171762540	ENSG00000075420	5858	*	6.04	7.52	6.71	6.87	5.18	38	93.29	175.93	192.09	82.11	127.09	128.28	105.97	41.67	30.58	1.49	0.000324	0.0235	0.67	0.149	0.401	0.84	0.0592	0.247	1.26	0.00331	0.0102	171758343	172119455	+	25	1268	TSS	TMEM212	103106	intron	0.039788	0.488817	NM_001135095, intron 1 of 25	Gain	Unchanged	Unchanged	Gain
OGFOD3	chr17	80381018	80385646	ENSG00000181396	4629	*	5.83	7.28	6.92	7.25	5.5	37	76.91	145.62	164.54	83.7	158.67	173.6	130.5	47.28	42.96	1.45	0.000318	0.0235	1.09	0.0178	0.161	1.42	0.000673	0.0211	0.9	0.0223	0.0477	80347098	80376513	-	9	6819	TSS	HEXDC	7139	intron	0.022477	0.527442	NM_173620, intron 3 of 11	Gain	Unchanged	Gain	Unchanged
C11orf24	chr11	68038076	68041120	ENSG00000171067	3045	*	5.78	7.22	5.86	5.13	4.3	39	71.21	124.58	173.72	48.63	67.89	43.61	26.27	24.84	14.56	1.44	0.000327	0.0235	0.08	0.877	0.939	-0.66	0.172	0.426	1.75	0.000187	0.000907	68028802	68039430	-	4	168	TSS	LRP5	40478	promoter-TSS	0.04305	0.550263	NM_022338	Gain	Unchanged	Unchanged	Gain
ANP32A	chr15	69074356	69077164	ENSG00000140350	2809	*	5.31	6.68	5.69	7.02	4.79	40	39.17	101.01	104.08	45.44	57.63	142.82	116.48	30.45	24.76	1.37	0.000324	0.0235	0.38	0.388	0.629	1.71	6.94e-06	0.0012	1.15	0.0067	0.0181	69070873	69113234	-	6	4887	TTS	MIR4312	18428	intron	0.014606	0.513889	NM_006305, intron 4 of 6	Gain	Unchanged	Gain	Gain
RPS29	chr14	50049471	50053639	ENSG00000213741	4169	*	6.15	7.58	7.71	7.33	4.92	49	93.29	228.96	153.06	232.78	187.08	148.8	172.54	25.64	34.95	1.42	0.000327	0.0235	1.56	7.13e-05	0.0117	1.18	0.00289	0.0473	1.73	2.73e-05	0.000172	50050296	50065408	-	2	1259	TTS	RN7SL1	1741	intron	0.034077	0.464731	NM_001032, intron 2 of 2	Gain	Gain	Gain	Gain
SKIL	chr3	170073511	170077153	ENSG00000136603	3643	*	7.28	8.5	7.54	7.54	4.7	118	192.99	329.13	396.43	169.8	202.08	191.56	179.54	28.85	23.3	1.22	0.000331	0.0237	0.26	0.486	0.701	0.25	0.482	0.715	2.68	2.3e-11	6.81e-10	170077410	170114623	+	7	2078	TSS	RP11-543D10.2	3583	promoter-TSS	0.071134	0.602416	NM_001145098	Gain	Unchanged	Unchanged	Gain
ORAOV1	chr11	69454821	69471105	ENSG00000149716	16285	*	9.28	10.51	10.15	10.49	7.03	481	763.41	1362.8	1552.04	978.94	1293.8	1648.81	1234.03	143.45	117.24	1.23	0.000352	0.0249	0.87	0.0195	0.167	1.21	0.000958	0.0254	2.37	5.94e-12	2.03e-10	69469126	69490112	-	5	6163	TTS	CCND1	6279	intron	0.043972	0.586957	NM_053056, intron 4 of 4	Gain	Unchanged	Gain	Gain
CTD-2538G9.5	chr19	16959165	16965664	ENSG00000268743	6500	*	5.44	7.06	6.75	7.02	4.78	23	64.09	117	150	81.31	134.2	150.51	109.48	28.05	26.94	1.62	0.000355	0.025	1.31	0.00759	0.113	1.58	0.000668	0.021	1.03	0.0257	0.0534	16954835	16957284	+	1	5130	TTS	SIN3B	22204	intron	0.022161	0.506539	NM_001297595, intron 6 of 18	Gain	Unchanged	Gain	Gain
PLXNA1	chr3	126717213	126737530	ENSG00000114554	20318	*	7.87	9.13	8.58	9.65	7.35	168	299.1	479.8	637.5	298.15	469.69	918.48	691.9	193.93	132.53	1.26	0.000369	0.0256	0.72	0.065	0.274	1.79	1.26e-06	0.000403	0.9	0.0105	0.0261	126707436	126756235	+	30	19936	TSS	CHCHD6	48122	intron	0.027121	0.627996	NM_032242, intron 8 of 30	Gain	Unchanged	Gain	Unchanged
GPS1	chr17	80003611	80025872	ENSG00000169727	22262	*	10.19	11.64	11.62	11.76	8.08	821	1521.12	2744.12	3632.14	2444.96	3834.84	3783.37	3154.7	326.96	213.35	1.44	0.000367	0.0256	1.42	0.0014	0.0517	1.57	0.000148	0.00855	2.24	8.66e-09	1.39e-07	80009740	80015346	+	13	604	TTS	DUS1L	640	TTS	0.043935	0.632137	NM_022156	Gain	Gain	Gain	Gain
BANP	chr16	88050507	88055599	ENSG00000172530	5093	*	5.68	7.27	6.43	6.56	4.9	26	76.2	143.94	163.78	68.56	104.2	112.89	76.2	32.06	27.67	1.59	0.000374	0.0258	0.76	0.13	0.378	0.89	0.07	0.27	1.08	0.0205	0.0446	87985039	88110924	+	13	57871	TTS	RP11-863P13.5	59713	intron	0.041446	0.598782	NM_079837, intron 6 of 12	Gain	Unchanged	Unchanged	Gain
SERINC2	chr1	31906142	31910296	ENSG00000168528	4155	*	5.35	6.75	6.83	6	4.79	33	48.43	112.8	102.55	102.04	125.51	78.68	49.05	32.06	23.3	1.4	0.000379	0.0259	1.48	0.000248	0.0225	0.65	0.154	0.403	0.97	0.026	0.0538	31882411	31907524	+	10	695	TTS	AC114494.1	5605	TTS	0.017337	0.571497	NM_018565	Gain	Gain	Unchanged	Unchanged
PRAME	chr22	22888865	22894546	ENSG00000185686	5682	*	7.2	8.31	8.09	8.73	5.39	138	156.67	341.75	290.82	252.71	292.86	428.45	420.39	44.08	40.05	1.1	0.000377	0.0259	0.89	0.00677	0.108	1.53	1.28e-06	0.000405	2.02	1.27e-08	1.97e-07	22890122	22901768	-	5	1584	TTS	LL22NC03-63E9.3	10044	intron	0.008627	0.481781	NM_206956, intron 5 of 5	Gain	Unchanged	Gain	Gain
SPAG4	chr20	34202108	34209654	ENSG00000061656	7547	*	7.18	8.45	8.25	8.44	5.58	101	188.72	319.03	378.83	257.49	352.07	365.17	329.31	60.9	34.95	1.27	0.000396	0.0265	1.07	0.00528	0.0977	1.26	0.000602	0.0199	1.8	1.02e-05	7.25e-05	34203813	34208971	+	11	2068	TSS	CPNE1	8086	intron	0.039761	0.568381	NM_003116, intron 4 of 11	Gain	Gain	Gain	Gain
ZXDC	chr3	126191652	126195300	ENSG00000070476	3649	*	6.09	7.46	7.08	6.65	5.34	49	87.59	148.15	204.34	106.82	164.19	96.64	104.22	48.08	32.77	1.37	0.000396	0.0265	0.99	0.0174	0.159	0.56	0.172	0.426	1.13	0.00578	0.0161	126156443	126194762	-	9	1286	TSS	UROC1	6647	intron	0.073485	0.608553	NR_104249, intron 1 of 8	Gain	Unchanged	Unchanged	Gain
NSMF	chr9	140341345	140351959	ENSG00000165802	10615	*	7.4	8.64	8.41	9.04	5.81	141	196.55	304.72	490.56	266.26	412.06	612.32	437.91	68.92	42.96	1.24	0.000391	0.0265	1.01	0.00553	0.0991	1.64	2.11e-06	0.000561	1.77	2.16e-06	1.86e-05	140342024	140353786	-	15	4628	TTS	PNPLA7	7752	intron	0.03524	0.633409	NM_001130970, intron 11 of 14	Gain	Gain	Gain	Gain
STK11	chr19	1216049	1229404	ENSG00000118046	13356	*	7.13	8.45	8.42	9.06	6.34	104	175.19	261.79	436.99	279.81	405.74	556.73	512.35	96.97	64.81	1.32	0.000391	0.0265	1.3	0.000568	0.0351	1.94	3.46e-08	3.14e-05	1.04	0.0055	0.0155	1189405	1219385	+	9	3342	TTS	C19orf26	5558	intron	0.052044	0.647098	NM_000455, intron 7 of 9	Gain	Gain	Gain	Gain
BSG	chr19	578450	585481	ENSG00000172270	7032	*	6.18	7.55	7.39	7.9	5.21	57	87.59	138.89	235.71	136.32	199.71	265.11	211.07	47.28	26.94	1.37	0.000406	0.0269	1.22	0.00174	0.0569	1.72	2.2e-06	0.00057	1.22	0.0035	0.0107	571296	583493	+	8	1528	TTS	HCN2	7926	intron	0.045377	0.643863	NM_198591, intron 4 of 6	Gain	Gain	Gain	Gain
HAUS8	chr19	17183579	17187907	ENSG00000131351	4329	*	5.94	7.19	6.52	6.23	4.52	55	67.65	139.73	151.53	84.5	99.46	75.26	75.32	33.66	12.38	1.25	0.000412	0.0271	0.58	0.131	0.379	0.3	0.452	0.693	1.65	0.00053	0.0022	17160538	17186423	-	10	680	TSS	MYO9B	847	promoter-TSS	0.047608	0.58341	NM_001130065	Gain	Unchanged	Unchanged	Gain
SH2D3A	chr19	6759004	6764400	ENSG00000125731	5397	*	5.29	6.64	7.03	6.66	4.3	39	39.17	96.8	103.32	136.32	125.51	113.74	88.46	16.83	22.57	1.36	0.000422	0.0273	1.74	4.44e-06	0.00241	1.37	0.000541	0.0186	1.26	0.0071	0.019	6752308	6767599	-	9	5897	TSS	TRIP10	10191	intron	0.016497	0.506857	NM_005490, intron 2 of 9	Gain	Gain	Gain	Gain
TST	chr22	37406968	37416787	ENSG00000128311	9820	*	7.71	8.91	8.87	8.65	6.34	156	262.07	430.14	534.18	409.75	528.1	435.29	370.47	83.34	78.64	1.21	0.00042	0.0273	1.17	0.00137	0.0516	0.95	0.0074	0.0807	1.69	8.85e-07	8.51e-06	37406899	37415568	-	2	3690	TSS	MPST	3798	intron	0.033815	0.566656	NM_003312, intron 2 of 2	Gain	Gain	Unchanged	Gain
MYH9	chr22	36763679	36769752	ENSG00000100345	6074	*	5.23	6.68	5.73	6.47	5.39	28	47	98.49	106.38	49.43	56.84	115.45	62.18	39.27	44.42	1.45	0.000418	0.0273	0.5	0.287	0.542	1.24	0.00695	0.0779	0.73	0.0655	0.112	36677326	36784063	-	40	17348	TSS	RP4-633O19__A.1	17954	intron	0.016304	0.509468	NM_002473, intron 1 of 40	Gain	Unchanged	Gain	Unchanged
TCP10	chr6	167833900	167838328	ENSG00000203690	4429	*	5.97	7.31	6.54	7.06	4.46	45	80.47	152.36	164.54	70.95	115.25	158.21	108.6	26.45	17.48	1.34	0.00044	0.0283	0.57	0.195	0.451	1.09	0.00788	0.0835	1.72	0.000131	0.000665	167770520	167797998	-	8	38116	TSS	TTLL2	63123	Intergenic	0.054213	0.647019		Gain	Unchanged	Gain	Gain
AF038458.3	chr19	36435805	36440176	ENSG00000267786	4372	*	5	6.47	6.34	6.6	4.86	27	37.03	77.44	99.49	54.21	108.15	115.45	78.82	29.65	28.4	1.47	0.000479	0.0285	1.34	0.00448	0.0897	1.6	0.000179	0.00964	0.6	0.175	0.244	36438016	36450094	+	3	26	TSS	LRFN3	1322	promoter-TSS	0.021739	0.559826	NR_136525	Gain	Gain	Gain	Unchanged
RP11-77H9.8	chr16	9053398	9059573	ENSG00000260979	6176	*	6.24	7.53	6.36	7.19	5.44	56	95.43	170.03	198.98	64.57	99.46	165.05	126.99	56.1	30.58	1.29	0.000478	0.0285	0.12	0.799	0.897	0.95	0.015	0.119	1.22	0.0032	0.0099	9056562	9060847	+	1	76	TSS	USP7	856	intron	0.058309	0.556275	NM_003470, intron 1 of 30	Gain	Unchanged	Unchanged	Gain
HOXA5	chr7	27181864	27185874	ENSG00000106004	4011	*	4.58	6.17	7.13	6.43	5.49	20	27.77	62.29	81.89	136.32	142.88	88.08	84.08	48.08	41.51	1.59	0.000455	0.0285	2.55	4.82e-10	4.88e-06	1.85	2.27e-05	0.00268	0.06	0.877	0.9	27180670	27183287	-	1	582	TSS	HOXA6	1411	promoter-TSS	0.064605	0.588529	NM_019102	Gain	Gain	Gain	Unchanged
ARRDC2	chr19	18117125	18123069	ENSG00000105643	5945	*	5.77	7.34	6.14	7.02	4.58	27	81.9	154.88	168.37	45.44	95.52	158.21	100.72	28.05	19.66	1.57	0.000463	0.0285	0.37	0.68	0.829	1.25	0.119	0.353	1.43	0.00351	0.0107	18111940	18124911	+	7	4814	TTS	KCNN1	9208	intron	0.045936	0.58395	NM_001286826, intron 3 of 7	Gain	Unchanged	Unchanged	Gain
WDR65	chr1	43636831	43639254	ENSG00000243710	2424	*	4.83	6.4	5.62	5.02	4.33	19	37.74	87.54	81.89	37.47	60.78	36.77	28.03	19.23	21.12	1.58	0.000455	0.0285	0.79	0.133	0.381	0.19	0.747	0.882	1.08	0.0226	0.0483	43637819	43720029	+	22	224	TSS	EBNA1BP2	762	promoter-TSS	0.036746	0.489063	NR_106791	Gain	Unchanged	Unchanged	Gain
BAI1	chr8	143620757	143629006	ENSG00000181790	8250	*	7.48	8.79	8.73	9.01	7.16	117	239.28	373.74	510.46	329.24	521	609.75	423.02	150.66	136.17	1.31	0.000479	0.0285	1.25	0.00201	0.0614	1.54	8.94e-05	0.00628	0.65	0.0639	0.11	143530790	143626370	+	30	1488	TTS	MROH4P	23738	intron	0.035645	0.642866	NM_001702, intron 29 of 30	Gain	Gain	Gain	Unchanged
INF2	chr14	105151825	105160381	ENSG00000203485	8557	*	6.13	7.45	6.75	7.5	5.64	49	91.15	175.09	175.25	95.66	119.2	199.26	162.03	56.9	42.96	1.32	0.000474	0.0285	0.62	0.138	0.389	1.37	0.000466	0.0169	0.82	0.0387	0.074	105155942	105185942	+	22	161	TSS	RP11-982M15.5	324	intron	0.033197	0.633707	NM_001031714, intron 1 of 21	Gain	Unchanged	Gain	Unchanged
UBE2D1	chr10	60093335	60095941	ENSG00000072401	2607	*	5.04	6.48	5.81	5.7	4.44	28	37.74	95.12	83.42	45.44	67.1	49.6	54.3	22.44	21.12	1.44	0.000473	0.0285	0.78	0.0976	0.33	0.66	0.152	0.4	1.2	0.00729	0.0194	60094734	60130513	+	6	96	TSS	RP11-179B15.6	7848	promoter-TSS	0.03762	0.510361	NM_003338	Gain	Unchanged	Unchanged	Gain
MKNK2	chr19	2037169	2051972	ENSG00000099875	14804	*	7.49	8.69	8.64	8.67	6.36	137	222.9	361.11	465.31	330.83	465.74	457.53	358.21	103.38	60.44	1.2	0.000451	0.0285	1.15	0.00183	0.0586	1.18	0.000864	0.0241	1.41	0.000174	0.000852	2037480	2051243	-	13	6672	TSS	BTBD2	9690	intron	0.041548	0.6421	NM_017572, intron 5 of 13	Gain	Gain	Gain	Gain
CLPB	chr11	72139663	72147573	ENSG00000162129	7911	*	6.18	7.42	6.84	6.76	5.63	60	85.46	172.56	169.13	114	115.25	121.44	95.46	56.1	42.96	1.23	0.000447	0.0285	0.66	0.0827	0.307	0.58	0.134	0.374	1.06	0.00463	0.0135	72003468	72145692	-	17	2074	TSS	RP11-7N14.1	20495	intron	0.020483	0.494311	NM_030813, intron 1 of 16	Gain	Unchanged	Unchanged	Gain
POLR3E	chr16	22307879	22313074	ENSG00000058600	5196	*	7.66	8.78	8.18	8.39	4.55	163	240.7	430.14	446.17	246.33	333.12	350.63	320.55	28.05	18.93	1.12	0.000476	0.0285	0.52	0.142	0.394	0.73	0.0294	0.17	3.24	1.77e-16	1.74e-14	22308729	22346424	+	20	1748	TSS	RP11-141O15.1	10418	intron	0.0335	0.511646	NM_001258035, intron 1 of 19	Gain	Unchanged	Unchanged	Gain
CTBP2	chr10	126847042	126851646	ENSG00000175029	4605	*	5.97	7.4	6.67	7.02	5.01	38	87.59	173.4	165.31	79.72	123.93	150.51	108.6	34.46	29.86	1.43	0.000455	0.0285	0.7	0.129	0.377	1.04	0.0167	0.126	1.23	0.00483	0.0139	126676420	126849082	-	10	262	TSS	MRPS21P6	5901	promoter-TSS	0.098631	0.673328	NM_001321012	Gain	Unchanged	Unchanged	Gain
PTTG1IP	chr21	46291130	46296394	ENSG00000183255	5265	*	5.7	7.27	6.22	6.63	5.69	26	77.62	151.52	156.12	72.54	76.57	111.17	87.58	62.51	40.78	1.57	0.000458	0.0285	0.53	0.296	0.551	0.94	0.051	0.227	0.49	0.252	0.326	46269499	46293752	-	5	10	TSS	ITGB2	12105	promoter-TSS	0.057192	0.56288	NM_004339	Gain	Unchanged	Unchanged	Unchanged
APLP2	chr11	129937796	129941094	ENSG00000084234	3299	*	5.15	6.62	5.74	5.58	4.17	26	44.86	88.38	108.67	45.44	61.57	62.43	33.28	18.43	17.48	1.48	0.000469	0.0285	0.59	0.218	0.476	0.43	0.401	0.652	1.19	0.0156	0.0359	129939800	130014699	+	17	355	TSS	AP003041.2	2610	promoter-TSS	0.07795	0.633414	NM_001142276	Gain	Unchanged	Unchanged	Gain
PARK7	chr1	8042492	8049134	ENSG00000116288	6643	*	5.8	7.17	6.68	7.17	4.41	39	72.64	143.1	144.64	89.28	115.25	161.63	126.12	20.03	22.57	1.37	0.000472	0.0285	0.87	0.0396	0.223	1.37	0.000737	0.0221	1.78	5.36e-05	0.000309	8014350	8045112	+	6	701	TTS	ERRFI1	18650	TTS	0.017618	0.48931	NM_001123377	Gain	Unchanged	Gain	Gain
RPLP1	chr15	69744234	69749882	ENSG00000137818	5649	*	7.9	8.99	8.97	8.36	5.39	204	272.75	477.28	536.48	515.78	487.84	295.04	363.46	42.47	41.51	1.09	0.000446	0.0285	1.07	0.00112	0.0477	0.47	0.16	0.41	2.7	9.15e-15	6.1e-13	69745122	69748255	+	3	1197	TTS	RP11-253M7.4	3802	intron	0.029396	0.470963	NM_001003, intron 2 of 3	Gain	Gain	Unchanged	Gain
ZNF696	chr8	144371214	144383370	ENSG00000185730	12157	*	8.59	9.8	9.88	10.11	7.28	279	494.22	855.22	931.38	806.75	1082.25	1216.94	993.18	190.73	119.42	1.21	0.000486	0.0288	1.29	0.000701	0.0376	1.52	3.84e-05	0.00365	1.6	1.07e-05	7.54e-05	144373558	144380231	+	3	2939	TTS	RP13-582O9.7	4501	intron	0.04492	0.563425	NM_030895, intron 2 of 2	Gain	Gain	Gain	Gain
AP002954.3	chr11	118489481	118506983	ENSG00000255176	17503	*	8.15	9.24	8.65	8.79	6.38	234	332.57	584.18	624.49	392.21	409.69	512.26	373.97	95.36	71.36	1.09	0.0005	0.0289	0.5	0.135	0.384	0.65	0.0603	0.249	1.95	1.28e-08	1.97e-07	118507337	118508815	+	1	9105	TSS	PHLDB1	21078	exon	0.017085	0.554965	NM_015157, exon 7 of 24	Gain	Unchanged	Unchanged	Gain
MIR4669	chr9	137254280	137260694	ENSG00000263897	6415	*	5.01	6.54	5.78	6.84	5.76	24	40.59	74.92	111.73	51.82	58.41	131.7	97.22	60.1	48.06	1.53	0.000495	0.0289	0.77	0.105	0.342	1.83	1.77e-05	0.0023	0.05	0.888	0.909	137271256	137271318	+	0	13769	TSS	RXRA	39062	intron	0.028692	0.62348	NM_002957, intron 1 of 9	Gain	Unchanged	Gain	Unchanged
SIM2	chr21	38069385	38074735	ENSG00000159263	5351	*	5.83	7.28	6.88	6.87	4.75	34	79.76	143.1	168.37	92.47	142.88	146.24	87.58	31.25	22.57	1.45	0.0005	0.0289	1.05	0.0214	0.173	1.04	0.0234	0.151	1.31	0.00438	0.0128	38071433	38122218	+	10	627	TSS	AP000697.6	988	exon	0.075715	0.651402	NM_005069, exon 1 of 11	Gain	Unchanged	Unchanged	Gain
GAK	chr4	918831	922593	ENSG00000178950	3763	*	4.83	6.32	5.16	5.78	4.67	25	32.05	71.55	88.78	35.08	36.31	67.56	42.04	30.45	20.39	1.49	0.000502	0.0289	0.32	0.527	0.729	0.94	0.0502	0.226	0.59	0.205	0.278	843065	926161	-	27	5449	TSS	TMEM175	5462	intron	0.040947	0.602605	NM_005255, intron 1 of 27	Gain	Unchanged	Unchanged	Unchanged
RNF168	chr3	196193070	196198630	ENSG00000163961	5561	*	5.88	7.17	7.17	7.45	4.81	48	69.79	129.63	158.42	119.58	168.14	190.71	159.4	31.25	24.76	1.29	0.000495	0.0289	1.29	0.000971	0.0452	1.57	2.1e-05	0.00256	1.56	0.000135	0.000685	196195653	196230639	-	5	197	TTS	CTD-2002J20.1	5821	3' UTR	0.01619	0.435971	NM_152617, exon 6 of 6	Gain	Gain	Gain	Gain
TMEM190	chr19	55879061	55892431	ENSG00000160472	13371	*	8.25	9.45	9.3	9.57	6.76	222	385.27	622.06	776.79	519.76	743.6	838.09	682.26	133.83	83.01	1.2	0.00051	0.0291	1.06	0.00509	0.0961	1.32	0.000237	0.0114	1.72	2.78e-06	2.33e-05	55888203	55889612	+	4	2457	TSS	CTD-2105E13.15	3200	Intergenic	0.032688	0.632311		Gain	Gain	Gain	Gain
SFT2D1	chr6	166750003	166757335	ENSG00000198818	7333	*	7.11	8.31	6.87	7.06	5.44	102	175.19	316.5	319.13	113.2	120.78	153.93	112.98	46.48	40.05	1.2	0.000511	0.0291	-0.24	0.507	0.715	-0.05	0.875	0.944	1.94	2.83e-07	3.09e-06	166733215	166756079	-	8	2410	TSS	HNRNPA1P49	4710	intron	0.022507	0.495908	NR_130113, intron 1 of 6	Gain	Unchanged	Unchanged	Gain
RP11-439L18.2	chr6	143264787	143268964	ENSG00000224460	4178	*	6.86	8.22	7.43	7.83	5.07	70	163.08	281.99	314.54	145.09	200.5	244.58	210.2	40.87	26.21	1.36	0.00052	0.0293	0.57	0.184	0.44	0.96	0.018	0.131	1.93	1.38e-05	9.4e-05	143267183	143277835	-	1	308	TTS	HIVEP2	538	promoter-TSS	0.078784	0.640651	NM_006734	Gain	Unchanged	Unchanged	Gain
RASGEF1C	chr5	179554313	179558634	ENSG00000146090	4322	*	4.66	6.29	5.81	6.19	4.86	20	30.62	58.08	97.96	40.66	71.83	97.49	48.17	29.65	28.4	1.62	0.000521	0.0293	1.15	0.023	0.178	1.52	0.0021	0.0394	0.32	0.472	0.541	179527794	179636153	-	13	28680	TTS	RP11-39H3.1	42436	intron	0.030324	0.616755	NM_175062, intron 4 of 13	Gain	Unchanged	Gain	Unchanged
YWHAG	chr7	75987146	75989679	ENSG00000170027	2534	*	4.99	6.44	6.19	6.08	4.23	35	28.49	71.55	102.55	59.79	86.04	78.68	56.93	20.03	17.48	1.46	0.00052	0.0293	1.2	0.00625	0.105	1.09	0.0124	0.107	1.15	0.0175	0.0394	75956115	75988348	-	1	64	TSS	AC005522.6	2672	promoter-TSS	0.063981	0.600869	NM_012479	Gain	Unchanged	Unchanged	Gain
FOS	chr14	75744478	75748741	ENSG00000170345	4264	*	7.53	10.03	7.48	6.8	5.24	97	272.75	873.74	1213.77	175.38	180.77	145.38	77.95	38.47	37.14	2.5	0.000526	0.0294	-0.05	0.891	0.944	-0.73	0.372	0.627	2.43	0.000154	0.000769	75745476	75748933	+	3	1134	TSS	RP11-293M10.2	8046	exon	0.043876	0.561107	NM_005252, exon 2 of 4	Gain	Unchanged	Unchanged	Gain
RP11-611L7.1	chr7	6690875	6696638	ENSG00000260054	5764	*	8.39	9.48	8.9	9.66	6.84	306	364.61	605.22	823.47	350.76	602.3	909.92	705.03	131.43	97.58	1.09	0.000528	0.0294	0.51	0.163	0.417	1.27	9.95e-05	0.00671	1.71	1.92e-07	2.19e-06	6694494	6696063	+	0	738	TSS	ZNF316	1162	exon	0.081742	0.655041	NM_001278559, exon 9 of 9	Gain	Unchanged	Gain	Gain
RP3-465N24.6	chr1	25570881	25574565	ENSG00000272432	3685	*	5.99	7.22	6.78	6.52	4.14	57	70.5	137.21	160.71	92.47	127.09	105.19	77.95	19.23	16.02	1.22	0.00054	0.0299	0.78	0.0425	0.227	0.52	0.18	0.435	2.22	2.79e-07	3.05e-06	25574327	25574812	+	0	1604	TSS	C1orf63	3977	intron	0.053217	0.509501	NM_020317, intron 2 of 4	Gain	Unchanged	Unchanged	Gain
AC012360.6	chr2	106014540	106017174	ENSG00000238273	2635	*	7.28	8.34	7.77	7.11	4.3	151	159.52	297.14	350.51	184.15	253.39	133.41	142.76	24.84	14.56	1.06	0.000541	0.0299	0.49	0.146	0.398	-0.17	0.606	0.798	3.09	2.01e-14	1.22e-12	105979494	105995296	+	3	20561	TTS	FHL2	38575	promoter-TSS	0.050893	0.559605	NM_201555	Gain	Unchanged	Unchanged	Gain
AC112721.1	chr2	238333318	238337122	ENSG00000222022	3805	*	4.57	6.25	5.56	5.28	3.68	14	33.47	82.49	69.64	56.6	37.89	35.92	42.04	17.63	8.01	1.68	0.000547	0.0301	0.99	0.0726	0.288	0.72	0.208	0.467	1.44	0.0108	0.0267	238330062	238333919	-	2	1301	TSS	AC112721.2	2342	Intergenic	0.009466	0.430599		Gain	Unchanged	Unchanged	Gain
SSBP3-AS1	chr1	54706713	54710920	ENSG00000198711	4208	*	5.05	6.51	5.76	6.57	4.15	25	41.3	97.64	84.95	45.44	63.15	108.61	81.45	20.84	14.56	1.46	0.000567	0.0309	0.71	0.14	0.391	1.52	0.000444	0.0163	1.35	0.00544	0.0154	54703709	54704736	+	0	4080	TTS	SSBP3	16512	intron	0.019496	0.536487	NM_001009955, intron 9 of 16	Gain	Unchanged	Gain	Gain
FAM120A	chr9	96211926	96216245	ENSG00000048828	4320	*	6.05	7.32	7.39	7.06	5.11	51	81.9	152.36	167.6	163.42	172.88	154.79	112.1	40.07	29.13	1.27	0.000567	0.0309	1.34	0.000378	0.028	1.01	0.0106	0.0982	1.28	0.00177	0.00606	96214003	96328389	+	18	82	TSS	FAM120AOS	1788	promoter-TSS	0.066466	0.577217	NM_001322224	Gain	Gain	Gain	Gain
PWWP2B	chr10	134206390	134211206	ENSG00000171813	4817	*	5.63	7.04	6.97	6.95	4.84	34	64.8	110.27	153.83	100.44	149.98	127.42	119.11	29.65	27.67	1.42	0.000576	0.0312	1.34	0.00179	0.0581	1.32	0.0013	0.0298	1.07	0.0145	0.0338	134210671	134231367	+	2	1873	TSS	LRRC27	13788	Intergenic	0.062513	0.67255		Gain	Gain	Gain	Gain
TRIO	chr5	14142454	14147841	ENSG00000038382	5388	*	7.41	8.65	8.17	8.14	5.97	114	225.75	380.47	425.51	230.39	346.54	334.38	229.46	69.72	55.34	1.25	0.000574	0.0312	0.76	0.0561	0.257	0.73	0.0626	0.254	1.6	3.29e-05	0.000202	14143810	14510313	+	57	1338	TSS	DNAH5	200496	intron	0.066283	0.593837	NR_134469, intron 1 of 56	Gain	Unchanged	Unchanged	Gain
NAT8L	chr4	2063969	2078507	ENSG00000185818	14539	*	7.6	8.68	8.77	8.75	6.77	166	220.76	373.74	443.88	326.84	545.47	506.27	352.08	132.23	86.65	1.08	0.000602	0.0323	1.17	0.00139	0.0517	1.15	0.000819	0.0235	1.1	0.00152	0.00536	2061238	2070815	+	2	423	TTS	POLN	2406	TTS	0.030543	0.640322	NM_178557	Gain	Gain	Gain	Gain
BTG1	chr12	92537314	92540600	ENSG00000133639	3287	*	6.44	7.6	6.93	6.84	3.91	75	98.99	191.08	195.92	104.43	138.93	109.46	119.11	19.23	10.92	1.15	0.000603	0.0323	0.48	0.197	0.453	0.39	0.282	0.544	2.61	7.26e-09	1.19e-07	92536285	92539673	-	1	716	TSS	RP11-796E2.4	999	promoter-TSS	0.056317	0.54504	NR_135037	Gain	Unchanged	Unchanged	Gain
AC004702.2	chr17	20058654	20064002	ENSG00000263494	5349	*	5.73	7.1	6.78	5.87	4.85	36	70.5	130.47	144.64	120.37	99.46	59.86	56.93	26.45	31.31	1.37	0.00063	0.0325	1.05	0.0137	0.144	0.13	0.787	0.902	1.48	0.000387	0.00168	20088394	20226286	+	1	27066	TSS	SPECC1	148653	intron	0.033477	0.50374	NM_001033554, intron 1 of 5	Gain	Unchanged	Unchanged	Gain
C1orf172	chr1	27270136	27280067	ENSG00000175707	9932	*	7.33	8.53	8.15	8.55	5.85	113	208.66	349.33	391.84	255.9	311.81	391.68	358.21	70.52	45.15	1.2	0.000649	0.0325	0.82	0.0296	0.197	1.22	0.000815	0.0234	1.8	2.53e-06	2.14e-05	27276052	27286897	-	3	950	TTS	NUDC	5834	TTS	0.018228	0.526332	NM_152365	Gain	Unchanged	Gain	Gain
RP11-410N8.3	chr20	31128788	31135561	ENSG00000233293	6774	*	5.65	6.94	6.27	7.07	5.38	41	59.11	117.85	127.04	71.75	82.89	146.24	121.74	45.68	37.87	1.29	0.000642	0.0325	0.63	0.131	0.379	1.42	0.000215	0.0108	0.8	0.0411	0.0776	31148894	31161690	+	2	16720	TSS	C20orf112	40456	intron	0.016243	0.524288	NM_001256798, intron 1 of 10	Gain	Unchanged	Gain	Unchanged
CTB-58E17.2	chr17	36737760	36744095	ENSG00000265130	6336	*	5.08	6.53	6.7	6.84	5.64	25	42.73	96.8	88.01	88.49	119.2	131.7	97.22	64.11	35.68	1.45	0.000633	0.0325	1.62	0.00019	0.0195	1.76	3.46e-05	0.00349	0.32	0.443	0.515	36757301	36758954	+	1	16374	TSS	SRCIN1	21256	intron	0.015156	0.566219	NM_025248, intron 1 of 18	Gain	Gain	Gain	Unchanged
KCNK12	chr2	47796652	47800499	ENSG00000184261	3848	*	5.02	6.47	5.87	6.32	5.61	25	39.88	85.86	91.07	41.45	75.78	93.22	66.56	63.31	34.22	1.45	0.000615	0.0325	0.85	0.0843	0.309	1.3	0.00353	0.0532	-0.03	0.959	0.967	47743719	47798078	-	1	498	TSS	AC138655.1	1024	Intergenic	0.075923	0.6379		Gain	Unchanged	Gain	Unchanged
SULF2	chr20	46421487	46424189	ENSG00000196562	2703	*	4.64	6.13	6.11	5.56	4.51	25	24.92	69.87	70.41	58.19	79.73	56.44	37.66	27.25	18.2	1.49	0.000638	0.0325	1.47	0.00125	0.0491	0.91	0.0633	0.256	0.58	0.238	0.312	46285655	46415330	-	20	7508	TSS	RNU7-173P	32874	Intergenic	0.014809	0.511473		Gain	Gain	Unchanged	Unchanged
MIR4635	chr5	1073190	1083701	ENSG00000263834	10512	*	7.36	8.56	8.2	8.37	6.65	121	207.94	331.65	420.92	224.81	363.91	381.42	280.26	114.6	85.92	1.19	0.000623	0.0325	0.84	0.0311	0.202	1.01	0.00605	0.0723	1.01	0.00467	0.0135	1063010	1063089	-	0	15356	TSS	SLC12A7	27948	intron	0.044339	0.63543	NM_006598, intron 11 of 23	Gain	Unchanged	Gain	Gain
NFKBID	chr19	36372602	36381784	ENSG00000167604	9183	*	6.65	7.75	7.69	7.54	5.46	93	108.24	206.23	225.77	226.4	187.08	195.84	176.92	48.88	39.32	1.1	0.000646	0.0325	1.04	0.00243	0.0671	0.89	0.0083	0.0859	1.56	2.17e-05	0.00014	36379142	36393205	-	11	1949	TTS	RN7SL402P	4140	Intergenic	0.016556	0.502069		Gain	Gain	Unchanged	Gain
RIMS4	chr20	43379789	43386424	ENSG00000101098	6636	*	5.62	7.03	7.04	6.7	6.13	34	64.09	108.59	152.3	113.2	149.19	127.42	80.58	72.12	67.72	1.41	0.000615	0.0325	1.42	0.000681	0.0376	1.08	0.0134	0.111	0.23	0.528	0.593	43380448	43438979	-	5	2658	TTS	KCNK15	3432	3' UTR	0.018239	0.573022	NM_001205317, exon 6 of 6	Gain	Gain	Unchanged	Unchanged
SLC35E1	chr19	16663597	16671941	ENSG00000127526	8345	*	5.76	7.11	6.91	7.2	4.75	38	70.5	135.52	140.05	108.42	131.83	169.33	125.24	29.65	24.03	1.34	0.000621	0.0325	1.15	0.00558	0.0995	1.44	0.000402	0.0156	1.52	0.000315	0.00141	16660641	16683193	-	5	7128	TTS	CTD-3222D19.2	71246	intron	0.022294	0.515221	NM_024881, intron 4 of 5	Gain	Gain	Gain	Gain
CERCAM	chr9	131193672	131203511	ENSG00000167123	9840	*	6.65	7.86	7.53	7.75	5.56	73	127.47	230.64	234.95	149.87	221.03	247.15	182.17	57.7	36.41	1.22	0.000646	0.0325	0.89	0.0242	0.182	1.1	0.00378	0.0555	1.42	0.000363	0.00159	131174044	131199626	+	13	1034	TTS	RP11-339B21.10	4306	intron	0.022667	0.530237	NM_001286760, intron 12 of 12	Gain	Unchanged	Gain	Gain
TTLL12	chr22	43560662	43577197	ENSG00000100304	16536	*	7.87	9.05	8.63	8.75	7.1	175	293.4	457.91	599.23	342.79	447.58	501.14	357.33	149.86	124.52	1.17	0.000652	0.0325	0.75	0.0387	0.22	0.87	0.0164	0.124	1.08	0.00145	0.00514	43562627	43583139	-	13	6302	TTS	TSPO	9682	intron	0.028487	0.579075	NM_015140, intron 9 of 13	Gain	Unchanged	Unchanged	Gain
CIZ1	chr9	130975005	130982943	ENSG00000148337	7939	*	6.45	7.85	7.35	8.36	5.57	49	125.34	212.96	249.49	145.88	179.98	363.46	292.52	49.69	45.15	1.41	0.000639	0.0325	0.9	0.0391	0.221	1.91	4.6e-06	0.000955	1.24	0.00265	0.00845	130928343	130966662	-	17	12312	TSS	DNM1	13317	intron	0.022427	0.549635	NM_001288739, intron 1 of 21	Gain	Unchanged	Gain	Gain
AC007216.1	chr16	12007586	12010793	ENSG00000266163	3208	*	5.11	6.64	5.4	5.87	4.82	25	44.15	74.07	124.74	27.9	56.84	66.7	49.92	28.05	28.4	1.52	0.000649	0.0325	0.29	0.592	0.774	0.75	0.112	0.342	0.74	0.0922	0.147	12009517	12009595	-	0	328	TTS	GSPT1	588	intron	0.06675	0.554412	NM_001130007, intron 1 of 14	Gain	Unchanged	Unchanged	Unchanged
ITPRIP	chr10	106066041	106076260	ENSG00000148841	10220	*	7.14	8.23	8.12	8.39	6.07	122	159.52	330.81	271.68	262.27	296.02	385.69	287.27	64.91	69.18	1.1	0.000656	0.0326	0.99	0.00328	0.0784	1.26	0.000216	0.0108	1.39	4.77e-05	0.000279	106071893	106098162	-	2	742	TTS	RP11-127L20.5	748	3' UTR	0.018693	0.518837	NM_001272012, exon 2 of 2	Gain	Unchanged	Gain	Gain
MMP17	chr12	132310757	132316539	ENSG00000198598	5783	*	5.04	6.53	6.77	7.48	5.62	26	39.88	71.55	113.27	82.91	134.99	189	168.16	64.91	33.5	1.49	0.000667	0.0329	1.73	8.48e-05	0.0127	2.44	3.1e-10	7.92e-07	0.1	0.802	0.836	132312937	132336316	+	9	711	TSS	RNU6-1017P	13735	intron	0.065906	0.664822	NM_016155, intron 1 of 9	Gain	Gain	Gain	Unchanged
AP001065.2	chr21	45832738	45848413	ENSG00000230061	15676	*	8.59	9.77	9.46	9.64	7.02	274	494.22	829.13	916.07	578.75	833.59	948.41	648.11	141.04	118.69	1.18	0.000697	0.0336	0.88	0.0224	0.176	1.06	0.00539	0.0677	1.72	1.08e-06	1.02e-05	45834472	45845155	-	2	4580	TSS	TRPM2	22388	intron	0.027817	0.583094	NM_001320351, intron 22 of 30	Gain	Unchanged	Gain	Gain
RP11-348P10.2	chr3	44711068	44715784	ENSG00000272077	4717	*	5.66	6.94	7.05	6.97	5.03	43	58.4	112.8	132.4	117.19	147.62	126.57	123.49	36.06	29.13	1.27	0.000702	0.0336	1.38	0.000333	0.0263	1.3	0.000576	0.0193	1.02	0.0133	0.0316	44708903	44710856	+	0	2570	TTS	RP11-944L7.4	13719	intron	0.010604	0.533079	NR_157564, intron 1 of 2	Gain	Gain	Gain	Gain
AP000692.10	chr21	37692259	37696472	ENSG00000273199	4214	*	4.93	6.6	5.42	5.25	4.47	14	47	97.64	96.43	35.87	49.73	41.9	34.16	24.04	20.39	1.67	0.000709	0.0336	0.49	0.41	0.646	0.32	0.605	0.798	0.96	0.0519	0.0935	37692089	37692968	-	0	1398	TSS	MORC3	1880	intron	0.036562	0.478519	NM_001320445, intron 1 of 15	Gain	Unchanged	Unchanged	Unchanged
RP1-5O6.5	chr22	38625955	38636208	ENSG00000235246	10254	*	7.33	8.46	7.81	8.49	6.28	126	195.84	324.92	378.83	188.93	260.5	368.59	349.45	84.95	70.63	1.13	0.000702	0.0336	0.48	0.189	0.446	1.16	0.000718	0.0219	1.39	6.4e-05	0.00036	38627325	38628254	+	1	2828	TTS	RN7SL704P	3082	intron	0.021849	0.537014	NM_001195071, intron 3 of 8	Gain	Unchanged	Gain	Gain
PHIP	chr6	79784798	79788938	ENSG00000146247	4141	*	5.82	7.33	6.82	6.45	3.16	28	84.74	159.09	163.01	90.88	134.99	101.77	72.69	12.02	5.83	1.51	0.000715	0.0336	1	0.0397	0.223	0.63	0.204	0.463	2.91	2.43e-07	2.71e-06	79645583	79787953	-	39	1085	TSS	RP11-477E3.2	9013	intron	0.05726	0.491787	NM_017934, intron 4 of 39	Gain	Unchanged	Unchanged	Gain
CNN1	chr19	11652037	11664675	ENSG00000130176	12639	*	6.71	8.04	7.98	8.09	5.55	64	145.99	244.11	282.4	217.63	287.34	334.38	210.2	55.3	38.59	1.33	0.000705	0.0336	1.27	0.00216	0.0636	1.37	0.00107	0.0269	1.48	0.000296	0.00134	11649531	11661138	+	7	2782	TTS	ELOF1	3605	intron	0.025322	0.54621	NM_001299, intron 4 of 6	Gain	Gain	Gain	Gain
TPM4	chr19	16186633	16190566	ENSG00000167460	3934	*	6.59	7.83	7.28	7.32	4.71	69	123.2	200.34	254.85	116.39	193.4	181.3	137.5	32.86	19.66	1.24	0.000711	0.0336	0.69	0.0954	0.327	0.73	0.0606	0.25	2.02	3.04e-06	2.52e-05	16178347	16213813	+	9	10252	TSS	CTD-2231E14.4	11478	intron	0.055697	0.573099	NM_001367838, intron 1 of 8	Gain	Unchanged	Unchanged	Gain
RPL14	chr3	40498303	40505131	ENSG00000188846	6829	*	7.05	8.12	8.1	7.74	5.43	120	145.28	266.84	287.75	281.41	266.02	210.38	217.2	48.08	37.87	1.06	0.00069	0.0336	1.05	0.00153	0.0536	0.69	0.0363	0.19	1.86	3.43e-07	3.67e-06	40498782	40503861	+	5	2144	TTS	RP11-391M1.4	6239	intron	0.026659	0.456649	NM_001034996, intron 3 of 5	Gain	Gain	Unchanged	Gain
MIR5189	chr16	88532194	88537532	ENSG00000263456	5339	*	5.02	6.4	5.83	6.08	5.3	33	32.05	79.13	89.54	50.22	63.94	74.4	60.43	44.08	34.95	1.37	0.000721	0.0337	0.81	0.0694	0.282	1.05	0.0145	0.117	0.31	0.459	0.529	88535325	88535439	+	0	462	TSS	ZFPM1	15139	promoter-TSS	0.037287	0.620457	NR_049821	Gain	Unchanged	Unchanged	Unchanged
UPF1	chr19	18941490	18945259	ENSG00000005007	3770	*	5.2	6.63	6.41	6.02	4.4	26	47.71	96.8	101.02	77.33	92.36	76.11	53.42	24.84	17.48	1.42	0.000723	0.0337	1.2	0.00662	0.107	0.81	0.083	0.294	1.11	0.0193	0.0425	18942746	18979045	+	23	628	TSS	GDF1	35986	intron	0.059713	0.581587	NM_001297549, intron 1 of 23	Gain	Unchanged	Unchanged	Gain
TOP2B	chr3	25703005	25706903	ENSG00000077097	3899	*	5.23	6.66	6.13	6.09	4.45	26	49.14	106.06	96.43	59.79	80.52	74.4	62.18	24.84	18.93	1.43	0.00072	0.0337	0.9	0.0524	0.249	0.86	0.0601	0.249	1.27	0.00549	0.0155	25639476	25705990	-	35	1036	TSS	MIR4442	1409	intron	0.046189	0.48589	NM_001330700, intron 1 of 35	Gain	Unchanged	Unchanged	Gain
GLIPR2	chr9	36156986	36161355	ENSG00000122694	4370	*	4.92	6.4	5.7	6.24	4.78	25	35.61	101.01	68.11	31.89	71.83	80.39	70.94	36.06	18.93	1.48	0.000731	0.0339	0.78	0.138	0.389	1.32	0.00247	0.0431	0.89	0.0512	0.0925	36136731	36163901	+	6	4730	TTS	CCIN	10218	intron	0.014194	0.464179	NM_001287013, intron 4 of 4	Gain	Unchanged	Gain	Unchanged
TMEM198	chr2	220406253	220409889	ENSG00000188760	3637	*	7.13	8.25	7.84	8.29	5.04	112	168.06	281.15	328.32	165.02	292.86	366.88	259.24	32.86	32.77	1.12	0.00074	0.0342	0.71	0.0692	0.282	1.16	0.00115	0.0279	2.22	7.07e-09	1.16e-07	220408384	220415301	+	5	313	TSS	CHPF	438	promoter-TSS	0.058872	0.614411	NM_001195731	Gain	Unchanged	Gain	Gain
ZNF710	chr15	90542125	90546989	ENSG00000140548	4865	*	6.29	7.56	7.78	7.29	5.48	55	101.12	170.03	206.63	188.93	251.81	163.34	150.64	50.49	38.59	1.27	0.000752	0.0342	1.5	0.000127	0.0156	1.01	0.00937	0.0918	1.14	0.00427	0.0126	90544623	90625432	+	4	66	TSS	MIR3174	5429	promoter-TSS	0.057783	0.606702	NM_198526	Gain	Gain	Gain	Gain
GRAMD4	chr22	46984150	46988624	ENSG00000075240	4475	*	6	7.18	6.78	7.49	5.4	60	67.65	134.68	154.59	94.07	125.51	227.48	132.25	50.49	34.22	1.18	0.00075	0.0342	0.78	0.0395	0.222	1.49	0.000104	0.0069	1.03	0.00852	0.0221	46971908	47033833	+	18	14479	TSS	RP3-439F8.1	42294	intron	0.024368	0.5903	NM_001366660, intron 1 of 17	Gain	Unchanged	Gain	Gain
COL9A2	chr1	40764422	40770427	ENSG00000049089	6006	*	6.95	8.1	7.73	7.58	5.31	100	147.41	236.53	313.78	204.88	220.24	211.23	171.66	42.47	37.14	1.15	0.000744	0.0342	0.78	0.0263	0.188	0.63	0.0759	0.282	1.91	3.13e-07	3.37e-06	40766158	40782966	-	31	1266	TTS	ZMPSTE24	7568	intron	0.025983	0.572856	NM_001852, intron 31 of 31	Gain	Unchanged	Unchanged	Gain
ARPC4-TTLL3	chr3	9832605	9837305	ENSG00000250151	4701	*	7.33	8.56	7.31	7.02	4.74	106	215.78	375.42	380.36	129.94	187.08	151.37	108.6	34.46	18.93	1.23	0.000745	0.0342	-0.02	0.947	0.974	-0.31	0.435	0.68	2.73	3.7e-10	8.18e-09	9834797	9877085	+	11	158	TSS	TADA3	524	promoter-TSS	0.032134	0.520426	NM_001278270	Gain	Unchanged	Unchanged	Gain
AC004637.1	chr19	3666443	3674371	ENSG00000267304	7929	*	6.54	7.64	7.68	8.1	5.71	91	94.71	180.14	219.64	171.39	238.39	330.96	218.08	60.1	44.42	1.11	0.000762	0.0343	1.14	0.00117	0.0481	1.56	8.46e-06	0.00134	1.04	0.00525	0.0149	3672579	3674293	+	2	2172	TSS	PIP5K1C	30070	intron	0.039611	0.645182	NM_012398, intron 1 of 17	Gain	Gain	Gain	Gain
COL5A1-AS1	chr9	137625274	137636193	ENSG00000204011	10920	*	6.66	7.89	7.75	7.47	6.31	71	131.03	222.22	251.02	187.34	243.92	212.94	142.76	90.56	67.72	1.23	0.000757	0.0343	1.09	0.00475	0.0923	0.82	0.0404	0.201	0.84	0.0227	0.0484	137541230	137544689	-	1	86044	TSS	COL5A1	97114	intron	0.025371	0.583112	NM_001278074, intron 11 of 65	Gain	Gain	Unchanged	Unchanged
MEF2D	chr1	156456386	156465408	ENSG00000116604	9023	*	6.78	7.96	6.98	7.71	6.02	82	138.15	260.1	238.01	98.05	154.72	237.74	182.17	77.73	51.7	1.18	0.000771	0.0343	0.2	0.629	0.798	0.93	0.0123	0.106	1.21	0.00129	0.00468	156433518	156470620	-	11	9723	TSS	RP11-284F21.8	18748	promoter-TSS	0.010531	0.552427	NM_001271629	Gain	Unchanged	Unchanged	Gain
PCNT	chr21	47771738	47779392	ENSG00000160299	7655	*	5.66	7.07	6.58	7.04	5.8	32	69.08	117	152.3	66.96	124.72	145.38	118.24	60.1	50.97	1.41	0.000762	0.0343	0.92	0.0519	0.248	1.38	0.00113	0.0276	0.59	0.126	0.188	47744035	47865682	+	46	31530	TSS	C21orf58	31776	intron	0.029139	0.569637	NM_001315529, intron 12 of 46	Gain	Unchanged	Gain	Unchanged
PLEKHG3	chr14	65194632	65199763	ENSG00000126822	5132	*	6.33	7.56	7.36	7.66	6.05	61	100.41	170.88	205.87	121.97	206.82	230.05	174.29	76.13	56.8	1.22	0.000771	0.0343	1.03	0.0118	0.133	1.32	0.000419	0.0159	0.82	0.0267	0.0551	65171153	65213610	+	16	16412	TTS	SPTB	18474	intron	0.016374	0.571623	NM_001308147, intron 4 of 16	Gain	Unchanged	Gain	Unchanged
ACTB	chr7	5562327	5573839	ENSG00000075624	11513	*	10.23	11.67	11.18	11.38	7.55	745	1660.7	2994.12	3540.3	2110.94	2532.35	2842.66	2475.06	209.96	163.84	1.44	0.000774	0.0343	0.95	0.032	0.204	1.14	0.0078	0.0831	2.78	5.04e-12	1.76e-10	5568222	5603415	-	6	139	TTS	AC006483.1	266	exon	0.037008	0.577658	NM_001101, exon 4 of 6	Gain	Unchanged	Gain	Gain
KANSL2	chr12	49073569	49076348	ENSG00000139620	2780	*	4.52	6.25	6.08	5.58	4.08	11	34.89	71.55	80.36	63.77	71.83	52.17	43.79	20.03	13.84	1.73	0.000777	0.0344	1.56	0.0033	0.0784	1.06	0.0624	0.254	1.25	0.0139	0.0328	49047184	49076008	-	9	1050	TSS	CCNT1	7288	intron	0.040317	0.509176	NM_017822, intron 2 of 9	Gain	Gain	Unchanged	Gain
RP11-38J22.6	chr1	206274669	206278477	ENSG00000240754	3809	*	4.5	6.22	5.73	5.62	4.48	11	34.18	73.23	75.77	47.83	58.41	59.86	38.54	26.45	18.2	1.72	0.000791	0.0346	1.23	0.0273	0.191	1.12	0.0519	0.23	0.7	0.161	0.229	206288155	206306115	-	3	11582	TTS	C1orf186	12074	intron	0.034936	0.574055	NM_001007544, intron 1 of 5	Gain	Unchanged	Unchanged	Unchanged
MIR1301	chr2	25528874	25532783	ENSG00000221445	3910	*	4.77	6.3	5.77	5.91	5	19	35.61	72.39	84.95	50.22	59.2	67.56	52.55	32.86	31.31	1.53	0.000786	0.0346	1	0.0429	0.229	1.14	0.0196	0.138	0.44	0.314	0.389	25551508	25551590	-	0	20680	TTS	DNMT3A	34630	intron	0.016633	0.530315	NR_135490, intron 2 of 23	Gain	Unchanged	Unchanged	Unchanged
DUSP8	chr11	1583630	1599020	ENSG00000184545	15391	*	8.12	9.39	8.4	8.98	6.4	173	383.84	622.06	723.21	272.64	402.59	525.09	487.83	107.38	61.17	1.27	0.000788	0.0346	0.28	0.503	0.713	0.86	0.0272	0.163	1.91	0.00168	0.00582	1575273	1593150	-	6	1825	TSS	KRTAP5-AS1	2645	intron	0.042433	0.627615	NM_004420, intron 1 of 6	Gain	Unchanged	Unchanged	Gain
YY1P1	chr10	72269610	72273813	ENSG00000230661	4204	*	4.94	6.34	5.52	6.51	4.99	27	34.18	79.13	82.65	34.28	57.63	92.36	89.33	27.25	36.41	1.4	0.000801	0.0349	0.59	0.238	0.498	1.57	0.000152	0.00867	0.75	0.0807	0.132	72245091	72246081	-	1	25630	TSS	PALD1	33136	intron	0.014993	0.509398	NM_014431, intron 1 of 19	Gain	Unchanged	Gain	Unchanged
FAM73B	chr9	131826312	131838047	ENSG00000148343	11736	*	7.19	8.29	7.81	8.16	6.13	124	168.78	273.57	354.34	192.92	256.55	314.71	259.24	87.35	52.43	1.1	0.000804	0.0349	0.62	0.0788	0.3	0.97	0.00395	0.0568	1.4	0.000146	0.000732	131798922	131834350	+	16	2170	TTS	DOLPP1	11198	non-coding	0.025226	0.547337	NR_138422, exon 13 of 14	Gain	Unchanged	Unchanged	Gain
CTB-55O6.10	chr19	14231901	14241510	ENSG00000267783	9610	*	6.87	7.98	8.07	8.13	5.17	97	136.73	265.99	237.24	254.3	281.81	330.1	230.34	38.47	33.5	1.11	0.000822	0.035	1.2	0.000508	0.0327	1.26	0.00039	0.0153	1.94	2.87e-07	3.13e-06	14229917	14230349	+	1	6356	TTS	ASF1B	6386	intron	0.018006	0.496201	NM_018154, intron 2 of 3	Gain	Gain	Gain	Gain
COX7BP1	chr22	35605249	35607882	ENSG00000243453	2634	*	4.56	6.16	5.34	6.27	5.28	18	29.2	86.7	55.87	34.28	46.57	94.93	59.56	44.88	32.77	1.59	0.000825	0.035	0.78	0.145	0.398	1.71	0.000318	0.0134	0.22	0.599	0.658	35590691	35590935	-	0	15630	TSS	CTA-714B7.5	20484	intron	0.007979	0.484239	NR_126356, intron 1 of 5	Gain	Unchanged	Gain	Unchanged
ZCCHC14	chr16	87523306	87527385	ENSG00000140948	4080	*	6.24	7.66	8.02	7.51	4.98	41	109.67	180.14	223.47	227.99	289.7	219.78	143.63	36.06	26.94	1.42	0.000829	0.035	1.78	3.92e-05	0.00811	1.27	0.00467	0.0628	1.45	0.00152	0.00534	87439851	87525651	-	13	306	TSS	RP11-482M8.1	2446	exon	0.088033	0.628095	NM_015144, exon 1 of 13	Gain	Gain	Gain	Gain
RP11-47I22.4	chr14	62104896	62108024	ENSG00000258989	3129	*	5.87	7.06	7.03	5.92	5.08	55	61.96	140.57	126.28	141.1	119.99	59.86	61.31	32.06	35.68	1.19	0.000825	0.035	1.16	0.00169	0.0558	0.05	0.904	0.957	1.29	0.000999	0.00377	61995845	62124682	+	3	18222	TTS	RP11-47I22.3	18954	intron	0.017589	0.428389	NR_039985, intron 1 of 2	Gain	Gain	Unchanged	Gain
MICAL2	chr11	12168721	12174147	ENSG00000133816	5427	*	5.31	6.74	6.26	6.57	4.79	26	53.41	101.01	112.5	58.19	95.52	93.22	97.22	31.25	24.03	1.43	0.000819	0.035	0.95	0.0462	0.237	1.26	0.00396	0.0568	1.24	0.00398	0.0119	12115542	12284466	+	27	55892	TSS	RP13-631K18.5	60446	intron	0.010323	0.478437	NR_144417, intron 2 of 26	Gain	Unchanged	Gain	Gain
PLEKHG3	chr14	65170691	65177069	ENSG00000126822	6379	*	6.24	7.41	6.87	6.95	6.2	76	74.77	199.5	140.82	109.21	124.72	135.12	112.98	84.95	61.89	1.17	0.000823	0.035	0.63	0.0785	0.3	0.72	0.0439	0.21	0.72	0.0452	0.0837	65171153	65213610	+	16	2727	TSS	SPTB	41792	intron	0.032304	0.549545	NM_001308147, intron 1 of 16	Gain	Unchanged	Unchanged	Unchanged
CLTB	chr5	175813391	175823290	ENSG00000175416	9900	*	7.77	8.88	8.59	8.85	5.84	166	269.9	454.55	485.97	341.19	428.64	492.59	430.9	68.12	46.6	1.11	0.000818	0.035	0.82	0.0222	0.176	1.08	0.00183	0.036	2.13	8.08e-09	1.31e-07	175819455	175843570	-	5	1114	TTS	HIGD2A	1568	Intergenic	0.024045	0.524497		Gain	Unchanged	Gain	Gain
RPS28	chr19	8394414	8401085	ENSG00000233927	6672	*	5.59	6.94	7.73	8.07	5.29	34	62.67	113.64	132.4	179.37	246.29	361.75	176.92	51.29	26.94	1.35	0.000827	0.035	2.14	9.78e-08	0.000262	2.48	1.05e-08	1.18e-05	0.75	0.0885	0.143	8386383	8388224	+	3	9526	TTS	KANK3	10282	intron	0.054423	0.605307	NM_198471, intron 7 of 10	Gain	Gain	Gain	Unchanged
RP11-757G1.6	chr11	68644194	68649779	ENSG00000250508	5586	*	4.6	6.14	6.66	5.84	5.07	23	25.64	85.86	55.1	98.85	103.41	69.27	45.54	34.46	32.77	1.54	0.000841	0.0352	2.06	9.51e-07	0.000802	1.24	0.00964	0.0929	0.31	0.476	0.544	68638131	68642010	+	1	4976	TTS	MRPL21	11760	Intergenic	0.013789	0.490242		Gain	Gain	Gain	Unchanged
FBXL16	chr16	742458	761120	ENSG00000127585	18663	*	8.51	9.68	9.6	10.27	7.29	263	464.31	719.7	922.96	644.12	913.32	1356.33	1118.42	184.32	128.89	1.18	0.000842	0.0352	1.1	0.00396	0.0851	1.77	1.64e-06	0.000462	1.44	5.64e-05	0.000324	742499	755829	-	6	4040	TSS	LA16c-380A1.1	8956	intron	0.047157	0.643982	NM_153350, intron 1 of 5	Gain	Gain	Gain	Gain
PNPLA3	chr22	44332045	44336936	ENSG00000100344	4892	*	5.73	6.95	6.19	6.78	5.3	49	56.97	135.52	112.5	60.59	85.25	132.55	87.58	44.08	34.95	1.23	0.000837	0.0352	0.46	0.265	0.522	1.05	0.00753	0.0816	0.9	0.0225	0.048	44319671	44360368	+	9	14820	TSS	SAMM50	16810	intron	0.013497	0.513392	NM_025225, intron 6 of 8	Gain	Unchanged	Gain	Unchanged
PVRIG2P	chr7	99946997	99958271	ENSG00000235333	11275	*	7.89	8.93	8.47	9.31	6.27	208	266.34	438.55	534.18	298.94	412.06	744.02	521.11	92.16	62.62	1.04	0.000855	0.0356	0.58	0.0881	0.315	1.42	3e-05	0.00322	1.82	1.49e-07	1.74e-06	99949982	99951315	+	4	1319	TTS	STAG3L5P	3111	intron	0.014903	0.564839	NR_036569, intron 12 of 17	Gain	Unchanged	Gain	Gain
CDC42EP2	chr11	65086426	65097368	ENSG00000149798	10943	*	8.32	9.32	9.37	9.12	5.93	289	348.95	595.96	684.95	605.06	715.97	631.13	485.2	66.51	55.34	1.01	0.000861	0.0357	1.05	0.0013	0.0503	0.81	0.013	0.109	2.55	1.68e-14	1.03e-12	65082288	65089900	+	1	1997	TTS	DPF2	9327	Intergenic	0.020291	0.509048		Gain	Gain	Unchanged	Gain
C19orf54	chr19	41256657	41259959	ENSG00000188493	3303	*	4.68	6.19	5.69	4.82	3.97	20	31.33	79.13	66.58	47.03	56.05	23.95	32.41	15.23	16.02	1.51	0.000871	0.036	1.01	0.0407	0.224	0.13	0.825	0.92	1.26	0.012	0.0292	41247596	41257458	-	8	850	TSS	SNRPA	1545	intron	0.036353	0.508177	NM_004596, intron 1 of 5	Gain	Unchanged	Unchanged	Gain
CTPS1	chr1	41450359	41455925	ENSG00000171793	5567	*	7.15	8.2	7.6	7.83	5.14	126	158.81	302.19	284.69	181.76	206.82	270.24	184.8	37.66	32.77	1.04	0.000886	0.0365	0.45	0.187	0.443	0.68	0.0534	0.233	2.34	1.32e-10	3.23e-09	41445006	41478235	+	18	8136	TSS	SLFNL1	28126	non-coding	0.010782	0.438735	NR_125440, exon 4 of 18	Gain	Unchanged	Unchanged	Gain
HNRNPA1P33	chr10	47133236	47139210	ENSG00000213412	5975	*	6.58	7.67	7.61	6.89	6.33	89	101.84	220.54	185.97	228.79	162.61	112.89	124.37	81.74	79.37	1.09	0.000908	0.0367	1.04	0.00358	0.0811	0.31	0.373	0.628	1.01	0.00273	0.00867	47133337	47133898	-	0	2325	TSS	LINC00842	37795	intron	0.009208	0.478909	NR_033957, intron 1 of 3	Gain	Gain	Unchanged	Gain
RP11-936I5.1	chr17	75359602	75363970	ENSG00000266998	4369	*	5.99	7.26	6.84	7.43	5.1	46	81.18	140.57	166.07	98.05	131.83	200.97	144.51	35.26	33.5	1.27	0.000903	0.0367	0.85	0.0383	0.219	1.44	0.000265	0.0121	1.4	0.000432	0.00185	75369899	75373318	-	0	8113	TTS	SEPT9	84295	intron	0.019006	0.543956	NM_006640, intron 1 of 10	Gain	Unchanged	Gain	Gain
HSH2D	chr19	16240087	16247411	ENSG00000196684	7325	*	6.44	7.53	7.39	7.58	4.96	88	86.17	185.19	183.67	145.88	189.45	239.45	144.51	35.26	26.94	1.08	0.000903	0.0367	0.95	0.00721	0.111	1.14	0.00198	0.038	1.69	1.57e-05	0.000105	16244837	16269381	+	8	1088	TSS	RAB8A	1295	3' UTR	0.018845	0.511606	NM_005370, exon 8 of 8	Gain	Unchanged	Gain	Gain
SETD1B	chr12	122254645	122269333	ENSG00000139718	14689	*	8.45	9.52	9.27	9.79	6.58	288	410.9	654.04	813.52	546.07	688.35	933.87	832.9	107.38	83.74	1.07	0.0009	0.0367	0.82	0.0173	0.159	1.34	5.98e-05	0.00479	2.03	1.54e-09	2.93e-08	122242085	122270490	+	17	8501	TTS	HPD	15446	intron	0.032478	0.56393	NM_001353345, intron 11 of 15	Gain	Unchanged	Gain	Gain
SDK2	chr17	71346253	71351984	ENSG00000069188	5732	*	5.44	6.92	7.15	7.19	5.91	24	62.67	113.64	127.81	122.77	161.03	163.34	127.87	61.71	58.25	1.48	0.000906	0.0367	1.71	0.000159	0.0178	1.75	9.14e-05	0.00633	0.35	0.365	0.44	71330522	71640228	-	44	18596	TTS	CDC42EP4	40804	intron	0.02007	0.528878	NM_001144952, intron 40 of 44	Gain	Gain	Gain	Unchanged
DOCK1	chr10	128592373	128597472	ENSG00000150760	5100	*	6.88	7.98	7.09	7.18	5.02	96	138.87	238.22	267.09	101.24	171.3	166.76	122.61	33.66	31.31	1.11	0.000899	0.0367	0.21	0.59	0.773	0.3	0.416	0.663	2.04	1.07e-07	1.3e-06	128593977	129250781	+	51	946	TSS	RP11-223P11.3	203618	intron	0.051393	0.592469	NM_001380, intron 1 of 51	Gain	Unchanged	Unchanged	Gain
TERF2	chr16	69397515	69401300	ENSG00000132604	3786	*	4.67	6.21	6.1	6.86	4.43	18	32.76	85.02	63.52	55.8	81.31	114.6	118.24	24.84	18.2	1.55	0.000916	0.0369	1.43	0.00315	0.0769	2.2	3.02e-07	0.000144	0.76	0.119	0.18	69406171	69442474	-	9	6764	TTS	RP11-343C2.9	9198	intron	0.012156	0.480317	NM_005652, intron 7 of 9	Gain	Gain	Gain	Unchanged
CHID1	chr11	883397	895975	ENSG00000177830	12579	*	6.47	7.57	6.98	7.6	5.9	89	88.3	169.19	211.22	80.52	171.3	236.03	152.39	68.12	50.97	1.1	0.000918	0.0369	0.51	0.222	0.481	1.13	0.00169	0.0345	1.03	0.00457	0.0133	867356	914682	-	14	22330	TTS	TSPAN4	22575	intron	0.028465	0.618302	NM_001142677, intron 7 of 11	Gain	Unchanged	Gain	Gain
RP4-784A16.4	chr1	53764623	53769354	ENSG00000232762	4732	*	5.12	6.51	6.08	6.46	4.71	26	43.44	88.38	94.13	69.35	66.31	98.35	77.95	32.06	20.39	1.39	0.000929	0.0371	0.97	0.0321	0.204	1.34	0.00193	0.0373	0.99	0.0279	0.0571	53770207	53773134	+	5	3218	TSS	LRP8	26698	intron	0.014376	0.552737	NM_017522, intron 2 of 15	Gain	Unchanged	Gain	Unchanged
TRIM17	chr1	228587773	228603138	ENSG00000162931	15366	*	7.52	8.57	8.47	8.17	6.66	155	212.93	364.48	393.37	318.87	391.54	343.79	231.22	111.39	90.29	1.04	0.000934	0.0371	0.95	0.00526	0.0976	0.64	0.0677	0.265	1.22	0.000248	0.00115	228595736	228604365	-	6	280	TTS	RP11-245P10.4	374	promoter-TSS	0.024863	0.569346	NM_145214	Gain	Unchanged	Unchanged	Gain
MTSS1	chr8	125564976	125570327	ENSG00000170873	5352	*	7.15	8.5	8.46	8.5	5.9	78	206.52	385.52	339.03	290.97	414.43	375.43	350.33	68.92	50.24	1.35	0.000933	0.0371	1.31	0.00258	0.069	1.35	0.00123	0.029	1.58	0.000114	0.000592	125563030	125740730	-	14	4622	TTS	NDUFB9	13100	intron	0.02	0.516165	NM_001363301, intron 12 of 12	Gain	Gain	Gain	Gain
PML	chr15	74324107	74331948	ENSG00000140464	7842	*	6.42	7.55	7.41	7.22	5.69	76	95.43	167.51	207.4	143.49	197.35	177.88	120.86	53.69	49.52	1.13	0.000925	0.0371	0.99	0.00646	0.105	0.8	0.0303	0.173	1.07	0.00331	0.0102	74287069	74340153	+	8	12126	TTS	DNM1P33	27092	exon	0.015306	0.551205	NM_033250, exon 7 of 7	Gain	Unchanged	Unchanged	Gain
FABP7P2	chr2	96015952	96020333	ENSG00000235129	4382	*	5.27	6.58	5.76	5.99	5.38	33	44.15	95.96	95.66	49.43	59.2	83.81	42.92	49.69	33.5	1.31	0.000952	0.0376	0.49	0.274	0.53	0.72	0.129	0.367	0.45	0.276	0.351	96034254	96034633	-	0	16112	TTS	KCNIP3	33682	intron	0.016895	0.569048	NM_001034914, intron 1 of 7	Gain	Unchanged	Unchanged	Unchanged
LINC01346	chr1	4059122	4066353	ENSG00000233304	7232	*	6.36	7.57	7.35	7.02	5.21	64	100.41	219.7	160.71	132.33	194.19	147.09	112.1	47.28	26.94	1.21	0.000958	0.0376	0.99	0.0109	0.129	0.66	0.0878	0.302	1.42	0.000608	0.00247	4000676	4015322	+	2	47416	TTS	RP13-614K11.2	53698	Intergenic	0.026418	0.566727		Gain	Unchanged	Unchanged	Gain
CTA-299D3.8	chr22	48910016	48927460	ENSG00000219016	17445	*	7.2	8.35	8.12	8.55	7.32	107	188	313.13	339.8	247.13	307.86	427.6	323.18	179.51	140.54	1.15	0.000976	0.0376	0.91	0.0142	0.146	1.35	0.000244	0.0116	0.38	0.256	0.331	48934711	48943199	-	4	15973	TTS	FAM19A5	33335	intron	0.02706	0.590461	NM_001082967, intron 1 of 3	Gain	Unchanged	Gain	Unchanged
AC012360.6	chr2	105987678	105989959	ENSG00000238273	2282	*	4.99	6.37	5.83	5.81	4.01	31	32.76	94.28	71.17	48.63	65.52	62.43	49.92	18.43	13.84	1.38	0.000988	0.0376	0.84	0.0635	0.272	0.82	0.0684	0.267	1.73	0.000228	0.00107	105979494	105995296	+	3	6478	TTS	FHL2	11536	intron	0.016667	0.468216	NM_001318898, intron 3 of 5	Gain	Unchanged	Unchanged	Gain
RNU7-117P	chr16	89603290	89609096	ENSG00000252579	5807	*	5.04	6.44	5.34	6.43	5.25	25	40.59	81.65	91.84	42.25	38.68	97.49	75.32	53.69	22.57	1.4	0.000986	0.0376	0.3	0.553	0.747	1.4	0.00136	0.0307	0.42	0.366	0.441	89599923	89599962	-	0	6231	TSS	SPG7	17981	intron	0.030663	0.53772	NM_001363850, intron 9 of 17	Gain	Unchanged	Gain	Unchanged
RP11-715J22.3	chr16	2493431	2502001	ENSG00000260095	8571	*	6.94	8.1	8.32	8.53	5.89	95	150.97	234.85	313.01	281.41	357.59	416.48	322.3	72.12	46.6	1.16	0.000968	0.0376	1.38	0.000134	0.0161	1.59	7.93e-06	0.00127	1.39	0.000226	0.00107	2502581	2502978	-	0	4865	TTS	CCNF	11139	intron	0.028942	0.555309	NM_001323538, intron 9 of 15	Gain	Gain	Gain	Gain
ADAMTS2	chr5	178550212	178555864	ENSG00000087116	5653	*	4.95	6.34	6.89	6.68	5.24	26	35.61	78.28	83.42	92.47	144.46	115.45	89.33	37.66	37.87	1.39	0.000976	0.0376	1.94	5.44e-06	0.00269	1.73	3.3e-05	0.0034	0.38	0.364	0.439	178537851	178772431	-	21	15187	TTS	ZNF354C	42500	exon	0.03026	0.592887	NM_014244, exon 18 of 22	Gain	Gain	Gain	Unchanged
RASL10B	chr17	34063419	34071065	ENSG00000141150	7647	*	7.83	8.88	8.61	8.32	5.9	184	271.32	459.6	483.67	356.34	424.69	369.44	268.88	72.93	46.6	1.05	0.00099	0.0376	0.78	0.0238	0.181	0.49	0.164	0.416	2.15	3.81e-09	6.63e-08	34058667	34070540	+	3	3298	TTS	GAS2L2	4287	intron	0.019751	0.534005	NM_033315, intron 2 of 3	Gain	Unchanged	Unchanged	Gain
RNPEPL1	chr2	241509326	241520205	ENSG00000142327	10880	*	7.36	8.38	8.16	8.16	6.3	150	178.75	308.08	358.93	222.41	348.12	320.7	249.61	98.57	58.98	1.02	0.000973	0.0376	0.8	0.0252	0.185	0.79	0.0161	0.123	1.36	0.000181	0.000879	241508103	241520789	+	10	6024	TTS	CAPN10-AS1	7350	intron	0.027946	0.633974	NM_018226, intron 7 of 10	Gain	Unchanged	Unchanged	Gain
SPACA6P	chr19	52190608	52218841	ENSG00000182310	28234	*	9.47	10.57	9.97	10.34	7.36	579	840.32	1575.77	1459.44	848.2	1159.61	1420.47	1176.22	187.52	141.27	1.1	0.000984	0.0376	0.5	0.169	0.425	0.87	0.0125	0.107	2.27	2.5e-11	7.29e-10	52196592	52208443	+	7	3718	TTS	AC018755.2	7114	intron	0.023201	0.538767	NR_024330, intron 1 of 7	Gain	Unchanged	Unchanged	Gain
TMEM39B	chr1	32565769	32570234	ENSG00000121775	4466	*	5.99	7.25	7.15	7.1	4.68	46	81.18	159.09	144.64	129.94	154.72	165.91	108.6	28.85	22.57	1.26	0.000973	0.0376	1.16	0.0034	0.0791	1.11	0.0069	0.0776	1.57	0.000271	0.00124	32537631	32568464	+	10	462	TTS	KPNA6	5636	intron	0.012769	0.483763	NM_001319678, intron 6 of 6	Gain	Gain	Gain	Gain
ELK1	chrX	47494569	47499489	ENSG00000126767	4921	*	5.74	7.02	6.71	7.09	4.53	39	67.65	124.58	135.46	99.65	109.72	165.91	106.85	27.25	18.93	1.29	0.000969	0.0376	0.97	0.0178	0.161	1.35	0.00109	0.0271	1.39	0.00222	0.00733	47494919	47509887	-	6	2110	TTS	CFP	7325	intron	0.019313	0.535976	NM_001114123, intron 5 of 6	Gain	Unchanged	Gain	Gain
CENPB	chr20	3763045	3768397	ENSG00000125817	5353	*	7.86	9.04	8.68	8.47	5.31	157	306.93	484.85	570.15	318.08	502.05	419.04	291.65	40.87	38.59	1.19	0.000987	0.0376	0.82	0.0401	0.224	0.62	0.112	0.342	2.68	6.4e-12	2.17e-10	3764497	3767337	-	0	1224	TTS	CDC25B	1856	exon	0.049897	0.595665	NM_001810, exon 1 of 1	Gain	Unchanged	Unchanged	Gain
EIF2A	chr3	150262985	150265445	ENSG00000144895	2461	*	5.97	7.13	6.35	6.27	4.11	60	65.52	133	146.17	82.91	80.52	80.39	74.44	19.23	15.29	1.15	0.000978	0.0376	0.38	0.321	0.571	0.3	0.431	0.676	2.11	1.46e-06	1.32e-05	150264480	150302029	+	13	265	TSS	SERP1	4431	promoter-TSS	0.059374	0.523984	NM_014445	Gain	Unchanged	Unchanged	Gain
NAT9	chr17	72762144	72774280	ENSG00000109065	12137	*	8.33	9.43	9.33	9.66	6.82	238	403.78	681.82	700.25	592.31	697.82	858.61	756.71	125.01	101.22	1.11	0.00101	0.0382	1.01	0.00535	0.0979	1.33	0.00017	0.0094	1.81	1.24e-07	1.48e-06	72766685	72772470	-	6	1527	TTS	SLC9A3R1	2720	intron	0.021014	0.546638	NR_130953, intron 5 of 6	Gain	Gain	Gain	Gain
RP11-28B23.1	chr17	18879176	18891284	ENSG00000263045	12109	*	8.03	9.17	8.68	9.42	6.59	188	334.7	529.46	619.13	330.83	488.63	788.49	585.92	116.2	76.46	1.14	0.00103	0.0387	0.65	0.0899	0.318	1.39	0.000154	0.00877	1.66	6.65e-06	5e-05	18889460	18889647	-	0	4230	TTS	FAM83G	13129	intron	0.025192	0.592501	NM_001039999, intron 3 of 5	Gain	Unchanged	Gain	Gain
BCL2L11	chr2	111876005	111883453	ENSG00000153094	7449	*	7.39	8.67	8.88	8.61	6.35	99	235.72	367.85	449.23	424.1	517.84	458.38	324.93	93.76	69.18	1.29	0.00103	0.0387	1.49	0.000272	0.0239	1.23	0.00296	0.0481	1.22	0.00234	0.00764	111878505	111926024	+	5	1224	TSS	ACOXL	3930	intron	0.071438	0.588749	NM_207002, intron 1 of 3	Gain	Gain	Gain	Gain
SIX4	chr14	61186881	61191417	ENSG00000100625	4537	*	6.46	7.69	7.68	7.78	6.05	62	114.65	187.71	224.23	192.92	217.08	259.98	179.54	82.54	50.24	1.22	0.00104	0.0387	1.21	0.00154	0.0538	1.32	0.000792	0.023	0.88	0.0245	0.0514	61176245	61190852	-	3	1703	TSS	MNAT1	12330	intron	0.057552	0.590829	NM_017420, intron 1 of 2	Gain	Gain	Gain	Unchanged
PWP2	chr21	45522777	45531100	ENSG00000241945	8324	*	7.15	8.17	7.05	7.58	5.85	130	153.82	273.57	302.3	116.39	149.19	206.96	175.16	56.9	58.25	1.02	0.00104	0.0387	-0.1	0.779	0.886	0.43	0.198	0.456	1.61	2.91e-06	2.43e-05	45527170	45551063	+	20	232	TSS	TRAPPC10	506	promoter-TSS	0.031242	0.493091	NM_001368238	Gain	Unchanged	Unchanged	Gain
PNPLA7	chr9	140352242	140357452	ENSG00000130653	5211	*	4.96	6.56	6.32	6.35	5.45	16	46.29	78.28	110.2	66.17	93.94	88.94	74.44	50.49	37.14	1.6	0.00106	0.039	1.36	0.00741	0.112	1.39	0.00504	0.0652	0.08	0.827	0.857	140354404	140444986	-	34	443	TTS	NSMF	1061	exon	0.06124	0.685797	NM_152286, exon 34 of 34	Gain	Unchanged	Gain	Unchanged
ERVH48-1	chr21	44332058	44336585	ENSG00000233056	4528	*	5.15	6.5	7.2	6.51	5.11	32	39.17	76.6	104.08	142.7	151.56	101.77	80.58	40.87	28.4	1.34	0.00107	0.039	2.05	8.98e-08	0.000262	1.36	0.000959	0.0254	0.59	0.166	0.235	44336912	44345756	-	1	2590	TTS	NDUFV3	5106	TTS	0.023862	0.501657	NM_001001503	Gain	Gain	Gain	Unchanged
LL22NC03-32F9.1	chr22	34315232	34319163	ENSG00000273082	3932	*	5.42	6.76	6.79	6.61	5.29	30	55.55	109.43	107.91	94.07	127.09	98.35	96.34	46.48	32.04	1.35	0.00107	0.039	1.37	0.00141	0.0518	1.19	0.00509	0.0656	0.63	0.13	0.193	34318409	34318754	+	0	1212	TSS	LARGE	1386	promoter-TSS	0.084987	0.646909	NM_004737	Gain	Gain	Gain	Unchanged
FERMT3	chr11	63972828	63979733	ENSG00000149781	6906	*	6.84	7.91	7.06	7.65	5.79	97	131.75	240.74	239.54	96.46	169.72	207.81	194.43	63.31	47.33	1.07	0.00106	0.039	0.22	0.583	0.768	0.81	0.0172	0.127	1.36	0.000197	0.000946	63974205	63991354	+	14	2076	TSS	STIP1	4266	intron	0.030127	0.615062	NM_178443, intron 2 of 14	Gain	Unchanged	Unchanged	Gain
KIF1A	chr2	241659864	241666439	ENSG00000130294	6576	*	5.58	6.91	6.61	6.85	5.57	33	62.67	121.21	118.62	78.12	116.83	137.69	93.71	59.3	35.68	1.33	0.00107	0.039	1.03	0.0203	0.17	1.27	0.00295	0.0481	0.46	0.275	0.35	241653182	241759725	-	49	9970	TTS	AQP12A	25252	intron	0.027228	0.611863	NM_004321, intron 39 of 46	Gain	Unchanged	Gain	Unchanged
KCTD5	chr16	2731657	2735744	ENSG00000167977	4088	*	5.21	6.58	5.92	5.97	4.31	27	47	92.59	98.72	58.19	63.15	69.27	56.05	19.23	20.39	1.37	0.00107	0.039	0.71	0.122	0.367	0.76	0.0985	0.319	1.38	0.00285	0.00899	2732475	2759031	+	5	1226	TSS	ERVK13-1	10326	intron	0.038179	0.509175	NM_018992, intron 1 of 5	Gain	Unchanged	Unchanged	Gain
SLC29A1	chr6	44204089	44208376	ENSG00000112759	4288	*	5.09	6.42	6.51	5.96	4.8	31	37.03	79.13	92.6	105.23	77.36	49.6	75.32	28.85	26.94	1.34	0.00107	0.039	1.42	0.000696	0.0376	0.88	0.0521	0.23	0.9	0.0352	0.0686	44187241	44201888	+	13	4344	TTS	HSP90AB1	8590	Intergenic	0.024265	0.500816		Gain	Gain	Unchanged	Unchanged
CD59	chr11	33753231	33757336	ENSG00000085063	4106	*	5.23	6.57	6.45	5.49	4.17	31	44.15	106.06	84.18	82.11	92.36	37.63	52.55	19.23	16.75	1.34	0.00105	0.039	1.22	0.00365	0.0822	0.26	0.589	0.788	1.42	0.00242	0.00786	33730245	33757985	-	5	2702	TSS	FBXO3	7208	intron	0.016569	0.457491	NM_203330, intron 1 of 5	Gain	Gain	Unchanged	Gain
RNU6-476P	chr22	42077073	42080601	ENSG00000207457	3529	*	4.71	6.26	6.06	5.7	4.31	16	36.32	81.65	71.94	65.37	67.89	57.3	46.42	18.43	21.12	1.55	0.00108	0.0391	1.35	0.00628	0.105	0.99	0.0583	0.245	1.31	0.00497	0.0142	42075714	42075821	+	0	3016	TTS	NHP2L1	7671	intron	0.026652	0.452948	NM_005008, intron 1 of 3	Gain	Unchanged	Unchanged	Gain
RP11-399E6.4	chr1	41835241	41849294	ENSG00000229901	14054	*	7.64	8.73	7.78	9.02	7.01	151	247.11	406.57	440.82	206.47	232.87	606.33	430.9	143.45	115.05	1.09	0.00109	0.0393	0.14	0.699	0.84	1.38	0.000132	0.00794	0.97	0.00411	0.0122	41840675	41841341	-	1	926	TSS	FOXO6	6994	promoter-TSS	0.024623	0.571622	NR_135817	Gain	Unchanged	Gain	Unchanged
SULF2	chr20	46425189	46429652	ENSG00000196562	4464	*	4.97	6.37	6.36	5.77	5.1	35	27.77	100.17	65.82	94.86	69.47	64.99	43.79	33.66	34.95	1.4	0.00109	0.0393	1.39	0.0012	0.0487	0.79	0.085	0.296	0.53	0.216	0.29	46285655	46415330	-	20	12090	TSS	RNU7-173P	28292	Intergenic	0.014567	0.504145		Gain	Gain	Unchanged	Unchanged
MYH9	chr22	36744065	36759501	ENSG00000100345	15437	*	7.94	8.97	8.45	9.15	6.83	205	286.28	463.81	540.31	322.86	378.12	677.31	461.56	123.41	103.4	1.03	0.00109	0.0393	0.51	0.129	0.377	1.21	0.000499	0.0177	1.41	1.73e-05	0.000115	36677326	36784063	-	40	32280	TSS	RP4-633O19__A.1	32887	intron	0.017493	0.497733	NM_002473, intron 1 of 40	Gain	Unchanged	Gain	Gain
RP11-526I2.1	chr15	101093402	101100201	ENSG00000259540	6800	*	7.36	8.66	7.78	8.17	4.75	93	236.43	398.15	412.5	192.12	248.66	295.04	282.89	32.06	21.85	1.3	0.00112	0.0394	0.42	0.33	0.579	0.81	0.0504	0.226	2.75	8.69e-10	1.77e-08	101098881	101100003	+	2	2080	TSS	PRKXP1	2358	non-coding	0.070315	0.576702	NR_073405, exon 1 of 1	Gain	Unchanged	Unchanged	Gain
RP11-191L9.5	chr22	48084335	48090009	ENSG00000232897	5675	*	5.31	6.59	6.11	6.91	5.4	35	44.15	101.85	91.07	67.76	70.26	145.38	95.46	46.48	37.87	1.29	0.00111	0.0394	0.8	0.0579	0.26	1.61	7.71e-05	0.00577	0.55	0.171	0.241	48058307	48059352	-	1	27820	TSS	RP11-191L9.4	59750	intron	0.013749	0.497356	NR_122046, intron 6 of 8	Gain	Unchanged	Gain	Unchanged
RFX1	chr19	14086739	14098095	ENSG00000132005	11357	*	6.95	8.18	7.69	8.55	5.86	81	165.93	254.21	326.02	158.64	254.18	448.12	303.91	70.52	45.87	1.23	0.00111	0.0394	0.74	0.0747	0.292	1.61	4.92e-05	0.00419	1.39	0.000467	0.00197	14072349	14117097	-	20	20068	TTS	DCAF15	20163	intron	0.030383	0.603117	NM_002918, intron 5 of 20	Gain	Unchanged	Gain	Gain
AXIN2	chr17	63552065	63559542	ENSG00000168646	7478	*	5.72	6.95	7.72	7.69	6.29	43	62.67	125.42	121.68	155.45	266.02	230.9	182.17	85.75	70.63	1.23	0.00112	0.0394	2	6.76e-07	0.000685	1.97	1.08e-07	7.41e-05	0.13	0.718	0.763	63524680	63557765	-	10	1962	TSS	CTD-2535L24.2	21584	intron	0.053638	0.579912	NM_001363813, intron 1 of 9	Gain	Gain	Gain	Unchanged
PIF1	chr15	65107218	65117771	ENSG00000140451	10554	*	8.17	9.31	8.99	9.37	6.74	204	373.87	601.01	670.41	377.07	639.4	755.99	567.53	123.41	90.29	1.14	0.00111	0.0394	0.81	0.0415	0.225	1.2	0.0013	0.0298	1.66	4.23e-06	3.36e-05	65107830	65117867	-	12	4664	TTS	PLEKHO2	21592	intron	0.024829	0.549228	NM_001286499, intron 7 of 12	Gain	Unchanged	Gain	Gain
CTD-2349B8.1	chr16	19124756	19127619	ENSG00000261427	2864	*	6.9	7.99	7.86	7.52	4.49	97	141.72	235.69	273.21	204.88	261.29	210.38	156.77	28.85	16.02	1.09	0.00111	0.0394	0.97	0.00682	0.108	0.62	0.0856	0.298	2.53	2.11e-09	3.88e-08	19125323	19184900	+	5	864	TSS	ITPRIPL2	934	non-coding	0.075122	0.665386	NR_028028, exon 2 of 2	Gain	Unchanged	Unchanged	Gain
CDK13	chr7	39988455	39991972	ENSG00000065883	3518	*	7.53	8.65	8.19	7.91	5.38	136	234.29	379.63	422.45	239.15	344.17	265.96	214.58	44.88	38.59	1.12	0.00111	0.0394	0.66	0.0831	0.307	0.38	0.305	0.567	2.22	7.13e-09	1.17e-07	39989635	40136733	+	13	578	TSS	RP11-467D6.1	860	5' UTR	0.087884	0.644299	NM_031267, exon 1 of 14	Gain	Unchanged	Unchanged	Gain
BICD2	chr9	95476155	95482245	ENSG00000185963	6091	*	6.97	8.02	7.59	8.08	5.53	111	140.29	240.74	277.81	161.83	223.4	282.21	257.49	57.7	34.95	1.05	0.00113	0.0395	0.62	0.0819	0.306	1.1	0.000813	0.0234	1.59	3.69e-05	0.000223	95473644	95527094	-	7	5556	TTS	RP11-476B13.2	39511	intron	0.028083	0.586043	NM_001003800, intron 6 of 6	Gain	Unchanged	Gain	Gain
TXLNA	chr1	32643898	32648052	ENSG00000084652	4155	*	5.23	6.67	5.86	6.19	4.88	23	51.99	108.59	94.9	42.25	74.2	68.42	77.95	36.86	21.85	1.44	0.00113	0.0395	0.64	0.22	0.479	0.96	0.0405	0.201	1.1	0.0132	0.0314	32645286	32663886	+	10	689	TSS	KPNA6	3806	exon	0.037563	0.531295	NM_175852, exon 2 of 11	Gain	Unchanged	Unchanged	Gain
RNU6-1208P	chr1	25122973	25127703	ENSG00000238482	4731	*	6.1	7.4	6.98	7.13	4.2	44	93.29	156.57	180.61	102.04	150.77	135.12	144.51	18.43	18.2	1.3	0.00114	0.0397	0.88	0.0425	0.228	1.03	0.0127	0.108	2.08	7.3e-06	5.42e-05	25104363	25104470	-	0	20868	TSS	CLIC4	45477	intron	0.035314	0.541649	NM_013943, intron 2 of 5	Gain	Unchanged	Unchanged	Gain
SMEK1	chr14	91975273	91979271	ENSG00000100796	3999	*	6.95	8.02	7.59	7.81	4.31	100	146.7	261.79	258.67	156.25	228.13	261.69	188.3	20.84	18.93	1.08	0.00114	0.0397	0.64	0.0851	0.31	0.87	0.0158	0.122	2.71	5.99e-11	1.58e-09	91923954	91976644	-	15	628	TSS	AL133373.1	61515	promoter-TSS	0.063548	0.56028	NM_001284280	Gain	Unchanged	Unchanged	Gain
LGALS3BP	chr17	76961607	76975642	ENSG00000108679	14036	*	8.15	9.16	8.93	9.37	7.07	241	328.29	556.4	586.22	420.91	554.94	786.78	534.25	141.04	127.43	1.01	0.00115	0.0397	0.78	0.0232	0.179	1.21	0.000466	0.0169	1.44	6.54e-06	4.92e-05	76967319	76976191	-	5	1306	TTS	CANT1	19174	exon	0.028502	0.582686	NM_005567, exon 6 of 6	Gain	Unchanged	Gain	Gain
RP11-416N2.4	chr10	105451626	105454696	ENSG00000273108	3071	*	4.67	6.17	5.29	5.51	4.46	18	32.76	73.23	70.41	27.9	50.52	44.47	46.42	28.05	16.02	1.5	0.00115	0.0398	0.63	0.263	0.52	0.84	0.103	0.327	0.67	0.175	0.245	105368375	105369807	+	0	83354	TTS	SH3PXD2A	99378	intron	0.043337	0.604886	NM_014631, intron 5 of 13	Gain	Unchanged	Unchanged	Unchanged
MESDC1	chr15	81292098	81295794	ENSG00000140406	3697	*	7.57	8.77	8.56	7.64	5.32	132	249.25	359.43	512.75	341.99	415.22	210.38	189.18	45.68	34.22	1.19	0.00117	0.0404	0.99	0.00863	0.119	0.07	0.866	0.94	2.37	2.08e-09	3.83e-08	81293294	81296342	+	0	652	TSS	MIR4514	4132	5' UTR	0.097429	0.666937	NM_022566, exon 1 of 1	Gain	Unchanged	Unchanged	Gain
GTF3C5	chr9	135915992	135920377	ENSG00000148308	4386	*	4.84	6.26	5.71	5.58	4.44	23	34.18	80.81	71.94	59.79	45	50.46	45.54	27.25	16.02	1.42	0.00118	0.0404	0.87	0.0708	0.285	0.75	0.123	0.36	1.25	0.00699	0.0188	135906075	135933888	+	11	12110	TSS	CEL	19180	intron	0.018932	0.518358	NM_012087, intron 2 of 10	Gain	Unchanged	Unchanged	Gain
DUSP2	chr2	96808731	96811986	ENSG00000158050	3256	*	5.87	7.27	7.11	6.23	5.23	32	84.74	144.78	163.78	144.29	131.83	77.82	72.69	39.27	35.68	1.4	0.00118	0.0405	1.24	0.0055	0.0988	0.37	0.449	0.69	1.01	0.0189	0.0419	96808904	96811179	-	3	820	TSS	AC012307.2	982	intron	0.052243	0.633487	NM_004418, intron 2 of 3	Gain	Gain	Unchanged	Gain
ZYX	chr7	143081691	143085868	ENSG00000159840	4178	*	6.25	7.38	5.47	6.67	4.1	64	88.3	167.51	165.31	36.67	52.1	114.6	89.33	17.63	16.75	1.13	0.0012	0.0409	-0.78	0.0641	0.273	0.42	0.273	0.536	2.29	1.44e-07	1.7e-06	143078172	143088204	+	9	4424	TTS	EPHA1	4424	intron	0.02227	0.559492	NM_003461, intron 5 of 9	Gain	Unchanged	Unchanged	Gain
MIR5189	chr16	88539683	88555848	ENSG00000263456	16166	*	7.73	8.9	8.59	8.94	7.08	161	262.78	360.27	597.7	288.58	482.32	571.27	408.13	147.45	122.33	1.18	0.00125	0.0413	0.86	0.025	0.184	1.21	0.000804	0.0233	0.95	0.00483	0.0139	88535325	88535439	+	0	12326	TTS	ZFPM1	28042	intron	0.034397	0.633034	NM_153813, intron 1 of 9	Gain	Unchanged	Gain	Unchanged
RP11-568J23.6	chr16	85826329	85831472	ENSG00000270159	5144	*	5.38	6.7	5.57	6.38	4.8	33	50.56	118.69	89.54	45.44	49.73	86.37	79.7	34.46	21.12	1.32	0.00122	0.0413	0.19	0.696	0.838	0.99	0.0178	0.13	1.09	0.0134	0.0318	85826020	85826539	+	1	2362	TTS	EMC8	4314	intron	0.017114	0.484737	NM_001142288, intron 1 of 3	Gain	Unchanged	Unchanged	Gain
FBRSL1	chr12	133088269	133092073	ENSG00000112787	3805	*	4.59	6.27	6.02	6.36	4.64	12	36.32	62.29	91.84	51.82	78.15	98.35	65.69	27.25	22.57	1.67	0.00122	0.0413	1.43	0.00845	0.118	1.76	0.000653	0.0209	0.45	0.359	0.433	133066136	133161774	+	17	24035	TSS	MUC8	39445	intron	0.026295	0.597003	NM_001142641, intron 2 of 16	Gain	Unchanged	Gain	Unchanged
RP11-848P1.5	chr17	29419746	29425838	ENSG00000264107	6093	*	6.36	7.63	6.94	6.39	5.2	51	113.23	196.13	201.28	133.93	112.09	84.66	83.2	38.47	34.95	1.27	0.00124	0.0413	0.58	0.174	0.429	0.03	0.961	0.984	1.5	0.000277	0.00127	29417804	29422468	-	2	324	TSS	NF1	848	intron	0.027418	0.481779	NM_001128147, intron 1 of 14	Gain	Unchanged	Unchanged	Gain
KLHL17	chr1	893780	903746	ENSG00000187961	9967	*	6.51	7.83	7.71	8.27	6.24	54	128.9	201.18	252.55	174.58	245.5	348.06	269.75	90.56	60.44	1.31	0.00122	0.0413	1.2	0.00497	0.0949	1.76	1.86e-05	0.00238	0.66	0.102	0.16	895966	901095	+	11	2332	TTS	PLEKHN1	3113	exon	0.070547	0.676801	NM_198317, exon 8 of 12	Gain	Gain	Gain	Unchanged
RP11-244F12.3	chr15	63344081	63347109	ENSG00000259498	3029	*	5.86	7.03	6.51	5.88	4.2	51	64.8	139.73	121.68	98.05	83.67	65.85	51.67	20.84	16.02	1.17	0.00124	0.0413	0.65	0.0969	0.329	0.02	0.968	0.987	2.01	4.03e-06	3.22e-05	63338232	63341586	-	1	4009	TSS	TPM1	10712	intron	0.010902	0.46004	NM_001301289, intron 1 of 7	Gain	Unchanged	Unchanged	Gain
TGFBR1	chr9	101866380	101870238	ENSG00000106799	3859	*	5.4	6.68	5.62	5.81	4.97	34	50.56	106.9	98.72	39.06	59.2	70.13	42.04	38.47	24.03	1.28	0.00123	0.0413	0.22	0.654	0.813	0.41	0.385	0.638	0.84	0.0548	0.0977	101867370	101916474	+	8	939	TSS	COL15A1	35240	intron	0.054965	0.552359	NM_001130916, intron 1 of 7	Gain	Unchanged	Unchanged	Unchanged
CSNK1D	chr17	80225121	80233117	ENSG00000141551	7997	*	8.8	9.95	8.92	9.46	6.2	310	580.39	934.35	1046.94	370.69	595.2	795.33	615.7	85.75	61.17	1.15	0.00124	0.0413	0.12	0.771	0.882	0.66	0.0765	0.283	2.72	4.03e-13	1.78e-11	80197602	80231304	-	9	2185	TSS	SLC16A3	10114	intron	0.036398	0.563907	NM_139062, intron 1 of 9	Gain	Unchanged	Unchanged	Gain
KIAA1143	chr3	44799143	44803346	ENSG00000163807	4204	*	5.78	6.95	6.81	6.42	4.97	54	56.26	131.31	115.56	114.79	109.72	76.11	95.46	32.86	29.86	1.16	0.00125	0.0413	1.03	0.00586	0.102	0.64	0.1	0.322	1.33	0.00086	0.00332	44779152	44803003	-	3	1758	TSS	KIF15	1964	intron	0.026892	0.459672	NM_001320334, intron 1 of 2	Gain	Unchanged	Unchanged	Gain
RRP9	chr3	51968212	51974356	ENSG00000114767	6145	*	6.41	7.64	6.23	7.11	5.38	56	113.94	200.34	199.74	49.43	100.25	164.2	112.1	52.09	31.31	1.24	0.00123	0.0413	-0.18	0.681	0.829	0.7	0.0941	0.312	1.45	0.000439	0.00188	51967445	51975957	-	14	3839	TTS	PARP3	5076	exon	0.018395	0.546875	NM_004704, exon 6 of 15	Gain	Unchanged	Unchanged	Gain
RHOB	chr2	20645997	20649086	ENSG00000143878	3090	*	7.32	8.51	7.86	7.15	5.15	108	212.22	324.08	403.32	235.97	228.92	130.84	154.14	41.67	29.13	1.18	0.00123	0.0413	0.54	0.162	0.416	-0.17	0.652	0.828	2.29	2.88e-08	4.04e-07	20646834	20649200	+	0	708	TSS	AC023137.2	3260	exon	0.067358	0.598899	NM_004040, exon 1 of 1	Gain	Unchanged	Unchanged	Gain
RPLP2	chr11	808248	816891	ENSG00000177600	8644	*	7.14	8.21	7.84	7.77	5.21	112	170.91	297.98	295.41	197.7	259.71	199.26	236.47	43.27	30.58	1.07	0.00125	0.0413	0.69	0.0555	0.256	0.62	0.077	0.284	2.15	2.07e-08	3e-07	809646	812875	+	4	306	TTS	SNORA52	756	TTS	0.034598	0.562768	NR_002585	Gain	Unchanged	Unchanged	Gain
RP11-93B14.5	chr20	61285396	61303466	ENSG00000232803	18071	*	7.83	9.08	8.92	9.69	7.38	146	307.64	420.88	664.29	401.78	569.15	921.9	729.56	175.5	158.01	1.26	0.00127	0.0416	1.1	0.00622	0.105	1.86	1.66e-06	0.000463	0.85	0.0144	0.0337	61294370	61298076	-	3	61	TTS	SLCO4A1	9216	TTS	0.032597	0.603708	NR_024470	Gain	Unchanged	Gain	Unchanged
HTRA1	chr10	124219883	124225815	ENSG00000166033	5933	*	5.74	6.97	6.83	7.25	5.64	43	64.09	113.64	136.99	119.58	107.36	173.6	131.37	48.88	50.97	1.23	0.00128	0.0416	1.08	0.0058	0.101	1.51	8.63e-05	0.0062	0.82	0.0284	0.0578	124221040	124274424	+	8	1809	TSS	ARMS2	5981	intron	0.053954	0.582434	NM_002775, intron 1 of 8	Gain	Unchanged	Gain	Unchanged
SUV420H1	chr11	67979522	67982039	ENSG00000110066	2518	*	5.7	6.99	6.44	6.84	4.53	38	66.23	110.27	143.88	64.57	108.94	112.89	115.61	26.45	19.66	1.29	0.00127	0.0416	0.74	0.101	0.336	1.13	0.00494	0.0647	1.45	0.00117	0.00429	67922329	67980882	-	11	102	TSS	C11orf24	48022	promoter-TSS	0.111288	0.676996	NM_001369431	Gain	Unchanged	Gain	Gain
COLGALT1	chr19	17683347	17696269	ENSG00000130309	12923	*	7.51	8.56	8.22	8.63	5.97	155	210.08	324.92	430.1	255.9	341.8	464.37	325.8	62.51	62.62	1.05	0.00128	0.0416	0.71	0.0401	0.224	1.11	0.00124	0.0292	1.73	5.24e-07	5.35e-06	17666402	17693968	+	11	4160	TTS	CTD-3131K8.1	10595	intron	0.023837	0.549915	NM_024656, intron 9 of 11	Gain	Unchanged	Gain	Gain
MIR4669	chr9	137267959	137279274	ENSG00000263897	11316	*	7.09	8.15	7.57	8.24	6.55	116	155.96	247.48	319.9	165.81	214.71	346.35	257.49	110.59	76.46	1.06	0.0013	0.042	0.48	0.17	0.425	1.15	0.000809	0.0233	0.93	0.00812	0.0212	137271256	137271318	+	0	2298	TTS	RXRA	55192	intron	0.030493	0.644808	NM_001291920, intron 1 of 9	Gain	Unchanged	Gain	Unchanged
MEIS3	chr19	47907266	47920838	ENSG00000105419	13573	*	7.27	8.39	7.99	8.46	6.44	112	197.26	318.18	353.57	212.85	294.44	383.13	320.55	100.17	73.55	1.12	0.00129	0.042	0.71	0.0603	0.265	1.19	0.00106	0.0266	1.21	0.000748	0.00295	47906380	47922780	-	12	7672	TTS	SLC8A2	17221	intron	0.026159	0.550987	NM_001009813, intron 6 of 12	Gain	Unchanged	Gain	Gain
RP11-1035H13.3	chr16	18790640	18803046	ENSG00000260342	12407	*	7.63	8.77	8.68	8.41	5.89	142	254.94	484.85	385.71	419.32	398.64	335.23	346.82	72.12	46.6	1.13	0.0013	0.042	1.04	0.00428	0.0884	0.78	0.0303	0.173	1.97	2.26e-07	2.54e-06	18799384	18812841	-	6	2541	TTS	RPS15A	4227	intron	0.021524	0.473884	NM_001019, intron 3 of 4	Gain	Gain	Unchanged	Gain
CTNNB1	chr3	41238819	41242860	ENSG00000168036	4042	*	7.45	8.61	7.78	7.75	4.96	119	230.02	430.14	352.04	179.37	261.29	221.49	207.57	36.86	25.49	1.16	0.00131	0.0422	0.34	0.4	0.638	0.3	0.434	0.679	2.65	9.05e-11	2.29e-09	41236400	41280844	+	16	4440	TSS	RP11-372H2.1	30802	promoter-TSS	0.050248	0.498391	NM_001098209	Gain	Unchanged	Unchanged	Gain
NAPG	chr18	10525745	10528459	ENSG00000134265	2715	*	4.9	6.47	5.97	5.31	4.4	15	44.86	83.33	94.13	52.61	72.62	47.04	32.41	24.04	18.2	1.57	0.00132	0.0423	1.06	0.0457	0.236	0.41	0.491	0.723	1.12	0.02	0.0438	10526030	10552757	+	11	1072	TSS	APCDD1	37157	intron	0.043494	0.53353	NM_003826, intron 1 of 11	Gain	Unchanged	Unchanged	Gain
FBXO46	chr19	46219588	46224059	ENSG00000177051	4472	*	6.58	7.71	7.37	7.72	4.57	74	117.5	220.54	197.45	120.37	211.56	224.06	197.93	24.04	23.3	1.13	0.00132	0.0424	0.79	0.0503	0.245	1.14	0.00155	0.033	2.26	3.51e-08	4.84e-07	46213886	46234162	-	1	7938	TTS	QPCTL	14576	intron	0.025056	0.499665	NM_001329633, intron 1 of 1	Gain	Unchanged	Gain	Gain
CTD-2337A12.1	chr5	95295103	95298484	ENSG00000251314	3382	*	5.78	7.09	5.98	6.06	4.53	35	74.77	130.47	142.35	46.24	79.73	77.82	56.05	28.05	18.2	1.31	0.00137	0.0437	0.2	0.695	0.838	0.29	0.548	0.761	1.58	0.000536	0.00222	95297704	95966789	+	4	910	TSS	ELL2	982	promoter-TSS	0.057396	0.580006	NR_130776	Gain	Unchanged	Unchanged	Gain
STARD7	chr2	96872568	96878945	ENSG00000084090	6378	*	5.84	7.1	7.54	6.36	5.67	40	74.77	138.89	135.46	191.32	181.56	77.82	86.71	55.3	46.6	1.26	0.00137	0.0437	1.7	1.45e-05	0.0048	0.52	0.227	0.487	0.83	0.0308	0.0617	96850596	96874556	-	7	1200	TSS	STARD7-AS1	1604	intron	0.032622	0.499765	NR_046322, intron 1 of 3	Gain	Gain	Unchanged	Unchanged
NCOA1	chr2	24711999	24715207	ENSG00000084676	3209	*	4.57	6.2	5.75	4.86	4.95	12	35.61	75.76	71.17	43.05	64.73	25.66	32.41	32.86	29.13	1.63	0.00139	0.0441	1.18	0.0353	0.213	0.29	0.665	0.835	0.3	0.5	0.567	24714800	24993571	+	24	1197	TSS	RNA5SP88	73895	promoter-TSS	0.075772	0.598504	NM_001362950	Gain	Unchanged	Unchanged	Unchanged
RPL21P4	chr17	41242144	41246953	ENSG00000240828	4810	*	4.64	6.09	6.27	5.26	4.57	20	29.91	63.97	72.7	70.95	82.89	45.33	31.53	25.64	21.85	1.45	0.0014	0.0443	1.62	0.000328	0.0263	0.62	0.241	0.504	1.06	0.0172	0.0389	41231318	41231797	+	0	12752	TTS	BRCA1	32952	exon	0.008111	0.397796	NM_007297, exon 9 of 22	Gain	Gain	Unchanged	Gain
CHD4	chr12	6712010	6716850	ENSG00000111642	4841	*	5.38	6.66	5.25	6.68	5.48	33	50.56	103.54	98.72	19.93	56.05	118.02	86.71	54.49	34.95	1.28	0.00142	0.0447	-0.14	0.791	0.893	1.29	0.00182	0.036	0.57	0.163	0.231	6679248	6716590	-	39	2160	TSS	LPAR5	13570	intron	0.033891	0.576446	NM_001273, intron 2 of 39	Gain	Unchanged	Gain	Unchanged
ANKRD20A18P	chr21	15434104	15437535	ENSG00000249493	3432	*	4.61	6.06	5.38	5.85	4.59	21	27.77	58.08	75.77	35.08	48.15	72.69	42.92	25.64	22.57	1.46	0.00144	0.0449	0.77	0.134	0.382	1.25	0.0115	0.103	0.62	0.182	0.253	15436645	15441408	+	2	826	TSS	AP001347.6	36078	Intergenic	0.052478	0.595453		Gain	Unchanged	Unchanged	Unchanged
RP11-568J23.5	chr16	85814220	85819475	ENSG00000270184	5256	*	5.32	6.79	6.13	7	5.02	21	59.11	119.53	102.55	47.83	92.36	150.51	105.97	39.27	25.49	1.47	0.00144	0.0449	0.81	0.13	0.378	1.68	0.000338	0.014	0.93	0.0372	0.0717	85817987	85821223	+	1	1140	TSS	RNU1-103P	1342	intron	0.020746	0.507136	NM_001142288, intron 2 of 3	Gain	Unchanged	Gain	Unchanged
SNORA55	chr1	40021682	40043452	ENSG00000201457	21771	*	9.06	10.07	9.84	9.8	6.87	445	620.27	1106.91	1046.94	927.12	905.43	922.75	859.18	122.61	110.68	1.02	0.00143	0.0449	0.78	0.0216	0.173	0.74	0.0252	0.157	2.36	4.41e-13	1.93e-11	40033045	40033180	-	0	478	TTS	RP11-69E11.8	1736	TTS	0.023474	0.479972	NR_002983	Gain	Unchanged	Unchanged	Gain
CTD-2600O9.1	chr16	57834569	57836900	ENSG00000187185	2332	*	4.71	6.1	4.6	4.67	4.08	26	26.35	66.5	70.41	20.73	27.63	30.79	20.14	19.23	14.56	1.39	0.00146	0.0449	-0.11	0.836	0.917	-0.04	0.944	0.975	1.12	0.0246	0.0517	57832097	57847715	+	3	3638	TSS	KIFC3	30152	intron	0.054077	0.611755	NM_001318710, intron 1 of 19	Gain	Unchanged	Unchanged	Gain
ARHGEF19-AS1	chr1	16525126	16530293	ENSG00000234166	5168	*	5.65	6.96	6.2	6.39	4.59	33	67.65	118.69	130.87	60.59	86.04	106.9	61.31	32.86	15.29	1.31	0.00146	0.0449	0.54	0.243	0.502	0.74	0.113	0.342	1.43	0.00278	0.0088	16524348	16524852	+	1	2858	TTS	ARHGEF19	3112	intron	0.011227	0.548868	NM_153213, intron 14 of 15	Gain	Unchanged	Unchanged	Gain
FN3KRP	chr17	80673936	80676920	ENSG00000141560	2985	*	4.92	6.31	5.52	5.28	5.01	23	37.74	75.76	83.42	36.67	55.26	42.76	35.03	37.66	26.94	1.39	0.00145	0.0449	0.6	0.24	0.499	0.36	0.493	0.724	0.56	0.195	0.267	80674558	80685893	+	6	870	TSS	RP11-388C12.1	1297	intron	0.051626	0.590818	NM_024619, intron 1 of 5	Gain	Unchanged	Unchanged	Unchanged
C17orf85	chr17	3715906	3719078	ENSG00000074356	3173	*	4.67	6.11	5.88	6.16	4.04	23	27.77	56.4	81.89	50.22	67.89	74.4	68.31	24.84	8.01	1.45	0.00146	0.0449	1.22	0.00956	0.123	1.49	0.000763	0.0225	1.06	0.058	0.102	3714459	3749540	-	13	3033	TTS	CTD-3195I5.1	5344	intron	0.02176	0.458071	NM_001114118, intron 12 of 12	Gain	Unchanged	Gain	Unchanged
BLVRB	chr19	40952658	40959436	ENSG00000090013	6779	*	4.6	6.25	6.34	6.61	5.13	13	35.61	57.24	94.9	74.94	87.62	107.75	87.58	40.07	29.86	1.65	0.00145	0.0449	1.74	0.000486	0.0319	2.01	3.25e-05	0.00335	0.61	0.149	0.215	40953695	40971747	-	4	2352	TTS	SERTAD3	5435	intron	0.016526	0.5	NM_000713, intron 4 of 4	Gain	Gain	Gain	Unchanged
C20orf112	chr20	31064815	31072906	ENSG00000197183	8092	*	7.17	8.4	7.98	8.26	5.96	86	201.53	344.28	331.38	217.63	288.13	352.34	260.12	75.33	48.79	1.23	0.0015	0.0459	0.81	0.0504	0.246	1.09	0.00781	0.0831	1.54	0.000124	0.000638	31073339	31172630	-	7	4478	TTS	RP5-1184F4.5	27450	intron	0.041162	0.592387	NM_001256798, intron 4 of 10	Gain	Unchanged	Gain	Gain
RP11-133K1.7	chr15	40520911	40528203	ENSG00000260648	7293	*	5.93	7.09	7.39	6.58	5.12	52	69.79	152.36	120.92	200.89	134.2	102.62	89.33	38.47	31.31	1.17	0.00153	0.0463	1.46	0.000148	0.0172	0.66	0.0895	0.304	1.33	0.000666	0.00267	40524282	40528308	+	0	275	TSS	RP11-133K1.2	14908	intron	0.012893	0.486972	NM_001128629, intron 1 of 9	Gain	Gain	Unchanged	Gain
ENDOG	chr9	131580539	131594698	ENSG00000167136	14160	*	7.94	8.96	8.66	8.79	6.56	200	290.55	453.71	540.31	348.37	462.58	488.31	395.87	110.59	78.64	1.02	0.00152	0.0463	0.73	0.0381	0.219	0.85	0.0119	0.104	1.62	2.5e-06	2.12e-05	131580752	131584956	+	2	2662	TTS	C9orf114	4482	intron	0.034609	0.573416	NM_016390, intron 7 of 11	Gain	Unchanged	Unchanged	Gain
SNHG15	chr7	45022421	45030616	ENSG00000232956	8196	*	8.84	10.03	9.27	9.39	6.08	298	620.27	1043.78	1040.05	596.29	640.19	707.24	634.97	73.73	61.89	1.18	0.00153	0.0463	0.43	0.273	0.529	0.55	0.155	0.403	2.89	3.61e-14	2.04e-12	45022621	45026433	-	4	86	TSS	MYO1G	7822	promoter-TSS	0.019771	0.488591	NR_152597	Gain	Unchanged	Unchanged	Gain
SELM	chr22	31492210	31503490	ENSG00000198832	11281	*	8.28	9.33	9.12	9.57	6.38	251	371.74	556.4	727.81	470.34	639.4	858.61	660.37	89.75	76.46	1.04	0.00153	0.0463	0.83	0.0185	0.163	1.29	0.000188	0.00988	2.11	3.74e-10	8.26e-09	31500757	31516055	-	6	2907	TTS	RP3-412A9.12	11152	intron	0.027307	0.577305	NM_134269, intron 20 of 20	Gain	Unchanged	Gain	Gain
ENSA	chr1	150592209	150600738	ENSG00000143420	8530	*	6.49	7.61	7.06	7.42	5.53	71	108.24	214.65	175.25	131.53	135.77	173.6	169.03	36.86	55.34	1.12	0.00153	0.0463	0.58	0.123	0.368	0.93	0.00963	0.0929	1.34	0.000546	0.00225	150573326	150602042	-	4	5568	TSS	GOLPH3L	22226	3' UTR	0.008677	0.442021	NM_207047, exon 3 of 3	Gain	Unchanged	Unchanged	Gain
PANX2	chr22	50608187	50629659	ENSG00000073150	21473	*	7.92	9.16	9.09	9.27	7.79	142	341.83	521.89	621.43	418.52	672.56	673.04	565.78	270.87	170.39	1.24	0.00155	0.0467	1.17	0.0064	0.105	1.36	0.000822	0.0235	0.52	0.174	0.244	50609159	50618723	+	4	200	TTS	TRABD	5422	TTS	0.053747	0.65136	NR_027691	Gain	Unchanged	Gain	Unchanged
SLC25A39	chr17	42390474	42405543	ENSG00000013306	15070	*	7.72	8.82	8.67	9.08	7.06	152	269.19	410.78	491.33	353.15	460.21	598.63	481.7	149.86	116.51	1.1	0.00156	0.0467	0.95	0.0107	0.128	1.36	0.000176	0.00959	1.03	0.00285	0.009	42396992	42402238	-	11	1016	TTS	RUNDC3A	1970	non-coding	0.04181	0.591147	NR_159401, exon 8 of 11	Gain	Unchanged	Gain	Gain
HDAC4	chr2	240303860	240314609	ENSG00000068024	10750	*	7.06	8.12	7.81	7.96	6.07	106	160.23	301.35	254.85	199.3	251.02	295.9	201.44	71.32	63.35	1.06	0.00157	0.0468	0.76	0.0346	0.211	0.9	0.0134	0.112	1.33	0.00015	0.000748	239969863	240322643	-	26	13408	TSS	AC062017.1	13894	intron	0.027261	0.563029	NM_006037, intron 1 of 26	Gain	Unchanged	Unchanged	Gain
QPCTL	chr19	46201689	46207046	ENSG00000011478	5358	*	4.7	6.11	5.62	6	4.8	30	22.08	58.92	79.59	33.48	64.73	70.13	57.8	29.65	26.21	1.41	0.00156	0.0468	0.92	0.0724	0.288	1.3	0.00411	0.058	0.56	0.219	0.293	46195740	46207247	+	6	2880	TTS	SNRPD2	8776	intron	0.020164	0.521934	NM_001163377, intron 4 of 5	Gain	Unchanged	Gain	Unchanged
AC007193.9	chr19	46876428	46881418	ENSG00000268810	4991	*	6.34	7.42	6.97	7.76	4.85	74	88.3	154.04	189.03	94.86	155.51	252.28	181.29	27.25	30.58	1.08	0.00158	0.047	0.63	0.108	0.347	1.42	6.06e-05	0.0048	1.83	2.75e-06	2.31e-05	46885748	46886426	-	1	6825	TTS	PPP5C	17315	exon	0.019242	0.546493	NM_006247, exon 3 of 13	Gain	Unchanged	Gain	Gain
PIK3C2A	chr11	17096809	17099972	ENSG00000011405	3164	*	6.58	7.72	7.37	7.02	3.83	72	118.93	238.22	183.67	173.79	157.88	118.02	141.88	16.83	11.65	1.14	0.00159	0.047	0.8	0.0335	0.208	0.44	0.246	0.508	2.94	7.08e-11	1.84e-09	17099276	17229467	-	31	886	TTS	RPS13	944	promoter-TSS	0.035737	0.506481	NR_001452	Gain	Unchanged	Unchanged	Gain
AC024940.1	chr12	31475859	31479262	ENSG00000177340	3404	*	7.26	8.35	7.7	7.58	5.17	117	190.14	287.88	363.52	188.13	226.55	221.49	162.03	39.27	32.77	1.08	0.00161	0.0476	0.43	0.236	0.495	0.32	0.388	0.641	2.21	9.67e-09	1.54e-07	31477249	31478879	+	0	312	TSS	FAM60A	1746	non-coding	0.07672	0.587129	NR_026806, exon 1 of 1	Gain	Unchanged	Unchanged	Gain
QSOX2	chr9	139119940	139125359	ENSG00000165661	5420	*	6.01	7.12	6.8	7.42	4.86	60	69.08	133	144.64	98.05	124.72	205.25	136.63	37.66	20.39	1.1	0.00162	0.0476	0.79	0.0367	0.216	1.41	0.000156	0.00883	1.51	0.000381	0.00166	139098178	139137687	-	11	15038	TSS	WI2-1959D15.1	19174	intron	0.028239	0.517808	NM_181701, intron 1 of 11	Gain	Unchanged	Gain	Gain
COL5A1	chr9	137719207	137727736	ENSG00000130635	8530	*	6.45	7.58	7.26	7.39	5.85	67	108.24	180.14	202.04	145.09	161.03	197.55	137.5	73.73	41.51	1.12	0.00162	0.0476	0.8	0.0325	0.206	0.94	0.0149	0.119	0.94	0.0193	0.0425	137533619	137736686	+	65	13214	TTS	AL603650.2	17346	intron	0.031895	0.599015	NM_001278074, intron 64 of 65	Gain	Unchanged	Unchanged	Unchanged
SNORD1B	chr17	74551860	74566636	ENSG00000199961	14777	*	8.36	9.48	9.1	9.5	6.74	239	418.74	832.5	596.94	554.04	541.52	763.69	688.39	116.2	97.58	1.12	0.00166	0.0479	0.74	0.042	0.227	1.14	0.00138	0.031	1.85	9.44e-08	1.16e-06	74557190	74557274	+	0	1974	TTS	SNHG16	2177	non-coding	0.021523	0.489984	NR_038111, exon 3 of 3	Gain	Unchanged	Gain	Gain
RAB3IL1	chr11	61663155	61667967	ENSG00000167994	4813	*	4.99	6.4	6.79	7.21	5.43	26	37.74	63.13	105.61	97.26	123.93	190.71	105.97	49.69	36.41	1.4	0.00166	0.0479	1.79	1.69e-05	0.00505	2.22	2.47e-07	0.000122	0.37	0.365	0.439	61664772	61687741	-	9	789	TTS	FADS3	6038	3' UTR	0.023904	0.605985	NM_013401, exon 10 of 10	Gain	Gain	Gain	Unchanged
RP1-100J12.1	chr21	30396171	30398633	ENSG00000273254	2463	*	6.4	7.62	6.86	6.93	4.25	58	111.09	166.67	225.77	94.86	137.35	149.66	93.71	17.63	20.39	1.21	0.00164	0.0479	0.46	0.278	0.535	0.53	0.215	0.475	2.39	5.63e-08	7.35e-07	30396575	30397211	-	0	191	TSS	USP16	453	intron	0.036164	0.481722	NM_001001992, intron 1 of 17	Gain	Unchanged	Unchanged	Gain
SAFB	chr19	5621653	5627192	ENSG00000160633	5540	*	6.5	7.57	7.13	7.29	4.68	79	101.84	170.03	210.46	141.9	138.93	173.6	140.13	27.25	24.03	1.07	0.00163	0.0479	0.64	0.0751	0.293	0.79	0.0254	0.157	2.06	2.4e-07	2.67e-06	5623109	5668489	+	20	1314	TSS	SAFB2	1432	intron	0.048393	0.551544	NM_001201338, intron 1 of 20	Gain	Unchanged	Unchanged	Gain
ZNF787	chr19	56622591	56633582	ENSG00000142409	10992	*	8.77	9.88	9.07	9.22	6.23	302	568.28	934.35	956.63	409.75	667.03	667.9	521.11	92.16	58.25	1.12	0.00165	0.0479	0.31	0.444	0.671	0.45	0.229	0.49	2.65	4.83e-12	1.69e-10	56598731	56632649	-	2	4562	TSS	ZNF444	24468	intron	0.038308	0.595578	NM_001002836, intron 1 of 3	Gain	Unchanged	Unchanged	Gain
COL5A1	chr9	137668837	137671685	ENSG00000130635	2849	*	4.85	6.27	6.25	5.91	4.07	20	37.74	77.44	77.3	59.79	92.36	71.84	48.17	17.63	16.02	1.42	0.00165	0.0479	1.4	0.00346	0.0797	1.06	0.0323	0.179	1.42	0.0033	0.0101	137533619	137736686	+	65	66425	TTS	AL603650.2	70557	intron	0.025992	0.583919	NM_001278074, intron 27 of 65	Gain	Gain	Unchanged	Gain
LY6E	chr8	144097950	144108986	ENSG00000160932	11037	*	7.76	8.91	9.25	9.35	7.46	149	284.85	409.09	551.79	467.15	750.71	744.02	561.4	188.32	163.11	1.15	0.00165	0.0479	1.49	0.000193	0.0197	1.59	2.45e-05	0.0028	0.72	0.0331	0.0654	144099969	144105249	+	4	1781	TTS	RP11-273G15.2	3661	3' UTR	0.032533	0.626858	NM_002346, exon 4 of 4	Gain	Gain	Gain	Unchanged
AZI1	chr17	79156537	79175953	ENSG00000141577	19417	*	8.71	9.77	9.5	10.07	7.74	338	502.06	739.06	1007.91	544.48	903.85	1230.62	918.73	246.82	180.59	1.06	0.00168	0.0485	0.79	0.0376	0.218	1.36	0.000119	0.00744	1.27	0.000159	0.00079	79163395	79196799	-	25	2850	TTS	RP11-455O6.2	4947	intron	0.034406	0.625103	NM_001319229, intron 19 of 24	Gain	Unchanged	Gain	Gain
RN7SL202P	chr19	3901073	3914387	ENSG00000266627	13315	*	8.4	9.48	9.36	9.45	5.85	244	430.84	689.4	733.93	618.61	699.4	744.02	657.74	58.5	56.8	1.08	0.0017	0.0489	0.97	0.00832	0.118	1.05	0.00329	0.0513	2.71	4.48e-14	2.47e-12	3920246	3920504	-	0	12516	TTS	ATCAY	20347	intron	0.027116	0.522983	NM_033064, intron 4 of 12	Gain	Unchanged	Gain	Gain
MSH4	chr1	76260292	76264132	ENSG00000057468	3841	*	4.61	6.11	6.59	6.05	3.81	16	32.76	75.76	62.76	104.43	87.62	64.14	68.31	12.82	15.29	1.51	0.00172	0.0492	1.98	1.68e-05	0.00505	1.44	0.003	0.0485	1.6	0.00154	0.00541	76262566	76378923	+	19	354	TSS	RABGGTB	1448	promoter-TSS	0.019015	0.447917	NM_002440	Gain	Gain	Gain	Gain
MDFI	chr6	41619041	41623364	ENSG00000112559	4324	*	5.21	6.63	6.31	7.14	5.03	23	51.27	81.65	117.09	54.21	104.99	153.08	129.62	36.06	29.13	1.42	0.00172	0.0492	1.1	0.0282	0.193	1.93	6.94e-06	0.0012	0.81	0.0603	0.105	41604805	41621977	+	5	774	TTS	NPM1P51	13440	exon	0.020824	0.564423	NM_001300805, exon 4 of 4	Gain	Unchanged	Gain	Unchanged
ARHGAP19-SLIT1	chr10	99048425	99052065	ENSG00000269891	3641	*	5.31	6.66	5.54	5.68	4.51	26	53.41	110.27	92.6	38.26	54.47	41.9	60.43	21.64	24.03	1.35	0.00173	0.0493	0.22	0.672	0.824	0.37	0.47	0.707	1.17	0.011	0.0271	98757794	99052384	-	46	2139	TSS	ARHGAP19	2168	intron	0.025831	0.473626	NM_032900, intron 1 of 11	Gain	Unchanged	Unchanged	Gain
RPS26P21	chr3	119015199	119017941	ENSG00000242829	2743	*	4.8	6.14	5.14	5.31	4.63	28	27.77	66.5	75	27.9	42.63	42.76	36.78	24.84	24.76	1.34	0.00176	0.0497	0.34	0.509	0.716	0.51	0.294	0.556	0.8	0.0781	0.129	119017511	119017859	+	0	941	TSS	ARHGAP31	3351	intron	0.008756	0.46353	NM_020754, intron 1 of 11	Gain	Unchanged	Unchanged	Unchanged
THOP1	chr19	2800983	2819394	ENSG00000172009	18412	*	8.22	9.33	9.18	9.41	6.53	221	376.72	531.99	752.3	471.13	689.13	756.84	599.94	109.79	75	1.1	0.00176	0.0497	0.96	0.011	0.13	1.18	0.000975	0.0256	1.85	3.57e-07	3.81e-06	2785457	2813599	+	12	3410	TTS	ZNF554	9682	intron	0.038838	0.602031	NM_003249, intron 9 of 12	Gain	Unchanged	Gain	Gain
RRBP1	chr20	17637051	17642457	ENSG00000125844	5407	*	6.03	7.22	6.43	7.31	4.86	47	83.32	148.15	149.23	73.34	99.46	171.04	146.26	39.27	18.93	1.19	0.00176	0.0497	0.41	0.343	0.591	1.28	0.000949	0.0253	1.56	0.000454	0.00193	17594322	17662940	-	25	23186	TSS	BANF2	34562	exon	0.012951	0.493156	NM_001365613, exon 3 of 25	Gain	Unchanged	Gain	Gain
BAI1	chr8	143552513	143607138	ENSG00000181790	54626	*	9.58	10.83	10.75	11.36	9.58	490	1039.72	1584.18	2044.9	1415.79	2031.88	3068.43	2179.91	832.63	693.22	1.25	0.00178	0.0499	1.17	0.0063	0.105	1.78	3.11e-05	0.00329	0.51	0.16	0.228	143530790	143626370	+	30	46544	TTS	MROH4P	68794	intron	0.027607	0.61827	NM_001702, intron 17 of 30	Gain	Unchanged	Gain	Unchanged
DDAH1	chr1	86039470	86044355	ENSG00000153904	4886	*	7.04	8.09	7.91	8.09	4.71	103	160.23	268.52	276.28	247.92	234.45	281.36	262.75	30.45	21.85	1.05	0.00178	0.0499	0.87	0.0136	0.143	1.05	0.00257	0.0442	2.51	4.16e-10	9.07e-09	85784163	86043933	-	6	2020	TSS	RP11-290M5.4	2270	intron	0.032965	0.508086	NM_001134445, intron 1 of 6	Gain	Unchanged	Gain	Gain
AP003419.11	chr11	67131355	67143303	ENSG00000256514	11949	*	8.48	9.61	9.23	8.91	6.58	244	468.59	687.71	877.81	510.2	690.71	522.52	441.41	108.99	82.28	1.14	0.00177	0.0499	0.75	0.0517	0.248	0.44	0.242	0.505	2.07	1.84e-08	2.7e-07	67119042	67141055	-	3	3726	TSS	CLCF1	3879	intron	0.031221	0.598343	NM_001166212, intron 1 of 2	Gain	Unchanged	Unchanged	Gain
RP11-498B4.5	chr10	118454132	118457671	ENSG00000232767	3540	*	4.67	6.07	5.04	6	3.57	23	27.77	76.6	58.16	23.12	42.63	77.82	49.92	12.02	11.65	1.41	0.00181	0.05	0.37	0.501	0.711	1.33	0.00466	0.0628	1.69	0.0013	0.00469	118429613	118432250	+	2	23652	TTS	HSPA12A	25200	intron	0.016676	0.499011	NM_001330164, intron 6 of 12	Gain	Unchanged	Gain	Gain
CTD-2528A14.5	chr19	17217420	17224072	ENSG00000269066	6653	*	5.98	7.21	7.08	7.71	4.43	51	75.49	111.95	183.67	121.17	149.98	213.8	204.94	25.64	17.48	1.22	0.00181	0.05	1.1	0.00414	0.087	1.73	1.53e-06	0.000448	1.98	3.75e-06	3.03e-05	17206227	17210117	-	1	10629	TSS	MYO9B	34156	intron	0.022703	0.545851	NM_004145, intron 2 of 39	Gain	Gain	Gain	Gain
NAT6	chr3	50323516	50341140	ENSG00000243477	17625	*	8.78	9.84	9.45	9.57	7.3	327	553.33	921.72	913.01	587.52	813.86	774.8	750.58	188.32	125.97	1.06	0.00182	0.05	0.67	0.0729	0.289	0.79	0.0246	0.155	1.7	1.85e-06	1.63e-05	50333832	50336847	-	2	1504	TTS	IFRD2	1979	exon	0.02474	0.586586	NM_001200029, exon 2 of 4	Gain	Unchanged	Unchanged	Gain
MIR4722	chr16	88769891	88797277	ENSG00000265672	27387	*	9.62	10.78	10.86	10.54	7.7	573	1001.98	1517.69	2005.1	1476.38	2230.02	1674.46	1307.6	235.61	179.86	1.16	0.00179	0.05	1.23	0.00259	0.0691	0.92	0.0152	0.119	2.08	7.13e-09	1.17e-07	88782685	88782745	-	0	839	TSS	RP5-1142A6.9	1438	promoter-TSS	0.040606	0.61484	NR_039873	Gain	Gain	Unchanged	Gain
SMOX	chr20	4148112	4156051	ENSG00000088826	7940	*	6.09	7.41	6.88	7.28	5.57	39	97.56	152.36	188.27	114.79	120.78	184.72	126.12	53.69	41.51	1.32	0.0018	0.05	0.79	0.0772	0.296	1.19	0.00738	0.0805	0.94	0.0238	0.0502	4101626	4155751	+	8	3670	TTS	RP4-779E11.3	21630	intron	0.023054	0.553218	NM_175839, intron 1 of 6	Gain	Unchanged	Gain	Unchanged
RP11-229P13.23	chr9	139956487	139965782	ENSG00000231864	9296	*	7.29	8.3	8.45	8.78	6.24	138	175.19	272.73	356.63	289.38	410.48	517.39	359.09	84.95	66.26	1.01	0.00182	0.05	1.16	0.000832	0.0422	1.48	1.42e-05	0.00193	1.27	0.000224	0.00106	139957986	139959033	+	1	2102	TTS	SAPCD2	3906	intron	0.041532	0.634427	NM_178448, intron 1 of 5	Gain	Gain	Gain	Gain
NT5DC2	chr3	52561097	52569063	ENSG00000168268	7967	*	6.8	7.92	7.65	7.79	5.94	82	141	213.81	271.68	160.23	240.76	241.16	201.44	68.92	53.88	1.12	0.0018	0.05	0.85	0.0303	0.199	0.99	0.00726	0.0799	1.19	0.00144	0.00511	52558402	52569070	-	13	3990	TSS	SMIM4	5540	intron	0.040176	0.622521	NM_022908, intron 1 of 13	Gain	Unchanged	Unchanged	Gain
RP11-552F3.9	chr17	73870007	73875212	ENSG00000267801	5206	*	6.99	8.23	7.49	7.83	6.17	77	178.03	258.42	341.33	148.28	211.56	248.01	207.57	88.15	56.07	1.23	0.00184	0.0501	0.5	0.245	0.504	0.84	0.0398	0.2	1.14	0.00451	0.0132	73872452	73875627	+	0	158	TSS	TRIM47	2046	intron	0.053805	0.65072	NM_033452, intron 2 of 5	Gain	Unchanged	Unchanged	Gain
LA16c-306E5.3	chr16	3506390	3512092	ENSG00000263212	5703	*	7.11	8.27	7.52	7.29	5.75	92	185.16	286.2	329.08	158.64	209.19	159.92	152.39	64.91	42.96	1.15	0.00183	0.0501	0.41	0.31	0.563	0.17	0.669	0.837	1.57	8.98e-05	0.000481	3508070	3565564	+	4	1171	TSS	NAA60	27712	intron	0.035783	0.522974	NM_001317095, intron 1 of 5	Gain	Unchanged	Unchanged	Gain
CDCA8	chr1	38156727	38162299	ENSG00000134690	5573	*	6.1	7.25	6.68	6.9	5	57	80.47	172.56	130.87	101.24	103.41	120.58	118.24	37.66	26.21	1.14	0.00184	0.0501	0.57	0.135	0.384	0.8	0.033	0.181	1.52	0.000166	0.000817	38158089	38175391	+	10	1424	TSS	C1orf109	1625	intron	0.029797	0.500359	NM_018101, intron 3 of 10	Gain	Unchanged	Unchanged	Gain
ZNF319	chr16	58023933	58031473	ENSG00000166188	7541	*	5.02	6.51	7.18	6.4	5.75	18	47	74.92	107.91	133.13	157.88	101.77	67.44	53.69	53.88	1.49	0.00185	0.0502	2.16	1.62e-06	0.00113	1.38	0.00507	0.0655	-0.06	0.904	0.923	58028571	58033762	-	1	868	TTS	USB1	5746	TTS	0.02507	0.574138	NM_020807	Gain	Gain	Gain	Unchanged
PSTPIP1	chr15	77326960	77332620	ENSG00000140368	5661	*	5.51	6.72	7.42	7.15	5.48	39	51.99	94.28	116.33	156.25	187.08	175.31	109.48	54.49	34.95	1.21	0.00186	0.0504	1.92	3.38e-07	0.000427	1.65	4.12e-05	0.00378	0.79	0.0485	0.0886	77287020	77329642	+	15	148	TTS	RP11-797A18.4	4387	TTS	0.018378	0.582332	NM_001321136	Gain	Gain	Gain	Unchanged
AMER1	chrX	63405897	63413748	ENSG00000184675	7852	*	6.64	7.68	7.21	7.85	4.6	84	115.37	217.17	194.39	141.9	153.93	255.7	204.94	30.45	18.2	1.05	0.00188	0.0505	0.57	0.113	0.353	1.21	0.000522	0.0182	2.31	2.19e-08	3.17e-07	63404996	63425624	-	2	4826	TTS	RN7SL799P	20746	exon	0.008917	0.512164	NM_152424, exon 2 of 2	Gain	Unchanged	Gain	Gain
LRSAM1	chr9	130231510	130235614	ENSG00000148356	4105	*	4.66	6.08	5.14	6.09	4.02	22	28.49	77.44	57.4	27.9	42.63	70.13	66.56	11.22	21.12	1.42	0.00187	0.0505	0.48	0.368	0.612	1.44	0.00139	0.0311	1.2	0.0217	0.0466	130213764	130265780	+	25	19798	TSS	RPL12	19878	intron	0.017792	0.454191	NM_001190723, intron 10 of 24	Gain	Unchanged	Gain	Gain
AXIN1	chr16	401645	406367	ENSG00000103126	4723	*	5.86	7.12	6.25	6.09	5.62	38	78.33	134.68	143.11	52.61	99.46	83.81	52.55	57.7	40.78	1.26	0.00187	0.0505	0.39	0.425	0.657	0.23	0.634	0.816	0.6	0.144	0.209	337439	402659	-	10	1347	TSS	MRPL28	13377	Intergenic	0.061004	0.654596		Gain	Unchanged	Unchanged	Unchanged
CD81-AS1	chr11	2397982	2405403	ENSG00000238184	7422	*	7.28	8.44	7.44	7.98	5.38	100	211.5	324.92	371.94	137.91	208.4	295.9	209.32	44.08	39.32	1.16	0.0019	0.0506	0.15	0.721	0.853	0.7	0.0819	0.292	2.01	8.99e-07	8.64e-06	2349978	2399222	-	2	2470	TSS	CD81	3170	intron	0.040566	0.648295	NM_004356, intron 1 of 7	Gain	Unchanged	Unchanged	Gain
CBX4	chr17	77807244	77815673	ENSG00000141582	8430	*	7.13	8.32	7.97	8.56	6.66	86	193.7	302.19	337.5	180.16	322.86	419.04	337.19	126.62	75.73	1.19	0.00189	0.0506	0.85	0.0515	0.248	1.43	0.000308	0.0131	0.84	0.0333	0.0658	77806954	77813228	-	4	1770	TSS	RP11-353N14.2	9956	intron	0.07214	0.654882	NM_003655, intron 3 of 4	Gain	Unchanged	Gain	Unchanged
ETHE1	chr19	44014802	44020189	ENSG00000105755	5388	*	4.67	6.21	6.59	6.57	4.78	14	37.03	75.76	71.94	105.23	87.62	92.36	98.09	28.85	26.21	1.53	0.0019	0.0506	1.92	6.89e-05	0.0114	1.9	6.66e-05	0.00513	0.91	0.0376	0.0722	44010870	44031396	-	6	6626	TTS	PHLDB3	8408	intron	0.010212	0.461481	NM_001320869, intron 1 of 4	Gain	Gain	Gain	Unchanged
LIMS1	chr2	109198374	109204186	ENSG00000169756	5813	*	5.74	6.98	6.81	6.62	5.38	37	69.79	134.68	118.62	94.86	130.25	112.03	84.08	48.88	34.22	1.25	0.00189	0.0506	1.08	0.0115	0.131	0.88	0.0402	0.201	0.86	0.036	0.0699	109150856	109301046	+	9	50424	TSS	AC012487.2	50628	intron	0.014627	0.452512	NM_001193483, intron 1 of 9	Gain	Unchanged	Unchanged	Unchanged
NELFCD	chr20	57553868	57559924	ENSG00000101158	6057	*	7.66	8.89	8.32	8.22	5.6	115	289.13	449.5	499.74	271.04	368.64	358.33	239.97	58.5	38.59	1.23	0.00192	0.0508	0.66	0.12	0.364	0.57	0.186	0.443	2.2	0.000543	0.00224	57556262	57570188	+	15	634	TSS	CTSZ	13343	intron	0.037159	0.524934	NM_198976, intron 1 of 14	Gain	Unchanged	Unchanged	Gain
AC074389.9	chr7	1754681	1761616	ENSG00000236081	6936	*	7.15	8.15	8.05	8.5	6.7	118	165.22	267.68	301.53	232.78	296.81	440.42	285.52	117.8	89.57	1.01	0.00194	0.0509	0.9	0.00969	0.123	1.36	0.000151	0.00867	0.86	0.0117	0.0285	1778265	1781908	-	1	20116	TTS	ELFN1	29442	intron	0.019902	0.580389	NM_001128636, intron 2 of 2	Gain	Unchanged	Gain	Unchanged
MATN1-AS1	chr1	31189957	31195844	ENSG00000186056	5888	*	6.4	7.61	7.22	6.88	5.41	54	115.37	196.97	194.39	149.07	149.98	124.86	111.23	54.49	30.58	1.21	0.00193	0.0509	0.82	0.0461	0.237	0.48	0.254	0.516	1.29	0.00282	0.00891	31191350	31199591	+	3	1550	TSS	MATN1	3534	intron	0.039755	0.591982	NR_034182, intron 1 of 3	Gain	Unchanged	Unchanged	Gain
AL590235.1	chr4	3507091	3518024	ENSG00000268781	10934	*	6.27	7.46	7.34	8.19	5.71	52	101.84	162.46	189.8	121.97	202.08	324.12	259.24	56.9	48.06	1.2	0.00194	0.0509	1.07	0.0113	0.131	1.92	5.55e-07	0.000214	0.87	0.0268	0.0553	3511522	3511678	-	0	880	TSS	LRPAP1	4456	non-coding	0.03476	0.542852	NR_110005, exon 8 of 8	Gain	Unchanged	Gain	Unchanged
JADE2	chr5	133899332	133905007	ENSG00000043143	5676	*	6.11	7.32	6.69	6.58	5.09	53	85.46	125.42	193.62	71.75	134.2	113.74	77.07	41.67	26.21	1.2	0.00194	0.0509	0.57	0.189	0.445	0.46	0.263	0.527	1.38	0.000887	0.00341	133861797	133918918	+	11	16748	TTS	SAR1B	39948	exon	0.016743	0.55859	NM_015288, exon 9 of 11	Gain	Unchanged	Unchanged	Gain
NSUN2	chr5	6629500	6634992	ENSG00000037474	5493	*	7.83	8.93	8.22	7.82	5.74	156	298.39	462.12	511.99	279.81	317.33	246.3	204.94	61.71	45.15	1.1	0.00194	0.0509	0.39	0.298	0.553	-0.01	0.97	0.987	2.29	1.93e-09	3.58e-08	6599351	6633404	-	18	1158	TSS	SRD5A1	1209	intron	0.044801	0.514749	NM_017755, intron 2 of 18	Gain	Unchanged	Unchanged	Gain
EGR3	chr8	22551558	22553630	ENSG00000179388	2073	*	5.06	6.41	5.63	3.96	3.81	27	39.88	101.01	68.88	57.4	41.84	17.1	14.01	19.23	8.74	1.34	0.00196	0.0512	0.57	0.237	0.496	-1.1	0.0552	0.237	1.46	0.00634	0.0174	22545171	22550815	-	2	1779	TSS	RP11-459E5.1	4932	Intergenic	0.070497	0.67471		Gain	Unchanged	Unchanged	Gain
AP001065.2	chr21	45824309	45827879	ENSG00000230061	3571	*	5.97	7.33	6.47	6.86	5.41	33	92.58	146.47	176.02	77.33	100.25	131.7	99.84	56.1	29.13	1.36	0.00197	0.0514	0.5	0.302	0.556	0.88	0.0577	0.244	0.84	0.229	0.302	45834472	45845155	-	2	8378	TTS	TRPM2	36870	intron	0.027459	0.540896	NM_001320351, intron 18 of 30	Gain	Unchanged	Unchanged	Unchanged
AC000081.2	chr22	19226620	19233204	ENSG00000230194	6585	*	6.61	7.64	7.27	6.84	5.93	86	108.96	182.66	215.82	153.86	155.51	129.99	98.97	64.11	57.53	1.03	0.00201	0.0516	0.67	0.0574	0.259	0.23	0.53	0.75	1.11	0.00168	0.00581	19225965	19226262	-	0	3650	TSS	CLTCL1	49325	intron	0.01671	0.486482	NM_001835, intron 4 of 31	Gain	Unchanged	Unchanged	Gain
PDGFB	chr22	39600098	39604442	ENSG00000100311	4345	*	5.68	6.95	6.46	5.43	5.45	36	66.23	101.85	145.41	87.69	88.41	49.6	36.78	51.29	36.41	1.27	0.002	0.0516	0.78	0.0663	0.276	-0.24	0.587	0.787	0.7	0.0876	0.141	39619363	39640756	-	6	17093	TTS	FUNDC2P4	50320	Intergenic	0.017039	0.558241		Gain	Unchanged	Unchanged	Unchanged
DENND2A	chr7	140338562	140341120	ENSG00000146966	2559	*	4.41	6.09	4.81	5.25	3.36	9	33.47	64.82	71.17	15.94	40.26	36.77	39.41	8.82	11.65	1.68	0.002	0.0516	0.4	0.578	1	0.84	0.176	0.431	1.52	0.0124	0.03	140218219	140340576	-	19	735	TSS	RN7SL771P	5802	intron	0.072741	0.636044	NM_001318053, intron 1 of 13	Gain	Unchanged	Unchanged	Gain
GPSM1	chr9	139221134	139224498	ENSG00000160360	3365	*	5.37	6.83	6.19	6.58	4.49	20	62.67	114.48	112.5	56.6	89.2	109.46	81.45	23.24	21.85	1.46	0.00199	0.0516	0.82	0.12	0.364	1.21	0.0146	0.117	1.18	0.0166	0.0376	139221931	139254057	+	13	885	TSS	DKFZP434A062	3176	intron	0.050847	0.690547	NM_015597, intron 1 of 8	Gain	Unchanged	Unchanged	Gain
MIR3164	chr11	68843488	68855679	ENSG00000265539	12192	*	7.19	8.22	7.97	8.33	6.56	122	170.2	257.58	337.5	221.62	281.02	392.53	250.48	109.79	78.64	1.03	0.00202	0.0518	0.78	0.0248	0.184	1.14	0.0016	0.0336	1.02	0.00341	0.0104	68850643	68850726	+	0	1060	TSS	TPCN2	6408	intron	0.032568	0.5979	NM_139075, intron 18 of 24	Gain	Unchanged	Gain	Gain
RNU7-57P	chr1	154312411	154317191	ENSG00000238365	4781	*	4.67	6.07	5.55	6.03	5.05	26	24.92	53.87	80.36	36.67	56.84	79.53	50.8	38.47	27.67	1.4	0.00206	0.0528	0.88	0.0764	0.295	1.36	0.00348	0.0528	0.34	0.44	0.511	154311218	154311278	+	0	3523	TTS	ATP8B2	8982	intron	0.021971	0.551255	NM_001370597, intron 13 of 27	Gain	Unchanged	Gain	Unchanged
SLC4A11	chr20	3203074	3212201	ENSG00000088836	9128	*	6.92	7.98	8.11	8.13	5.76	111	131.75	198.65	306.12	218.43	333.12	303.59	254.86	59.3	48.79	1.06	0.00207	0.0528	1.18	0.000879	0.0431	1.2	0.00026	0.012	1.53	1.5e-05	0.000101	3208143	3219836	-	19	506	TTS	ITPA	3122	TTS	0.031229	0.594281	NM_001174089	Gain	Gain	Gain	Gain
CBFB	chr16	67060631	67064346	ENSG00000067955	3716	*	5.33	6.74	6.55	6.62	4.95	23	57.68	90.07	123.98	74.94	112.09	106.9	90.21	38.47	23.3	1.41	0.00207	0.0528	1.21	0.0114	0.131	1.29	0.00516	0.066	0.87	0.0568	0.1	67063049	67134961	+	5	560	TSS	RN7SL543P	8770	promoter-TSS	0.067582	0.579542	NM_022845	Gain	Unchanged	Gain	Unchanged
MIR3186	chr17	79403622	79424614	ENSG00000266189	20993	*	8.11	9.28	8.34	10.19	7.97	177	376.72	537.04	703.32	268.65	378.91	1315.28	1019.45	274.87	225.01	1.16	0.00208	0.053	0.23	0.579	0.765	2.08	1.66e-07	0.000101	0.58	0.0931	0.149	79418129	79418214	-	0	4011	TTS	RP11-1055B8.7	19239	exon	0.035825	0.648914	NM_001291324, exon 11 of 28	Gain	Unchanged	Gain	Unchanged
SRC	chr20	36006037	36014949	ENSG00000197122	8913	*	6.45	7.54	7.28	7.49	5.87	67	107.53	179.29	193.62	141.9	168.14	209.52	149.76	66.51	50.24	1.1	0.0021	0.0531	0.83	0.0281	0.193	1.04	0.00603	0.0722	1.07	0.0038	0.0114	35973087	36033817	+	13	23324	TTS	RPL7AP14	62641	intron	0.03131	0.550943	NM_198291, intron 2 of 13	Gain	Unchanged	Gain	Gain
CAMK2N2	chr3	183974849	183982344	ENSG00000163888	7496	*	7.05	8.18	7.75	8.59	5.72	89	175.19	265.15	313.78	160.23	271.55	369.44	402	68.12	37.14	1.13	0.00213	0.0538	0.71	0.0878	0.314	1.55	3.53e-05	0.00352	1.51	0.000295	0.00134	183977000	183979251	-	1	654	TSS	ECE2	11114	intron	0.052042	0.599466	NM_033259, intron 1 of 1	Gain	Unchanged	Gain	Gain
UBAP1	chr9	34177335	34179246	ENSG00000165006	1912	*	4.91	6.23	5.38	5.09	4.19	26	34.18	71.55	78.06	34.28	48.94	37.63	30.65	16.83	19.66	1.31	0.00214	0.0538	0.47	0.35	0.597	0.18	0.729	0.871	1.03	0.0355	0.069	34179002	34252521	+	7	712	TSS	AL353662.3	8356	promoter-TSS	0.036649	0.5191	NM_016525	Gain	Unchanged	Unchanged	Gain
MAPRE1	chr20	31406740	31409620	ENSG00000101367	2881	*	6.1	7.28	5.93	6.6	3.98	47	89.73	157.41	153.83	42.25	79.73	101.77	92.84	17.63	13.84	1.19	0.00214	0.0538	-0.16	0.709	0.846	0.51	0.223	0.483	2.33	5.28e-07	5.38e-06	31407698	31438211	+	6	482	TSS	DNMT3B	11018	intron	0.051059	0.553472	NM_012325, intron 1 of 6	Gain	Unchanged	Unchanged	Gain
RNU6-220P	chr8	144413158	144417848	ENSG00000212221	4691	*	6.45	7.54	6.89	6.38	6.08	68	106.82	175.09	196.68	102.04	135.77	101.77	64.81	77.73	57.53	1.09	0.00216	0.0542	0.44	0.258	0.517	-0.07	0.852	0.933	0.89	0.0146	0.0341	144432341	144432448	+	0	16838	TSS	TOP1MT	23974	intron	0.034975	0.611727	NM_001258447, intron 1 of 13	Gain	Unchanged	Unchanged	Unchanged
TBCCD1	chr3	186287915	186290516	ENSG00000113838	2602	*	5.38	6.68	5.38	5.58	4.39	28	55.55	108.59	97.19	35.87	47.36	53.02	42.92	21.64	20.39	1.3	0.00216	0.0542	-0.01	0.969	0.986	0.2	0.698	0.853	1.37	0.00286	0.00902	186263861	186288332	-	7	884	TSS	DNAJB11	4024	promoter-TSS	0.034615	0.495194	NM_001134415	Gain	Unchanged	Unchanged	Gain
AC100791.2	chr17	77782729	77793082	ENSG00000238331	10354	*	7.85	9.12	8.7	9.23	6.95	123	338.98	509.26	601.53	349.96	483.89	630.28	571.03	153.06	94.66	1.27	0.00217	0.0545	0.85	0.0527	0.25	1.38	0.00117	0.028	1.14	0.0783	0.129	77784477	77784573	+	0	3332	TTS	RP11-353N14.2	9344	Intergenic	0.058346	0.623201		Gain	Unchanged	Gain	Unchanged
XRCC6	chr22	42056792	42060967	ENSG00000196419	4176	*	6.3	7.37	7.26	7.35	4.32	74	83.32	190.24	140.05	148.28	157.88	167.62	157.65	21.64	18.2	1.07	0.0022	0.055	0.96	0.00616	0.105	1.05	0.00238	0.0423	2.32	1.87e-08	2.75e-07	42017122	42060043	+	12	1164	TTS	NHP2L1	12048	intron	0.008864	0.428982	NM_001288978, intron 11 of 11	Gain	Unchanged	Gain	Gain
NTMT1	chr9	132387661	132405953	ENSG00000148335	18293	*	9.11	10.15	10.02	10.5	7	413	689.35	1144.79	1134.18	896.83	1182.5	1421.33	1468.75	156.27	100.49	1.05	0.00221	0.0551	0.92	0.0147	0.149	1.39	0.000118	0.00743	2.27	4.87e-10	1.04e-08	132371162	132398209	+	4	1402	TTS	ASB6	2363	TTS	0.033131	0.565001	NM_177999	Gain	Unchanged	Gain	Gain
STX10 / IER2	chr19	13243489	13268831	ENSG00000104915	25343	*	9.3	10.41	9.78	9.52	6.83	453	809.7	1221.39	1499.23	833.05	920.42	825.26	647.23	125.82	101.94	1.11	0.00223	0.0554	0.47	0.207	0.464	0.22	0.551	0.763	2.6	4.11e-13	1.81e-11	13254871	13261160	-	7	1289	TTS	CTC-250I14.3	4199	exon	0.036344	0.568266	NM_003765, exon 5 of 8	Gain	Unchanged	Unchanged	Gain
SUPT5H	chr19	39962442	39967437	ENSG00000196235	4996	*	5.42	6.69	6	6.97	4.97	31	54.83	94.28	111.73	50.22	77.36	148.8	102.47	39.27	23.3	1.26	0.00223	0.0554	0.57	0.223	0.482	1.55	0.000225	0.011	0.9	0.0429	0.0803	39932282	39967310	+	30	2370	TTS	TIMM50	6112	exon	0.020224	0.57978	NM_001319991, exon 26 of 29	Gain	Unchanged	Gain	Unchanged
CTD-2555C10.3	chr14	103018355	103025161	ENSG00000259230	6807	*	5.89	7.25	6.98	7.19	4.91	31	87.59	133	172.19	118.78	134.2	176.17	116.48	34.46	25.49	1.36	0.00224	0.0555	1.09	0.0176	0.16	1.3	0.00498	0.0649	1.34	0.00327	0.0101	103011590	103022163	+	2	405	TTS	MIR4309	15695	non-coding	0.031447	0.567587	NR_146561, exon 3 of 3	Gain	Unchanged	Gain	Gain
DLGAP1-AS1	chr18	3594005	3603829	ENSG00000177337	9825	*	7.98	9.06	9.6	8.86	6.56	176	329.72	559.77	505.1	801.96	750.71	437.86	492.21	117.8	71.36	1.07	0.00225	0.0555	1.62	1.46e-05	0.0048	0.88	0.0164	0.124	1.72	4.9e-06	3.83e-05	3594111	3598350	+	2	567	TTS	DLGAP1-AS2	4818	intron	0.020666	0.468037	NM_001242761, intron 7 of 11	Gain	Gain	Unchanged	Gain
AC112198.1	chr5	53989493	53993591	ENSG00000232517	4099	*	5.16	6.48	5.87	5.71	4.27	31	40.59	111.11	67.35	60.59	56.05	52.17	52.55	24.04	14.56	1.32	0.00227	0.0556	0.7	0.113	0.355	0.55	0.225	0.486	1.43	0.00226	0.00742	54104037	54168379	-	9	112495	TTS	SNX18	149127	intron	0.008055	0.450708	NR_104658, intron 1 of 2	Gain	Unchanged	Unchanged	Gain
AC012360.6	chr2	105981268	105983932	ENSG00000238273	2665	*	5.5	6.75	6.46	6.27	3.84	35	55.55	127.11	88.78	74.14	101.83	88.08	66.56	18.43	10.19	1.25	0.00226	0.0556	0.96	0.0248	0.184	0.77	0.0724	0.275	1.97	6.5e-05	0.000365	105979494	105995296	+	3	3106	TSS	FHL2	5318	intron	0.013519	0.471096	NM_001450, intron 4 of 5	Gain	Unchanged	Unchanged	Gain
VAV2	chr9	136849652	136860440	ENSG00000160293	10789	*	7.21	8.4	8.26	7.66	6.42	93	203.67	285.36	388.78	263.87	351.28	217.22	186.55	93.76	77.91	1.18	0.00228	0.0556	1.05	0.00927	0.122	0.44	0.268	0.532	1.11	0.00327	0.0101	136627015	136857726	-	29	2680	TSS	LINC00094	39114	intron	0.045425	0.593066	NM_001134398, intron 1 of 29	Gain	Unchanged	Unchanged	Gain
RN7SL277P	chr1	19773984	19778848	ENSG00000240490	4865	*	4.93	6.41	5.85	6.34	4.18	16	44.86	74.92	95.66	49.43	66.31	90.65	71.82	20.84	15.29	1.49	0.00229	0.0557	0.93	0.0811	0.304	1.42	0.00425	0.0592	1.4	0.00425	0.0125	19750877	19751163	+	0	25253	TTS	CAPZB	35650	intron	0.013983	0.484375	NM_001206541, intron 1 of 8	Gain	Unchanged	Gain	Gain
RP11-336K24.12	chr1	155943636	155954024	ENSG00000273002	10389	*	7.72	8.83	7.61	7.64	6.13	138	283.43	457.91	450	157.84	233.66	207.81	190.93	79.34	60.44	1.11	0.0024	0.0557	-0.11	0.784	0.889	-0.08	0.825	0.92	1.83	1.43e-06	1.3e-05	155948589	155952777	+	1	241	TSS	ARHGEF2	23525	promoter-TSS	0.018773	0.544667	NM_001162383	Gain	Unchanged	Unchanged	Gain
RP11-374P20.4	chr9	136905133	136915104	ENSG00000235138	9972	*	7.08	8.17	7.98	8.25	6.21	104	166.64	229.8	348.21	220.82	284.18	349.77	260.99	74.53	73.55	1.09	0.00239	0.0557	0.9	0.0136	0.143	1.17	0.0011	0.0273	1.23	0.000438	0.00187	136919411	136923927	+	2	9292	TSS	BRD3	14692	intron	0.02999	0.582289	NM_007371, intron 7 of 11	Gain	Unchanged	Gain	Gain
RP11-755B10.4	chr3	57582069	57584607	ENSG00000272146	2539	*	4.97	6.28	4.8	4.62	4	28	34.89	88.38	66.58	31.89	23.68	27.37	21.9	16.03	16.02	1.3	0.00239	0.0557	-0.18	0.724	0.854	-0.35	0.502	0.731	1.39	0.00426	0.0125	57583441	57586647	+	2	103	TSS	ARF4	203	promoter-TSS	0.054001	0.534673	NR_132369	Gain	Unchanged	Unchanged	Gain
MN1	chr22	28154728	28157178	ENSG00000169184	2451	*	4.8	6.29	5.65	5.5	5.04	15	40.59	70.71	85.71	49.43	51.31	52.17	38.54	36.86	29.13	1.49	0.00237	0.0557	0.86	0.112	0.352	0.71	0.205	0.465	0.41	0.351	0.425	28144264	28197486	-	2	11689	TTS	RP11-375H17.1	38288	intron	0.014292	0.52449	NM_002430, intron 1 of 1	Gain	Unchanged	Unchanged	Unchanged
AC005329.7	chr19	1382933	1410363	ENSG00000248015	27431	*	8.52	9.68	9.88	10.02	7.33	242	493.51	673.4	967.35	724.64	1154.08	1148.52	929.24	183.52	138.35	1.16	0.00236	0.0557	1.35	0.00105	0.0464	1.5	0.000111	0.00721	1.4	0.000127	0.000651	1392168	1396466	-	2	182	TSS	GAMT	442	TTS	0.048708	0.604484	NM_000156	Gain	Gain	Gain	Gain
CC2D1A	chr19	14036589	14046191	ENSG00000132024	9603	*	7.74	8.82	8.73	8.46	5.52	150	277.02	401.52	499.74	375.47	475.21	383.13	322.3	55.3	36.41	1.08	0.00241	0.0557	0.99	0.00812	0.117	0.72	0.049	0.223	2.37	1.47e-09	2.81e-08	14017013	14041692	+	28	302	TTS	PODNL1	894	TTS	0.027601	0.583628	NM_024825	Gain	Unchanged	Unchanged	Gain
ARIH2OS	chr3	48960972	48965914	ENSG00000221883	4943	*	5.51	6.8	6.41	5.95	4.76	29	61.96	108.59	114.03	80.52	89.99	76.97	46.42	28.85	25.49	1.29	0.00232	0.0557	0.91	0.0442	0.232	0.44	0.374	0.629	1.3	0.00246	0.00797	48955220	48956818	-	0	6625	TSS	ARIH2	7190	intron	0.017405	0.452044	NM_001317333, intron 3 of 16	Gain	Unchanged	Unchanged	Gain
CTA-714B7.5	chr22	35620302	35626163	ENSG00000233080	5862	*	6.65	7.68	6.68	6.83	5.87	89	111.81	228.96	179.85	113.2	92.36	120.58	107.73	59.3	57.53	1.03	0.00232	0.0557	0.03	0.934	0.968	0.19	0.609	0.8	1.25	0.000394	0.00171	35515816	35627049	-	5	3816	TSS	RNU7-167P	22532	intron	0.010239	0.489507	NR_126356, intron 1 of 5	Gain	Unchanged	Unchanged	Gain
PALM	chr19	729947	742988	ENSG00000099864	13042	*	7.43	8.52	8.83	8.95	5.97	122	222.19	319.87	412.5	378.66	532.84	593.5	394.99	65.71	59.71	1.09	0.00232	0.0557	1.41	0.000226	0.0215	1.52	6.34e-05	0.00495	1.63	1.17e-05	8.15e-05	708952	748328	+	8	11860	TTS	MISP	14658	intron	0.034433	0.59405	NM_001040134, intron 7 of 7	Gain	Gain	Gain	Gain
POLE	chr12	133255230	133266550	ENSG00000177084	11321	*	7.88	8.9	8.24	7.73	5.97	178	294.11	462.12	490.56	299.74	304.7	237.74	188.3	69.72	56.07	1.01	0.00238	0.0557	0.36	0.317	0.568	-0.15	0.672	0.839	2.11	4.11e-09	7.11e-08	133200347	133263945	-	48	3055	TSS	RP13-672B3.2	3744	intron	0.044704	0.545495	NM_006231, intron 1 of 48	Gain	Unchanged	Unchanged	Gain
ROGDI	chr16	4843645	4851198	ENSG00000067836	7554	*	6.86	7.92	8.09	8.25	6.4	90	141.72	214.65	268.62	244.73	299.18	333.52	275.01	91.36	77.91	1.06	0.00231	0.0557	1.23	0.000622	0.0367	1.39	7.89e-05	0.00581	0.79	0.0241	0.0508	4846968	4852951	-	10	454	TTS	RP11-127I20.5	888	TTS	0.028469	0.592745	NM_001253794	Gain	Gain	Gain	Unchanged
ARIH1	chr15	72765317	72767913	ENSG00000166233	2597	*	5.97	7.06	6.29	5.89	3.92	55	70.5	138.89	128.57	71.75	84.46	63.28	55.18	13.62	16.75	1.09	0.00233	0.0557	0.32	0.429	0.66	-0.08	0.827	0.921	2.19	1.65e-06	1.47e-05	72766666	72879692	+	13	51	TSS	RP11-1007O24.3	65	promoter-TSS	0.068208	0.584746	NR_135678	Gain	Unchanged	Unchanged	Gain
LRRC8A	chr9	131643555	131651693	ENSG00000136802	8139	*	6.75	7.84	6.58	5.94	5.59	78	137.44	228.12	228.83	89.28	102.62	67.56	55.18	53.69	42.96	1.08	0.00239	0.0557	-0.17	0.657	0.816	-0.81	0.044	0.21	1.51	6.9e-05	0.000384	131644390	131680318	+	3	3234	TSS	CCBL1	3309	intron	0.028389	0.550627	NM_001127244, intron 1 of 3	Gain	Unchanged	Unchanged	Gain
RP11-282O18.3	chr12	123737196	123741353	ENSG00000235423	4158	*	5.63	6.92	6.82	6.69	4.18	31	68.37	127.11	114.8	121.17	104.99	96.64	109.48	14.42	21.85	1.28	0.00237	0.0557	1.19	0.00656	0.106	1.05	0.0161	0.124	1.84	0.000108	0.000566	123736788	123746030	-	4	2486	TTS	C12orf65	3232	intron	0.01949	0.484484	NM_001194995, intron 2 of 2	Gain	Unchanged	Unchanged	Gain
FAM83D	chr20	37553622	37561887	ENSG00000101447	8266	*	7.33	8.44	8.2	8.21	5.61	108	213.64	328.28	365.05	261.48	327.6	327.54	266.25	51.29	46.6	1.11	0.0023	0.0557	0.87	0.0241	0.182	0.88	0.0203	0.14	1.96	2.87e-07	3.12e-06	37554954	37581703	+	3	2800	TSS	PPP1R16B	6088	intron	0.029163	0.519056	NM_030919, intron 1 of 3	Gain	Unchanged	Unchanged	Gain
MRPL23	chr11	1973131	1981682	ENSG00000214026	8552	*	7.24	8.24	8.21	8.25	5.16	121	180.88	283.67	322.19	229.59	360.75	320.7	289.9	42.47	29.13	1.01	0.00234	0.0557	0.97	0.00938	0.122	1.02	0.00289	0.0473	2.27	3.43e-09	6.03e-08	1968561	2005752	+	5	8846	TSS	TNNT3	17470	intron	0.039532	0.607648	NM_021134, intron 4 of 4	Gain	Unchanged	Gain	Gain
PPP5C	chr19	46853555	46858495	ENSG00000011485	4941	*	6.28	7.42	6.79	6.91	5.03	55	100.41	171.72	170.66	103.63	118.41	156.5	83.2	30.45	34.95	1.14	0.00239	0.0557	0.51	0.206	0.463	0.63	0.152	0.4	1.43	0.000571	0.00234	46850357	46896238	+	13	5668	TSS	HIF3A	9335	intron	0.022069	0.575709	NM_001204284, intron 1 of 11	Gain	Unchanged	Unchanged	Gain
RCN3	chr19	50044008	50049050	ENSG00000142552	5043	*	6.05	7.1	6.57	7.31	4.66	71	61.24	135.52	139.29	80.52	109.72	165.91	152.39	34.46	16.02	1.06	0.00237	0.0557	0.52	0.171	0.427	1.27	0.000299	0.0129	1.73	0.000107	0.00056	50031882	50050219	+	6	3690	TTS	NOSIP	13276	3' UTR	0.022218	0.53808	NM_020650, exon 7 of 7	Gain	Unchanged	Gain	Gain
RALY	chr20	32584631	32588782	ENSG00000125970	4152	*	5.82	7.11	5.49	5.28	4.62	33	79.76	139.73	136.22	50.22	39.47	49.6	28.03	21.64	27.67	1.29	0.00234	0.0557	-0.33	0.482	0.699	-0.54	0.284	0.547	1.6	0.000385	0.00167	32581451	32668077	+	9	5256	TSS	RP5-1125A11.1	5776	intron	0.00988	0.463744	NM_007367, intron 1 of 8	Gain	Unchanged	Unchanged	Gain
ANAPC11	chr17	79847923	79866370	ENSG00000141552	18448	*	8.96	10.18	10	9.97	7.65	302	694.33	988.22	1329.34	825.08	1223.55	968.08	1040.47	238.81	163.11	1.22	0.00234	0.0557	1.04	0.015	0.15	1.01	0.0122	0.106	1.56	5.23e-05	0.000303	79848665	79858131	+	4	984	TTS	NPB	1474	exon	0.038708	0.589689	NM_001289420, exon 4 of 5	Gain	Unchanged	Unchanged	Gain
ACTN1	chr14	69428550	69433774	ENSG00000072110	5225	*	6.02	7.1	5.65	6.63	6.24	56	73.35	130.47	144.64	48.63	52.1	97.49	100.72	88.95	62.62	1.09	0.00236	0.0557	-0.36	0.375	0.618	0.62	0.104	0.329	0.44	0.229	0.302	69340859	69446157	-	21	14995	TSS	ACTN1-AS1	15236	intron	0.01053	0.513974	NM_001130005, intron 1 of 20	Gain	Unchanged	Unchanged	Unchanged
KRT17	chr17	39779993	39782595	ENSG00000128422	2603	*	4.87	6.16	4.42	4.58	4.54	28	30.62	70.71	72.7	19.13	23.68	15.39	32.41	23.24	23.3	1.29	0.00241	0.0558	-0.45	0.408	0.645	-0.29	0.602	0.796	0.68	0.144	0.21	39775688	39780829	-	7	465	TSS	KRT42P	1284	promoter-TSS	0.024606	0.61837	NM_000422	Gain	Unchanged	Unchanged	Unchanged
RP3-467L1.4	chr1	7865975	7869127	ENSG00000236266	3153	*	4.65	6	6.14	6.4	3.47	23	27.06	64.82	63.52	65.37	75.78	88.94	79.7	11.22	10.92	1.36	0.00243	0.0561	1.5	0.000839	0.0424	1.75	4.6e-05	0.004	1.58	0.00386	0.0116	7870301	7887402	-	2	2750	TTS	PER3	22838	intron	0.009203	0.40736	NM_001289861, intron 10 of 22	Gain	Gain	Gain	Gain
ZNF256	chr19	58454559	58461122	ENSG00000152454	6564	*	6.72	7.94	7.03	7	5.4	65	145.28	198.65	291.58	146.68	114.46	135.98	119.99	37.66	46.6	1.22	0.00246	0.0563	0.31	0.468	0.688	0.28	0.504	0.732	1.54	0.00021	0.001	58452200	58459039	-	2	1198	TSS	CTD-2583A14.1	6684	intron	0.02865	0.512418	NM_005773, intron 1 of 2	Gain	Unchanged	Unchanged	Gain
RBFOX2	chr22	36422727	36425463	ENSG00000100320	2737	*	6.36	7.49	6.67	6.81	4.55	59	105.4	187.71	170.66	90.88	112.09	130.84	93.71	28.05	18.93	1.12	0.00246	0.0563	0.3	0.462	0.683	0.45	0.272	0.535	2.07	1.59e-06	1.42e-05	36140251	36424473	-	13	378	TSS	APOL3	112276	intron	0.063254	0.589912	NM_001082578, intron 1 of 13	Gain	Unchanged	Unchanged	Gain
PLEKHO2	chr15	65151848	65161738	ENSG00000241839	9891	*	6.7	7.84	7.48	8.46	6.53	70	137.44	200.34	259.44	145.88	211.56	408.78	296.03	97.77	86.65	1.15	0.00247	0.0565	0.78	0.0538	0.252	1.76	4.97e-06	0.000983	0.62	0.0823	0.135	65134087	65160206	+	5	3413	TTS	AC069368.3	22647	intron	0.01355	0.549039	NM_001195059, intron 4 of 4	Gain	Unchanged	Gain	Unchanged
RP11-265D17.2	chr11	12240201	12246733	ENSG00000254680	6533	*	6.4	7.49	7.26	7.38	5.13	64	104.68	180.14	178.32	150.67	155.51	186.43	147.14	41.67	28.4	1.09	0.00248	0.0567	0.86	0.0226	0.177	0.98	0.00912	0.0904	1.72	1.51e-05	0.000102	12282972	12284720	-	1	39505	TTS	MICAL2	40999	intron	0.014852	0.513778	NR_144420, intron 10 of 27	Gain	Unchanged	Unchanged	Gain
WFIKKN1	chr16	666680	688948	ENSG00000127578	22269	*	8.62	9.67	9.63	10.03	7.47	298	486.39	674.25	957.4	638.54	941.74	1133.98	962.52	212.37	143.45	1.06	0.00254	0.0576	1.01	0.00714	0.11	1.42	6.26e-05	0.00491	1.36	0.000112	0.000583	679238	684116	+	1	1424	TSS	RAB40C	1457	3' UTR	0.045044	0.627807	NM_001172663, exon 7 of 7	Gain	Unchanged	Gain	Gain
PQLC1	chr18	77674450	77685524	ENSG00000122490	11075	*	6.8	7.86	7.75	8.51	5.99	88	134.59	198.65	265.56	184.95	244.71	409.64	319.67	72.12	54.61	1.06	0.00253	0.0576	0.95	0.00962	0.123	1.71	1.12e-06	0.000371	1.13	0.00203	0.00681	77662419	77711664	-	5	17568	TTS	KCNG2	20171	intron	0.035853	0.585516	NM_001146345, intron 3 of 4	Gain	Unchanged	Gain	Gain
TOR1B	chr9	132570351	132576679	ENSG00000136816	6329	*	5.84	7.06	6.77	7.25	5.29	38	76.91	138.05	129.34	102.04	116.83	162.49	141.88	42.47	35.68	1.22	0.00254	0.0576	0.93	0.0287	0.194	1.41	0.000547	0.0187	1.05	0.00935	0.0238	132565431	132573560	+	4	45	TTS	TOR1A	1707	TTS	0.019599	0.480563	NM_014506	Gain	Unchanged	Gain	Gain
DANCR	chr4	53577994	53584838	ENSG00000226950	6845	*	8.94	9.97	10.1	9.62	5.64	367	613.86	1059.77	945.92	1073.01	1125.67	779.08	789.99	60.9	38.59	1.03	0.00253	0.0576	1.16	0.00146	0.0527	0.68	0.0541	0.235	3.41	1.38e-19	2.83e-17	53578990	53586518	+	3	2426	TSS	MIR4449	2502	intron	0.024112	0.465809	NR_145129, intron 4 of 4	Gain	Gain	Unchanged	Gain
FAM207A	chr21	46366168	46380909	ENSG00000160256	14742	*	7.15	8.18	7.98	8.65	7.02	112	172.34	255.89	322.96	237.56	268.39	478.05	326.68	148.25	111.41	1.03	0.00257	0.0581	0.83	0.0185	0.163	1.5	3.17e-05	0.00333	0.46	0.181	0.252	46359924	46396904	+	5	13614	TSS	C21orf67	13710	intron	0.035821	0.597042	NM_001316983, intron 2 of 5	Gain	Unchanged	Gain	Unchanged
L47234.1	chr19	45838012	45846066	ENSG00000268341	8055	*	5.06	6.42	7.21	6.96	5.72	21	45.58	88.38	82.65	142.7	153.93	147.09	102.47	48.88	56.8	1.36	0.00261	0.0582	2.16	4.57e-07	0.000544	1.91	1.87e-05	0.00239	0.09	0.817	0.849	45842444	45842639	+	0	405	TSS	KLC3	5348	Intergenic	0.030051	0.523094		Gain	Gain	Gain	Unchanged
AC068014.2	chr17	80737013	80744064	ENSG00000265461	7052	*	6.3	7.44	7.16	7.33	5.63	61	96.14	136.36	211.99	94.86	191.03	183.87	137.5	55.3	43.69	1.15	0.00261	0.0582	0.86	0.044	0.231	1.03	0.00652	0.0753	1.07	0.00481	0.0139	80736352	80736450	-	0	4088	TSS	TBCD	30600	intron	0.035745	0.577081	NM_005993, intron 7 of 38	Gain	Unchanged	Gain	Gain
SCN5A	chr3	38666215	38671028	ENSG00000183873	4814	*	4.84	6.35	6.43	6.84	5.1	14	43.44	86.7	76.53	86.1	86.83	112.03	117.36	39.27	29.13	1.51	0.00259	0.0582	1.59	0.00153	0.0536	2	2.97e-05	0.00321	0.64	0.142	0.207	38589552	38691164	-	27	22542	TSS	SCN10A	69670	intron	0.013092	0.51818	NM_198056, intron 3 of 27	Gain	Gain	Gain	Unchanged
FURIN	chr15	91414161	91418183	ENSG00000140564	4023	*	6.47	7.59	6.78	6.47	5.22	62	115.37	182.66	203.57	94.07	125.51	104.33	73.57	48.08	26.21	1.12	0.00259	0.0582	0.31	0.461	0.682	0	0.993	0.997	1.46	0.000706	0.0028	91411821	91426688	+	15	4351	TSS	FES	11469	promoter-TSS	0.049988	0.612631	NM_001289824	Gain	Unchanged	Unchanged	Gain
TARS	chr5	33439471	33442482	ENSG00000113407	3012	*	7.04	8.05	7.33	6.81	4.25	107	155.96	295.46	235.71	128.35	193.4	127.42	97.22	25.64	12.38	1.01	0.0026	0.0582	0.29	0.442	0.669	-0.23	0.527	0.748	2.99	3.88e-12	1.39e-10	33440881	33469644	+	19	96	TSS	CTD-2203K17.1	252	promoter-TSS	0.034551	0.4819	NM_001258438	Gain	Unchanged	Unchanged	Gain
SERTAD2	chr2	64862471	64866491	ENSG00000179833	4021	*	5.77	6.96	6.15	6.96	4.94	39	70.5	128.79	120.92	65.37	76.57	135.98	112.98	32.06	29.13	1.19	0.00262	0.0583	0.37	0.399	0.637	1.18	0.00344	0.0526	1.27	0.00226	0.00743	64863666	64978139	-	1	815	TTS	AC007365.3	7264	intron	0.016173	0.437313	NM_014755, intron 1 of 1	Gain	Unchanged	Gain	Gain
ASS1	chr9	133345226	133358243	ENSG00000130707	13018	*	7.6	8.76	7.98	8.2	6.52	116	272.75	437.71	431.63	210.46	295.23	358.33	230.34	103.38	80.1	1.16	0.00263	0.0583	0.38	0.368	0.613	0.6	0.155	0.404	1.4	0.000227	0.00107	133320315	133376661	+	15	24926	TTS	HMCN2	56766	intron	0.026429	0.583391	NM_054012, intron 8 of 14	Gain	Unchanged	Unchanged	Gain
MIR199B	chr9	130983736	130990806	ENSG00000207581	7071	*	6.13	7.28	6.99	7.77	5.38	52	88.3	133	178.32	114.79	139.72	264.25	171.66	45.68	37.87	1.15	0.00266	0.0584	0.86	0.0301	0.198	1.64	2.98e-05	0.00321	1.22	0.00169	0.00585	131006999	131007109	-	0	19728	TTS	DNM1	21614	intron	0.021078	0.541443	NM_001005336, intron 10 of 22	Gain	Unchanged	Gain	Gain
AL022341.3	chr16	690861	701263	ENSG00000228201	10403	*	8.42	9.47	9.52	9.66	6.51	245	439.39	633	789.8	610.64	857.27	874.86	744.44	109.79	72.82	1.06	0.00265	0.0584	1.1	0.00391	0.0849	1.24	0.000632	0.0205	2.06	2.62e-08	3.72e-07	698472	699200	-	1	2410	TTS	FAM195A	2412	intron	0.050572	0.650356	NR_138611, intron 1 of 3	Gain	Gain	Gain	Gain
SNORD89	chr2	101890588	101893197	ENSG00000212283	2610	*	4.7	6.12	5.93	6.19	3.82	20	32.05	54.71	84.18	60.59	61.57	69.27	77.07	14.42	13.84	1.42	0.00264	0.0584	1.23	0.00914	0.121	1.49	0.00103	0.0263	1.42	0.00542	0.0153	101889397	101889511	-	0	2382	TSS	RNF149	4210	TTS	0.021856	0.436949	NM_173647	Gain	Unchanged	Gain	Gain
BCL11A	chr2	60776293	60779532	ENSG00000119866	3240	*	5.57	6.7	6.37	6.45	4.59	44	51.27	104.38	104.08	81.31	84.46	96.64	77.95	26.45	21.85	1.13	0.00266	0.0584	0.8	0.0445	0.233	0.87	0.0276	0.164	1.43	0.000792	0.00309	60678301	60780702	-	6	2790	TSS	AC009970.1	50814	intron	0.061767	0.598024	NM_022893, intron 1 of 3	Gain	Unchanged	Unchanged	Gain
CCND2	chr12	4402597	4407582	ENSG00000118971	4986	*	5.78	6.87	5.61	7.04	5.23	61	49.14	114.48	120.15	49.43	48.15	142.82	119.99	38.47	36.41	1.09	0.00265	0.0584	-0.17	0.687	0.833	1.25	0.000664	0.0209	1.17	0.0029	0.00913	4382937	4414516	+	4	9426	TTS	CCND2-AS1	19740	intron	0.020666	0.483852	NM_001759, intron 4 of 4	Gain	Unchanged	Gain	Gain
SNAPC4	chr9	139286946	139297090	ENSG00000165684	10145	*	7.16	8.21	8.13	8.5	6.23	104	182.31	281.99	310.71	233.57	328.38	398.52	327.56	94.56	56.07	1.05	0.00266	0.0585	0.97	0.0104	0.127	1.34	0.000212	0.0107	1.2	0.00189	0.00639	139270028	139293249	-	22	1231	TSS	SDCCAG3	4358	intron	0.034802	0.596116	NM_003086, intron 1 of 22	Gain	Unchanged	Gain	Gain
CCDC18	chr1	93644195	93646536	ENSG00000122483	2342	*	4.84	6.15	5.45	4.43	3.97	26	31.33	63.13	78.83	43.05	44.21	29.93	13.14	16.83	14.56	1.31	0.00267	0.0585	0.61	0.21	0.467	-0.41	0.483	0.716	1.37	0.00552	0.0155	93645475	93744034	+	29	110	TSS	TMED5	920	promoter-TSS	0.058974	0.525844	NM_001306076	Gain	Unchanged	Unchanged	Gain
NCS1	chr9	132972702	132979573	ENSG00000107130	6872	*	6.55	7.56	7.16	7.8	5.29	80	107.53	184.34	193.62	121.17	164.98	259.98	186.55	45.68	32.77	1.01	0.00269	0.0587	0.61	0.1	0.334	1.25	0.000452	0.0165	1.58	3.71e-05	0.000224	132934856	132999583	+	7	23446	TTS	AL360004.1	69640	intron	0.02329	0.569641	NM_014286, intron 2 of 7	Gain	Unchanged	Gain	Gain
TOMM70A	chr3	100118411	100121897	ENSG00000154174	3487	*	7.16	8.22	8.03	7.84	4.66	101	185.16	306.4	291.58	242.34	278.65	248.01	211.07	26.45	24.03	1.06	0.0027	0.0589	0.86	0.0211	0.172	0.68	0.0677	0.265	2.69	3.98e-11	1.11e-09	100082274	100120242	-	11	88	TSS	LNP1	118	promoter-TSS	0.03759	0.485657	NM_014820	Gain	Unchanged	Unchanged	Gain
OXLD1	chr17	79630133	79637912	ENSG00000204237	7780	*	7.1	8.11	8.08	7.96	6.12	107	167.35	291.25	261.73	240.75	299.18	261.69	237.35	89.75	49.52	1.01	0.00272	0.0592	0.98	0.00646	0.105	0.86	0.0136	0.113	1.33	0.00054	0.00223	79632065	79633665	-	1	358	TSS	CCDC137	630	promoter-TSS	0.038185	0.569096	NR_130938	Gain	Unchanged	Unchanged	Gain
RP11-416N2.4	chr10	105429156	105433410	ENSG00000273108	4255	*	4.78	6.08	5.79	6.22	5.12	27	27.77	61.45	74.23	62.18	48.15	76.97	71.82	35.26	34.22	1.31	0.00273	0.0593	1.01	0.0294	0.197	1.44	0.000806	0.0233	0.39	0.359	0.434	105368375	105369807	+	0	61476	TTS	SH3PXD2A	77500	intron	0.012227	0.508933	NM_014631, intron 6 of 13	Gain	Unchanged	Gain	Unchanged
MIR4505	chr14	74224067	74229621	ENSG00000264741	5555	*	8.89	9.95	9.25	9.2	6.66	349	600.33	851.86	1128.83	550.06	665.45	672.18	507.1	118.6	83.01	1.06	0.00274	0.0594	0.36	0.332	0.581	0.31	0.391	0.644	2.35	8.91e-11	2.26e-09	74225449	74225522	+	0	1322	TTS	ELMSAN1	27117	5' UTR	0.044661	0.585164	NM_001367710, exon 1 of 13	Gain	Unchanged	Unchanged	Gain
TSKU	chr11	76507181	76510826	ENSG00000182704	3646	*	5.28	6.48	6.63	6.33	4.83	39	38.46	75.76	102.55	93.27	104.2	81.24	79.7	31.25	25.49	1.2	0.00274	0.0594	1.35	0.000634	0.0371	1.06	0.00883	0.0888	1.1	0.00934	0.0238	76494282	76509198	+	1	194	TTS	RP11-21L23.2	2404	3' UTR	0.030187	0.595062	NM_001258210, exon 2 of 2	Gain	Gain	Gain	Gain
DNAJC30	chr7	73089836	73104611	ENSG00000176410	14776	*	8.11	9.22	9.03	9.02	6.57	176	376.01	592.6	596.94	542.08	506.79	543.9	496.59	112.99	76.46	1.11	0.00279	0.0599	0.93	0.0179	0.161	0.91	0.0176	0.129	1.73	7.08e-06	5.27e-05	73095298	73097783	-	0	560	TSS	WBSCR22	712	promoter-TSS	0.028158	0.512014	NR_045512	Gain	Unchanged	Unchanged	Gain
MYO1G	chr7	45013619	45019049	ENSG00000136286	5431	*	6.11	7.25	6.09	7.1	5.72	51	87.59	136.36	168.37	43.84	92.36	149.66	125.24	56.1	49.52	1.14	0.00278	0.0599	-0.03	0.944	0.973	0.99	0.0113	0.102	0.95	0.0114	0.0278	45002264	45018697	-	21	2363	TSS	SNHG15	6287	intron	0.017314	0.593923	NM_033054, intron 2 of 21	Gain	Unchanged	Unchanged	Unchanged
EIF3L	chr22	38272019	38275879	ENSG00000100129	3861	*	5.3	6.52	6.24	6.61	4.57	32	47	94.28	88.78	71.75	78.94	100.06	95.46	24.84	22.57	1.21	0.0028	0.06	0.93	0.0292	0.196	1.31	0.00129	0.0298	1.28	0.00321	0.00993	38244874	38285414	+	12	11465	TTS	RNU6-900P	13404	exon	0.016066	0.46943	NM_001242923, exon 9 of 11	Gain	Unchanged	Gain	Gain
HSF1	chr8	145517396	145526063	ENSG00000185122	8668	*	8.14	9.15	8.58	8.72	6.51	207	356.78	576.6	559.44	338.8	424.69	475.49	368.72	94.56	87.38	1.01	0.00281	0.0601	0.44	0.233	0.492	0.58	0.107	0.335	1.93	1.75e-08	2.59e-07	145515279	145538385	+	12	6450	TSS	BOP1	6648	intron	0.025156	0.538825	NM_005526, intron 1 of 12	Gain	Unchanged	Unchanged	Gain
LL22NC03-63E9.3	chr22	22895010	22904501	ENSG00000220891	9492	*	8.03	9.04	9.2	9.49	6.32	192	329.72	529.46	520.41	535.71	637.03	759.41	679.63	84.14	75.73	1.01	0.00282	0.0602	1.17	0.00128	0.0497	1.46	3.56e-05	0.00352	1.96	1.66e-08	2.48e-07	22901749	22909007	+	2	1994	TSS	PRAME	2012	5' UTR	0.02118	0.517332	NM_206953, exon 2 of 5	Gain	Gain	Gain	Gain
MRC2	chr17	60763538	60771586	ENSG00000011028	8049	*	7.51	8.53	8.44	8.39	6.75	134	230.73	351.01	390.31	303.73	392.33	383.98	287.27	122.61	92.48	1.02	0.00284	0.0604	0.93	0.0114	0.131	0.88	0.0161	0.123	1.14	0.0011	0.00408	60704761	60770958	+	29	3396	TTS	RNU6-446P	6191	exon	0.023736	0.579523	NM_006039, exon 26 of 30	Gain	Unchanged	Unchanged	Gain
RP11-462L8.1	chr10	33245651	33248531	ENSG00000229656	2881	*	7.46	8.46	7.53	6.95	4.73	132	219.34	343.44	362.75	186.54	183.93	126.57	119.99	31.25	21.85	1.01	0.00286	0.0606	0.08	0.842	0.92	-0.51	0.156	0.405	2.89	4.91e-13	2.13e-11	33247772	33371030	+	3	681	TSS	ITGB1	28340	promoter-TSS	0.067732	0.570833	NM_002211	Gain	Unchanged	Unchanged	Gain
NOP58	chr2	203129112	203131022	ENSG00000055044	1911	*	5.92	7.06	5.78	5.33	3.22	45	76.2	138.89	128.57	42.25	67.89	41.05	39.41	12.82	5.83	1.14	0.00285	0.0606	-0.14	0.744	0.867	-0.59	0.179	0.435	2.86	4.79e-08	6.35e-07	203130438	203168389	+	14	371	TSS	SNORD70	11086	promoter-TSS	0.050288	0.53089	NM_015934	Gain	Unchanged	Unchanged	Gain
KIF2C	chr1	45206644	45209774	ENSG00000142945	3131	*	5.83	6.97	6.41	6.61	4.53	46	67.65	139.73	110.2	68.56	101.83	101.77	93.71	26.45	19.66	1.14	0.00285	0.0606	0.58	0.165	0.419	0.78	0.0468	0.217	1.53	0.000453	0.00193	45205491	45233439	+	20	2718	TSS	RNU5D-1	11367	intron	0.014382	0.471565	NM_001297655, intron 2 of 19	Gain	Unchanged	Unchanged	Gain
AC004549.6	chr7	27778988	27782489	ENSG00000229893	3502	*	5.89	6.95	5.41	5.54	4.32	57	61.24	117.85	129.34	33.48	51.31	67.56	25.4	22.44	17.48	1.06	0.00287	0.0607	-0.48	0.271	0.528	-0.35	0.476	0.711	1.92	7.42e-06	5.5e-05	27773013	27780014	-	1	724	TSS	TAX1BP1	1748	intron	0.042	0.500143	NM_001362794, intron 1 of 16	Gain	Unchanged	Unchanged	Gain
TXNDC9	chr2	99933008	99937555	ENSG00000115514	4548	*	5.55	6.74	6.63	7.19	4.74	39	54.83	125.42	88.78	68.56	129.46	145.38	146.26	26.45	26.94	1.19	0.00289	0.0611	1.08	0.0144	0.147	1.64	1.38e-05	0.00192	1.42	0.000597	0.00243	99938573	99957165	-	4	3292	TTS	C2orf15	3914	TTS	0.015178	0.41214	NM_005783	Gain	Unchanged	Gain	Gain
CHD7	chr8	61591403	61594700	ENSG00000171316	3298	*	4.97	6.39	5.02	6.26	4.68	18	44.86	74.07	93.37	20.73	44.21	83.81	69.19	25.64	25.49	1.41	0.0029	0.0612	0.05	0.959	0.98	1.28	0.00814	0.085	0.72	0.126	0.189	61591336	61779465	+	37	1716	TSS	RP11-91I20.1	15962	intron	0.084951	0.572035	NM_017780, intron 1 of 37	Gain	Unchanged	Gain	Unchanged
RALY	chr20	32581067	32583108	ENSG00000125970	2042	*	6.11	7.15	6.16	5.78	3.8	63	74.77	134.68	148.47	68.56	74.2	62.43	47.29	18.43	9.47	1.04	0.00292	0.0614	0.05	0.902	0.95	-0.33	0.413	0.66	2.41	2.78e-07	3.05e-06	32581451	32668077	+	9	636	TSS	RP5-1125A11.1	1158	promoter-TSS	0.073039	0.630083	NR_109885	Gain	Unchanged	Unchanged	Gain
RN7SL182P	chr3	49123164	49126947	ENSG00000241461	3784	*	5.94	7.12	7	6.43	4.29	44	79.05	156.57	120.92	150.67	104.99	85.52	86.71	20.84	18.2	1.17	0.00293	0.0615	1.05	0.011	0.13	0.49	0.247	0.51	2.08	1.94e-06	1.7e-05	49120665	49120963	+	0	4092	TTS	QRICH1	6740	intron	0.02036	0.452022	NM_001320584, intron 1 of 9	Gain	Unchanged	Unchanged	Gain
RP1-288L1.5	chr22	35078399	35081417	ENSG00000234891	3019	*	4.86	6.17	5.54	5.33	4.39	23	34.89	68.18	75.77	41.45	51.31	45.33	35.03	20.03	21.85	1.31	0.00295	0.0617	0.68	0.169	0.424	0.47	0.356	0.615	1.05	0.0241	0.0508	35099116	35100876	-	2	19208	TTS	RP1-288L1.4	27990	Intergenic	0.035466	0.540424		Gain	Unchanged	Unchanged	Gain
AC010761.13	chr17	27006219	27012411	ENSG00000265205	6193	*	5.99	7.06	6.72	7.03	5.29	55	71.93	127.11	139.29	99.65	111.3	162.49	98.97	48.88	29.13	1.07	0.00295	0.0617	0.73	0.0544	0.254	1.04	0.00841	0.0865	1.31	0.00114	0.00423	26997071	26999822	-	1	9493	TSS	SUPT6H	20207	intron	0.018898	0.494994	NM_001320755, intron 14 of 37	Gain	Unchanged	Gain	Gain
FAM118A	chr22	45721186	45725242	ENSG00000100376	4057	*	6.05	7.13	6.52	8.19	4.81	58	74.77	122.05	158.42	74.94	108.15	362.6	222.46	32.06	24.03	1.08	0.00295	0.0617	0.46	0.246	0.506	2.14	9.36e-09	1.14e-05	1.51	0.000235	0.0011	45704862	45737836	+	9	14622	TTS	SMC1B	16729	intron	0.020222	0.537475	NM_001349915, intron 3 of 7	Gain	Unchanged	Gain	Gain
RP11-429J17.2	chr8	144771922	144783952	ENSG00000181097	12031	*	7.53	8.54	8.65	8.97	7.26	146	223.61	314.82	430.1	336.41	468.9	566.99	434.41	178.71	127.43	1.01	0.00296	0.0618	1.12	0.00181	0.0585	1.44	3.61e-05	0.00354	0.71	0.0361	0.07	144778323	144780583	+	1	386	TSS	ZNF707	11284	TTS	0.037825	0.584871	NM_001288808	Gain	Gain	Gain	Unchanged
MIR4479	chr9	139786249	139795798	ENSG00000266507	9550	*	6.16	7.26	6.63	7.48	5.68	54	89.02	146.47	159.95	75.73	122.35	193.27	164.65	58.5	43.69	1.1	0.003	0.0623	0.47	0.269	0.525	1.32	0.000417	0.0159	0.95	0.013	0.031	139781184	139781255	+	0	9768	TTS	TRAF2	14640	intron	0.026498	0.54058	NM_021138, intron 1 of 10	Gain	Unchanged	Gain	Unchanged
SIK1	chr21	44845251	44848147	ENSG00000142178	2897	*	5.8	6.93	5.93	6.51	4.91	43	68.37	122.9	121.68	48.63	73.41	103.48	78.82	36.06	24.03	1.14	0.00299	0.0623	0.13	0.779	0.886	0.71	0.0846	0.296	1.12	0.00922	0.0235	44834394	44847008	-	13	309	TSS	LINC00319	19781	intron	0.102591	0.671271	NM_173354, intron 1 of 13	Gain	Unchanged	Unchanged	Gain
SCARF2	chr22	20789772	20797579	ENSG00000244486	7808	*	8.43	9.5	9.04	9.17	6.79	236	452.92	644.78	802.81	398.59	656.77	660.21	494.84	132.23	88.84	1.07	0.00301	0.0626	0.62	0.127	0.374	0.75	0.0488	0.223	1.83	9.74e-07	9.28e-06	20778873	20792112	-	10	1564	TSS	KLHL22	2130	Intergenic	0.037535	0.62239		Gain	Unchanged	Unchanged	Gain
MIR4641	chr6	41549063	41553492	ENSG00000266494	4430	*	5.53	6.69	5.99	6.39	4.85	40	52.7	90.07	117.09	61.38	65.52	100.91	66.56	32.06	25.49	1.16	0.00304	0.0627	0.45	0.286	0.542	0.85	0.042	0.205	1.12	0.00775	0.0205	41566460	41566526	+	0	15182	TSS	FOXP4	18844	intron	0.013098	0.557688	NM_001012426, intron 3 of 16	Gain	Unchanged	Unchanged	Gain
NR4A1	chr12	52430211	52436682	ENSG00000123358	6472	*	6.41	7.61	5.89	6.34	5.61	52	118.21	173.4	216.58	55.01	63.94	94.93	67.44	61.71	35.68	1.2	0.00303	0.0627	-0.52	0.239	0.499	-0.07	0.86	0.936	1.1	0.0106	0.0263	52416615	52452833	+	7	16832	TSS	RP11-1100L3.8	18796	intron	0.029985	0.577963	NM_001202234, intron 1 of 7	Gain	Unchanged	Unchanged	Gain
TMEM145	chr19	42816792	42821113	ENSG00000167619	4322	*	5.2	6.45	6.08	5.74	5.13	28	45.58	90.91	83.42	70.95	64.73	67.56	39.41	39.27	30.58	1.24	0.00307	0.0629	0.88	0.0481	0.241	0.54	0.27	0.533	0.39	0.365	0.44	42817487	42829214	+	14	1466	TSS	PRR19	3988	exon	0.034722	0.614441	NM_001366910, exon 5 of 15	Gain	Unchanged	Unchanged	Unchanged
AC006538.1	chr19	2725562	2730251	ENSG00000261342	4690	*	5.04	6.42	7.02	6.16	4.25	20	45.58	71.55	99.49	75.73	183.14	79.53	63.93	18.43	19.66	1.38	0.00307	0.0629	1.98	9.01e-05	0.0128	1.13	0.0187	0.134	1.26	0.0095	0.0241	2727740	2729325	-	0	166	TTS	AC006538.4	10140	Intergenic	0.033276	0.588185		Gain	Gain	Unchanged	Gain
SEC14L2	chr22	30815383	30824036	ENSG00000100003	8654	*	8.62	9.68	9.65	9.42	6.25	271	518.44	799.67	841.84	691.16	919.64	701.26	672.63	84.14	68.45	1.06	0.00306	0.0629	1.03	0.00804	0.116	0.8	0.0305	0.174	2.54	3.71e-12	1.34e-10	30792845	30821305	+	11	1596	TTS	MTFP1	1808	3' UTR	0.028548	0.516931	NM_012429, exon 12 of 12	Gain	Unchanged	Unchanged	Gain
CSNK1G1	chr15	64647338	64650114	ENSG00000169118	2777	*	6.58	7.62	7.87	7.44	4.18	74	117.5	191.08	202.81	189.73	279.44	193.27	153.27	13.62	22.57	1.04	0.00305	0.0629	1.29	0.000652	0.0375	0.86	0.021	0.143	2.59	3.81e-09	6.63e-08	64457715	64648386	-	12	340	TSS	CTD-2116N17.1	17242	promoter-TSS	0.043604	0.53134	NM_022048	Gain	Gain	Unchanged	Gain
RP11-650K20.2	chr12	104194339	104197709	ENSG00000257754	3371	*	4.85	6.2	6	5.52	2.96	20	37.74	70.71	76.53	72.54	55.26	40.19	51.67	10.42	5.1	1.35	0.0031	0.0631	1.15	0.0175	0.16	0.67	0.193	0.451	2.32	7.97e-05	0.000435	104213387	104215863	+	2	17363	TSS	NT5DC3	29937	intron	0.010389	0.467656	NM_001031701, intron 4 of 13	Gain	Unchanged	Unchanged	Gain
RP11-692D12.1	chr4	74122798	74128076	ENSG00000250220	5279	*	7.55	8.63	8.04	8.05	5.01	125	250.67	390.57	399.49	245.53	282.6	318.99	211.95	37.66	26.94	1.07	0.00308	0.0631	0.49	0.204	0.461	0.5	0.21	0.469	2.67	7.38e-11	1.91e-09	74124925	74183670	+	4	512	TSS	ANKRD17	935	promoter-TSS	0.035247	0.476127	NM_015574	Gain	Unchanged	Unchanged	Gain
AC005682.6	chr7	22908255	22912763	ENSG00000226329	4509	*	5.91	6.99	6.7	6.89	4.13	59	61.24	143.94	109.44	112.4	95.52	122.29	115.61	17.63	17.48	1.08	0.00311	0.0631	0.79	0.0353	0.213	0.98	0.00671	0.0764	2.23	2.18e-07	2.46e-06	22903492	22920969	-	9	7017	TTS	AC005682.7	11002	Intergenic	0.01065	0.446318		Gain	Unchanged	Unchanged	Gain
HELZ2	chr20	62185911	62207776	ENSG00000130589	21866	*	9.28	10.37	10.29	10.51	7.99	459	788.33	1093.44	1547.45	994.88	1502.2	1621.44	1285.7	302.12	205.35	1.08	0.00311	0.0631	1	0.0113	0.131	1.22	0.00107	0.0269	1.51	3.04e-05	0.000189	62190554	62203808	-	18	6290	TTS	C20orf195	8782	exon	0.048207	0.649348	NM_033405, exon 3 of 14	Gain	Unchanged	Gain	Gain
KIF1A	chr2	241653248	241655927	ENSG00000130294	2680	*	5.14	6.4	6.26	6.15	4.4	29	41.3	68.18	101.02	58.99	93.94	84.66	57.8	16.03	26.21	1.27	0.00319	0.064	1.12	0.0128	0.139	1.02	0.0222	0.147	1.15	0.015	0.0349	241653182	241759725	-	49	1406	TTS	AQP12A	16688	3' UTR	0.030246	0.614408	NM_001330289, exon 49 of 49	Gain	Unchanged	Unchanged	Gain
ARL5B	chr10	18947325	18950088	ENSG00000165997	2764	*	6.42	7.46	6.15	5.88	4.13	69	102.55	164.14	188.27	69.35	72.62	67.56	49.92	16.83	18.2	1.04	0.00319	0.064	-0.27	0.475	0.693	-0.55	0.173	0.427	2.43	1.88e-08	2.76e-07	18948333	18970568	+	5	374	TSS	ARL5B-AS1	510	promoter-TSS	0.047067	0.495114	NM_001351116	Gain	Unchanged	Unchanged	Gain
ASS1	chr9	133336433	133341181	ENSG00000130707	4749	*	5.11	6.36	5.14	6	5.09	34	34.89	63.97	100.26	36.67	33.94	80.39	47.29	36.06	32.04	1.25	0.00319	0.064	0.04	0.942	0.972	0.89	0.0496	0.224	0.7	0.0938	0.149	133320315	133376661	+	15	18492	TSS	HMCN2	43838	intron	0.026543	0.581297	NM_054012, intron 4 of 14	Gain	Unchanged	Unchanged	Unchanged
AURKAIP1	chr1	1305427	1311372	ENSG00000175756	5946	*	5.74	6.87	6.94	7.33	4.96	43	64.09	111.11	122.45	94.86	149.98	166.76	155.9	29.65	32.77	1.12	0.00317	0.064	1.19	0.00377	0.0833	1.59	2.01e-05	0.00248	1.18	0.00392	0.0117	1309109	1310875	-	3	710	TTS	RP5-890O3.3	5646	TTS	0.048789	0.622204	NM_001127230	Gain	Gain	Gain	Gain
CTB-25B13.13	chr19	1410567	1413685	ENSG00000267759	3119	*	4.87	6.16	5.14	5.61	4.06	27	31.33	83.33	59.69	23.92	46.57	45.33	52.55	15.23	18.2	1.29	0.00325	0.0644	0.27	0.611	0.786	0.75	0.111	0.34	1.22	0.0134	0.0318	1413899	1414734	+	1	1773	TSS	DAZAP1	4559	intron	0.033365	0.60712	NM_018959, intron 1 of 11	Gain	Unchanged	Unchanged	Gain
COL5A1-AS1	chr9	137596789	137606490	ENSG00000204011	9702	*	6.27	7.4	7.14	7.03	6.07	54	100.41	152.36	184.44	117.98	163.4	154.79	106.85	72.93	61.89	1.13	0.00325	0.0644	0.87	0.0339	0.209	0.76	0.0638	0.257	0.74	0.0441	0.0821	137541230	137544689	-	1	56950	TSS	COL5A1	68020	intron	0.021649	0.597567	NM_001278074, intron 4 of 65	Gain	Unchanged	Unchanged	Unchanged
C19orf54	chr19	41260071	41267742	ENSG00000188493	7672	*	7.08	8.28	8.06	7.67	5.33	75	195.84	313.97	306.12	247.92	284.97	218.07	188.3	44.88	35.68	1.2	0.00325	0.0644	0.98	0.0218	0.175	0.59	0.171	0.425	2.05	8.58e-07	8.28e-06	41247596	41257458	-	8	6448	TSS	SNRPA	7144	intron	0.016167	0.493677	NM_004596, intron 2 of 5	Gain	Unchanged	Unchanged	Gain
CCDC6	chr10	61664761	61668295	ENSG00000108091	3535	*	5.62	6.84	6.18	6.37	5	32	66.23	111.95	117.86	53.41	91.57	105.19	60.43	36.86	26.94	1.23	0.00327	0.0646	0.56	0.243	0.502	0.75	0.108	0.336	1.04	0.0163	0.0372	61548520	61666414	-	8	114	TSS	C10orf40	48659	promoter-TSS	0.043872	0.530843	NM_005436	Gain	Unchanged	Unchanged	Gain
SUMO1	chr2	203102199	203103852	ENSG00000116030	1654	*	5.34	6.5	5.79	5.67	3.52	46	34.89	84.18	96.43	56.6	53.68	70.13	31.53	12.82	10.19	1.16	0.0033	0.065	0.45	0.297	0.552	0.33	0.493	0.725	2.08	4.86e-05	0.000284	203070902	203103331	-	5	306	TSS	AC079354.2	1266	intron	0.050847	0.562008	NR_163943, intron 1 of 5	Gain	Unchanged	Unchanged	Gain
MRPL23-AS1	chr11	1985997	1998402	ENSG00000226416	12406	*	7.13	8.25	8.3	8.05	5.97	92	188.72	256.74	352.81	261.48	371.01	309.58	221.58	73.73	51.7	1.12	0.00334	0.0653	1.17	0.00334	0.0786	0.92	0.02	0.139	1.47	0.000159	0.000787	2004466	2011150	-	3	12266	TTS	MRPL23	13552	Intergenic	0.036682	0.644337		Gain	Gain	Unchanged	Gain
WDFY3-AS2	chr4	85885780	85889289	ENSG00000180769	3510	*	4.59	6.11	5.87	5.84	4.68	12	36.32	71.55	66.58	51.82	65.52	64.99	49.92	28.05	23.3	1.52	0.00334	0.0653	1.28	0.0186	0.164	1.25	0.0218	0.146	0.65	0.165	0.234	85887537	85932430	+	5	2	TSS	WDFY3	10	promoter-TSS	0.049316	0.518666	NR_015359	Gain	Unchanged	Unchanged	Unchanged
TSPYL1	chr6	116598621	116602468	ENSG00000189241	3848	*	5.54	6.8	6.28	6.53	3.53	29	64.09	113.64	108.67	78.12	77.36	97.49	87.58	14.42	8.74	1.26	0.00332	0.0653	0.74	0.107	0.346	0.99	0.026	0.159	2.33	6.58e-06	4.95e-05	116597740	116601066	-	0	522	TSS	RP1-93H18.1	816	promoter-TSS	0.034061	0.49961	NM_001080976	Gain	Unchanged	Unchanged	Gain
FAM91A1	chr8	124779386	124781825	ENSG00000176853	2440	*	6.39	7.57	6.41	6.21	5.06	52	116.08	173.4	205.87	79.72	89.99	88.08	59.56	38.47	28.4	1.17	0.00332	0.0653	0.01	0.993	0.997	-0.19	0.659	0.832	1.64	0.000114	0.000594	124780696	124827692	+	23	90	TSS	ANXA13	30958	promoter-TSS	0.048811	0.530955	NM_001317918	Gain	Unchanged	Unchanged	Gain
SERPINE1	chr7	100773483	100778363	ENSG00000106366	4881	*	6.21	7.4	6.52	6.42	4.68	45	102.55	158.25	179.08	87.69	95.52	92.36	78.82	27.25	24.03	1.19	0.00335	0.0653	0.31	0.488	0.704	0.21	0.641	0.821	1.78	5.45e-05	0.000314	100770369	100782547	+	9	5554	TSS	AP1S1	21840	intron	0.017832	0.511475	NM_000602, intron 4 of 8	Gain	Unchanged	Unchanged	Gain
RAP1B	chr12	69003685	69006359	ENSG00000127314	2675	*	5.17	6.37	5.46	5.04	3.85	33	39.17	75.76	89.54	50.22	37.89	36.77	28.9	12.82	16.02	1.2	0.00336	0.0654	0.29	0.543	0.74	-0.14	0.775	0.895	1.53	0.00229	0.0075	69004618	69054372	+	8	404	TSS	RP11-254B13.4	15627	intron	0.068088	0.544877	NM_001251917, intron 1 of 5	Gain	Unchanged	Unchanged	Gain
AD001527.7	chr19	36630281	36635452	ENSG00000270760	5172	*	6.94	7.98	7.92	7.32	4.75	88	157.38	260.94	244.13	216.83	266.81	176.17	143.63	30.45	23.3	1.04	0.00343	0.0655	0.98	0.00932	0.122	0.38	0.319	0.582	2.35	1.21e-08	1.88e-07	36634982	36639250	-	1	2116	TTS	CAPNS1	2390	intron	0.045068	0.575711	NM_001302633, intron 1 of 9	Gain	Unchanged	Unchanged	Gain
SLC38A7	chr16	58697735	58703336	ENSG00000103042	5602	*	5.64	6.76	6.58	6.62	4.94	43	56.97	98.49	118.62	84.5	106.57	100.06	97.22	35.26	26.21	1.12	0.00342	0.0655	0.93	0.0196	0.167	0.98	0.0118	0.104	1.17	0.00476	0.0138	58699012	58719008	-	11	1524	TTS	CNOT1	36746	non-coding	0.017857	0.517408	NR_161424, exon 12 of 12	Gain	Unchanged	Unchanged	Gain
ABCA2	chr9	139899219	139920898	ENSG00000107331	21680	*	7.29	8.32	8.33	8.92	7.29	124	189.43	258.42	378.83	233.57	411.27	551.6	416.01	188.32	123.79	1.02	0.00339	0.0655	1.04	0.00712	0.11	1.63	3.35e-06	0.000748	0.43	0.222	0.295	139901828	139923367	-	48	8230	TTS	C9orf139	11856	intron	0.044561	0.652521	NM_212533, intron 23 of 48	Gain	Unchanged	Gain	Unchanged
SEC61A2	chr10	12207092	12214360	ENSG00000065665	7269	*	6.12	7.14	7.24	7.46	4.79	69	70.5	129.63	152.3	143.49	159.46	182.16	169.91	25.64	29.86	1.02	0.00341	0.0655	1.12	0.00154	0.0538	1.34	0.000103	0.00684	1.95	6.83e-07	6.78e-06	12171692	12211960	+	13	1234	TTS	NUDT5	3403	intron	0.014311	0.417446	NR_024576, intron 12 of 12	Gain	Gain	Gain	Gain
CEP72	chr5	646625	653126	ENSG00000112877	6502	*	5.92	7.18	6.97	7.36	5.6	35	86.17	127.95	161.48	116.39	134.2	184.72	142.76	54.49	42.23	1.26	0.0034	0.0655	1.05	0.0179	0.161	1.43	0.000912	0.0248	0.91	0.0246	0.0516	612386	653668	+	11	3792	TTS	TPPP	11006	intron	0.022923	0.567605	NM_018140, intron 11 of 11	Gain	Unchanged	Gain	Unchanged
ARAP3	chr5	141031756	141037147	ENSG00000120318	5392	*	6.07	7.16	6.89	7.14	4.45	51	83.32	148.99	137.75	95.66	142.09	160.78	120.86	24.04	19.66	1.09	0.0034	0.0655	0.82	0.044	0.231	1.07	0.00621	0.0732	1.9	9.91e-06	7.06e-05	141032967	141061788	-	32	1484	TTS	FCHSD1	3466	intron	0.011132	0.51048	NM_022481, intron 32 of 32	Gain	Unchanged	Gain	Gain
SIRPA	chr20	1874278	1877405	ENSG00000198053	3128	*	5.72	6.89	6.6	6.29	4.64	38	67.65	107.74	130.1	74.14	119.99	80.39	76.2	28.05	21.85	1.17	0.00344	0.0655	0.88	0.0462	0.237	0.57	0.185	0.442	1.27	0.00468	0.0136	1875153	1920543	+	8	688	TSS	RP4-684O24.5	52050	promoter-TSS	0.072617	0.666134	NM_001040023	Gain	Unchanged	Unchanged	Gain
LRP3	chr19	33694245	33698787	ENSG00000130881	4543	*	5.23	6.51	6.9	7.28	5.51	26	49.14	78.28	104.08	109.21	129.46	181.3	129.62	56.9	34.22	1.28	0.00341	0.0655	1.67	8.5e-05	0.0127	2.05	9.13e-07	0.000321	0.36	0.393	0.467	33668508	33696197	+	6	319	TTS	CTD-2540B15.13	1518	exon	0.049328	0.656979	NM_002333, exon 5 of 7	Gain	Gain	Gain	Unchanged
CCDC102A	chr16	57544630	57551755	ENSG00000135736	7126	*	6.98	8.06	7.92	7.8	5.68	88	165.22	232.32	303.06	205.67	279.44	236.03	209.32	57.7	45.15	1.08	0.00341	0.0655	0.94	0.0158	0.153	0.81	0.0304	0.173	1.63	1.81e-05	0.000119	57546089	57570511	-	8	2104	TTS	DOK4	27786	intron	0.019231	0.537263	NM_033212, intron 8 of 8	Gain	Unchanged	Unchanged	Gain
SRP9	chr1	225978068	225980546	ENSG00000143742	2479	*	5.07	6.34	6.09	6.54	3.74	25	42.02	75.76	85.71	62.18	74.2	107.75	78.82	13.62	13.11	1.27	0.0034	0.0655	1.03	0.0244	0.183	1.48	0.000707	0.0217	1.74	0.00058	0.00237	225965530	225978168	+	3	1139	TTS	RP11-145A3.4	11542	Intergenic	0.019782	0.463277		Gain	Unchanged	Gain	Gain
OR7E47P	chr12	52472064	52476163	ENSG00000257542	4100	*	4.72	6.21	5.62	5.61	4.83	13	39.88	70.71	77.3	49.43	48.94	46.18	51.67	32.86	24.03	1.48	0.00351	0.0658	0.9	0.109	0.348	0.89	0.112	0.341	0.59	0.2	0.273	52473479	52502023	+	2	634	TSS	RP11-1100L3.7	1754	intron	0.031723	0.610149	NM_001369216, intron 1 of 2	Gain	Unchanged	Unchanged	Unchanged
FKRP	chr19	47240888	47254885	ENSG00000181027	13998	*	8.46	9.6	9.07	9.53	6.42	210	495.65	757.58	792.09	444.03	629.14	822.69	660.37	92.96	77.91	1.13	0.00349	0.0658	0.6	0.15	0.402	1.07	0.00844	0.0866	2.26	4.51e-09	7.72e-08	47249313	47280245	+	4	1426	TSS	STRN4	2252	intron	0.028937	0.542831	NM_001039877, intron 1 of 17	Gain	Unchanged	Gain	Gain
SAMM50	chr22	44340656	44344252	ENSG00000100347	3597	*	4.97	6.31	5.6	6.21	4.39	20	42.73	74.07	84.95	45.44	51.31	88.08	59.56	20.03	21.85	1.34	0.00349	0.0658	0.63	0.224	0.483	1.23	0.0104	0.0971	1.19	0.0107	0.0266	44351300	44392413	+	14	8846	TSS	PNPLA3	17914	3' UTR	0.01975	0.53198	NM_025225, exon 9 of 9	Gain	Unchanged	Gain	Gain
CDC42EP4	chr17	71280336	71285415	ENSG00000179604	5080	*	7.39	8.43	8.63	8.98	5.86	128	207.94	279.46	408.67	385.04	405.74	599.49	408.13	68.12	48.06	1.03	0.00351	0.0658	1.24	0.000457	0.031	1.58	1.43e-05	0.00193	1.73	3.47e-06	2.83e-05	71279762	71308314	-	2	3114	TTS	CPSF4L	24856	intron	0.028358	0.573932	NM_012121, intron 1 of 1	Gain	Gain	Gain	Gain
MTCH1	chr6	36952770	36956313	ENSG00000137409	3544	*	6.91	8	6.93	7.01	4.59	80	160.94	266.84	244.9	105.23	138.93	156.5	100.72	24.84	23.3	1.09	0.0035	0.0658	0.02	0.976	0.989	0.09	0.832	0.923	2.54	1.43e-09	2.74e-08	36935916	36954074	-	11	468	TSS	FGD2	18880	promoter-TSS	0.044043	0.539938	NM_001271641	Gain	Unchanged	Unchanged	Gain
TCF3	chr19	1643699	1649735	ENSG00000071564	6037	*	6.08	7.27	6.86	7.2	4.83	43	91.87	132.16	176.79	104.43	127.88	183.01	111.23	33.66	23.3	1.2	0.00353	0.0659	0.78	0.0671	0.278	1.13	0.00963	0.0929	1.55	0.000383	0.00166	1609292	1652604	-	18	5887	TSS	RNU6-1223P	30123	intron	0.038442	0.615474	NM_001136139, intron 2 of 19	Gain	Unchanged	Gain	Gain
LAMC3	chr9	133886070	133890916	ENSG00000050555	4847	*	5.87	7.01	5.99	6.27	5.14	43	74.06	117.85	139.29	53.41	73.41	96.64	57.8	36.06	34.22	1.14	0.00357	0.0665	0.12	0.808	0.902	0.4	0.372	0.628	1.07	0.00879	0.0227	133884468	133968446	+	27	4025	TSS	RP11-83J21.3	67586	intron	0.023323	0.575939	NM_006059, intron 1 of 27	Gain	Unchanged	Unchanged	Gain
NFATC1	chr18	77159011	77162624	ENSG00000131196	3614	*	5.34	6.7	6.52	6.99	4.99	21	59.82	95.12	112.5	66.96	116.04	124	129.62	44.08	19.66	1.36	0.0036	0.0665	1.18	0.0199	0.169	1.65	0.000328	0.0137	0.55	0.483	0.551	77155855	77289325	+	9	4962	TSS	ATP9B	22534	intron	0.074197	0.659009	NM_001278673, intron 1 of 8	Gain	Unchanged	Gain	Unchanged
KCTD15	chr19	34301080	34305354	ENSG00000153885	4275	*	5.68	6.81	6.09	6.31	4.89	41	61.24	99.33	125.51	67.76	68.68	84.66	73.57	29.65	29.86	1.14	0.00358	0.0665	0.42	0.328	0.577	0.63	0.127	0.365	1.18	0.00452	0.0132	34287766	34306668	+	7	3451	TTS	CHST8	38804	3' UTR	0.032296	0.580721	NM_024076, exon 7 of 7	Gain	Unchanged	Unchanged	Gain
SNHG1	chr11	62619788	62624269	ENSG00000255717	4482	*	6.14	7.23	7.43	6.83	4.68	79	61.96	186.03	114.8	229.59	115.25	70.98	156.77	28.85	22.57	1.09	0.00359	0.0665	1.29	0.00159	0.0545	0.69	0.106	0.332	1.77	1.81e-05	0.000119	62619460	62623357	-	10	1328	TSS	SLC3A2	1488	promoter-TSS	0.022545	0.445883	NR_002561	Gain	Gain	Unchanged	Gain
PLEKHG2	chr19	39903046	39909166	ENSG00000090924	6121	*	7.15	8.28	7.75	8.08	5.77	86	198.69	302.19	319.9	180.16	251.02	314.71	226.84	63.31	45.87	1.13	0.00361	0.0666	0.6	0.154	0.407	0.93	0.0241	0.153	1.58	0.000117	0.000605	39903749	39919054	+	19	2357	TSS	MIR4530	5788	intron	0.041673	0.617484	NM_022835, intron 4 of 18	Gain	Unchanged	Unchanged	Gain
DDX41	chr5	176934566	176942499	ENSG00000183258	7934	*	6.95	7.99	7.43	7.97	5.62	88	159.52	255.05	253.32	142.7	202.08	273.66	229.46	56.9	41.51	1.04	0.00362	0.0667	0.48	0.226	0.485	1.02	0.00585	0.0709	1.6	3.55e-05	0.000216	176938577	176944470	-	16	44	TTS	DOK3	1146	TTS	0.02761	0.601538	NM_001321732	Gain	Unchanged	Gain	Gain
MAFF	chr22	38596288	38603275	ENSG00000185022	6988	*	8.82	9.85	8.24	8.53	5.91	322	583.95	856.07	989.54	267.06	337.86	416.48	322.3	77.73	42.23	1.03	0.00363	0.0668	-0.58	0.117	0.359	-0.29	0.42	0.667	2.98	8.17e-14	4.23e-12	38597888	38612518	+	2	1894	TSS	TMEM184B	15516	intron	0.035643	0.574209	NM_001161573, intron 1 of 2	Gain	Unchanged	Unchanged	Gain
PAPPA	chr9	118916123	118920367	ENSG00000182752	4245	*	5.44	6.64	6.11	5.87	4.45	31	55.55	92.59	107.14	65.37	72.62	64.14	52.55	23.24	20.39	1.21	0.00365	0.0669	0.67	0.133	0.382	0.43	0.353	0.613	1.21	0.00899	0.0231	118916082	119164601	+	21	2163	TSS	AL353141.1	43023	intron	0.043601	0.533695	NM_002581, intron 1 of 21	Gain	Unchanged	Unchanged	Gain
RCAN1	chr21	35889369	35897815	ENSG00000159200	8447	*	6.28	7.37	7.27	6.98	5.59	56	99.7	157.41	173.72	129.14	179.19	141.96	111.23	44.88	51.7	1.09	0.00365	0.0669	0.99	0.0138	0.144	0.7	0.0785	0.287	1.04	0.00713	0.0191	35888781	35987441	-	4	4811	TTS	KCNE1	9979	3' UTR	0.019775	0.494672	NM_001331016, exon 3 of 3	Gain	Unchanged	Unchanged	Gain
POLR2H	chr3	184086429	184089469	ENSG00000163882	3041	*	4.78	6.13	5.29	5.71	4.17	23	32.05	86.7	53.57	34.28	44.21	55.59	49.05	20.03	16.02	1.35	0.00364	0.0669	0.51	0.318	0.569	0.93	0.0509	0.227	1.22	0.0112	0.0275	184079505	184086382	+	5	1567	TTS	EIF2B5	234786	Intergenic	0.012504	0.467434		Gain	Unchanged	Unchanged	Gain
POLR2H	chr3	184074634	184084405	ENSG00000163882	9772	*	8.12	9.2	8.93	9.14	6.23	176	380.28	579.97	596.94	470.34	504.42	565.28	560.52	93.76	56.07	1.08	0.00369	0.0671	0.81	0.0396	0.223	1.02	0.00841	0.0865	2.02	6.01e-07	6.04e-06	184079505	184086382	+	5	14	TSS	CLCN2	80	promoter-TSS	0.036029	0.581619	NM_001171088	Gain	Unchanged	Gain	Gain
ACTN4	chr19	39149731	39158372	ENSG00000130402	8642	*	6.4	7.44	7.3	7.5	5.77	69	100.41	154.04	192.09	156.25	157.88	202.68	159.4	57.7	51.7	1.03	0.00371	0.0673	0.89	0.0145	0.147	1.1	0.00258	0.0443	1.04	0.00472	0.0137	39138309	39222223	+	20	15742	TSS	CTB-186G2.4	20460	intron	0.019907	0.50596	NM_001322033, intron 1 of 20	Gain	Unchanged	Gain	Gain
SSFA2	chr2	182756023	182757757	ENSG00000138434	1735	*	5.15	6.37	5.47	5.45	3.32	37	34.18	98.49	66.58	25.51	63.15	45.33	42.04	11.22	8.74	1.21	0.00373	0.0676	0.32	0.54	0.738	0.3	0.515	0.74	2.13	5.73e-05	0.000328	182756614	182795465	+	17	276	TSS	RP11-366L5.1	500	non-coding	0.085401	0.625721	NR_109843, exon 1 of 18	Gain	Unchanged	Unchanged	Gain
RP11-438D8.2	chr3	141120260	141123811	ENSG00000249417	3552	*	5.35	6.64	6.69	5.99	4.62	26	55.55	83.33	115.56	106.82	99.46	59.86	67.44	27.25	21.85	1.29	0.00374	0.0677	1.34	0.00237	0.0662	0.64	0.176	0.431	1.22	0.00666	0.0181	140986194	141085979	-	2	36056	TSS	ZBTB38	39646	intron	0.041972	0.515348	NM_001350100, intron 1 of 3	Gain	Gain	Unchanged	Gain
NTHL1	chr16	2086575	2094133	ENSG00000065057	7559	*	5.9	7.11	7.27	7.84	6.17	45	74.77	99.33	176.02	123.56	184.72	267.67	191.8	84.14	59.71	1.2	0.00375	0.0677	1.36	0.000739	0.0393	1.94	3.9e-07	0.000169	0.29	0.43	0.503	2089815	2097867	-	6	539	TTS	SLC9A3R2	1327	intron	0.034538	0.638132	NM_001318193, intron 3 of 4	Gain	Gain	Gain	Unchanged
RP11-25B7.1	chr1	201623349	201628036	ENSG00000236390	4688	*	4.88	6.29	5.18	5.66	4.98	16	42.73	83.33	72.7	44.64	27.63	51.31	49.92	36.86	26.21	1.41	0.0038	0.0679	0.3	0.623	0.795	0.79	0.141	0.385	0.47	0.297	0.372	201642232	201643272	-	1	16540	TTS	NAV1	33092	intron	0.009603	0.517175	NM_020443, intron 1 of 29	Gain	Unchanged	Unchanged	Unchanged
KMT2B	chr19	36204713	36215154	ENSG00000272333	10442	*	8.54	9.72	9.45	9.69	6.18	205	538.37	781.99	906.89	545.27	854.91	890.25	756.71	76.13	68.45	1.18	0.00377	0.0679	0.91	0.0398	0.223	1.15	0.00662	0.0758	2.48	4.67e-05	0.000274	36208920	36229779	+	36	1014	TSS	ZBTB32	1994	intron	0.047893	0.623887	NM_014727, intron 1 of 36	Gain	Unchanged	Gain	Gain
C2CD4C	chr19	402053	407012	ENSG00000183186	4960	*	6.05	7.23	7.42	7.62	4.34	55	77.62	102.69	196.68	158.64	184.72	242.02	150.64	22.44	18.2	1.17	0.00378	0.0679	1.37	0.000187	0.0195	1.57	4.69e-05	0.00406	1.92	8.61e-06	6.25e-05	405437	409139	-	1	904	TTS	AC010641.1	5592	TTS	0.040137	0.644485	NM_001136263	Gain	Gain	Gain	Gain
GLI2	chr2	121486425	121489385	ENSG00000074047	2961	*	4.77	6.06	5.5	5	4.35	24	30.62	74.07	59.69	56.6	33.94	31.64	32.41	24.04	16.75	1.29	0.0038	0.0679	0.73	0.151	0.404	0.23	0.667	0.836	1.13	0.016	0.0366	121493198	121709339	+	13	5293	TSS	AC018866.1	19864	Intergenic	0.01149	0.450676		Gain	Unchanged	Unchanged	Gain
AFMID	chr17	76196323	76202301	ENSG00000183077	5979	*	5.45	6.6	6.58	7.04	5.8	43	44.15	77.44	117.09	86.1	105.78	167.62	95.46	60.9	50.24	1.16	0.00378	0.0679	1.14	0.00396	0.0851	1.59	9.35e-05	0.00638	0.42	0.267	0.342	76183397	76203782	+	10	4470	TTS	RP11-219G17.6	8386	intron	0.023089	0.531281	NM_001010982, intron 4 of 10	Gain	Gain	Gain	Unchanged
FOXK1	chr7	4746615	4752186	ENSG00000164916	5572	*	5.86	6.98	6.41	7.75	6.12	43	73.35	122.05	130.87	74.94	94.73	258.27	173.41	76.93	62.62	1.12	0.00379	0.0679	0.54	0.2	0.456	1.89	1.45e-06	0.000438	0.45	0.216	0.29	4683387	4802171	+	11	52770	TTS	AP5Z1	65882	intron	0.033573	0.524861	NM_001037165, intron 1 of 8	Gain	Unchanged	Gain	Unchanged
YTHDF1	chr20	61833250	61838711	ENSG00000149658	5462	*	5.94	7.02	6.85	7.32	6.06	49	74.06	127.95	131.63	113.2	117.62	177.02	142.76	69.72	63.35	1.08	0.0038	0.0679	0.91	0.0193	0.166	1.38	0.000253	0.0118	0.54	0.132	0.195	61826780	61847586	-	4	9200	TTS	RP5-963E22.4	23726	intron	0.027656	0.538912	NM_017798, intron 3 of 4	Gain	Unchanged	Gain	Unchanged
PELI2	chr14	56584494	56586718	ENSG00000139946	2225	*	4.78	6.04	5.32	5.62	4.58	30	24.92	68.18	63.52	43.84	36.31	53.02	45.54	30.45	17.48	1.26	0.00381	0.068	0.55	0.264	0.521	0.84	0.0711	0.272	0.67	0.171	0.24	56585092	56768244	+	5	514	TSS	AL163952.2	43322	intron	0.106163	0.672662	NM_021255, intron 1 of 5	Gain	Unchanged	Unchanged	Unchanged
ARRDC2	chr19	18108313	18115868	ENSG00000105643	7556	*	6.07	7.22	6.71	7.29	5.11	44	90.44	150.67	147.7	90.88	118.41	170.18	142.76	37.66	31.31	1.15	0.00382	0.068	0.64	0.139	0.39	1.22	0.00271	0.0457	1.24	0.00319	0.00989	18111940	18124911	+	7	150	TSS	KCNN1	1202	5' UTR	0.0417	0.581469	NM_001025604, exon 1 of 8	Gain	Unchanged	Gain	Gain
PTGER1	chr19	14575949	14595398	ENSG00000160951	19450	*	8.37	9.38	9.41	10.05	6.59	236	424.43	597.65	734.69	562.81	795.7	1225.49	896.84	99.37	93.93	1.01	0.00387	0.0682	1.04	0.0064	0.105	1.68	7.45e-06	0.00125	1.97	1.91e-08	2.8e-07	14583277	14586174	-	2	500	TSS	GIPC1	2898	intron	0.035736	0.592627	NM_000955, intron 1 of 2	Gain	Unchanged	Gain	Gain
CTD-2529O21.1	chr17	77977460	77984608	ENSG00000262172	7149	*	6.08	7.25	7.23	7.52	6.3	45	90.44	127.11	178.32	131.53	168.93	218.07	148.89	85.75	71.36	1.17	0.00385	0.0682	1.15	0.0053	0.0978	1.44	0.000462	0.0168	0.45	0.221	0.295	77965742	77966640	-	1	14394	TSS	TBC1D16	28613	intron	0.03428	0.582121	NM_019020, intron 3 of 11	Gain	Gain	Gain	Unchanged
MIR5703	chr2	228336635	228338247	ENSG00000266382	1613	*	4.73	6.02	5.35	5.9	3.65	23	29.91	59.76	70.41	28.7	52.89	82.1	37.66	12.02	13.11	1.3	0.00384	0.0682	0.62	0.238	0.497	1.18	0.0205	0.141	1.42	0.0077	0.0204	228336847	228336903	+	0	538	TTS	AGFG1	564	TTS	0.089385	0.653846	NR_049888	Gain	Unchanged	Unchanged	Gain
BAIAP2	chr17	79007615	79013082	ENSG00000175866	5468	*	6.57	7.66	7.41	7.52	6	67	122.49	171.72	231.89	157.04	183.14	201.83	164.65	72.93	55.34	1.09	0.00386	0.0682	0.84	0.0295	0.197	0.95	0.0131	0.11	0.83	0.0313	0.0625	79008961	79091232	+	15	1388	TSS	BAIAP2-AS1	1976	intron	0.059641	0.633986	NM_001144888, intron 1 of 13	Gain	Unchanged	Unchanged	Unchanged
CKAP5	chr11	46761567	46765945	ENSG00000175216	4379	*	5.85	6.93	7.31	6.61	4.86	48	67.65	131.31	113.27	196.11	122.35	88.08	107.73	31.25	26.94	1.08	0.00386	0.0682	1.46	0.00024	0.0223	0.76	0.0535	0.233	1.49	0.000238	0.00112	46764597	46867780	-	43	841	TTS	F2	2700	TTS	0.013023	0.466423	NM_001008938	Gain	Gain	Unchanged	Gain
CUL4A	chr13	113882430	113888722	ENSG00000139842	6293	*	5.94	6.96	6.48	7.06	5.27	61	61.96	123.74	125.51	92.47	86.04	142.82	123.49	37.66	39.32	1.02	0.00386	0.0682	0.54	0.155	0.408	1.11	0.00195	0.0374	1.25	0.00109	0.00405	113863085	113919391	+	19	22491	TSS	PCID2	22551	intron	0.022095	0.486173	NM_001008895, intron 5 of 19	Gain	Unchanged	Gain	Gain
PPP1R9B	chr17	48225123	48228978	ENSG00000108819	3856	*	6.88	7.98	7.7	8.08	5.41	78	157.38	214.65	291.58	164.22	251.81	316.42	223.33	48.08	37.14	1.1	0.00388	0.0684	0.82	0.0452	0.234	1.2	0.00241	0.0426	1.65	4.65e-05	0.000273	48211104	48227991	-	11	940	TSS	AC002401.1	3510	exon	0.07343	0.668482	NM_032595, exon 3 of 12	Gain	Unchanged	Gain	Gain
CCDC57	chr17	80162996	80167143	ENSG00000176155	4148	*	5.88	6.98	6.86	7.14	4.82	45	72.64	128.79	123.21	121.17	110.51	154.79	127.87	28.85	27.67	1.1	0.00392	0.0689	0.98	0.0135	0.142	1.26	0.00108	0.027	1.45	0.000472	0.00199	80059345	80170689	-	17	5620	TSS	RP13-516M14.2	7032	intron	0.023396	0.512177	NM_001367828, intron 1 of 16	Gain	Unchanged	Gain	Gain
ABCA3	chr16	2387697	2392216	ENSG00000167972	4520	*	4.87	6.11	5.68	6.72	5.57	27	31.33	64.82	73.47	43.05	59.2	108.61	101.59	58.5	36.41	1.25	0.00394	0.0691	0.81	0.0868	0.312	1.85	4.94e-06	0.000983	0.07	0.857	0.883	2325881	2390747	-	32	790	TSS	ABCA17P	966	promoter-TSS	0.072156	0.63576	NR_003574	Gain	Unchanged	Gain	Unchanged
SLC8A2	chr19	47921201	47936111	ENSG00000118160	14911	*	7.39	8.49	8.4	8.69	6.74	107	228.6	309.77	409.44	316.48	357.59	551.6	276.76	117.8	95.39	1.1	0.00396	0.0692	1.01	0.0104	0.127	1.3	0.00245	0.043	1.09	0.00243	0.00789	47931273	47975425	-	9	2617	TTS	MEIS3	5876	Intergenic	0.032732	0.576794		Gain	Unchanged	Gain	Gain
ARHGAP8	chr22	45095936	45101311	ENSG00000241484	5376	*	6.79	7.94	7.58	7.93	5.62	67	153.82	208.76	283.16	171.39	209.98	277.08	209.32	53.69	44.42	1.16	0.00397	0.0693	0.79	0.0581	0.261	1.14	0.00544	0.068	1.48	0.000234	0.0011	45098381	45258664	+	16	242	TSS	PRR5-ARHGAP8	512	intron	0.04131	0.588093	NM_181333, intron 1 of 7	Gain	Unchanged	Gain	Gain
SLC5A6	chr2	27422412	27431909	ENSG00000138074	9498	*	6.87	7.97	7.6	7.47	6.26	74	160.23	248.32	254.08	194.51	192.61	205.25	148.89	86.55	66.26	1.1	0.00399	0.0696	0.72	0.072	0.287	0.6	0.148	0.394	1.12	0.00256	0.00823	27422454	27435154	-	17	4706	TTS	ATRAID	7734	intron	0.014848	0.53301	NR_028323, intron 9 of 16	Gain	Unchanged	Unchanged	Gain
MIR455	chr9	116972243	116976548	ENSG00000207726	4306	*	5.27	6.42	5.85	5.99	3.67	36	41.3	87.54	83.42	62.98	52.1	61.57	65.69	15.23	10.19	1.15	0.004	0.0697	0.57	0.189	0.446	0.72	0.0898	0.305	1.85	0.000241	0.00112	116971713	116971809	+	0	2586	TTS	COL27A1	56556	intron	0.015102	0.524971	NM_032888, intron 12 of 60	Gain	Unchanged	Unchanged	Gain
AP006477.1	chr11	964195	967876	ENSG00000264671	3682	*	4.89	6.2	5.07	6.39	3.85	20	39.17	72.39	75	31.09	36.31	79.53	88.46	12.82	16.02	1.32	0.00407	0.07	0.19	0.746	0.868	1.51	0.000888	0.0246	1.23	0.0217	0.0468	951294	951364	-	0	14672	TSS	AP2A2	40156	intron	0.021739	0.494431	NR_144509, intron 2 of 20	Gain	Unchanged	Gain	Gain
RNU6-233P	chr17	37722954	37726275	ENSG00000222777	3322	*	5.57	6.67	6.21	6.03	3.86	43	51.99	110.27	93.37	88.49	59.2	82.95	48.17	15.23	13.84	1.1	0.00403	0.07	0.64	0.133	0.382	0.47	0.291	0.553	2.18	1.99e-06	1.73e-05	37702356	37702497	-	0	22118	TSS	CDK12	33216	Intergenic	0.006627	0.512797		Gain	Unchanged	Unchanged	Gain
RP11-413M3.4	chr9	139420402	139431386	ENSG00000227512	10985	*	5.66	6.93	6.26	8.15	6.56	37	64.09	80.81	163.01	58.99	94.73	336.95	232.09	115.4	72.82	1.27	0.00406	0.07	0.6	0.181	0.438	2.49	1.26e-10	5.89e-07	-0.24	0.547	0.611	139437332	139438287	+	1	11438	TSS	NOTCH1	14420	intron	0.037057	0.653769	NM_017617, intron 2 of 33	Gain	Unchanged	Gain	Unchanged
RP11-780K2.1	chr12	114373543	114380669	ENSG00000257359	7127	*	6.05	7.14	6.69	7.23	5.19	49	83.32	151.52	130.87	77.33	128.67	173.6	126.99	40.07	32.77	1.09	0.00406	0.07	0.64	0.137	0.388	1.18	0.00267	0.0453	1.34	0.000698	0.00278	114370373	114375060	+	1	2046	TTS	RBM19	27005	intron	0.014596	0.496913	NM_001146698, intron 15 of 24	Gain	Unchanged	Gain	Gain
ANAPC2	chr9	140067807	140080823	ENSG00000176248	13017	*	7.33	8.38	8.18	8.3	6.53	108	213.64	303.87	363.52	235.97	342.59	345.5	284.64	106.58	78.64	1.05	0.00406	0.07	0.85	0.0328	0.207	0.97	0.0106	0.0982	1.07	0.00405	0.0121	140069235	140082989	-	12	5080	TTS	TMEM210	7454	intron	0.038494	0.624385	NM_013366, intron 10 of 12	Gain	Unchanged	Unchanged	Gain
RP11-47I22.4	chr14	62121472	62123879	ENSG00000258989	2408	*	4.85	6.28	6.08	5.53	4.61	15	42.73	85.86	69.64	66.17	69.47	56.44	35.91	24.84	24.03	1.43	0.00404	0.07	1.23	0.0162	0.155	0.68	0.232	0.494	0.85	0.0693	0.117	61995845	62124682	+	3	2006	TTS	RP11-47I22.3	2738	Intergenic	0.009559	0.421271		Gain	Unchanged	Unchanged	Unchanged
PTPRF	chr1	44022252	44025397	ENSG00000142949	3146	*	5.88	6.98	6.18	7.17	4.88	49	69.08	105.22	147.7	55.8	89.2	171.89	115.61	30.45	28.4	1.1	0.00407	0.07	0.3	0.495	0.707	1.28	0.000978	0.0257	1.34	0.00108	0.00403	43996546	44089337	+	33	27278	TSS	KDM4A	92004	intron	0.023855	0.581558	NM_002840, intron 5 of 33	Gain	Unchanged	Gain	Gain
RAB35	chr12	120552345	120556112	ENSG00000111737	3768	*	6.8	7.82	7.86	7.54	4.92	82	141	223.91	227.3	208.06	256.55	194.13	177.79	32.06	28.4	1.02	0.00408	0.07	1.06	0.00456	0.0901	0.74	0.046	0.215	1.98	1.14e-06	1.06e-05	120532898	120554643	-	6	414	TSS	GCN1L1	10778	intron	0.054169	0.56172	NM_001167606, intron 1 of 4	Gain	Gain	Unchanged	Gain
TGFBI	chr5	135405035	135409548	ENSG00000120708	4514	*	5.41	6.62	6.04	5.98	4.24	35	49.85	122.9	74.23	62.98	68.68	70.13	56.05	22.44	15.29	1.22	0.00407	0.07	0.63	0.142	0.394	0.57	0.19	0.447	1.66	0.000255	0.00118	135364583	135399506	+	16	7786	TTS	VTRNA2-1	8868	Intergenic	0.0082	0.442943		Gain	Unchanged	Unchanged	Gain
CENPP	chr9	95398025	95405601	ENSG00000188312	7577	*	5.74	6.84	6.72	7.28	5.82	42	64.8	117	112.5	106.82	104.2	181.3	130.5	71.32	41.51	1.1	0.00409	0.0701	0.98	0.0136	0.143	1.55	7.47e-05	0.00565	0.56	0.157	0.225	95087765	95382815	+	7	18998	TTS	IPPK	26348	intron	0.017162	0.532339	NM_022755, intron 8 of 12	Gain	Unchanged	Gain	Unchanged
KIF26A	chr14	104638479	104646091	ENSG00000066735	7613	*	6.64	7.73	7.72	7.67	5.29	69	130.32	180.14	244.13	155.45	266.81	252.28	155.9	44.88	33.5	1.09	0.00411	0.0702	1.08	0.00893	0.121	1.03	0.0106	0.0982	1.51	0.000236	0.00111	104605376	104647231	+	14	4946	TTS	CTD-2223O18.1	38050	exon	0.054264	0.685365	NM_015656, exon 12 of 15	Gain	Unchanged	Gain	Gain
FHL2	chr2	105973644	105975853	ENSG00000115641	2210	*	5.13	6.3	6.74	5.86	3.57	35	34.89	85.86	71.94	114	100.25	46.18	70.07	12.02	11.65	1.17	0.00411	0.0702	1.62	4.57e-05	0.00865	0.73	0.103	0.327	2.01	6.26e-05	0.000354	105977282	106054960	-	7	2534	TTS	AC012360.6	4746	3' UTR	0.007699	0.40833	NM_001318897, exon 5 of 5	Gain	Gain	Unchanged	Gain
WDR37	chr10	1101955	1104815	ENSG00000047056	2861	*	4.88	6.14	5.84	5.67	3.26	24	34.89	65.66	75.77	49.43	65.52	57.3	44.67	10.42	8.74	1.26	0.00413	0.0704	0.96	0.0406	0.224	0.79	0.0987	0.319	1.82	0.00127	0.00461	1095477	1178237	+	13	7908	TSS	IDI1	8275	promoter-TSS	0.051766	0.531469	NR_134300	Gain	Unchanged	Unchanged	Gain
TRMT112	chr11	64078323	64087700	ENSG00000173113	9378	*	7.33	8.38	8.34	8.45	6.06	112	209.37	283.67	380.36	262.27	387.59	365.17	332.81	79.34	53.88	1.05	0.00414	0.0704	1.02	0.00919	0.121	1.12	0.00231	0.0417	1.58	2.94e-05	0.000183	64084162	64085556	-	3	1150	TTS	ESRRA	1198	TTS	0.03477	0.581103	NM_001286082	Gain	Unchanged	Gain	Gain
ADRBK1	chr11	67039510	67060248	ENSG00000173020	20739	*	8.85	10.03	10.01	10.38	7.54	263	659.44	890.58	1198.47	829.87	1230.65	1521.39	1135.06	229.19	141.99	1.18	0.00416	0.0706	1.16	0.00839	0.118	1.53	0.000371	0.0148	1.5	0.0158	0.0362	67033880	67054027	+	20	4148	TTS	ANKRD13D	6138	intron	0.033274	0.618044	NM_001619, intron 12 of 20	Gain	Unchanged	Gain	Gain
FIS1	chr7	100889582	100894096	ENSG00000214253	4515	*	4.83	6.16	5.79	5.73	4.47	19	37.74	70.71	71.94	51.82	59.2	64.14	42.04	15.23	29.13	1.33	0.00419	0.0708	0.97	0.0511	0.247	0.9	0.0776	0.285	1.21	0.0116	0.0283	100882874	100895597	-	4	3758	TSS	CLDN15	9738	Intergenic	0.022158	0.481391		Gain	Unchanged	Unchanged	Gain
PDPK2	chr16	2658732	2669286	ENSG00000205918	10555	*	5.96	7.05	6.8	7.46	4.83	48	76.91	120.37	144.64	99.65	123.93	224.92	126.12	32.86	24.03	1.09	0.0043	0.0712	0.84	0.0356	0.214	1.49	0.00028	0.0125	1.45	0.000555	0.00229	2666121	2693297	-	8	2112	TTS	AC141586.5	10659	non-coding	0.035819	0.580159	NR_015441, exon 3 of 4	Gain	Unchanged	Gain	Gain
KCNK5	chr6	39152668	39159956	ENSG00000164626	7289	*	6.67	7.73	7.37	7.76	5.79	70	133.17	195.29	230.36	133.93	196.56	251.43	181.29	60.1	50.24	1.07	0.00421	0.0712	0.7	0.0843	0.309	1.09	0.00527	0.0668	1.12	0.00402	0.012	39156748	39197226	-	4	436	TTS	SAYSD1	73347	TTS	0.017703	0.548985	NM_003740	Gain	Unchanged	Gain	Gain
BRD3	chr9	136927090	136934480	ENSG00000169925	7391	*	6.63	7.72	7.59	7.48	5.77	65	133.17	209.6	211.22	165.02	219.45	198.4	158.52	65.71	43.69	1.09	0.00428	0.0712	0.96	0.0182	0.163	0.85	0.0337	0.183	1.29	0.00107	0.00398	136895426	136933139	-	11	2354	TSS	RP11-374P20.4	6858	intron	0.06036	0.617321	NM_007371, intron 1 of 11	Gain	Unchanged	Unchanged	Gain
SLC7A6	chr16	68304559	68309022	ENSG00000103064	4464	*	5.13	6.46	5.57	5.84	4.74	21	49.14	101.01	75	44.64	50.52	78.68	35.91	28.85	24.76	1.33	0.00429	0.0712	0.44	0.402	0.64	0.71	0.191	0.449	0.83	0.0688	0.117	68298432	68335722	+	11	8358	TSS	RNU6-1262P	11334	intron	0.009637	0.495407	NM_003983, intron 2 of 10	Gain	Unchanged	Unchanged	Unchanged
TAF5L	chr1	229759622	229762612	ENSG00000135801	2991	*	5.91	7.01	6.32	6.34	4.44	46	74.06	143.94	114.03	65.37	94.73	92.36	70.07	30.45	13.11	1.1	0.00422	0.0712	0.42	0.334	0.583	0.44	0.299	0.56	1.59	0.000967	0.00367	229728867	229761794	-	4	677	TSS	URB2	863	promoter-TSS	0.066243	0.580602	NM_001314021	Gain	Unchanged	Unchanged	Gain
MCM10	chr10	13242159	13246752	ENSG00000065328	4594	*	5.39	6.5	6.23	5.75	4.44	41	42.73	95.96	84.95	74.14	75.78	54.73	52.55	22.44	21.12	1.11	0.00429	0.0712	0.84	0.0389	0.221	0.36	0.404	0.655	1.59	0.000218	0.00103	13203553	13253104	+	19	8648	TTS	RNU6-6P	14812	intron	0.015244	0.483562	NM_018518, intron 17 of 19	Gain	Unchanged	Unchanged	Gain
MRPS5	chr2	95753577	95756813	ENSG00000144029	3237	*	5.17	6.32	6	6.31	4.3	37	34.89	83.33	76.53	53.41	74.2	79.53	78.82	17.63	21.85	1.15	0.00428	0.0712	0.83	0.0579	0.26	1.14	0.00522	0.0665	1.28	0.00606	0.0167	95752951	95787745	-	11	2244	TTS	MAL	35458	intron	0.016692	0.451483	NR_136152, intron 10 of 10	Gain	Unchanged	Gain	Gain
PLOD1	chr1	12010187	12021873	ENSG00000083444	11687	*	6.86	7.87	7.64	8.04	6.24	95	136.73	188.55	278.57	181.76	217.08	288.2	236.47	72.12	78.64	1.01	0.00423	0.0712	0.78	0.0274	0.191	1.18	0.000662	0.0209	1.02	0.0032	0.0099	11994809	12035594	+	19	19564	TTS	MFN2	24207	intron	0.021309	0.533887	NM_001316320, intron 7 of 19	Gain	Unchanged	Gain	Gain
MAPK9	chr5	179717692	179720232	ENSG00000050748	2541	*	4.92	6.26	6.19	6.08	4.11	20	40.59	63.97	88.78	48.63	97.09	70.98	63.93	20.03	14.56	1.33	0.00431	0.0713	1.27	0.0129	0.139	1.15	0.0148	0.118	1.03	0.0452	0.0838	179660142	179719099	-	11	137	TSS	CTB-129O4.1	1282	promoter-TSS	0.086254	0.660236	NM_001364612	Gain	Unchanged	Unchanged	Gain
LCA10	chrX	153144335	153152467	ENSG00000196987	8133	*	6.65	7.71	7.17	7.1	5.38	68	132.46	201.18	218.88	140.3	147.62	153.08	121.74	41.67	41.51	1.07	0.00433	0.0714	0.52	0.191	0.446	0.46	0.259	0.522	1.58	6.28e-05	0.000354	153146126	153154444	+	6	2275	TSS	L1CAM	10726	intron	0.034682	0.631087	NR_130768, intron 1 of 6	Gain	Unchanged	Unchanged	Gain
EFCAB4B	chr12	3861336	3864350	ENSG00000130038	3015	*	5.06	6.44	5.02	5.43	4.96	17	49.85	89.23	84.95	28.7	36.31	49.6	36.78	34.46	27.67	1.38	0.00433	0.0714	-0.04	0.917	0.959	0.37	0.519	0.743	0.65	0.153	0.22	3724493	3862268	-	19	575	TSS	RNU6-174P	27350	promoter-TSS	0.032858	0.539482	NM_032680	Gain	Unchanged	Unchanged	Unchanged
DHX32	chr10	127525120	127529795	ENSG00000089876	4676	*	4.86	6.12	6.35	6.41	4.4	26	32.05	79.13	59.69	88.49	74.99	86.37	83.2	23.24	18.93	1.26	0.00436	0.0714	1.49	0.000508	0.0327	1.55	0.000241	0.0115	1.39	0.0018	0.00614	127524908	127569884	-	10	2550	TTS	BCCIP	14806	intron	0.01027	0.445989	NM_018180, intron 9 of 10	Gain	Gain	Gain	Gain
TNRC6B	chr22	40740718	40743595	ENSG00000100354	2878	*	5.09	6.29	6.11	5.51	4.34	29	39.17	85.86	71.17	77.33	60.78	35.06	56.05	20.84	19.66	1.2	0.00433	0.0714	1.02	0.0208	0.171	0.42	0.394	0.646	1.18	0.0106	0.0263	40440820	40731811	+	23	10346	TTS	ADSL	18886	promoter-TSS	0.041377	0.532152	NM_001317923	Gain	Unchanged	Unchanged	Gain
TSPYL5	chr8	98286727	98291477	ENSG00000180543	4751	*	5.83	6.96	6.64	6.67	3.9	40	74.06	121.21	128.57	83.7	116.04	108.61	94.59	15.23	14.56	1.13	0.00436	0.0714	0.81	0.0594	0.263	0.83	0.0449	0.213	2.18	3.7e-06	2.99e-05	98285716	98290176	-	0	1074	TSS	KB-1000E4.2	34670	exon	0.032638	0.526737	NM_033512, exon 1 of 1	Gain	Unchanged	Unchanged	Gain
SGTA	chr19	2777338	2780639	ENSG00000104969	3302	*	4.99	6.26	5.38	5.91	2.95	23	40.59	69.87	83.42	39.06	44.21	65.85	54.3	9.62	5.83	1.27	0.00437	0.0714	0.39	0.45	0.676	0.92	0.0516	0.229	2.27	0.000112	0.000585	2754711	2783369	-	11	4380	TSS	THOP1	6468	intron	0.018485	0.534384	NM_003021, intron 1 of 11	Gain	Unchanged	Unchanged	Gain
PDXK	chr21	45136455	45141361	ENSG00000160209	4907	*	6.71	7.89	7.52	7.94	5.5	59	150.97	212.96	261.73	145.88	221.82	269.39	221.58	55.3	34.95	1.18	0.00436	0.0714	0.81	0.0692	0.282	1.23	0.00363	0.054	1.61	0.000129	0.000657	45138977	45182188	+	10	69	TSS	RRP1B	22950	promoter-TSS	0.056677	0.620057	NM_003681	Gain	Unchanged	Gain	Gain
TMEM198B	chr12	56219975	56225157	ENSG00000182796	5183	*	6	7.05	6.99	6.77	4.87	52	76.2	134.68	130.1	105.23	148.4	113.74	104.22	34.46	24.03	1.05	0.00439	0.0715	0.98	0.0124	0.137	0.77	0.0461	0.215	1.46	0.000433	0.00185	56223528	56230028	+	4	962	TSS	RP11-762I7.5	1236	promoter-TSS	0.034549	0.550174	NR_036476	Gain	Unchanged	Unchanged	Gain
PNO1	chr2	68381449	68388800	ENSG00000115946	7352	*	6.34	7.49	6.6	6.9	5.46	49	113.23	180.98	179.08	92.47	101.04	134.27	105.1	44.08	43.69	1.15	0.00439	0.0715	0.25	0.573	0.761	0.56	0.196	0.455	1.35	0.000689	0.00275	68384975	68403370	+	6	150	TSS	WDR92	446	promoter-TSS	0.021633	0.442797	NM_001256476	Gain	Unchanged	Unchanged	Gain
AXIN1	chr16	363759	370056	ENSG00000103126	6298	*	5.7	6.92	6.9	7.15	5.22	31	72.64	111.95	130.1	108.42	131.04	160.78	123.49	44.08	30.58	1.22	0.00444	0.0719	1.21	0.00625	0.105	1.46	0.00079	0.023	1.08	0.00994	0.0251	337439	402659	-	10	29468	TTS	PDIA2	29692	intron	0.027637	0.524377	NM_181050, intron 2 of 9	Gain	Unchanged	Gain	Gain
AC018628.1	chr17	60096848	60100108	ENSG00000221302	3261	*	5.55	6.67	6.48	6.87	4.49	39	54.83	112.8	91.07	84.5	93.94	133.41	99.84	21.64	23.3	1.12	0.00448	0.0721	0.93	0.0223	0.176	1.31	0.000923	0.0249	1.45	0.000879	0.00338	60093217	60093298	-	0	5180	TSS	MED13	44165	intron	0.020252	0.45	NM_005121, intron 8 of 29	Gain	Unchanged	Gain	Gain
ZNF335	chr20	44596190	44601361	ENSG00000198026	5172	*	7.71	8.82	8.03	8.25	5.39	123	296.96	442.76	463.01	216.04	306.28	319.84	289.02	46.48	37.14	1.11	0.00448	0.0721	0.31	0.461	0.683	0.54	0.189	0.446	2.47	3.02e-09	5.39e-08	44577292	44600833	-	27	2058	TSS	FTLP1	5112	intron	0.034236	0.568362	NM_022095, intron 2 of 27	Gain	Unchanged	Unchanged	Gain
SRRM1	chr1	24967752	24971100	ENSG00000133226	3349	*	6.68	7.76	7.28	7.43	4.77	67	138.15	215.49	218.11	121.17	189.45	196.69	148.01	38.47	16.02	1.08	0.0045	0.0723	0.6	0.158	0.411	0.75	0.0643	0.258	2.16	0.00221	0.00729	24969502	24999758	+	17	76	TSS	NCMAP	33610	promoter-TSS	0.065432	0.574373	NR_159380	Gain	Unchanged	Unchanged	Gain
TSR3	chr16	1381369	1408382	ENSG00000007520	27014	*	9.28	10.31	10.31	10.79	8.19	448	795.46	1117.01	1417.35	1039.52	1497.47	1953.26	1580.85	328.56	255.59	1.03	0.00451	0.0724	1.03	0.00927	0.122	1.51	7.58e-05	0.00571	1.32	0.000177	0.000863	1399240	1401912	-	5	4364	TTS	BAIAP3	4564	intron	0.045572	0.637952	NM_001199098, intron 20 of 33	Gain	Unchanged	Gain	Gain
RP11-69H7.3	chr15	75493729	75510162	ENSG00000261779	16434	*	9.59	10.62	10.29	10.58	7.48	551	988.44	1542.1	1600.25	1116.85	1394.85	1739.46	1313.73	181.91	175.49	1.03	0.00452	0.0725	0.71	0.0695	0.282	0.99	0.0103	0.0969	2.28	1.12e-10	2.78e-09	75503641	75504508	-	1	1696	TTS	C15orf39	2564	intron	0.025134	0.597456	NM_015492, intron 2 of 2	Gain	Unchanged	Unchanged	Gain
KB-1507C5.2	chr8	103874930	103877868	ENSG00000253320	2939	*	6.5	7.56	6.85	7.04	4.85	63	117.5	175.09	202.04	99.65	131.83	118.87	143.63	25.64	32.04	1.06	0.00455	0.0727	0.36	0.386	0.627	0.54	0.175	0.43	1.84	1.28e-05	8.78e-05	103876711	103989909	+	3	312	TSS	AZIN1	14173	promoter-TSS	0.074906	0.591219	NM_001363024	Gain	Unchanged	Unchanged	Gain
SNAI1	chr20	48596543	48604763	ENSG00000124216	8221	*	7.43	8.47	7.86	8	6.28	115	230.73	329.97	380.36	199.3	264.44	292.48	218.95	80.94	74.27	1.04	0.00455	0.0727	0.42	0.285	0.541	0.56	0.147	0.394	1.47	5.8e-05	0.000331	48599535	48605423	+	2	1118	TSS	RNU6-147P	11904	exon	0.030539	0.557299	NM_005985, exon 2 of 3	Gain	Unchanged	Unchanged	Gain
FLJ00418	chr16	70693281	70701248	ENSG00000268927	7968	*	8.29	9.32	9.07	9.3	5.93	211	415.18	570.71	709.44	428.09	644.93	748.29	515.86	67.32	54.61	1.03	0.00458	0.0731	0.78	0.0507	0.246	1.01	0.00899	0.0897	2.48	5.82e-11	1.55e-09	70695569	70699739	+	0	1696	TSS	MTSS1L	2158	3' UTR	0.029751	0.608385	NM_138383, exon 15 of 15	Gain	Unchanged	Gain	Gain
SLC12A7	chr5	1110414	1114018	ENSG00000113504	3605	*	4.6	6.11	5.32	5.89	5.1	15	33.47	42.93	95.66	34.28	45.78	59.86	58.68	39.27	29.13	1.52	0.00459	0.0732	0.72	0.196	0.453	1.29	0.0106	0.0982	0.31	0.473	0.542	1050498	1112150	-	23	66	TSS	MIR4635	49127	promoter-TSS	0.051346	0.655938	NM_006598	Gain	Unchanged	Gain	Unchanged
AC006538.4	chr19	2714507	2723840	ENSG00000267001	9334	*	7.22	8.28	8.52	8.03	5.37	103	195.84	255.89	366.58	283.8	452.32	320.7	200.56	44.08	38.59	1.06	0.0046	0.0732	1.3	0.0011	0.0473	0.8	0.0431	0.208	2.02	2.74e-07	3e-06	2717766	2740046	-	2	1408	TTS	DIRAS1	2242	intron	0.044256	0.624879	NM_145173, intron 1 of 1	Gain	Gain	Unchanged	Gain
FGF17	chr8	21904882	21910490	ENSG00000158815	5609	*	5.92	6.98	7.11	6.77	5.52	49	71.93	115.32	136.99	125.95	150.77	107.75	111.23	52.89	38.59	1.06	0.00464	0.0736	1.19	0.00176	0.0572	0.86	0.026	0.16	0.8	0.0425	0.0796	21899908	21906317	+	4	1369	TTS	DMTN	3394	intron	0.039058	0.595578	NM_001323382, intron 1 of 15	Gain	Gain	Unchanged	Unchanged
KCTD13	chr16	29913786	29920079	ENSG00000174943	6294	*	6.11	7.19	6.81	7.03	4.76	50	88.3	142.26	149.23	109.21	115.25	156.5	105.1	35.26	18.93	1.08	0.00464	0.0736	0.7	0.0827	0.307	0.92	0.0245	0.154	1.7	0.000106	0.000556	29916332	29937530	-	6	600	TTS	ASPHD1	4754	TTS	0.018754	0.506436	NR_110933	Gain	Unchanged	Unchanged	Gain
FOXP4	chr6	41510916	41518481	ENSG00000137166	7566	*	6.12	7.29	6.9	7.55	5.89	42	97.56	150.67	162.24	99.65	139.72	206.1	168.16	67.32	50.97	1.16	0.00467	0.0738	0.78	0.0799	0.302	1.42	0.00064	0.0205	0.75	0.0554	0.0985	41514163	41570122	+	16	536	TSS	RP11-328M4.2	718	promoter-TSS	0.044553	0.591672	NR_126417	Gain	Unchanged	Gain	Unchanged
CDCA2	chr8	25314940	25318708	ENSG00000184661	3769	*	5.27	6.52	6.05	6.03	5.06	25	51.99	103.54	80.36	53.41	78.94	59.01	71.82	38.47	28.4	1.26	0.00467	0.0738	0.78	0.106	0.344	0.76	0.105	0.331	0.66	0.129	0.192	25316512	25365436	+	14	312	TSS	KCTD9	841	promoter-TSS	0.052296	0.544055	NM_017634	Gain	Unchanged	Unchanged	Unchanged
DDX54	chr12	113608264	113625308	ENSG00000123064	17045	*	8.65	9.72	9.25	9.11	6.71	251	551.19	829.13	854.08	534.91	678.87	623.43	483.45	128.22	81.56	1.07	0.00471	0.0739	0.6	0.139	0.39	0.46	0.242	0.505	2.11	8.99e-08	1.12e-06	113594978	113623284	-	19	6498	TSS	RITA1	6544	exon	0.024468	0.52165	NM_001111322, exon 5 of 20	Gain	Unchanged	Unchanged	Gain
PRNP	chr20	4666530	4668892	ENSG00000171867	2363	*	7.04	8.05	7.34	6.81	4.55	94	169.49	243.27	288.52	135.52	188.66	127.42	96.34	26.45	20.39	1.01	0.0047	0.0739	0.3	0.451	0.676	-0.24	0.535	0.753	2.56	1.61e-09	3.05e-08	4666881	4682236	+	1	830	TSS	PRND	34844	intron	0.069886	0.57663	NM_001080123, intron 1 of 1	Gain	Unchanged	Unchanged	Gain
TMEM189-UBE2V1	chr20	48739971	48748668	ENSG00000124208	8698	*	6.15	7.18	6.73	7.87	5.61	67	75.49	117	173.72	88.49	123.14	289.05	178.67	52.09	45.87	1.03	0.00473	0.0741	0.57	0.134	0.383	1.71	3.3e-06	0.000742	1.19	0.00117	0.0043	48697660	48770174	-	7	25854	TSS	TMEM189	26016	intron	0.017249	0.529378	NR_027889, intron 6 of 6	Gain	Unchanged	Gain	Gain
C9orf163	chr9	139374482	139381108	ENSG00000196366	6627	*	7.78	8.83	8.45	8.48	5.86	141	297.67	409.93	500.51	303.73	393.9	378.85	335.44	72.12	44.42	1.05	0.0048	0.0748	0.67	0.0918	0.321	0.7	0.0681	0.266	2.05	4.71e-07	4.87e-06	139377946	139380518	+	0	151	TSS	SEC16A	5654	promoter-TSS	0.053585	0.578931	NM_014866	Gain	Unchanged	Unchanged	Gain
RP4-806M20.3	chr20	57402750	57406396	ENSG00000268333	3647	*	4.79	6.16	6.08	6.1	4.72	16	39.17	70.71	71.94	55.01	80.52	79.53	57.8	28.85	24.03	1.37	0.0048	0.0748	1.3	0.011	0.13	1.32	0.0088	0.0888	0.93	0.0367	0.0709	57408863	57411584	-	1	4290	TTS	GNAS-AS1	10600	intron	0.009053	0.475315	NR_002785, intron 4 of 4	Gain	Unchanged	Gain	Unchanged
ZSCAN32	chr16	3429194	3433690	ENSG00000140987	4497	*	5.74	6.79	7.14	7.06	4.97	46	60.53	115.32	106.38	141.9	140.51	123.15	143.63	32.06	30.58	1.06	0.00482	0.0748	1.41	0.000161	0.0178	1.32	0.00041	0.0158	1.3	0.00121	0.00443	3432084	3451065	-	6	642	TTS	NAA60	16331	TTS	0.010456	0.4504	NM_001324344	Gain	Gain	Gain	Gain
MTA2	chr11	62364828	62372763	ENSG00000149480	7936	*	6.61	7.67	7.52	7.9	5.88	67	128.9	186.87	221.17	170.6	197.35	272.81	204.07	69.72	48.06	1.06	0.00488	0.0755	0.91	0.0202	0.17	1.28	0.000938	0.0251	1.16	0.00262	0.00839	62360685	62369312	-	17	516	TSS	EML3	894	promoter-TSS	0.040333	0.554631	NM_001330292	Gain	Unchanged	Gain	Gain
ACLY	chr17	40051076	40055721	ENSG00000131473	4646	*	5.21	6.34	5.76	6.07	4.87	39	34.89	77.44	84.18	39.86	68.68	85.52	49.05	33.66	24.76	1.13	0.00488	0.0755	0.55	0.23	0.489	0.86	0.053	0.232	0.86	0.0477	0.0875	40023183	40075272	-	28	21874	TSS	KLHL11	31714	intron	0.016796	0.525296	NM_001096, intron 13 of 28	Gain	Unchanged	Unchanged	Unchanged
MED7	chr5	156562701	156571304	ENSG00000155868	8604	*	6.3	7.32	7.43	6.84	5.46	61	96.14	170.03	149.23	177.77	168.14	114.6	114.73	45.68	42.23	1.02	0.0049	0.0756	1.14	0.00213	0.0634	0.55	0.154	0.403	1.41	0.000159	0.000787	156565856	156586030	-	2	1146	TTS	HAVCR2	2878	intron	0.020228	0.441125	NM_004270, intron 1 of 1	Gain	Gain	Unchanged	Gain
CDKN1C	chr11	2904654	2909466	ENSG00000129757	4813	*	6.36	7.58	7.34	7.69	5.25	42	121.78	186.03	195.92	118.78	206.03	193.27	219.83	41.67	34.22	1.22	0.00492	0.0758	0.99	0.221	0.48	1.33	0.00252	0.0436	1.34	0.00268	0.00853	2904442	2907111	-	3	51	TSS	SLC22A18AS	1949	promoter-TSS	0.084806	0.658562	NM_001362475	Gain	Unchanged	Gain	Gain
ARHGEF19	chr1	16531891	16534106	ENSG00000142632	2216	*	5.44	6.53	5.69	5.14	3.1	49	37.74	91.75	92.6	46.24	56.84	45.33	25.4	12.82	4.37	1.09	0.00495	0.0763	0.25	0.561	0.753	-0.29	0.556	0.766	2.47	1.32e-05	9.04e-05	16524598	16539104	-	15	6106	TSS	ARHGEF19-AS1	8146	intron	0.066847	0.650113	NM_153213, intron 6 of 15	Gain	Unchanged	Unchanged	Gain
PAPD7	chr5	6712075	6722546	ENSG00000112941	10472	*	7.21	8.26	8.35	8.08	6.58	97	199.4	329.13	283.16	283.8	368.64	307.87	234.72	100.97	90.29	1.05	0.00497	0.0764	1.14	0.00381	0.0837	0.87	0.0257	0.159	1.08	0.00248	0.00801	6714717	6757161	+	12	2594	TSS	CTD-2044J15.1	9486	intron	0.047278	0.542164	NM_001171805, intron 1 of 12	Gain	Gain	Unchanged	Gain
SRC	chr20	35969470	35976340	ENSG00000197122	6871	*	5.98	7.23	7.07	6.61	5.68	32	94	154.04	146.17	128.35	141.3	109.46	85.83	57.7	45.15	1.25	0.00502	0.0766	1.1	0.0176	0.16	0.63	0.188	0.445	0.8	0.0556	0.0988	35973087	36033817	+	13	182	TSS	MANBAL	27242	promoter-TSS	0.026641	0.571761	NM_005417	Gain	Unchanged	Unchanged	Unchanged
CHMP5	chr9	33263967	33266530	ENSG00000086065	2564	*	5.26	6.48	5.98	5.53	4.83	27	49.85	98.49	79.59	59.79	66.31	56.44	35.91	32.06	24.76	1.21	0.00506	0.0771	0.71	0.123	0.368	0.27	0.607	0.799	0.74	0.101	0.159	33265036	33281977	+	7	212	TSS	BAG1	490	promoter-TSS	0.051522	0.577838	NM_001349286	Gain	Unchanged	Unchanged	Unchanged
ZNF12	chr7	6745370	6746959	ENSG00000164631	1590	*	5.04	6.26	5.47	5.26	4.6	26	39.88	66.5	87.24	38.26	50.52	47.04	29.78	28.05	20.39	1.22	0.00511	0.0774	0.43	0.385	0.627	0.22	0.675	0.841	1.03	0.0223	0.0477	6728063	6746554	-	5	390	TSS	AC073343.13	2368	5' UTR	0.071159	0.596602	NM_016265, exon 1 of 5	Gain	Unchanged	Unchanged	Gain
SPECC1L-ADORA2A	chr22	24716799	24719638	ENSG00000258555	2840	*	4.99	6.17	6.15	6.3	4.59	37	26.35	69.87	74.23	67.76	74.2	76.97	80.58	25.64	22.57	1.19	0.00511	0.0774	1.16	0.00704	0.11	1.31	0.00182	0.036	1.26	0.0042	0.0124	24666865	24838324	+	19	51354	TSS	SPECC1L	51434	exon	0.015856	0.423389	NM_015330, exon 5 of 17	Gain	Unchanged	Gain	Gain
PMPCA	chr9	139307321	139319427	ENSG00000165688	12107	*	7.8	8.86	8.43	8.64	6.37	139	305.51	414.99	515.05	285.39	403.38	469.5	331.06	94.56	71.36	1.07	0.00509	0.0774	0.63	0.122	0.366	0.85	0.0347	0.185	1.64	1.96e-05	0.000128	139305111	139318213	+	12	4839	TTS	SDCCAG3	8313	intron	0.032549	0.550719	NM_001282944, intron 9 of 11	Gain	Unchanged	Unchanged	Gain
CDC45	chr22	19470501	19472959	ENSG00000093009	2459	*	5.91	7.04	6.73	5.61	4.32	40	80.47	133.84	129.34	114.79	97.09	53.02	44.67	21.64	18.2	1.13	0.0051	0.0774	0.81	0.0559	0.257	-0.3	0.49	0.722	1.92	1.91e-05	0.000125	19466981	19508135	+	19	4749	TSS	UFD1L	4992	intron	0.013838	0.460537	NM_001369291, intron 5 of 18	Gain	Unchanged	Unchanged	Gain
ZSWIM4	chr19	13904520	13908293	ENSG00000132003	3774	*	5.25	6.47	5.65	4.41	4.52	27	49.14	74.92	102.55	48.63	52.1	18.81	23.65	23.24	22.57	1.22	0.00515	0.0776	0.4	0.406	0.643	-0.84	0.119	0.352	1.12	0.0138	0.0325	13906273	13943044	+	12	134	TSS	CTD-3252C9.2	980	5' UTR	0.039767	0.57938	NM_001367834, exon 1 of 14	Gain	Unchanged	Unchanged	Gain
TRAF2	chr9	139799826	139804719	ENSG00000127191	4894	*	5.22	6.6	6.35	6.71	4.87	17	57.68	97.64	96.43	77.33	86.04	115.45	93.71	25.64	32.77	1.38	0.00515	0.0776	1.13	0.0281	0.193	1.49	0.00275	0.046	0.8	0.0911	0.146	139776384	139820463	+	11	18190	TTS	MIR4479	21018	intron	0.03659	0.570815	NM_021138, intron 4 of 10	Gain	Unchanged	Gain	Unchanged
AP001266.1	chr11	65542384	65550631	ENSG00000175827	8248	*	8.01	9.05	9.21	9.23	6.16	163	353.22	530.31	532.65	488.67	698.61	658.5	545.63	86.55	56.8	1.04	0.00517	0.0777	1.2	0.00312	0.0763	1.22	0.00173	0.035	1.96	9.75e-07	9.28e-06	65545091	65547316	-	5	808	TSS	AP5B1	1766	exon	0.044628	0.627865	NM_138368, exon 2 of 2	Gain	Gain	Gain	Gain
PGS1	chr17	76376815	76379166	ENSG00000087157	2352	*	4.9	6.16	5.82	5.78	4.38	22	37.74	70.71	71.94	59.79	52.89	64.14	45.54	24.04	17.48	1.26	0.00518	0.0778	0.92	0.0559	0.257	0.88	0.0727	0.275	1.04	0.0292	0.0591	76374720	76420635	+	9	3270	TSS	RP11-806H10.4	7998	intron	0.019574	0.46023	NR_111989, intron 1 of 8	Gain	Unchanged	Unchanged	Gain
MDFI	chr6	41605300	41615720	ENSG00000112559	10421	*	7	8.06	7.57	8.5	6.27	87	168.78	218.01	316.84	165.81	215.5	419.04	305.66	85.75	68.45	1.06	0.0052	0.0779	0.58	0.145	0.397	1.5	8.87e-05	0.00628	1.11	0.00264	0.00844	41604805	41621977	+	5	5705	TSS	NPM1P51	24133	intron	0.027162	0.58618	NM_001300805, intron 2 of 3	Gain	Unchanged	Gain	Gain
RP5-977B1.7	chr20	35105830	35111457	ENSG00000232907	5628	*	5.94	7.04	5.46	6.9	5.01	47	76.2	152.36	110.2	31.09	56.84	134.27	104.22	36.06	28.4	1.09	0.00522	0.078	-0.49	0.29	0.546	0.95	0.0163	0.124	1.45	0.000324	0.00144	35136562	35201678	-	4	27918	TTS	DLGAP4	48396	intron	0.010487	0.489959	NM_183006, intron 1 of 6	Gain	Unchanged	Unchanged	Gain
FKBP10	chr17	39966281	39984444	ENSG00000141756	18164	*	8.43	9.5	9.44	9.55	7.01	218	471.43	620.37	825.76	581.94	809.91	854.34	645.48	154.67	103.4	1.07	0.00523	0.0781	1.01	0.0127	0.138	1.12	0.00468	0.0629	1.68	9.98e-06	7.1e-05	39969182	39979465	+	9	4102	TTS	NT5C3B	5972	intron	0.029622	0.560095	NM_021939, intron 4 of 9	Gain	Unchanged	Gain	Gain
ZNF134	chr19	58125330	58128590	ENSG00000213762	3261	*	5.09	6.3	5.07	5.6	4.17	26	42.02	89.23	68.88	27.9	39.47	53.88	42.92	20.03	16.02	1.22	0.00535	0.0795	-0.01	0.961	0.981	0.51	0.293	0.555	1.49	0.00149	0.00528	58125618	58134724	+	3	1342	TSS	ZNF530	2870	intron	0.026388	0.513804	NM_003435, intron 1 of 2	Gain	Unchanged	Unchanged	Gain
CD44	chr11	35165366	35170075	ENSG00000026508	4710	*	5.42	6.53	5.35	4.67	4.72	38	47.71	102.69	81.89	31.09	50.52	32.5	18.39	28.85	24.03	1.11	0.00538	0.0799	-0.07	0.873	0.936	-0.75	0.14	0.384	1.17	0.00622	0.0171	35160416	35253949	+	17	7304	TSS	RP4-607I7.1	8142	intron	0.01062	0.471225	NM_001001389, intron 1 of 16	Gain	Unchanged	Unchanged	Gain
EPS8L2	chr11	719708	726152	ENSG00000177106	6445	*	5.6	6.86	6.69	7.03	5.18	28	69.08	92.59	140.05	84.5	122.35	146.24	114.73	49.69	22.57	1.26	0.0054	0.08	1.09	0.0192	0.166	1.43	0.0013	0.0298	0.76	0.111	0.17	694437	720212	+	21	2718	TTS	AP006621.9	4117	intron	0.044389	0.659528	NM_022772, intron 14 of 20	Gain	Unchanged	Gain	Unchanged
LAMC3	chr9	133940617	133946018	ENSG00000050555	5402	*	6.6	7.62	7.03	7.3	5.43	70	123.91	180.98	211.99	114	147.62	171.04	144.51	50.49	35.68	1.02	0.00542	0.08	0.43	0.279	0.535	0.7	0.0666	0.263	1.46	0.000227	0.00107	133884468	133968446	+	27	25128	TTS	AIF1L	28544	intron	0.022778	0.569339	NM_006059, intron 14 of 27	Gain	Unchanged	Unchanged	Gain
KIF21B	chr1	200938332	200944397	ENSG00000116852	6066	*	6.53	7.59	7.9	7.26	5.29	67	118.21	156.57	229.59	236.76	240.76	183.01	123.49	35.26	42.96	1.06	0.00546	0.0805	1.37	0.00024	0.0223	0.73	0.0679	0.265	1.6	4.1e-05	0.000245	200938519	200992828	-	34	2846	TTS	MROH3P	5706	3' UTR	0.021768	0.588458	NM_001252100, exon 35 of 35	Gain	Gain	Unchanged	Gain
NUP210	chr3	13385769	13390714	ENSG00000132182	4946	*	5.22	6.44	6.29	5.86	4.94	26	48.43	74.07	99.49	74.14	82.89	64.99	50.8	33.66	27.67	1.22	0.00547	0.0805	1.08	0.0161	0.154	0.64	0.18	0.435	0.75	0.0837	0.136	13357736	13461809	-	39	30506	TTS	AC027124.3	113552	intron	0.017799	0.522952	NM_024923, intron 20 of 39	Gain	Unchanged	Unchanged	Unchanged
CALB2	chr16	71408541	71412560	ENSG00000172137	4020	*	4.7	6.01	5.35	6.13	4.31	22	29.91	48.82	80.36	33.48	48.15	73.55	66.56	19.23	20.39	1.32	0.00546	0.0805	0.65	0.205	0.462	1.43	0.0014	0.0312	1.06	0.0253	0.0526	71392615	71424339	+	10	13788	TTS	RP11-510M2.1	33792	intron	0.010702	0.489425	NR_027910, intron 3 of 9	Gain	Unchanged	Gain	Gain
SNX11	chr17	46201533	46205704	ENSG00000002919	4172	*	4.81	6.14	6.69	6.78	4.66	17	39.17	72.39	68.88	103.63	103.41	113.74	105.97	20.84	29.86	1.33	0.0056	0.0815	1.88	3.84e-05	0.00811	1.97	1.24e-05	0.0018	0.97	0.0335	0.066	46180718	46196526	+	7	7092	TTS	SKAP1	7188	Intergenic	0.013909	0.479022		Gain	Gain	Gain	Unchanged
ARHGEF2	chr1	155918823	155922921	ENSG00000116584	4099	*	5.83	6.86	6.27	7.11	4.11	49	64.8	114.48	117.09	66.96	87.62	161.63	113.86	19.23	15.29	1.02	0.00558	0.0815	0.44	0.281	0.537	1.28	0.000891	0.0246	2.05	3.98e-06	3.19e-05	155916645	155972355	-	25	4227	TTS	RXFP4	8247	TTS	0.022211	0.54734	NR_106796	Gain	Unchanged	Gain	Gain
TTC4	chr1	55206651	55212366	ENSG00000243725	5716	*	5.67	6.88	7.12	6.62	5.07	30	71.93	106.9	128.57	133.13	145.25	108.61	88.46	42.47	24.76	1.21	0.00557	0.0815	1.45	0.000866	0.0428	0.95	0.0355	0.188	1.09	0.0138	0.0326	55181494	55208330	+	9	1178	TTS	MROH7-TTC4	1528	Intergenic	0.012601	0.515661		Gain	Gain	Unchanged	Gain
C17orf62	chr17	80405205	80408997	ENSG00000178927	3793	*	5.44	6.58	6.48	6.28	4.91	32	54.83	93.43	97.96	82.91	95.52	71.84	83.2	28.85	31.31	1.14	0.00557	0.0815	1.04	0.0148	0.149	0.84	0.0534	0.233	1.11	0.00775	0.0205	80400518	80408705	-	7	1604	TSS	RP13-20L14.6	5047	TTS	0.051174	0.571994	NR_036519	Gain	Unchanged	Unchanged	Gain
CHRNA4	chr20	61974167	61986918	ENSG00000101204	12752	*	6.4	7.55	7.25	7.71	7.48	50	118.93	161.62	211.99	110.01	194.98	266.82	152.39	205.15	151.46	1.15	0.00561	0.0816	0.85	0.0609	0.266	1.31	0.00292	0.0477	-0.27	0.447	0.518	61975420	62009345	-	5	5122	TTS	RP11-261N11.8	10796	intron	0.041412	0.638146	NR_046317, intron 5 of 5	Gain	Unchanged	Gain	Unchanged
RP1-102E24.1	chr12	6525639	6528354	ENSG00000213942	2716	*	5.65	6.76	6.8	6.97	4.45	43	57.68	131.31	85.71	125.16	97.09	129.99	119.99	23.24	20.39	1.11	0.00566	0.082	1.14	0.00379	0.0835	1.31	0.000528	0.0183	1.57	0.000289	0.00131	6518802	6519179	-	0	7818	TSS	RP1-102E24.9	20666	Intergenic	0.009948	0.457459		Gain	Gain	Gain	Gain
TERF2	chr16	69419057	69420769	ENSG00000132604	1713	*	5.22	6.35	5.23	5.77	3.61	42	32.76	88.38	74.23	27.9	47.36	63.28	45.54	12.02	12.38	1.12	0.00572	0.0827	0.01	0.974	0.988	0.54	0.221	0.482	1.98	9.02e-05	0.000483	69406171	69442474	-	9	13742	TTS	RP11-343C2.9	29704	promoter-TSS	0.066043	0.557827	NM_005652	Gain	Unchanged	Unchanged	Gain
SCARNA2	chr1	109640631	109646196	ENSG00000270066	5566	*	5.58	6.8	7.03	6.06	5.39	27	68.37	113.64	109.44	123.56	138.14	59.86	73.57	42.47	41.51	1.23	0.00573	0.0827	1.46	0.0011	0.0473	0.48	0.324	0.586	0.8	0.0511	0.0924	109642814	109643241	+	0	172	TTS	RP5-1065J22.4	2742	TTS	0.038102	0.512668	NR_003023	Gain	Gain	Unchanged	Unchanged
WIPI2	chr7	5228216	5231297	ENSG00000157954	3082	*	5.62	6.75	6.34	5.9	5.88	34	64.09	110.27	104.85	62.98	99.46	82.1	37.66	64.11	53.88	1.13	0.00576	0.0829	0.73	0.111	0.351	0.29	0.572	0.777	0.47	0.213	0.287	5229818	5273457	+	12	62	TSS	RNU6-215P	9964	promoter-TSS	0.047727	0.568322	NM_001278299	Gain	Unchanged	Unchanged	Unchanged
SNORA74A	chr5	138610378	138615513	ENSG00000200959	5136	*	6.44	7.46	7.04	7.21	4.01	109	64.09	207.07	146.17	148.28	114.46	153.08	142.76	18.43	13.84	1.03	0.00581	0.083	0.6	0.117	0.36	0.77	0.0372	0.193	2.69	2.33e-09	4.25e-08	138614469	138614667	+	0	1524	TSS	MATR3	3154	TTS	0.014414	0.447322	NR_145749	Gain	Unchanged	Unchanged	Gain
SIPA1	chr11	65400464	65411892	ENSG00000213445	11429	*	7.57	8.6	8.23	8.5	6.53	128	252.81	324.08	453.06	270.24	328.38	354.05	369.6	99.37	85.2	1.03	0.00584	0.0833	0.65	0.0903	0.319	0.93	0.0132	0.111	1.33	0.000254	0.00118	65405567	65418401	+	16	611	TSS	PCNXL3	1268	intron	0.031242	0.610956	NM_006747, intron 1 of 15	Gain	Unchanged	Unchanged	Gain
SLC29A1	chr6	44189428	44193910	ENSG00000112759	4483	*	5.89	6.9	6.12	6	4.75	54	64.8	108.59	130.1	65.37	73.41	65.85	62.18	32.06	21.85	1.01	0.00586	0.0835	0.22	0.579	0.765	0.11	0.794	0.905	1.44	0.000631	0.00255	44187241	44201888	+	13	4428	TSS	RP1-302G2.5	5696	5' UTR	0.03035	0.586568	NM_001078177, exon 1 of 14	Gain	Unchanged	Unchanged	Gain
L34079.2	chr19	44094723	44100005	ENSG00000268361	5283	*	6.52	7.55	7.2	7.62	5.29	64	119.64	176.77	198.21	124.36	168.93	245.44	148.89	44.08	34.22	1.03	0.00589	0.0838	0.68	0.0944	0.325	1.1	0.00676	0.0766	1.47	0.000286	0.0013	44058843	44097188	-	2	176	TSS	IRGQ	2923	exon	0.041848	0.591064	NM_001007561, exon 3 of 3	Gain	Unchanged	Gain	Gain
PWP2	chr21	45531671	45569209	ENSG00000241945	37539	*	10.07	11.1	10.84	11.19	8.32	790	1364.45	2033.68	2358.67	1519.43	2137.66	2621.16	2038.9	363.02	275.98	1.03	0.00593	0.0841	0.76	0.0602	0.265	1.11	0.00455	0.0621	1.94	9.53e-08	1.17e-06	45527170	45551063	+	20	623	TTS	C21orf33	3046	intron	0.032501	0.583862	NM_005049, intron 20 of 20	Gain	Unchanged	Gain	Gain
MIR4324	chr19	49812359	49815174	ENSG00000265407	2816	*	4.88	6.07	5.86	5.65	3.86	26	32.76	68.18	66.58	55.8	59.99	59.01	41.16	14.42	14.56	1.2	0.00596	0.0843	0.98	0.0317	0.203	0.77	0.108	0.335	1.43	0.00437	0.0128	49812053	49812125	-	0	1642	TSS	SLC6A16	14716	exon	0.013859	0.50302	NM_014037, exon 3 of 12	Gain	Unchanged	Unchanged	Gain
HBEGF	chr5	139724026	139727635	ENSG00000113070	3610	*	5.02	6.26	6.12	5.87	4.83	23	42.02	67.34	85.71	58.99	79.73	68.42	48.17	26.45	30.58	1.24	0.00606	0.0851	1.09	0.0196	0.167	0.84	0.0817	0.291	0.85	0.05	0.0908	139712427	139726216	-	6	386	TSS	CTC-329D1.3	2238	intron	0.033814	0.550014	NM_001945, intron 1 of 5	Gain	Unchanged	Unchanged	Unchanged
AP5M1	chr14	57732782	57736976	ENSG00000053770	4195	*	5.48	6.68	5.52	5.77	5.16	27	61.96	105.22	99.49	36.67	55.26	58.15	50.8	40.87	30.58	1.2	0.00607	0.0851	0.05	0.948	0.975	0.29	0.562	0.771	0.87	0.0411	0.0776	57735626	57756797	+	8	747	TSS	EXOC5	847	promoter-TSS	0.033627	0.433238	NR_026895	Gain	Unchanged	Unchanged	Unchanged
ZNF77	chr19	2948744	2954825	ENSG00000175691	6082	*	5.72	6.83	6.98	6.46	4.84	36	69.08	118.69	109.44	114	138.14	91.51	84.95	35.26	21.85	1.12	0.00609	0.0854	1.26	0.00239	0.0665	0.75	0.0809	0.29	1.21	0.00654	0.0178	2933215	2944931	-	3	6854	TSS	AC006277.2	24980	Intergenic	0.030757	0.497944		Gain	Gain	Unchanged	Gain
UHRF2	chr9	6411765	6414764	ENSG00000147854	3000	*	5.06	6.36	6.4	5.15	3.83	22	44.86	60.61	104.08	75.73	93.15	39.34	31.53	16.83	11.65	1.3	0.00611	0.0855	1.34	0.00352	0.0807	0.08	0.896	0.955	1.57	0.00235	0.00768	6413150	6507054	+	16	114	TSS	RP11-307L3.4	1880	promoter-TSS	0.076718	0.59053	NM_152896	Gain	Gain	Unchanged	Gain
LA16c-312E8.2	chr16	1442670	1450530	ENSG00000260132	7861	*	5.16	7.44	7.25	7.81	6.18	20	51.27	107.74	238.78	133.13	170.51	241.16	207.57	79.34	65.54	2.28	0.00615	0.0856	2.09	3.22e-06	0.00202	2.65	4.49e-10	9.61e-07	0.11	0.75	0.792	1458834	1462249	+	1	12234	TSS	UNKL	18092	intron	0.035373	0.583969	NM_001193388, intron 6 of 14	Gain	Gain	Gain	Unchanged
RP11-126K1.6	chr1	151318397	151322776	ENSG00000237976	4380	*	5.44	6.66	5.62	7.11	5.04	27	59.82	85.02	117.09	59.79	38.68	147.09	128.75	35.26	30.58	1.22	0.00612	0.0856	0.18	0.737	0.863	1.67	8.93e-05	0.00628	0.86	0.0453	0.084	151319442	151320503	+	1	84	TTS	RFX5	860	promoter-TSS	0.020557	0.4839	NM_001025603	Gain	Unchanged	Gain	Unchanged
COL5A1-AS1	chr9	137607666	137617732	ENSG00000204011	10067	*	6.96	7.97	7.77	7.78	6.18	86	162.37	218.86	283.16	192.12	245.5	256.56	183.05	80.14	64.81	1.02	0.00615	0.0856	0.82	0.0349	0.212	0.82	0.0341	0.184	1.23	0.000721	0.00285	137541230	137544689	-	1	68010	TSS	COL5A1	79080	intron	0.025633	0.578283	NM_001278074, intron 4 of 65	Gain	Unchanged	Unchanged	Gain
FASTK	chr7	150772701	150781529	ENSG00000164896	8829	*	6.27	7.37	7.24	7.55	4.73	48	106.11	165.83	164.54	133.13	169.72	206.1	168.16	29.65	23.3	1.1	0.00613	0.0856	0.97	0.021	0.172	1.28	0.00177	0.0356	1.71	0.000122	0.000628	150773715	150777953	-	9	838	TSS	TMUB1	1051	intron	0.046902	0.628002	NM_001258461, intron 1 of 9	Gain	Unchanged	Gain	Gain
RNF34	chr12	121901905	121906044	ENSG00000170633	4140	*	4.64	6.05	6.06	6.02	4.9	15	34.89	49.66	82.65	62.18	71.04	66.7	63.06	25.64	34.22	1.41	0.00614	0.0856	1.42	0.00455	0.0901	1.38	0.00566	0.0696	0.46	0.315	0.39	121837946	121868389	+	6	35586	TTS	KDM2B	37076	intron	0.072257	0.609084	NM_032590, intron 12 of 22	Gain	Gain	Gain	Unchanged
KIF1A	chr2	241716690	241725048	ENSG00000130294	8359	*	6.3	7.45	6.89	7.67	6.04	44	113.23	164.14	185.97	83.7	153.14	237.74	169.91	81.74	50.24	1.15	0.00616	0.0856	0.59	0.216	0.474	1.37	0.00155	0.033	0.6	0.151	0.218	241653182	241759725	-	49	38856	TSS	AQP12A	82969	intron	0.04212	0.623116	NM_004321, intron 10 of 46	Gain	Unchanged	Gain	Unchanged
SLBP	chr4	1689290	1694761	ENSG00000163950	5472	*	5.76	6.91	7.2	6.98	4.7	34	74.06	112.8	127.04	132.33	161.82	136.83	116.48	28.85	23.3	1.15	0.00617	0.0858	1.44	0.00065	0.0375	1.23	0.00383	0.0559	1.29	0.00434	0.0128	1694526	1714282	-	7	2500	TTS	FAM53A	6038	Intergenic	0.019013	0.482362		Gain	Gain	Gain	Gain
ABHD11	chr7	73147368	73153728	ENSG00000106077	6361	*	7.65	8.76	8.23	8.13	5.61	112	289.84	393.1	472.19	277.42	323.65	318.13	241.73	65.71	32.04	1.11	0.00621	0.0861	0.58	0.171	0.427	0.48	0.261	0.524	2.25	0.00191	0.00644	73150423	73153197	-	5	125	TTS	LINC00035	164	TTS	0.036955	0.590881	NR_026690	Gain	Unchanged	Unchanged	Gain
MIR4683	chr10	35927629	35932236	ENSG00000264780	4608	*	5.73	6.78	6.96	6.35	5.89	49	56.97	90.07	129.34	120.37	129.46	99.2	63.93	68.12	50.24	1.05	0.00628	0.0869	1.24	0.000901	0.0436	0.62	0.13	0.369	0.32	0.404	0.477	35930099	35930180	-	0	166	TTS	FZD8	430	TTS	0.099218	0.665726	NR_039831	Gain	Gain	Unchanged	Unchanged
SRC	chr20	36015501	36017974	ENSG00000197122	2474	*	4.89	6.11	5.46	5.71	4.49	23	36.32	64.82	73.47	40.66	47.36	59.86	44.67	20.03	24.76	1.22	0.00633	0.0872	0.57	0.255	0.514	0.82	0.0915	0.308	0.86	0.0677	0.115	35973087	36033817	+	13	17080	TTS	RPL7AP14	56396	intron	0.019822	0.583097	NM_198291, intron 5 of 13	Gain	Unchanged	Unchanged	Unchanged
NPM3	chr10	103537896	103541408	ENSG00000107833	3513	*	4.75	6.01	5.74	5.33	5.21	21	32.76	56.4	72.7	42.25	64.73	41.05	39.41	42.47	31.31	1.26	0.00631	0.0872	0.99	0.0459	0.236	0.58	0.258	0.521	0.16	0.698	0.746	103541081	103543170	-	5	1429	TTS	FGF8	3798	intron	0.043862	0.607346	NM_001206389, intron 1 of 4	Gain	Unchanged	Unchanged	Unchanged
ATRX	chrX	77039980	77042406	ENSG00000085224	2427	*	5.46	6.57	5.83	6.32	3.51	33	54.83	99.33	91.07	53.41	59.99	87.23	72.69	9.62	13.11	1.12	0.00638	0.0874	0.37	0.423	0.655	0.86	0.0436	0.209	2.22	1.37e-05	9.38e-05	76760355	77041702	-	35	509	TSS	MAGT1	40667	intron	0.033814	0.468673	NM_138270, intron 1 of 33	Gain	Unchanged	Unchanged	Gain
EBNA1BP2	chr1	43631012	43634222	ENSG00000117395	3211	*	4.81	6.03	5.09	5.05	4.23	26	29.91	76.6	54.34	31.09	37.1	43.61	22.77	21.64	16.02	1.23	0.00637	0.0874	0.29	0.577	0.764	0.25	0.648	0.825	1.17	0.0143	0.0334	43637280	43736607	-	9	4663	TTS	WDR65	5202	intron	0.009037	0.43676	NM_001159936, intron 7 of 9	Gain	Unchanged	Unchanged	Gain
SUB1	chr5	32590434	32594309	ENSG00000113387	3876	*	5.78	6.82	5.85	6.19	4.38	49	60.53	133	93.37	48.63	67.1	89.8	56.05	26.45	15.29	1.05	0.00643	0.0879	0.08	0.859	0.929	0.41	0.327	0.589	1.73	0.000104	0.000548	32531738	32601429	+	5	9058	TTS	CTD-2004A9.1	54298	intron	0.013165	0.416	NM_006713, intron 3 of 4	Gain	Unchanged	Unchanged	Gain
RP11-295M3.2	chr16	53161466	53166247	ENSG00000261291	4782	*	6.88	7.9	8.4	8.08	4.9	78	157.38	231.48	244.9	273.43	403.38	293.33	247.86	31.25	28.4	1.02	0.00652	0.0888	1.52	0.00014	0.0165	1.2	0.00178	0.0356	2.19	1.2e-07	1.43e-06	53202433	53203362	+	1	38576	TSS	CHD9	74912	intron	0.060879	0.560134	NM_025134, intron 1 of 38	Gain	Gain	Gain	Gain
WI2-85898F10.1	chr22	46258635	46263675	ENSG00000235091	5041	*	5.52	6.69	6.99	6.6	5.73	29	62.67	111.11	95.66	95.66	157.88	115.45	78.82	68.12	37.87	1.17	0.00658	0.089	1.47	0.00118	0.0481	1.08	0.0166	0.125	0.43	0.307	0.383	46271878	46283628	-	2	10723	TTS	ATXN10	19968	Intergenic	0.046636	0.565873		Gain	Gain	Unchanged	Unchanged
RP11-549L6.3	chr10	111984176	111987359	ENSG00000228417	3184	*	6.07	7.11	6.24	6.68	4.47	48	86.17	134.68	142.35	58.19	93.15	127.42	77.07	21.64	22.57	1.05	0.00656	0.089	0.17	0.706	0.844	0.61	0.158	0.409	1.75	8.01e-05	0.000437	111967607	111968349	-	2	17418	TSS	MXI1	18406	promoter-TSS	0.07511	0.6164	NM_005962	Gain	Unchanged	Unchanged	Gain
LRRC3DN	chr21	45878577	45884874	ENSG00000269430	6298	*	5.98	7.16	6.74	6.87	5.82	34	91.87	146.47	140.05	102.04	112.09	128.28	105.97	67.32	45.87	1.19	0.00658	0.089	0.77	0.097	0.329	0.9	0.0494	0.224	0.55	0.191	0.263	45879813	45882078	+	0	352	TTS	LRRC3	2986	3' UTR	0.028272	0.599174	NM_030891, exon 2 of 2	Gain	Unchanged	Unchanged	Unchanged
CCDC130	chr19	13860915	13870384	ENSG00000104957	9470	*	6.45	7.56	7.43	7.38	5.45	51	123.91	196.13	182.14	167.41	178.4	171.89	161.15	51.29	36.41	1.11	0.00654	0.089	0.98	0.0205	0.171	0.93	0.0276	0.164	1.26	0.00323	0.00999	13842573	13874110	+	10	8460	TTS	MRI1	9696	intron	0.021969	0.51959	NM_001320569, intron 2 of 8	Gain	Unchanged	Unchanged	Gain
PLK1	chr16	23690083	23696452	ENSG00000166851	6370	*	5.92	6.97	6.52	6.89	5.25	46	75.49	136.36	114.8	75.73	107.36	118.02	119.11	44.08	32.04	1.05	0.00656	0.089	0.59	0.16	0.414	0.96	0.0136	0.113	1.1	0.00651	0.0177	23688976	23701687	+	9	4292	TSS	CTD-2196E14.5	5102	intron	0.022299	0.512482	NM_005030, intron 3 of 9	Gain	Unchanged	Unchanged	Gain
FTSJ2	chr7	2271557	2279552	ENSG00000122687	7996	*	7.49	8.6	8.57	8.5	6.6	97	261.35	396.47	377.3	421.71	339.44	384.84	340.69	117	76.46	1.11	0.00656	0.089	1.09	0.0116	0.132	1.02	0.016	0.123	1.31	0.000876	0.00337	2273865	2281804	-	3	1690	TTS	MAD1L1	2676	intron	0.030648	0.509944	NM_013393, intron 2 of 2	Gain	Unchanged	Unchanged	Gain
AACS	chr12	125611940	125616609	ENSG00000081760	4670	*	4.92	6.14	5.77	6.03	4.76	22	38.46	72.39	68.88	54.21	55.26	82.1	48.17	25.64	28.4	1.22	0.00666	0.0894	0.86	0.0752	0.293	1.11	0.023	0.149	0.92	0.0361	0.0699	125549924	125627866	+	17	13592	TTS	RP11-158L12.5	20328	intron	0.020994	0.488327	NM_023928, intron 14 of 17	Gain	Unchanged	Unchanged	Unchanged
CSNK1G2-AS1	chr19	1958981	1964755	ENSG00000180846	5775	*	4.89	6.27	6.58	7.13	4.48	21	38.46	46.3	107.91	82.11	109.72	138.54	141.88	17.63	26.94	1.37	0.00669	0.0896	1.69	0.000162	0.0178	2.24	6.13e-08	5.07e-05	1.04	0.0275	0.0563	1952529	1954548	-	3	7320	TSS	CSNK1G2	19469	intron	0.033778	0.571354	NM_001319, intron 1 of 11	Gain	Gain	Gain	Gain
OSMR	chr5	38890830	38893580	ENSG00000145623	2751	*	5.74	6.75	6.97	6.97	4.62	46	60.53	111.11	104.85	130.74	119.99	135.98	114.73	29.65	19.66	1.02	0.0067	0.0896	1.23	0.00112	0.0477	1.23	0.00109	0.0271	1.35	0.00193	0.00652	38846100	38935743	+	17	43538	TTS	RICTOR	45815	intron	0.008367	0.491273	NM_003999, intron 7 of 17	Gain	Gain	Gain	Gain
CCDC62	chr12	123301523	123306856	ENSG00000130783	5334	*	5.18	6.35	6.52	5.69	4.96	32	40.59	99.33	63.52	86.89	97.09	47.04	56.05	26.45	35.68	1.17	0.00675	0.0901	1.34	0.00105	0.0464	0.51	0.265	0.528	0.95	0.0245	0.0515	123258873	123312075	+	12	7886	TTS	HIP1R	15782	intron	0.017254	0.472717	NR_027918, intron 11 of 12	Gain	Gain	Unchanged	Unchanged
CENPI	chrX	100420764	100424318	ENSG00000102384	3555	*	5.01	6.22	5.99	5.78	3.61	26	38.46	88.38	60.46	79.72	47.36	53.02	56.93	12.82	11.65	1.21	0.00676	0.0901	0.98	0.0395	0.222	0.77	0.0958	0.314	2.07	2.78e-05	0.000175	100353177	100418425	+	21	4116	TTS	GHc-210E9.2	23562	Intergenic	0.009569	0.396736		Gain	Unchanged	Unchanged	Gain
RASA3-IT1	chr13	114860910	114867292	ENSG00000232487	6383	*	6.5	7.53	7.43	7.96	6.24	64	116.79	154.88	215.82	152.26	193.4	306.16	190.93	96.17	54.61	1.04	0.00681	0.0904	0.94	0.017	0.158	1.46	0.000236	0.0113	0.64	0.107	0.165	114873043	114874295	-	1	8942	TTS	RASA3	33985	intron	0.034634	0.606393	NM_001320821, intron 1 of 25	Gain	Unchanged	Gain	Unchanged
SIN3A	chr15	75741745	75749421	ENSG00000169375	7677	*	8.89	9.92	9.17	9.32	5.96	298	648.76	893.1	1045.41	459.97	693.08	717.51	563.15	79.34	45.15	1.03	0.00683	0.0906	0.28	0.494	0.707	0.44	0.272	0.535	3	2.55e-06	2.16e-05	75663273	75748124	-	20	2541	TSS	PTPN9	13878	intron	0.061107	0.591454	NM_001145357, intron 1 of 20	Gain	Unchanged	Unchanged	Gain
CTB-102L5.7	chr19	38652074	38667130	ENSG00000269653	15057	*	6.81	7.84	7.73	7.88	6.53	74	150.26	202.86	255.61	171.39	252.6	279.65	191.8	92.16	93.21	1.03	0.00687	0.0907	0.92	0.0242	0.182	1.07	0.00741	0.0807	0.68	0.0601	0.105	38675015	38676905	+	0	15413	TSS	SIPA1L3	39410	intron	0.019861	0.536597	NM_015073, intron 15 of 21	Gain	Unchanged	Gain	Unchanged
PDE8A	chr15	85523437	85526847	ENSG00000073417	3411	*	6.07	7.09	7.23	7.18	5.37	51	83.32	126.26	146.17	133.13	166.56	160.78	128.75	46.48	36.41	1.02	0.00687	0.0907	1.16	0.00286	0.0728	1.11	0.00407	0.0578	0.95	0.0185	0.0412	85523670	85682376	+	22	1472	TSS	SLC28A1	6266	promoter-TSS	0.086536	0.614663	NM_173454	Gain	Gain	Gain	Unchanged
RFX7	chr15	56521322	56526059	ENSG00000181827	4738	*	5.51	6.54	6.39	6.27	4.56	47	44.15	100.17	86.48	95.66	71.83	86.37	67.44	28.85	18.2	1.03	0.00694	0.0912	0.88	0.0298	0.198	0.75	0.0611	0.251	1.48	0.000764	0.003	56379665	56535483	-	9	11792	TSS	TEX9	12516	intron	0.008235	0.424741	NM_001370561, intron 4 of 11	Gain	Unchanged	Unchanged	Gain
FGF22	chr19	638458	645418	ENSG00000070388	6961	*	5.46	6.59	6.94	6.75	5.09	36	51.99	74.92	117.09	106.82	138.93	122.29	93.71	36.86	31.31	1.13	0.007	0.0918	1.48	0.000212	0.0208	1.3	0.0013	0.0298	0.76	0.0689	0.117	639894	643703	+	2	1765	TTS	AC004449.6	4401	intron	0.061503	0.672557	NM_001300812, intron 1 of 2	Gain	Gain	Gain	Unchanged
SCARNA10	chr12	6620020	6626133	ENSG00000239002	6114	*	5.46	6.75	6.96	7.37	5.55	21	66.94	113.64	101.02	120.37	128.67	173.6	156.77	54.49	39.32	1.29	0.00705	0.0924	1.5	0.00168	0.0557	1.91	3.56e-05	0.00352	0.76	0.0635	0.11	6619387	6619717	+	0	3360	TTS	NCAPD2	18044	intron	0.01538	0.471781	NM_014865, intron 6 of 31	Gain	Gain	Gain	Unchanged
CYS1	chr2	10196268	10202510	ENSG00000205795	6243	*	5.3	6.38	6.32	5.52	5.85	37	42.02	85.02	81.12	66.96	92.36	49.6	42.04	59.3	56.07	1.07	0.0071	0.0928	1.01	0.0159	0.154	0.21	0.638	0.818	0.29	0.446	0.517	10196906	10220538	-	2	2483	TTS	RP11-254F7.3	4396	intron	0.028361	0.563121	NM_001037160, intron 2 of 2	Gain	Unchanged	Unchanged	Unchanged
TAF1B	chr2	9997532	10004553	ENSG00000115750	7022	*	6.53	7.55	7.03	7.48	5.42	64	120.35	213.81	162.24	121.97	138.93	198.4	159.4	49.69	35.68	1.03	0.00715	0.093	0.5	0.212	0.469	0.96	0.0139	0.114	1.61	3.5e-05	0.000213	9983482	10074545	+	14	17560	TSS	RP11-95D17.1	75446	intron	0.011111	0.446375	NM_001318976, intron 6 of 14	Gain	Unchanged	Unchanged	Gain
NCS1	chr9	132952521	132963129	ENSG00000107130	10609	*	6.81	7.82	7.43	8.14	6.19	86	138.15	171.72	279.34	128.35	216.29	323.26	240.85	77.73	68.45	1.01	0.00714	0.093	0.62	0.12	0.363	1.33	0.000245	0.0116	0.99	0.00552	0.0155	132934856	132999583	+	7	22969	TSS	AL360004.1	51327	intron	0.023758	0.576357	NM_014286, intron 1 of 7	Gain	Unchanged	Gain	Unchanged
PVRL3-AS1	chr3	110687237	110689108	ENSG00000242242	1872	*	4.76	5.98	5.63	5.39	3	23	31.33	63.13	62.76	46.24	52.89	38.48	45.54	8.01	8.01	1.21	0.00713	0.093	0.87	0.0716	0.286	0.63	0.209	0.468	2.35	2.6e-05	0.000165	110612554	110790371	-	3	75618	TTS	RP11-553A10.1	76114	Intergenic	0.01123	0.45163		Gain	Unchanged	Unchanged	Gain
CSNK1E	chr22	38792731	38795902	ENSG00000213923	3172	*	5.85	6.93	6.37	6.27	4.87	40	75.49	117.85	125.51	70.15	95.52	95.78	58.68	33.66	24.76	1.08	0.00716	0.0931	0.52	0.238	0.497	0.42	0.357	0.617	1.19	0.00665	0.018	38687372	38794527	-	14	210	TSS	RP3-449O17.1	604	intron	0.073817	0.599495	NR_002821, intron 1 of 4	Gain	Unchanged	Unchanged	Gain
PSMA7	chr20	60709473	60725761	ENSG00000101182	16289	*	9.69	10.7	10.48	10.52	7.28	569	1083.87	1569.03	1757.14	1378.33	1476.94	1464.09	1482.76	186.72	123.79	1.01	0.00717	0.0931	0.79	0.0464	0.237	0.83	0.03	0.172	2.55	2.45e-11	7.17e-10	60711790	60718486	-	6	869	TSS	SS18L1	1204	intron	0.037208	0.547213	NM_002792, intron 1 of 6	Gain	Unchanged	Unchanged	Gain
RP11-133K1.2	chr15	40528773	40533302	ENSG00000259288	4530	*	5.25	6.41	6.92	6.18	4.97	26	49.85	82.49	88.01	99.65	142.09	82.95	62.18	41.67	21.12	1.17	0.00723	0.0933	1.67	0.000121	0.0153	0.94	0.0416	0.204	0.66	0.154	0.221	40509649	40568597	+	10	21388	TSS	PAK6	21410	promoter-TSS	0.021201	0.530802	NM_001276718	Gain	Gain	Unchanged	Unchanged
GNAZ	chr22	23435037	23439639	ENSG00000128266	4603	*	5.22	6.46	6.41	7.26	5.75	21	53.41	90.91	85.71	64.57	104.99	169.33	137.5	67.32	40.05	1.25	0.00723	0.0933	1.19	0.0164	0.156	2.04	3.65e-06	0.000801	0.27	0.513	0.579	23412539	23467224	+	2	24799	TSS	RTDR1	35746	intron	0.029341	0.60452	NM_002073, intron 1 of 2	Gain	Unchanged	Gain	Unchanged
WNT6	chr2	219715285	219719137	ENSG00000115596	3853	*	5	6.22	5.87	6.22	4.45	22	42.02	69.87	78.83	55.8	61.57	93.22	56.05	24.84	18.93	1.22	0.00729	0.0938	0.87	0.0688	0.281	1.22	0.0108	0.099	0.96	0.0424	0.0795	219724543	219738955	+	3	7332	TSS	AC009974.11	10423	Intergenic	0.01584	0.497144		Gain	Unchanged	Gain	Unchanged
RP11-131L23.1	chr1	85741395	85745961	ENSG00000223653	4567	*	6.81	7.87	6.79	6.64	4.91	67	157.38	229.8	238.78	94.86	126.3	110.32	89.33	27.25	32.77	1.06	0.00735	0.094	-0.02	0.946	0.974	-0.17	0.679	0.844	2.14	5.96e-07	6e-06	85743354	85913807	+	4	324	TSS	BCL10	905	TTS	0.030011	0.495182	NR_045484	Gain	Unchanged	Unchanged	Gain
PRR5L	chr11	36475131	36478465	ENSG00000135362	3335	*	5.39	6.47	5.81	5.72	4.58	35	49.14	94.28	83.42	53.41	58.41	67.56	37.66	28.85	18.93	1.08	0.00745	0.0945	0.41	0.357	0.602	0.32	0.499	0.729	1.26	0.00452	0.0132	36317837	36485194	+	9	8396	TTS	RP11-219O3.2	29126	intron	0.019502	0.556389	NM_024841, intron 9 of 9	Gain	Unchanged	Unchanged	Gain
H2AFV	chr7	44880435	44883059	ENSG00000105968	2625	*	5.23	6.33	5.09	5.49	3.89	36	39.17	69.02	91.84	29.5	38.68	55.59	34.16	13.62	16.02	1.1	0.00745	0.0945	-0.14	0.767	0.88	0.26	0.589	0.788	1.87	7.85e-05	0.000429	44866389	44887676	-	4	5929	TSS	AC004854.4	6267	intron	0.010675	0.412729	NM_201436, intron 1 of 3	Gain	Unchanged	Unchanged	Gain
SNIP1	chr1	38017911	38021266	ENSG00000163877	3356	*	5.42	6.47	5.22	5.44	4.22	40	45.58	93.43	83.42	31.89	42.63	56.44	30.65	18.43	18.93	1.05	0.00748	0.0947	-0.2	0.662	0.818	0.03	0.961	0.984	1.61	0.000327	0.00146	38000049	38019903	-	3	314	TSS	RP3-423B22.5	2254	intron	0.026535	0.467064	NM_024700, intron 1 of 3	Gain	Unchanged	Unchanged	Gain
ESPNP	chr1	17025503	17029753	ENSG00000268869	4251	*	5.18	6.47	6.58	6.67	5.73	20	52.7	70.71	107.14	85.3	106.57	117.16	86.71	51.29	54.61	1.29	0.00751	0.095	1.4	0.00324	0.0782	1.49	0.00162	0.0337	0.22	0.571	0.632	17017712	17046652	-	10	9916	TTS	EIF1AXP1	15078	intron	0.056719	0.679294	NR_026567, intron 6 of 10	Gain	Gain	Gain	Unchanged
RBM10	chrX	47037214	47042488	ENSG00000182872	5275	*	5.78	6.82	6.58	6.86	4.52	42	67.65	106.9	118.62	83.7	107.36	131.7	100.72	23.24	22.57	1.04	0.00754	0.095	0.8	0.0527	0.25	1.08	0.00689	0.0776	1.66	0.000112	0.000585	47004267	47046210	+	23	6359	TTS	UBA1	10408	exon	0.021809	0.568639	NM_152856, exon 11 of 23	Gain	Unchanged	Gain	Gain
AP003025.2	chr11	131379520	131383456	ENSG00000237654	3937	*	5.51	6.59	6.34	6.04	4.01	36	54.83	83.33	109.44	94.86	67.1	64.14	67.44	16.83	15.29	1.09	0.00761	0.0953	0.83	0.0528	0.25	0.53	0.215	0.476	1.74	0.000244	0.00114	131372652	131410510	-	7	8836	TTS	NTM	141116	intron	0.01474	0.507622	NM_001048209, intron 1 of 7	Gain	Unchanged	Unchanged	Gain
CWC25	chr17	36977750	36981529	ENSG00000108296	3780	*	5.28	6.41	4.6	5.55	4.45	30	47.71	95.12	75	19.13	29.21	48.75	44.67	24.04	19.66	1.13	0.00758	0.0953	-0.68	0.191	0.446	0.27	0.582	0.784	1.36	0.00226	0.00743	36956686	36981734	-	10	2094	TSS	MIR4727	2450	intron	0.025146	0.504366	NM_017748, intron 1 of 9	Gain	Unchanged	Unchanged	Gain
CIZ1	chr9	130964691	130969185	ENSG00000148337	4495	*	6.11	7.17	6.9	6.98	4.65	46	92.58	137.21	151.53	106.03	132.62	137.69	115.61	32.86	17.48	1.06	0.00762	0.0953	0.78	0.0621	0.269	0.87	0.0347	0.185	1.69	0.00024	0.00112	130928343	130966662	-	17	276	TSS	DNM1	1281	promoter-TSS	0.039172	0.593903	NM_001131015	Gain	Unchanged	Unchanged	Gain
ZDHHC18	chr1	27178579	27185060	ENSG00000204160	6482	*	6.62	7.66	7.59	7.67	5.57	63	133.88	180.14	225.77	163.42	222.61	213.8	193.56	54.49	40.78	1.04	0.00774	0.0959	0.97	0.0182	0.162	1.05	0.00816	0.0851	1.43	0.000313	0.0014	27153200	27184092	+	7	2272	TTS	SFN	7812	3' UTR	0.014506	0.550841	NM_032283, exon 8 of 8	Gain	Unchanged	Gain	Gain
STEAP3	chr2	119980481	119984503	ENSG00000115107	4023	*	6.46	7.5	7.58	7.14	5.31	57	118.93	168.35	193.62	182.55	199.71	157.36	125.24	42.47	37.14	1.04	0.00774	0.0959	1.12	0.00518	0.0969	0.68	0.0967	0.316	1.54	0.000121	0.000625	119981383	120023228	+	5	1109	TSS	STEAP3-AS1	19505	intron	0.036309	0.593983	NM_138637, intron 1 of 5	Gain	Gain	Unchanged	Gain
ETV3	chr1	157106913	157109111	ENSG00000117036	2199	*	5.55	6.58	6.17	5.95	3.86	42	51.99	96.8	94.13	66.17	78.15	66.7	56.93	14.42	14.56	1.02	0.0078	0.0963	0.62	0.134	0.383	0.4	0.348	0.609	2.08	6.93e-06	5.18e-05	157090982	157108159	-	4	147	TSS	CYCSP52	9549	intron	0.059172	0.596906	NM_001145312, intron 1 of 4	Gain	Unchanged	Unchanged	Gain
TAF15	chr17	34170782	34173569	ENSG00000172660	2788	*	5.38	6.45	5.25	6.23	4.14	37	46.29	97.64	77.3	29.5	46.57	78.68	70.94	19.23	16.02	1.07	0.00782	0.0965	-0.13	0.776	0.885	0.85	0.0404	0.201	1.62	0.000405	0.00175	34136458	34174246	+	18	2070	TTS	C17orf66	9778	intron	0.019383	0.458199	NM_139215, intron 15 of 15	Gain	Unchanged	Unchanged	Gain
TGM2	chr20	36759782	36765425	ENSG00000198959	5644	*	5.68	6.7	7.27	6.92	5.18	42	60.53	106.06	102.55	136.32	172.09	140.25	102.47	36.86	35.68	1.02	0.00783	0.0965	1.59	3.46e-05	0.00762	1.24	0.00165	0.034	1.05	0.00822	0.0215	36756862	36793774	-	12	5742	TTS	RN7SL237P	35502	intron	0.019497	0.549708	NM_001323317, intron 9 of 11	Gain	Gain	Gain	Gain
CSRP1	chr1	201460848	201463911	ENSG00000159176	3064	*	5.34	6.39	5.09	6.32	4.08	38	42.73	90.07	78.06	34.28	33.94	88.08	71.82	12.02	21.85	1.06	0.00788	0.0969	-0.24	0.6	0.78	0.99	0.0157	0.122	1.59	0.00105	0.00394	201452657	201478584	-	6	9722	TTS	RP11-134G8.7	13988	intron	0.010777	0.534117	NM_004078, intron 2 of 5	Gain	Unchanged	Unchanged	Gain
PALD1	chr10	72233645	72239663	ENSG00000107719	6019	*	6.75	7.8	7.36	7.49	5.86	67	148.12	192.76	253.32	127.55	202.08	189	169.91	60.1	56.07	1.05	0.00798	0.0973	0.62	0.154	0.407	0.74	0.0686	0.267	1.14	0.00384	0.0115	72238576	72328205	+	19	1922	TSS	YY1P1	8437	Intergenic	0.033405	0.57112		Gain	Unchanged	Unchanged	Gain
DHX8	chr17	41559264	41562961	ENSG00000067596	3698	*	5.66	6.78	6.11	5.59	4.79	34	66.94	91.75	128.57	52.61	85.25	64.99	31.53	30.45	24.76	1.13	0.00794	0.0973	0.45	0.343	0.592	-0.06	0.881	0.947	1.19	0.00656	0.0178	41561330	41604154	+	22	218	TSS	AC087650.1	7080	promoter-TSS	0.029491	0.494455	NM_001322218	Gain	Unchanged	Unchanged	Gain
STIL	chr1	47776193	47780388	ENSG00000123473	4196	*	5.74	6.75	5.42	5.28	4.41	47	59.82	120.37	94.9	46.24	39.47	42.76	35.03	19.23	23.3	1.01	0.00796	0.0973	-0.32	0.458	0.681	-0.46	0.295	0.556	1.59	0.000273	0.00125	47715810	47779819	-	17	1528	TSS	CMPK1	21178	intron	0.028374	0.463886	NM_003035, intron 1 of 16	Gain	Unchanged	Unchanged	Gain
TNIP1	chr5	150455043	150458475	ENSG00000145901	3433	*	5.73	6.75	6.65	6.16	4.73	43	63.38	106.06	109.44	91.68	108.94	78.68	63.93	30.45	22.57	1.02	0.00798	0.0973	0.92	0.0223	0.176	0.42	0.315	0.577	1.45	0.000602	0.00245	150409509	150466719	-	17	9960	TSS	ANXA6	23906	intron	0.012241	0.504953	NM_001252390, intron 1 of 17	Gain	Unchanged	Unchanged	Gain
SNRNP25	chr16	106287	110149	ENSG00000161981	3863	*	5.26	6.35	6.31	6.56	4.32	38	38.46	67.34	95.66	72.54	86.04	101.77	87.58	23.24	16.75	1.09	0.00793	0.0973	1.05	0.0104	0.127	1.31	0.000965	0.0255	1.3	0.00489	0.0141	103009	107669	+	5	549	TTS	RHBDF1	2812	TTS	0.024087	0.572242	NM_024571	Gain	Unchanged	Gain	Gain
MYC	chr8	128819291	128822749	ENSG00000136997	3459	*	5.4	6.44	5.97	6.92	4.86	38	46.29	88.38	85.71	62.98	62.36	143.67	98.09	38.47	19.66	1.05	0.00798	0.0973	0.57	0.178	0.434	1.52	0.000136	0.00807	1.31	0.00267	0.00852	128748329	128753674	+	2	67346	TTS	CASC11	74807	intron	0.014174	0.481203	NR_003367, intron 1 of 8	Gain	Unchanged	Gain	Gain
PLOD1	chr1	12002459	12006654	ENSG00000083444	4196	*	5.25	6.36	6.05	6.6	5.04	30	46.29	85.02	79.59	66.17	66.31	107.75	85.83	28.85	37.14	1.11	0.00798	0.0973	0.8	0.0714	0.286	1.34	0.00128	0.0297	0.65	0.131	0.194	11994809	12035594	+	19	9748	TSS	KIAA2013	18076	intron	0.014783	0.536353	NM_000302, intron 1 of 18	Gain	Unchanged	Gain	Unchanged
PRMT5-AS1	chr14	23391462	23394512	ENSG00000237054	3051	*	5.01	6.3	4.99	5.54	3.79	24	40.59	106.06	51.28	37.47	26.05	57.3	35.91	16.03	11.65	1.28	0.00803	0.0976	-0.02	0.944	0.973	0.53	0.298	0.56	1.57	0.00212	0.00705	23390119	23396039	+	3	2868	TSS	PRMT5	3268	TTS	0.011151	0.479344	NR_120599	Gain	Unchanged	Unchanged	Gain
POU3F1	chr1	38499642	38505806	ENSG00000185668	6165	*	5.49	6.68	6.29	6.86	5.22	26	64.09	102.69	101.79	64.57	91.57	126.57	105.97	49.69	24.76	1.18	0.00807	0.0979	0.79	0.101	0.336	1.37	0.00224	0.0411	0.76	0.0955	0.152	38509522	38512450	-	0	6798	TTS	RP5-884C9.2	10372	Intergenic	0.012818	0.515899		Gain	Unchanged	Gain	Unchanged
ANKRD11	chr16	89553496	89557594	ENSG00000167522	4099	*	6.57	7.69	6.68	6.4	5.28	50	139.58	210.44	203.57	77.33	127.88	82.95	85.83	48.08	29.86	1.13	0.00814	0.0986	0.11	0.824	0.911	-0.17	0.696	0.852	1.51	0.000829	0.00322	89334037	89556969	-	13	1424	TSS	RP11-104N10.1	2879	intron	0.066634	0.575891	NM_001256182, intron 1 of 13	Gain	Unchanged	Unchanged	Gain
DDX47	chr12	12967439	12972273	ENSG00000213782	4835	*	5.81	6.86	6	6.42	4.56	50	61.96	146.47	86.48	52.61	74.99	102.62	69.19	21.64	25.49	1.06	0.00816	0.0986	0.19	0.659	0.816	0.62	0.127	0.365	1.92	2.84e-06	2.37e-05	12966249	12982913	+	11	3607	TSS	APOLD1	13053	intron	0.010139	0.402565	NM_016355, intron 2 of 11	Gain	Unchanged	Unchanged	Gain
RPL21P116	chr15	79164598	79166716	ENSG00000243711	2119	*	6.34	7.35	6.25	6.55	3.8	57	104.68	177.61	147.7	56.6	95.52	101.77	85.83	17.63	10.19	1.01	0.00819	0.0989	-0.09	0.826	0.912	0.21	0.611	0.802	2.72	9.61e-09	1.53e-07	79155588	79156071	-	0	9586	TSS	MORF4L1	24415	intron	0.067548	0.557602	NM_001265604, intron 1 of 11	Gain	Unchanged	Unchanged	Gain
MAPKAPK2	chr1	206857731	206860133	ENSG00000162889	2403	*	5.31	6.49	5.77	5.45	3.86	26	53.41	75.76	104.08	51.82	57.63	46.18	41.16	16.03	13.11	1.18	0.00821	0.0991	0.46	0.344	0.592	0.14	0.802	0.909	1.76	0.000418	0.00179	206858381	206907628	+	9	551	TSS	DYRK3	1168	intron	0.077884	0.644463	NM_032960, intron 1 of 9	Gain	Unchanged	Unchanged	Gain
SERBP1P3	chr3	53105212	53109209	ENSG00000242142	3998	*	5.06	6.31	6.32	5.92	4.69	19	47.71	77.44	81.12	69.35	90.78	64.14	56.93	32.86	18.93	1.25	0.00836	0.0994	1.26	0.00946	0.122	0.86	0.0877	0.302	1.09	0.0189	0.0418	53098298	53099107	-	0	8104	TSS	RP11-894J14.5	26258	Intergenic	0.019019	0.590193		Gain	Unchanged	Unchanged	Gain
KIAA1755	chr20	36847859	36851604	ENSG00000149633	3746	*	5.71	6.72	6.26	6.21	4.98	45	59.82	114.48	96.43	58.19	94.73	79.53	68.31	37.66	25.49	1.01	0.00827	0.0994	0.54	0.205	0.462	0.5	0.224	0.484	1.16	0.00526	0.0149	36838889	36889174	-	13	10842	TTS	BPI	38818	intron	0.016293	0.54713	NM_001029864, intron 10 of 13	Gain	Unchanged	Unchanged	Gain
RP11-54O7.3	chr1	837104	871378	ENSG00000223764	34275	*	9.75	10.87	10.71	11.15	7.56	500	1219.89	1606.91	2129.08	1418.98	1937.15	2468.94	2087.95	220.38	155.83	1.12	0.00831	0.0994	0.96	0.0312	0.202	1.41	0.00128	0.0297	2.31	1.71e-08	2.54e-07	852244	856396	-	3	1997	TTS	RP11-54O7.16	2885	non-coding	0.045984	0.63217	NR_026874, exon 2 of 4	Gain	Unchanged	Gain	Gain
RP11-96D1.7	chr16	68291407	68297175	ENSG00000260441	5769	*	5.09	6.3	6.6	6.94	5.25	21	47	77.44	80.36	83.7	110.51	111.17	134.88	37.66	38.59	1.21	0.00838	0.0994	1.51	0.00102	0.0462	1.86	2.41e-05	0.00278	0.6	0.149	0.215	68290064	68294346	-	2	55	TSS	PLA2G15	670	3' UTR	0.015259	0.554265	NM_012320, exon 6 of 6	Gain	Gain	Gain	Unchanged
RP6-99M1.1	chrX	45570614	45573640	ENSG00000204915	3027	*	5.02	6.13	6.91	6.83	4.17	30	34.89	72.39	68.11	150.67	89.99	106.9	120.86	18.43	17.48	1.11	0.00841	0.0997	1.89	8.67e-06	0.00373	1.81	4.84e-06	0.000978	1.45	0.00185	0.00629	45590240	45591177	+	0	18113	TSS	RP6-99M1.2	32511	Intergenic	0.004298	0.419696		Gain	Gain	Gain	Gain
LANCL2	chr7	55431842	55435663	ENSG00000132434	3822	*	6.03	7.07	6.89	7.2	5.14	52	79.05	162.46	105.61	114.79	122.35	120.58	173.41	36.06	34.22	1.03	0.00842	0.0997	0.86	0.0265	0.189	1.17	0.00271	0.0457	1.25	0.00162	0.00562	55433140	55501435	+	9	612	TSS	RP11-775L16.1	21102	exon	0.053141	0.524993	NM_018697, exon 1 of 9	Gain	Unchanged	Gain	Gain
LRFN4	chr11	66623272	66633040	ENSG00000173621	9769	*	8.78	9.85	9.77	10	6.57	246	632.38	859.43	987.24	697.53	1050.67	1192.14	855.67	123.41	66.26	1.07	0.00847	0.0999	0.99	0.0246	0.183	1.22	0.00455	0.0621	2.28	0.00177	0.00606	66624588	66627946	+	2	210	TTS	PC	12161	TTS	0.055493	0.661855	NM_024036	Gain	Unchanged	Gain	Gain
EIF4A3	chr17	78118636	78121305	ENSG00000141543	2670	*	4.74	6.06	4.87	5.23	4.92	15	38.46	74.07	59.69	20.73	37.89	45.33	29.78	35.26	25.49	1.32	0.00846	0.0999	0.13	0.849	0.924	0.49	0.403	0.654	0.5	0.272	0.347	78109012	78120982	-	11	1012	TSS	CARD14	23840	intron	0.052849	0.550393	NM_014740, intron 1 of 11	Gain	Unchanged	Unchanged	Unchanged
CTB-49A3.5	chr5	132576628	132581486	ENSG00000249478	4859	*	7.37	3.6	4.86	6.22	5.23	152	178.75	13.47	10.71	33.48	24.47	71.84	77.07	38.47	36.41	-3.77	2.8e-18	3.46e-14	-2.51	1.27e-10	2.57e-06	-1.15	0.000908	0.0247	2.39	1.8e-11	5.5e-10	132579642	132584473	+	1	585	TSS	FSTL4	46911	intron	0.010706	0.506175	NM_015082, intron 7 of 15	Loss	Loss	Loss	Gain
AC013275.2	chr2	120242551	120249188	ENSG00000231013	6638	*	7.49	3.88	7.03	6.39	5.96	110	249.96	13.47	16.07	119.58	142.09	102.62	65.69	62.51	61.89	-3.61	3.01e-14	1.86e-10	-0.46	0.258	0.517	-1.1	0.0105	0.0975	1.76	6.66e-06	5.01e-05	120234023	120244922	+	2	948	TTS	SCTR	36200	TTS	0.015973	0.527949	NR_147846	Loss	Unchanged	Loss	Gain
GPIHBP1	chr8	144298006	144302075	ENSG00000182851	4070	*	7.41	4.08	5.97	6.47	5.79	119	220.05	18.52	15.31	52.61	72.62	94.93	82.33	61.71	48.79	-3.33	6.02e-14	2.48e-10	-1.44	0.000389	0.0284	-0.94	0.0151	0.119	1.83	1.24e-06	1.14e-05	144295067	144299044	+	3	996	TTS	ZFP41	29238	TTS	0.018437	0.602851	NM_001301772	Loss	Loss	Unchanged	Gain
GPIHBP1	chr8	144283779	144297512	ENSG00000182851	13734	*	8.55	6.11	7.51	9.06	7.56	269	481.4	48.82	89.54	179.37	186.3	630.28	434.41	220.38	155.83	-2.44	5.95e-10	1.05e-06	-1.04	0.00452	0.09	0.5	0.179	0.435	1.26	0.000394	0.00171	144295067	144299044	+	3	4422	TSS	ZFP41	38634	Intergenic	0.030149	0.615962		Loss	Loss	Unchanged	Gain
PLK5	chr19	1526214	1534276	ENSG00000185988	8063	*	7.61	5.36	6.24	7.58	5.5	171	218.63	36.2	45.92	64.57	86.83	238.6	144.51	49.69	40.78	-2.25	5.49e-10	1.05e-06	-1.36	0.000148	0.0172	-0.02	0.942	0.974	2.2	5.62e-10	1.19e-08	1524072	1535455	+	13	5210	TTS	ADAMTSL5	17057	intron	0.033743	0.601092	NM_001243079, intron 11 of 13	Loss	Loss	Unchanged	Gain
MRPL45P1	chr2	88646558	88650254	ENSG00000232508	3697	*	6.43	3.61	6.51	6.15	4.61	76	96.14	16.84	7.65	105.23	77.36	74.4	67.44	23.24	25.49	-2.81	1.36e-08	1.56e-05	0.09	0.832	0.915	-0.28	0.453	0.694	2.17	4.78e-08	6.35e-07	88664213	88665127	-	0	15807	TTS	RNU6-568P	18905	Intergenic	0.021922	0.517316		Loss	Unchanged	Unchanged	Gain
THRB	chr3	24275744	24281222	ENSG00000151090	5479	*	6.93	4.72	6.05	6.17	4.94	103	141.72	26.09	26.79	82.11	50.52	68.42	75.32	28.05	33.5	-2.21	4.08e-08	3.88e-05	-0.88	0.0256	0.186	-0.77	0.0364	0.19	2.22	6.81e-09	1.12e-07	24158650	24536266	-	11	119833	TTS	LINC00691	133769	intron	0.005112	0.432457	NM_001354709, intron 3 of 10	Loss	Unchanged	Unchanged	Gain
LRRC20	chr10	72140355	72142697	ENSG00000172731	2343	*	7.49	5.45	7.31	6.75	4.47	153	207.23	33.67	53.57	156.25	161.82	94.07	121.74	29.65	14.56	-2.05	7.66e-08	5.57e-05	-0.18	0.591	0.774	-0.74	0.0351	0.187	3.11	6.94e-14	3.64e-12	72058731	72142382	-	4	856	TSS	CEP57L1P1	7655	promoter-TSS	0.055959	0.608881	NM_207119	Loss	Unchanged	Unchanged	Gain
PSG8	chr19	43265465	43267922	ENSG00000124467	2458	*	6.75	4.69	5.25	5.8	2.79	88	126.76	27.78	23.72	29.5	46.57	69.27	42.04	8.01	5.83	-2.06	7.43e-07	0.000357	-1.5	0.000365	0.0274	-0.95	0.0199	0.139	4	3.8e-15	2.82e-13	43256878	43359843	-	5	9816	TTS	CEACAMP6	18664	intron	0.004886	0.485958	NM_001130168, intron 1 of 4	Loss	Loss	Unchanged	Gain
RP11-396B14.2	chr16	11312634	11320477	ENSG00000263033	7844	*	7.64	5.58	7.17	7.03	5.85	126	272.04	53.03	42.86	127.55	160.25	152.22	109.48	64.91	50.24	-2.05	6.55e-07	0.000357	-0.47	0.242	0.501	-0.6	0.134	0.374	1.96	7.15e-07	7.06e-06	11290033	11318373	+	2	1818	TTS	HNRNPCP4	19954	Intergenic	0.017598	0.511029		Loss	Unchanged	Unchanged	Gain
RP11-467L13.5	chr12	31902007	31909120	ENSG00000223722	7114	*	8.59	7.05	7.92	8.39	5.63	340	432.98	130.47	134.69	259.88	225.76	362.6	310.04	61.71	37.14	-1.54	6.95e-07	0.000357	-0.67	0.0403	0.224	-0.2	0.529	0.749	3.09	8.23e-18	1.13e-15	31907650	31908055	+	0	2086	TSS	RP11-467L13.4	4390	Intergenic	0.01167	0.423309		Loss	Unchanged	Unchanged	Gain
GPNMB	chr7	23286672	23288383	ENSG00000136235	1712	*	6.4	4.09	6.55	6.01	3.29	76	93.29	12.63	21.43	89.28	97.88	69.27	59.56	6.41	13.11	-2.31	6.07e-07	0.000357	0.14	0.702	0.842	-0.39	0.298	0.56	3.22	3.81e-11	1.06e-09	23286181	23314727	+	10	1346	TSS	AC005082.12	39864	intron	0.038596	0.557569	NM_001005340, intron 1 of 10	Loss	Unchanged	Unchanged	Gain
CTD-2005H7.2	chr11	86451691	86454972	ENSG00000255250	3282	*	8.19	6.61	7.35	7.73	4.17	256	329.01	93.43	101.79	168.21	157.88	180.45	243.48	18.43	17.48	-1.58	8.78e-07	0.000403	-0.84	0.0105	0.127	-0.46	0.164	0.416	4.07	4.73e-26	4.71e-23	86438396	86476307	+	4	14936	TSS	CTD-2005H7.1	28198	Intergenic	0.006707	0.465712		Loss	Unchanged	Unchanged	Gain
RP13-616I3.1	chr3	197216615	197219919	ENSG00000272989	3305	*	6.35	4.04	4.62	5.18	4.33	61	101.84	16.84	16.07	24.71	24.47	42.76	29.78	26.45	13.84	-2.31	1.2e-06	0.000495	-1.73	0.000144	0.0169	-1.17	0.00808	0.0846	2.22	8.08e-07	7.86e-06	197232132	197233857	-	0	13865	TTS	AC128709.1	13867	Intergenic	0.016652	0.489407		Loss	Loss	Loss	Gain
CEACAMP6	chr19	43269521	43274989	ENSG00000238092	5469	*	7.39	5.6	6.88	7.26	4.55	116	218.63	45.45	51.28	110.81	125.51	177.88	128.75	26.45	20.39	-1.79	6.57e-06	0.00182	-0.5	0.189	0.446	-0.13	0.735	0.874	3	4.51e-13	1.97e-11	43285357	43290747	-	2	13102	TTS	PSG8	15377	Intergenic	0.010243	0.482078		Loss	Unchanged	Unchanged	Gain
NOV	chr8	120428016	120430420	ENSG00000136999	2405	*	6.35	4.32	5.58	5.27	5.12	64	98.99	19.36	20.66	42.25	53.68	33.35	43.79	35.26	34.22	-2.03	8.53e-06	0.0022	-0.76	0.0657	0.276	-1.08	0.0113	0.102	1.56	6.71e-05	0.000375	120428545	120436593	+	4	673	TSS	RP11-775B15.2	2931	intron	0.032876	0.536606	NM_002514, intron 2 of 4	Loss	Unchanged	Unchanged	Gain
IGLC7	chr22	23290538	23296584	ENSG00000211685	6047	*	6.65	4.53	6.43	6.36	5.64	60	141	27.78	18.37	77.33	94.73	98.35	65.69	60.9	38.59	-2.12	1.2e-05	0.00285	-0.22	0.593	0.775	-0.29	0.497	0.727	1.29	0.00233	0.00762	23264765	23265203	+	0	28358	TTS	IGLJ7	29954	Intergenic	0.008933	0.497684		Loss	Unchanged	Unchanged	Gain
AC093106.7	chr7	131312946	131315514	ENSG00000213261	2569	*	7.01	5.26	5.78	5.63	3.75	96	162.37	33.67	42.86	55.01	55.26	45.33	53.42	15.23	11.65	-1.76	1.54e-05	0.00334	-1.23	0.00193	0.0604	-1.39	0.000527	0.0183	3.32	1.84e-13	8.82e-12	131346710	131347383	-	0	32480	TTS	AC093106.4	36035	Intergenic	0.01753	0.553349		Loss	Loss	Loss	Gain
LINC00856	chr10	80210171	80213292	ENSG00000230417	3122	*	6.58	4.9	4.89	6.15	4.88	85	106.11	32.83	26.79	25.51	33.94	76.11	65.69	32.06	26.94	-1.68	3.76e-05	0.00655	-1.68	5.8e-05	0.0102	-0.43	0.246	0.508	1.82	3.43e-06	2.81e-05	80288507	80434724	+	3	76776	TSS	RP11-90J7.4	95874	Intergenic	0.010256	0.519705		Loss	Loss	Unchanged	Gain
TMEM45B	chr11	129719246	129722143	ENSG00000151715	2898	*	6.58	4.76	5.51	6.28	3.31	73	118.93	33.67	20.66	47.03	44.21	88.94	66.56	10.42	9.47	-1.82	4.01e-05	0.00677	-1.07	0.00903	0.121	-0.3	0.435	0.68	3.33	4.6e-12	1.63e-10	129685713	129729898	+	5	9204	TTS	NFRKB	12836	intron	0.017265	0.461512	NM_001331211, intron 2 of 6	Loss	Unchanged	Unchanged	Gain
LINC00856	chr10	80213495	80218553	ENSG00000230417	5059	*	7.08	5.43	5.89	6.98	5.36	96	175.19	46.3	39.8	48.63	70.26	129.13	123.49	44.88	37.14	-1.66	4.29e-05	0.0069	-1.19	0.00397	0.0853	-0.1	0.774	0.895	1.99	2.5e-07	2.77e-06	80288507	80434724	+	3	72483	TSS	RP11-90J7.4	100167	Intergenic	0.012853	0.498616		Loss	Loss	Unchanged	Gain
RP11-463P17.1	chr10	48319446	48325989	ENSG00000226044	6544	*	7.34	5.93	7.17	7.87	5.99	146	178.03	58.92	62.76	121.97	166.56	289.05	178.67	73.73	53.16	-1.41	4.71e-05	0.0072	-0.17	0.628	0.797	0.53	0.138	0.381	1.63	3.57e-06	2.9e-05	48324787	48332197	-	3	2070	TTS	ZNF488	32306	Intergenic	0.011006	0.570381		Loss	Unchanged	Unchanged	Gain
AL121819.1	chr14	59216608	59220815	ENSG00000221427	4208	*	8.1	6.75	7.65	7.36	5.17	225	322.6	115.32	100.26	209.66	191.82	150.51	177.79	37.66	34.22	-1.34	5.25e-05	0.00773	-0.45	0.185	0.441	-0.74	0.0291	0.169	3.07	1.24e-17	1.61e-15	59237869	59237964	-	0	19158	TTS	RP11-112J1.1	42660	Intergenic	0.011412	0.48039		Loss	Unchanged	Unchanged	Gain
AC093106.7	chr7	131319976	131326706	ENSG00000213261	6731	*	6.98	5.44	6.52	7.15	4.92	93	159.52	38.72	48.21	90.88	92.36	147.09	137.5	24.84	35.68	-1.54	0.000133	0.0144	-0.46	0.223	0.481	0.17	0.654	0.829	2.25	2.83e-08	3.98e-07	131346710	131347383	-	0	23369	TTS	AC093106.4	26924	Intergenic	0.016347	0.524517		Loss	Unchanged	Unchanged	Gain
RP5-1172A22.1	chr22	27618915	27623341	ENSG00000233521	4427	*	7.75	6.47	7.54	6.5	5.66	195	236.43	75.76	101.02	206.47	165.77	100.91	80.58	48.08	53.16	-1.29	0.000133	0.0144	-0.21	0.521	0.724	-1.25	0.000259	0.012	2.32	1.03e-11	3.33e-10	27617309	27620688	-	2	440	TSS	CTA-503F6.2	20040	promoter-TSS	0.009944	0.450972	NM_001350812	Loss	Unchanged	Loss	Gain
RP11-396B14.2	chr16	11300738	11306574	ENSG00000263033	5837	*	7.01	5.63	6.68	6.7	5.5	133	123.91	48.82	50.51	90.08	114.46	112.03	96.34	41.67	48.79	-1.37	0.000141	0.0148	-0.33	0.353	0.599	-0.3	0.383	0.636	1.77	8.82e-07	8.49e-06	11290033	11318373	+	2	13623	TSS	CLEC16A	27610	Intergenic	0.015596	0.552947		Loss	Unchanged	Unchanged	Gain
DHRS2	chr14	24129047	24134978	ENSG00000100867	5932	*	7.2	5.77	5.8	6.43	4.98	114	180.17	57.24	52.04	56.6	54.47	98.35	74.44	30.45	32.77	-1.43	0.000143	0.0148	-1.41	0.000261	0.0232	-0.77	0.0412	0.203	2.42	2.9e-10	6.56e-09	24099323	24113752	+	8	18260	TTS	RP11-388E23.2	66234	Intergenic	0.008263	0.468218		Loss	Loss	Unchanged	Gain
MIR5702	chr2	227523629	227529030	ENSG00000263363	5402	*	7.15	5.84	7.53	6.8	5.08	134	150.97	61.45	52.81	210.46	158.67	98.35	125.24	39.27	28.4	-1.32	0.000185	0.0171	0.37	0.277	0.533	-0.35	0.309	0.572	2.26	1.32e-09	2.55e-08	227523425	227523509	-	0	2820	TSS	IRS1	69702	Intergenic	0.011111	0.45399		Loss	Unchanged	Unchanged	Gain
RP11-231C14.6	chr16	29299048	29303398	ENSG00000260413	4351	*	6.72	5.21	6.47	6.84	4.82	81	129.61	37.88	35.97	67.76	109.72	135.12	94.59	38.47	18.2	-1.51	0.000199	0.0178	-0.25	0.535	0.734	0.13	0.757	0.888	1.97	8.65e-06	6.28e-05	29323670	29342598	+	4	22447	TSS	SNX29P2	38395	Intergenic	0.028512	0.615862		Loss	Unchanged	Unchanged	Gain
RP11-116D17.1	chr12	115770463	115773925	ENSG00000257726	3463	*	6.48	4.93	6.54	6.82	3.78	90	88.3	37.88	22.96	115.59	71.04	116.31	110.35	12.82	14.56	-1.55	0.000231	0.0197	0.07	0.865	0.932	0.35	0.323	0.585	2.88	4.05e-11	1.12e-09	115800816	115802550	+	1	28622	TSS	RP11-116D17.3	33681	Intergenic	0.00809	0.461294		Loss	Unchanged	Unchanged	Gain
PLAC8	chr4	84029775	84033537	ENSG00000145287	3763	*	7.09	5.79	6.94	7.15	4.46	132	140.29	58.08	52.81	111.61	133.41	132.55	152.39	20.84	23.3	-1.3	0.000242	0.0205	-0.15	0.656	0.814	0.07	0.847	0.93	2.79	6.36e-13	2.67e-11	84011958	84058228	-	7	19698	TTS	COPS4	34714	promoter-TSS	0.030577	0.474747	NM_001130716	Loss	Unchanged	Unchanged	Gain
RP11-383J24.1	chr8	125284184	125291940	ENSG00000253227	7757	*	8.12	6.95	8.36	8.06	6.14	292	266.34	141.41	106.38	375.47	281.81	265.96	267.12	65.71	75.73	-1.17	0.00025	0.0207	0.24	0.474	0.693	-0.07	0.832	0.923	2.23	8.91e-12	2.91e-10	125283923	125289825	+	2	1763	TTS	RNU6-756P	15069	Intergenic	0.011605	0.47228		Loss	Unchanged	Unchanged	Gain
PKP2	chr12	32960802	32966656	ENSG00000057294	5855	*	7.23	5.94	6.47	5.55	5.01	134	165.93	66.5	55.87	89.28	88.41	46.18	47.29	36.86	27.67	-1.29	0.00025	0.0207	-0.76	0.0307	0.2	-1.68	5.02e-06	0.000986	2.41	1.11e-10	2.75e-09	32943678	33049774	-	13	20051	TTS	RP11-8P13.1	52322	intron	0.011105	0.442774	NM_001005242, intron 9 of 12	Loss	Unchanged	Loss	Gain
LA16c-444G7.1	chr16	88294854	88299782	ENSG00000261273	4929	*	6.85	5.38	6.04	6.85	4.4	87	143.14	37.88	45.15	59.79	71.83	129.13	101.59	23.24	18.93	-1.47	0.000258	0.0212	-0.81	0.0404	0.224	0	0.995	0.997	2.57	1.02e-09	2.04e-08	88268390	88336117	+	3	28928	TSS	LA16c-444G7.2	68495	Intergenic	0.030039	0.615666		Loss	Unchanged	Unchanged	Gain
AL512638.1	chr1	116033819	116038049	ENSG00000265534	4231	*	6.2	4.35	6.33	5.52	5.33	66	81.18	10.1	30.61	71.75	89.2	46.18	45.54	44.08	36.41	-1.85	0.000299	0.0231	0.13	0.745	0.868	-0.68	0.0897	0.305	1.04	0.00773	0.0204	116028271	116028364	+	0	7570	TTS	RP4-663N10.2	17286	Intergenic	0.007803	0.506856		Loss	Unchanged	Unchanged	Gain
RP11-897M7.1	chr12	131938817	131944540	ENSG00000256209	5724	*	6.72	5.29	6.37	6.77	5.25	86	124.62	36.2	42.09	62.18	103.41	135.98	82.33	36.06	40.05	-1.43	0.000323	0.0235	-0.35	0.383	0.625	0.05	0.904	0.957	1.67	1.12e-05	7.82e-05	131953855	131977496	-	2	12176	TTS	RP13-507P19.1	86074	Intergenic	0.027787	0.552857		Loss	Unchanged	Unchanged	Gain
GPRC5A	chr12	13040492	13047191	ENSG00000013588	6700	*	8.35	7.23	7.95	7.78	5.87	291	361.05	160.78	140.05	211.25	281.81	221.49	218.95	64.11	53.16	-1.12	0.000342	0.0243	-0.4	0.229	0.487	-0.57	0.0744	0.279	2.62	4.13e-15	3.03e-13	13043715	13070871	+	3	126	TSS	RPL13AP20	14798	promoter-TSS	0.020752	0.499478	NM_003979	Loss	Unchanged	Unchanged	Gain
RPS4XP19	chr18	8946885	8952190	ENSG00000242058	5306	*	6.68	5.15	6.29	6.91	5.42	73	131.75	42.09	29.08	74.94	81.31	111.17	129.62	44.88	40.78	-1.52	0.000404	0.0269	-0.39	0.322	0.572	0.23	0.559	0.769	1.66	1.36e-05	9.28e-05	9020026	9020762	+	0	70488	TSS	SOGA2	116762	Intergenic	0.013575	0.485957		Loss	Unchanged	Unchanged	Gain
EPHA8	chr1	22872678	22879265	ENSG00000070886	6588	*	7.19	5.79	6.65	6.52	5.58	98	194.41	52.19	58.16	90.08	111.3	103.48	80.58	55.3	40.05	-1.41	0.000488	0.0288	-0.54	0.176	0.432	-0.67	0.0942	0.312	1.82	4.7e-06	3.69e-05	22890056	22930087	+	16	14084	TSS	ZBTB40	18322	Intergenic	0.01822	0.560043		Loss	Unchanged	Unchanged	Gain
PSMC1P4	chr5	55581308	55584079	ENSG00000248781	2772	*	6.11	4.48	6.31	7.33	4.09	59	79.05	29.46	15.31	82.91	75.78	171.04	149.76	21.64	12.38	-1.62	0.000623	0.0325	0.2	0.615	0.789	1.22	0.000734	0.0221	2.32	1.94e-07	2.21e-06	55571130	55572457	-	0	10236	TSS	RNU6ATAC2P	10696	Intergenic	0.009386	0.433418		Loss	Unchanged	Gain	Gain
RP11-392P7.6	chr12	13078445	13080906	ENSG00000247498	2462	*	6.36	4.9	6.08	5.91	3.86	95	69.79	34.51	25.26	66.17	69.47	65.85	54.3	14.42	14.56	-1.46	0.00064	0.0325	-0.28	0.477	0.696	-0.46	0.253	0.515	2.78	2.92e-10	6.59e-09	13080695	13136747	+	3	1020	TSS	GPRC5A	8804	promoter-TSS	0.021138	0.487607	NR_149063	Loss	Unchanged	Unchanged	Gain
EEPD1	chr7	36318920	36328148	ENSG00000122547	9229	*	7.89	6.66	7.87	7.33	6.36	175	299.81	90.07	111.73	233.57	234.45	184.72	136.63	94.56	69.18	-1.23	0.000613	0.0325	-0.02	0.946	0.973	-0.56	0.125	0.361	1.83	2.95e-07	3.2e-06	36192757	36341152	+	8	17618	TTS	AC006960.5	21705	intron	0.015498	0.507802	NM_030636, intron 4 of 7	Loss	Unchanged	Unchanged	Gain
TCEB1P28	chr19	2555307	2560408	ENSG00000105694	5102	*	6.68	5.15	6.57	6.74	4.77	75	129.61	24.41	46.68	86.89	103.41	124	90.21	30.45	24.03	-1.53	0.000662	0.0328	-0.1	0.776	0.885	0.07	0.88	0.947	2.09	4.2e-07	4.4e-06	2538107	2538786	+	1	19072	TTS	GNG7	46642	intron	0.035098	0.54852	NM_052847, intron 2 of 4	Loss	Unchanged	Unchanged	Gain
CTD-2005H7.2	chr11	86447432	86451638	ENSG00000255250	4207	*	7	5.79	6.53	7.43	4.52	125	130.32	55.56	55.1	100.44	84.46	177.02	167.28	23.24	22.57	-1.21	0.000681	0.0333	-0.47	0.186	0.442	0.43	0.189	0.447	2.65	7.06e-12	2.36e-10	86438396	86476307	+	4	11139	TSS	CTD-2005H7.1	24401	Intergenic	0.005232	0.440086		Loss	Unchanged	Unchanged	Gain
SMAD6	chr15	67064161	67068707	ENSG00000137834	4547	*	7.09	5.67	6.84	7.25	5.47	88	185.16	46.3	55.87	101.24	128.67	190.71	114.73	47.28	41.51	-1.42	0.000678	0.0333	-0.25	0.533	0.733	0.16	0.711	0.86	1.9	1.35e-06	1.23e-05	66994565	67074338	+	4	7904	TTS	RP11-622C24.1	34307	intron	0.017382	0.512758	NR_027654, intron 4 of 4	Loss	Unchanged	Unchanged	Gain
PRKCH	chr14	61644014	61646733	ENSG00000027075	2720	*	6.91	5.6	7.19	6.22	5.31	94	145.99	48.82	48.21	147.48	143.67	67.56	81.45	40.07	39.32	-1.31	0.000699	0.0336	0.28	0.451	0.676	-0.69	0.0696	0.269	1.81	1.75e-06	1.55e-05	61654276	61997302	+	13	8902	TSS	SLC38A6	94924	Intergenic	0.01067	0.468555		Loss	Unchanged	Unchanged	Gain
SMAD6	chr15	67035465	67040469	ENSG00000137834	5005	*	6.74	5.15	6.8	6.73	5.53	110	103.26	17.68	53.57	134.72	87.62	129.99	82.33	47.28	45.15	-1.58	0.000764	0.0343	0.06	0.87	0.935	-0.01	0.989	0.995	1.65	4.29e-06	3.4e-05	66994565	67074338	+	4	36371	TTS	RP11-321F6.1	59835	intron	0.012792	0.511191	NR_027654, intron 4 of 4	Loss	Unchanged	Unchanged	Gain
RXRA	chr9	137347805	137353313	ENSG00000186350	5509	*	6.53	5.07	6.35	6.77	5.53	68	116.79	25.25	42.09	71.75	91.57	123.15	95.46	58.5	34.22	-1.46	0.00104	0.0389	-0.18	0.645	0.807	0.24	0.548	0.761	1.31	0.00121	0.00444	137218425	137328865	+	11	21694	TTS	RP11-473E2.2	46758	Intergenic	0.025422	0.613108		Loss	Unchanged	Unchanged	Gain
RNU6-968P	chr1	236069951	236072563	ENSG00000206803	2613	*	6.22	4.82	5.25	5.39	3.7	74	74.77	25.25	31.38	38.26	37.89	41.9	42.04	12.82	13.11	-1.39	0.00107	0.039	-0.97	0.0187	0.165	-0.83	0.0409	0.202	2.75	8.57e-10	1.75e-08	236078714	236078821	+	0	7457	TSS	RP5-940F7.2	34595	Intergenic	0.011873	0.435681		Loss	Unchanged	Unchanged	Gain
RNA5SP413	chr16	34978961	34984842	ENSG00000252182	5882	*	7.12	5.83	5.64	5.56	5.11	96	182.31	56.4	57.4	45.44	54.47	58.15	35.91	39.27	29.86	-1.29	0.00114	0.0397	-1.48	0.000355	0.0272	-1.56	0.000262	0.0121	2.24	1.95e-08	2.86e-07	34981402	34981511	+	0	390	TTS	RNA5SP410	1436	intron	0.02534	0.591566	NR_033985, intron 1 of 2	Loss	Loss	Loss	Gain
PPP2R5E	chr14	63821665	63825030	ENSG00000154001	3366	*	6.27	4.9	6.24	6.3	4.95	70	84.74	25.25	34.44	75.73	74.99	70.13	87.58	39.27	22.57	-1.37	0.00127	0.0416	-0.04	0.912	0.957	0.03	0.951	0.979	1.76	1.56e-05	0.000105	63838074	64010092	-	13	14726	TTS	GPHB5	37754	Intergenic	0.009512	0.46003		Loss	Unchanged	Unchanged	Gain
SMAD6	chr15	67052207	67059181	ENSG00000137834	6975	*	7.95	6.8	7.84	8.31	6.31	178	317.61	121.21	101.79	214.44	244.71	362.6	274.13	87.35	71.36	-1.15	0.00141	0.0444	-0.11	0.756	0.874	0.36	0.329	0.591	1.89	1.1e-07	1.33e-06	66994565	67074338	+	4	18644	TTS	RP11-622C24.1	45047	intron	0.017783	0.52667	NR_027654, intron 4 of 4	Loss	Unchanged	Unchanged	Gain
TM4SF19-AS1	chr3	196053303	196055006	ENSG00000235897	1704	*	6.05	4.62	6.02	5.14	3.6	71	61.24	27.78	21.43	75.73	53.68	44.47	26.27	9.62	14.56	-1.43	0.00146	0.0449	-0.03	0.944	0.973	-0.9	0.0438	0.21	2.57	6.83e-08	8.71e-07	196045220	196052441	+	1	1714	TTS	TM4SF19	11090	intron	0.017039	0.485026	NM_138461, intron 2 of 4	Loss	Unchanged	Unchanged	Gain
CLU	chr8	27448488	27453547	ENSG00000120885	5060	*	7.07	5.78	6.23	5.71	5.01	125	143.14	74.92	35.2	67.76	82.1	47.89	56.93	44.08	20.39	-1.28	0.00158	0.0469	-0.84	0.0194	0.166	-1.36	0.000228	0.0111	2.22	7.11e-08	9.05e-07	27454433	27472548	-	8	3416	TTS	GULOP	4428	Intergenic	0.02669	0.503855		Loss	Unchanged	Loss	Gain
OARD1	chr6	40994640	41001841	ENSG00000124596	7202	*	7.7	6.47	7.58	7.56	5.46	131	284.85	85.86	91.07	175.38	206.03	198.4	179.54	44.88	42.96	-1.23	0.00174	0.0495	-0.12	0.745	0.868	-0.14	0.716	0.863	2.39	1.97e-09	3.65e-08	41001365	41038956	-	7	3124	TTS	UNC5CL	3470	intron	0.018194	0.535759	NM_173561, intron 7 of 8	Loss	Unchanged	Unchanged	Gain
AC000089.3	chr22	19783660	19789309	ENSG00000235776	5650	*	7.39	6.24	7.15	7.35	5.99	126	210.08	68.18	82.65	114.79	168.93	187.29	138.38	71.32	56.07	-1.16	0.00181	0.05	-0.24	0.516	0.721	-0.05	0.893	0.953	1.66	4.96e-06	3.87e-05	19779816	19780617	+	0	5868	TTS	GNB1L	15738	intron	0.024079	0.587715	NM_053004, intron 7 of 7	Loss	Unchanged	Unchanged	Gain
SYNE2	chr14	64698780	64703008	ENSG00000054654	4229	*	7.01	5.9	7.52	6.67	5.6	125	133.17	67.34	52.04	200.89	166.56	102.62	100.72	48.88	48.06	-1.11	0.00191	0.0508	0.51	0.13	0.378	-0.34	0.313	0.575	1.8	2.78e-07	3.04e-06	64319682	64693165	+	115	7729	TTS	ESR2	60234	intron	0.01585	0.500473	NR_073497, intron 6 of 6	Loss	Unchanged	Unchanged	Gain
RNA5SP258	chr8	26009167	26010982	ENSG00000199620	1816	*	6.23	4.92	5.29	5.61	3.14	85	65.52	36.2	24.49	27.9	50.52	46.18	51.67	9.62	8.01	-1.31	0.0026	0.0582	-0.94	0.0352	0.212	-0.62	0.126	0.364	3.23	6.14e-11	1.62e-09	25994395	25994514	+	0	15560	TTS	RP11-98P2.1	102324	Intergenic	0.006615	0.444077		Loss	Unchanged	Unchanged	Gain
SSBP3-AS1	chr1	54715340	54723234	ENSG00000198711	7895	*	8.58	7.54	8.16	8.8	5.54	281	484.25	199.5	173.72	275.82	296.81	507.13	385.36	54.49	38.59	-1.04	0.00258	0.0582	-0.42	0.242	0.501	0.22	0.543	0.759	3.14	6.12e-17	6.75e-15	54703709	54704736	+	0	14551	TTS	SSBP3	26983	intron	0.019258	0.530023	NM_018070, intron 6 of 16	Loss	Unchanged	Unchanged	Gain
SOGA1	chr20	35429807	35436111	ENSG00000149639	6305	*	6.46	5.01	6.96	6.65	5.16	65	111.09	18.52	45.92	105.23	144.46	111.17	90.21	43.27	28.4	-1.45	0.00269	0.0587	0.5	0.209	0.466	0.19	0.636	0.817	1.6	8.17e-05	0.000444	35405844	35492089	-	14	27115	TTS	DSN1	30738	intron	0.014596	0.516022	NM_080627, intron 10 of 14	Loss	Unchanged	Unchanged	Gain
AC074011.2	chr2	28809429	28818429	ENSG00000230730	9001	*	8.09	7.08	7.38	7.81	6.24	206	340.4	126.26	143.88	163.42	169.72	231.76	218.08	76.13	75	-1.02	0.00322	0.064	-0.71	0.0446	0.233	-0.28	0.417	0.664	2.08	1.92e-09	3.57e-08	28856147	28887406	-	1	42218	TTS	PLB1	52725	intron	0.017446	0.510556	NM_153021, intron 29 of 57	Loss	Unchanged	Unchanged	Gain
RP11-720N19.1	chr17	25866194	25874358	ENSG00000263368	8165	*	7.41	6.26	6.16	7.35	6.17	129	210.08	57.24	95.66	56.6	86.83	140.25	186.55	75.33	69.18	-1.15	0.00319	0.064	-1.24	0.00166	0.0554	-0.05	0.874	0.944	1.5	1.87e-05	0.000123	25853411	25854249	-	0	16027	TSS	KSR1	80441	intron	0.012618	0.512739	NM_014238, intron 2 of 20	Loss	Loss	Unchanged	Gain
AC093166.2	chr2	112458245	112463771	ENSG00000227842	5527	*	6.8	5.73	6.68	6.7	5.37	114	108.24	53.03	52.81	122.77	82.89	87.23	120.86	46.48	36.41	-1.07	0.00328	0.0648	-0.11	0.763	0.878	-0.09	0.793	0.904	1.74	2.23e-06	1.92e-05	112475084	112475414	+	0	14076	TSS	AC093166.1	28088	Intergenic	0.015204	0.514296		Loss	Unchanged	Unchanged	Gain
AP000362.1	chr22	23357973	23360482	ENSG00000223679	2510	*	6.04	4.61	6.87	5.76	4.64	42	89.73	25.25	23.72	137.91	95.52	49.6	58.68	21.64	28.4	-1.43	0.00346	0.0655	0.83	0.0594	0.263	-0.28	0.514	0.74	1.67	0.000185	0.000896	23332864	23350523	+	2	8704	TTS	AP000361.2	28472	Intergenic	0.038278	0.539259		Loss	Unchanged	Unchanged	Gain
CTA-992D9.7	chr22	27503108	27507876	ENSG00000231405	4769	*	7.88	6.77	7.97	8.18	5.69	167	304.79	86.7	131.63	256.69	243.92	302.74	276.76	49.69	53.88	-1.11	0.00345	0.0655	0.09	0.824	0.911	0.3	0.419	0.666	2.39	1.01e-10	2.54e-09	27539438	27555840	+	1	33946	TSS	CTA-992D9.6	49012	Intergenic	0.012587	0.483431		Loss	Unchanged	Unchanged	Gain
NFKBIA	chr14	35865130	35867963	ENSG00000100906	2834	*	6.43	5.17	5.81	6.1	3.7	69	103.97	27.78	44.39	57.4	54.47	62.43	74.44	12.82	13.11	-1.26	0.00341	0.0655	-0.63	0.114	0.356	-0.34	0.381	0.635	2.88	2.32e-10	5.36e-09	35870716	35873952	-	5	4170	TTS	RP11-561B11.1	8272	Intergenic	0.011299	0.481821		Loss	Unchanged	Unchanged	Gain
CTD-2325P2.3	chr14	69134420	69138069	ENSG00000258623	3650	*	6.28	5.08	6.68	5.4	5.6	68	87.59	35.35	32.14	109.21	96.31	27.37	56.93	48.08	48.79	-1.2	0.00358	0.0665	0.4	0.286	0.541	-0.88	0.0481	0.22	1.1	0.00277	0.00877	69150127	69152282	-	1	13882	TTS	RAD51B	60690	intron	0.011239	0.506166	NM_001321818, intron 10 of 10	Loss	Unchanged	Unchanged	Gain
RP11-101O21.1	chr17	72081238	72091211	ENSG00000266357	9974	*	8.25	7.18	8.44	8.58	6.31	203	405.21	144.78	146.17	349.17	346.54	403.65	362.59	85.75	72.82	-1.06	0.00375	0.0677	0.19	0.615	0.789	0.33	0.378	0.633	2.15	4.43e-09	7.59e-08	72060495	72150351	-	4	25730	TTS	RPL38	113566	Intergenic	0.008123	0.469367		Loss	Unchanged	Unchanged	Gain
CTA-204B4.2	chr8	141510382	141513417	ENSG00000259891	3036	*	6.03	4.7	5.62	6.09	5.09	49	81.9	25.25	26.79	48.63	49.73	77.82	58.68	36.86	31.31	-1.33	0.00387	0.0682	-0.41	0.328	0.578	0.06	0.902	0.957	1.32	0.00102	0.00382	141515911	141518142	-	0	4012	TTS	CHRAC1	9496	Intergenic	0.016809	0.480725		Loss	Unchanged	Unchanged	Gain
RPL3P10	chr8	39036399	39040614	ENSG00000243095	4216	*	6.46	5.33	6.08	6.6	4.14	81	94.71	43.77	36.73	69.35	66.31	118.02	76.2	18.43	16.75	-1.13	0.00424	0.0712	-0.37	0.318	0.569	0.14	0.709	0.859	2.55	1.04e-09	2.07e-08	39015056	39016220	-	0	22286	TSS	ADAM32	73418	intron	0.018984	0.491103	NM_001313994, intron 9 of 21	Loss	Unchanged	Unchanged	Gain
PDLIM1	chr10	97003844	97008654	ENSG00000107438	4811	*	6.94	5.86	6.7	6.68	5.16	96	149.55	58.08	58.16	99.65	108.94	114.6	91.09	36.06	35.68	-1.08	0.00426	0.0712	-0.24	0.517	0.722	-0.26	0.486	0.718	1.96	3.39e-07	3.63e-06	96997328	97050781	-	6	8921	TTS	RP11-310E22.4	15348	intron	0.008734	0.469647	NM_020992, intron 5 of 6	Loss	Unchanged	Unchanged	Gain
ST13P20	chr1	82265468	82269091	ENSG00000215875	3624	*	6.08	4.85	5.63	5.93	4.4	63	71.93	29.46	28.32	39.06	59.99	75.26	46.42	22.44	19.66	-1.22	0.00439	0.0715	-0.45	0.289	0.544	-0.15	0.715	0.863	1.84	1.37e-05	9.38e-05	82187377	82188753	+	1	78526	TTS	LPHN2	190826	promoter-TSS	0.080066	0.622136	NM_001366007	Loss	Unchanged	Unchanged	Gain
CEACAMP6	chr19	43287822	43292534	ENSG00000238092	4713	*	6.71	2.65	6.43	6.33	4.3	88	121.78	11.78	0.77	90.88	81.31	90.65	70.07	16.03	23.3	-4.06	0.00447	0.0721	-0.28	0.436	0.665	-0.38	0.303	0.565	2.61	4.23e-10	9.23e-09	43285357	43290747	-	2	569	TSS	PSG8	33300	Intergenic	0.006368	0.440577		Loss	Unchanged	Unchanged	Gain
TNS3	chr7	47291789	47295098	ENSG00000136205	3310	*	6.22	4.88	6.57	5.63	5.16	47	102.55	23.57	35.2	83.7	105.78	55.59	43.79	40.07	31.31	-1.35	0.00515	0.0776	0.34	0.444	0.67	-0.59	0.188	0.445	1.41	0.000768	0.00302	47314751	47621742	-	30	21308	TTS	AC004870.3	174718	Intergenic	0.030532	0.523723		Loss	Unchanged	Unchanged	Gain
RP11-46E17.6	chr22	27857255	27859570	ENSG00000227880	2316	*	6.59	5.55	6.56	5.79	4.8	95	98.27	45.45	48.21	82.91	105.78	48.75	62.18	28.85	26.94	-1.05	0.00555	0.0813	-0.03	0.923	0.962	-0.8	0.0354	0.187	2.02	1.94e-07	2.22e-06	27853207	27856021	-	1	2392	TSS	CTA-929C8.8	83186	Intergenic	0.016422	0.51879		Loss	Unchanged	Unchanged	Gain
C1R	chr12	7242021	7247409	ENSG00000159403	5389	*	6.85	5.74	6.4	6.62	5.61	92	138.87	66.5	40.56	85.3	83.67	111.17	85.83	56.9	40.78	-1.11	0.00573	0.0827	-0.45	0.225	0.484	-0.23	0.533	0.752	1.52	5.6e-05	0.000322	7187835	7245131	-	10	416	TSS	C1RL	1587	promoter-TSS	0.016893	0.528768	NM_001354346	Loss	Unchanged	Unchanged	Gain
HINT2	chr9	35814194	35816404	ENSG00000137133	2211	*	6.23	5.1	6.5	5.63	3.86	70	80.47	37.04	31.38	95.66	85.25	45.33	53.42	14.42	14.56	-1.14	0.00581	0.083	0.27	0.48	0.697	-0.61	0.126	0.363	2.63	1.97e-09	3.65e-08	35812956	35815351	-	4	52	TSS	TMEM8B	852	promoter-TSS	0.049796	0.532579	NM_032593	Loss	Unchanged	Unchanged	Gain
DOCK3	chr3	51380253	51382883	ENSG00000088538	2631	*	6.23	5.07	6.1	6.19	4.2	62	88.3	31.99	35.2	70.95	66.31	70.98	75.32	18.43	18.2	-1.16	0.00596	0.0843	-0.13	0.728	0.857	-0.04	0.907	0.958	2.23	2.39e-07	2.67e-06	50712671	51421629	+	52	40061	TTS	MANF	40909	intron	0.006466	0.496578	NM_004947, intron 38 of 52	Loss	Unchanged	Unchanged	Gain
CTD-2568A17.1	chr19	51282577	51285425	ENSG00000261341	2849	*	6.19	5.04	5.55	5.32	3.96	61	85.46	31.14	34.44	47.83	45.78	38.48	41.16	14.42	16.75	-1.16	0.00635	0.0874	-0.65	0.115	0.356	-0.88	0.0353	0.187	2.38	9.45e-08	1.17e-06	51279397	51289374	-	3	4604	TTS	GPR32	9012	intron	0.023885	0.512289	NR_134883, intron 3 of 3	Loss	Unchanged	Unchanged	Gain
RPEP4	chr22	30017884	30020663	ENSG00000233010	2780	*	6.57	5.52	6.03	6.07	4.4	82	107.53	47.98	43.62	70.95	59.99	59.86	74.44	22.44	19.66	-1.05	0.00661	0.089	-0.53	0.161	0.414	-0.5	0.189	0.447	2.39	4.95e-09	8.41e-08	30004888	30005490	+	0	13784	TTS	NF2	19728	intron	0.014039	0.451961	NM_181831, intron 1 of 14	Loss	Unchanged	Unchanged	Gain
LDLRAD3	chr11	36167003	36171777	ENSG00000179241	4775	*	6.57	5.44	6.02	6.66	4.5	66	124.62	43.77	42.86	72.54	57.63	100.06	102.47	24.04	21.12	-1.14	0.00682	0.0904	-0.55	0.184	0.441	0.09	0.843	0.928	2.19	4.37e-07	4.56e-06	35965627	36253686	+	5	84296	TTS	LINC00610	121443	intron	0.011523	0.464181	NM_174902, intron 4 of 5	Loss	Unchanged	Unchanged	Gain
CTA-503F6.2	chr22	27601507	27604141	ENSG00000238195	2635	*	6.41	5.29	5.3	4	5.2	67	103.26	43.77	34.44	39.86	38.68	17.1	14.89	38.47	34.95	-1.12	0.00685	0.0907	-1.12	0.00766	0.114	-2.41	3.87e-07	0.000169	1.49	0.000127	0.000652	27600172	27601088	+	1	1736	TTS	RP5-1172A22.1	14485	Intergenic	0.008355	0.469628		Loss	Unchanged	Loss	Gain
ZBTB40	chr1	22862283	22866030	ENSG00000184677	3748	*	6.36	5.29	6.07	6.35	4.61	85	79.76	35.35	42.86	61.38	73.41	93.22	70.07	24.84	24.03	-1.07	0.00721	0.0933	-0.29	0.449	0.675	-0.01	0.976	0.99	1.96	1.12e-06	1.05e-05	22778343	22857650	+	18	6506	TTS	ZBTB40-IT1	17956	Intergenic	0.017085	0.526288		Loss	Unchanged	Unchanged	Gain
CTD-2325P2.3	chr14	69148785	69153165	ENSG00000258623	4381	*	6.28	5.15	6.75	5.46	5.18	83	72.64	42.93	28.32	105.23	110.51	47.89	40.29	36.06	36.41	-1.13	0.00728	0.0938	0.47	0.191	0.446	-0.82	0.0426	0.207	1.65	1.38e-05	9.43e-05	69150127	69152282	-	1	848	TTS	RAD51B	45960	Intergenic	0.01119	0.484703		Loss	Unchanged	Unchanged	Gain
HMOX1	chr22	35785611	35793774	ENSG00000100292	8164	*	7.24	6.12	7.57	6.77	6.93	92	210.08	79.13	59.69	211.25	169.72	95.78	122.61	118.6	125.97	-1.12	0.00741	0.0945	0.33	0.423	0.656	-0.47	0.255	0.518	0.72	0.047	0.0865	35776827	35790207	+	4	514	TTS	MCM5	6362	3' UTR	0.017765	0.494794	NM_002133, exon 5 of 5	Loss	Unchanged	Unchanged	Unchanged
TSEN15	chr1	184020240	184021628	ENSG00000198860	1389	*	6.31	5.22	6.18	5.81	3.08	80	78.33	42.93	31.38	70.95	74.2	40.19	71.82	9.62	7.28	-1.09	0.00753	0.095	-0.13	0.739	0.864	-0.5	0.23	0.491	3.38	4.17e-12	1.49e-10	184020810	184043346	+	5	124	TSS	COLGALT2	14323	promoter-TSS	0.048306	0.520173	NM_052965	Loss	Unchanged	Unchanged	Gain
TBX1	chr22	19769873	19774203	ENSG00000184058	4331	*	6.98	5.87	6.69	6.77	5.75	80	171.62	55.56	61.22	91.68	114.46	124	93.71	69.72	37.87	-1.11	0.00766	0.0955	-0.29	0.478	0.696	-0.21	0.601	0.796	1.51	0.000323	0.00144	19744225	19771116	+	9	922	TTS	GNB1L	1292	TTS	0.024255	0.568129	NM_005992	Loss	Unchanged	Unchanged	Gain
RP11-653J6.1	chr15	66590492	66592668	ENSG00000261318	2177	*	6.52	5.48	5.43	5.26	4.21	80	103.97	41.25	48.21	38.26	48.15	50.46	26.27	22.44	14.56	-1.04	0.00774	0.0959	-1.09	0.0068	0.108	-1.26	0.00373	0.0551	2.49	5.43e-09	9.17e-08	66570835	66585695	-	1	5885	TSS	DIS3L	6026	intron	0.012414	0.426471	NM_001323937, intron 2 of 15	Loss	Unchanged	Loss	Gain
RP11-101O21.1	chr17	72074171	72080564	ENSG00000266357	6394	*	7.23	6.14	7.15	7.3	5.6	91	210.08	72.39	68.88	139.51	145.25	186.43	129.62	47.28	49.52	-1.09	0.00837	0.0994	-0.08	0.832	0.915	0.07	0.879	0.946	1.92	1.21e-06	1.12e-05	72060495	72150351	-	4	16872	TTS	RPL38	122424	Intergenic	0.015175	0.535117		Loss	Unchanged	Unchanged	Gain
RP11-244F12.2	chr15	63347635	63362029	ENSG00000259627	14395	*	8.33	9.32	8.8	8.09	6.7	335	306.93	636.37	639.8	488.67	402.59	293.33	253.11	104.18	104.13	0.99	0.000693	0.0336	0.47	0.14	0.392	-0.23	0.46	0.699	1.96	5.57e-10	1.18e-08	63362223	63364110	-	1	7391	TTS	TPM1	9256	exon	0.012298	0.429137	NM_001365782, exon 7 of 8	Unchanged	Unchanged	Unchanged	Gain
RANGAP1	chr22	41656140	41664799	ENSG00000100401	8660	*	7.86	8.85	8.55	9.04	5.91	196	267.05	447.81	473.72	350.76	401.01	596.07	454.55	78.54	41.51	0.99	0.00139	0.0442	0.7	0.0365	0.216	1.18	0.000432	0.0161	2.21	4.98e-09	8.46e-08	41641614	41682255	-	16	18856	TTS	CHADL	23532	intron	0.020559	0.545791	NM_001317930, intron 5 of 15	Unchanged	Unchanged	Gain	Gain
DIABLO	chr12	122686843	122694786	ENSG00000184047	7944	*	7.5	8.5	8.49	8.6	5.71	153	208.66	360.27	364.29	318.87	397.85	395.95	378.35	60.9	43.69	1	0.00141	0.0444	0.99	0.00376	0.0833	1.1	0.000781	0.0229	1.99	3.49e-08	4.82e-07	122692215	122712081	-	6	1400	TTS	RP11-512M8.5	1510	intron	0.040796	0.5474	NM_030765, intron 2 of 2	Unchanged	Unchanged	Gain	Gain
FNDC8	chr17	33455435	33465161	ENSG00000073598	9727	*	8.38	9.32	9.01	9.17	6.02	305	361.77	638.05	641.33	448.81	585.72	635.41	516.73	62.51	66.99	0.94	0.00154	0.0465	0.63	0.0559	0.257	0.79	0.0135	0.112	2.51	1.63e-14	1e-12	33448597	33457751	+	3	2547	TTS	NLE1	4527	intron	0.016247	0.520358	NM_018096, intron 11 of 12	Unchanged	Unchanged	Unchanged	Gain
SNORA57	chr11	62427706	62440855	ENSG00000212567	13150	*	8.53	9.52	9.42	9.07	6.28	313	427.28	701.18	762.24	632.16	739.66	561.01	513.23	72.93	82.28	0.98	0.00157	0.0468	0.89	0.00821	0.118	0.54	0.0985	0.319	2.41	3.15e-13	1.43e-11	62432893	62433042	+	0	1238	TTS	METTL12	1496	exon	0.030879	0.510457	NM_001043229, exon 3 of 3	Unchanged	Unchanged	Unchanged	Gain
TCOF1	chr5	149748199	149768283	ENSG00000070814	20085	*	8.54	9.51	8.86	9.25	7.2	318	427.99	730.64	727.04	382.65	544.68	669.61	550.01	169.09	124.52	0.97	0.00172	0.0492	0.31	0.369	0.613	0.71	0.0311	0.175	1.66	4.33e-07	4.52e-06	149737201	149779870	+	27	21040	TSS	CD74	22991	intron	0.012	0.5356	NM_001008657, intron 14 of 17	Unchanged	Unchanged	Unchanged	Gain
WDR54	chr2	74647891	74657669	ENSG00000005448	9779	*	8	8.97	9.28	9.05	6.52	223	289.13	460.44	540.31	571.58	670.98	549.89	513.23	92.96	90.29	0.97	0.00176	0.0497	1.28	0.000112	0.0148	1.05	0.000989	0.0258	1.65	4.52e-07	4.7e-06	74648855	74652881	+	9	101	TTS	RTKN	222	TTS	0.02107	0.544181	NM_001015055	Unchanged	Gain	Gain	Gain
SMARCB1	chr22	24173056	24183239	ENSG00000099956	10184	*	8.62	9.6	8.96	9.18	6.97	336	452.92	714.65	838.77	381.05	614.14	665.34	497.46	141.04	109.95	0.98	0.00182	0.05	0.34	0.356	0.602	0.56	0.0961	0.315	1.83	2.74e-08	3.87e-07	24129149	24176703	+	8	1444	TTS	DERL3	1458	3' UTR	0.026517	0.581165	NM_001317946, exon 9 of 9	Unchanged	Unchanged	Unchanged	Gain
MEA1	chr6	42973286	42985436	ENSG00000124733	12151	*	7.61	8.54	8.1	8.54	5.93	183	207.23	374.58	370.41	237.56	312.6	403.65	340.69	61.71	60.44	0.93	0.00183	0.0501	0.5	0.137	0.388	0.93	0.0034	0.0522	2.03	9.27e-10	1.87e-08	42979831	42981706	-	3	470	TTS	PPP2R5D	719	TTS	0.02066	0.541811	NM_001318942	Unchanged	Unchanged	Unchanged	Gain
LTBP4	chr19	41125158	41139342	ENSG00000090006	14185	*	7.55	8.55	8.81	8.82	6.29	162	213.64	328.28	420.15	428.09	470.47	483.18	422.14	84.95	71.36	0.99	0.00189	0.0506	1.26	0.000139	0.0165	1.27	9.69e-05	0.00656	1.61	1.45e-06	1.31e-05	41099071	41135725	+	33	3475	TTS	RN7SL758P	19295	intron	0.025241	0.529188	NM_003573, intron 31 of 33	Unchanged	Gain	Gain	Gain
KCTD15	chr19	34284757	34289871	ENSG00000153885	5115	*	7.45	8.42	7.89	7.56	5.18	154	196.55	321.55	362.75	176.97	298.39	193.27	183.92	44.08	28.4	0.97	0.00195	0.0511	0.44	0.234	0.493	0.11	0.754	0.886	2.44	9.04e-11	2.29e-09	34287766	34306668	+	7	452	TSS	CHST8	22901	promoter-TSS	0.078819	0.611068	NM_001129995	Unchanged	Unchanged	Unchanged	Gain
RP1-120G22.11	chr1	6258007	6263399	ENSG00000226944	5393	*	7.05	8.04	7.85	7.86	4.6	117	148.84	256.74	267.86	200.09	262.08	252.28	212.82	28.05	20.39	0.98	0.002	0.0516	0.8	0.0212	0.172	0.81	0.0159	0.123	2.6	3.72e-11	1.05e-09	6264899	6265840	-	2	4196	TTS	RPL22	8601	Intergenic	0.025227	0.508717		Unchanged	Unchanged	Unchanged	Gain
PDLIM4	chr5	131600573	131611547	ENSG00000131435	10975	*	7.26	8.26	7.93	8.74	6.32	142	163.79	255.05	358.16	237.56	248.66	496.01	360.84	86.55	73.55	1	0.00199	0.0516	0.67	0.0405	0.224	1.49	7.74e-06	0.00127	1.32	8.01e-05	0.000436	131593363	131609147	+	6	3087	TTS	P4HA2	24904	intron	0.017406	0.564425	NM_001131027, intron 3 of 5	Unchanged	Unchanged	Gain	Gain
MTHFD1L	chr6	151209766	151222735	ENSG00000120254	12970	*	7.49	8.44	8.19	8.02	5.86	172	188.72	377.11	315.31	319.67	266.02	278.79	239.97	62.51	53.88	0.94	0.00209	0.0531	0.7	0.0319	0.204	0.52	0.101	0.324	1.96	6.81e-09	1.12e-07	151186684	151423023	+	27	29566	TSS	RP1-99E18.2	39852	intron	0.0155	0.439664	NM_001242768, intron 7 of 27	Unchanged	Unchanged	Unchanged	Gain
BAZ1B	chr7	72934652	72937421	ENSG00000009954	2770	*	7.02	8	7.78	7.39	4.55	111	148.12	246.63	267.09	206.47	232.87	202.68	133.12	27.25	19.66	0.99	0.00221	0.0551	0.76	0.0261	0.187	0.37	0.307	0.57	2.58	1.13e-10	2.81e-09	72854727	72936602	-	19	566	TSS	RNU6-1198P	14432	intron	0.065751	0.573131	NM_001370402, intron 1 of 18	Unchanged	Unchanged	Unchanged	Gain
BANF1P1	chr14	69401476	69411211	ENSG00000258531	9736	*	7.95	8.9	8.53	9.2	6.8	207	287.7	472.22	485.2	378.66	363.12	632.84	545.63	117	105.59	0.95	0.00225	0.0555	0.58	0.0799	0.302	1.25	0.000144	0.0084	1.54	1.74e-06	1.54e-05	69403318	69403581	+	0	2762	TTS	ACTN1	39814	intron	0.012328	0.503749	NM_001130005, intron 1 of 20	Unchanged	Unchanged	Gain	Gain
KDM4A-AS1	chr1	44148472	44161048	ENSG00000236200	12577	*	7.58	8.53	8.27	8.96	6.39	168	215.78	383	355.1	286.99	330.75	537.06	456.3	87.35	80.83	0.94	0.00225	0.0555	0.69	0.0384	0.22	1.37	2.34e-05	0.00273	1.59	1.21e-06	1.12e-05	44165435	44173809	-	4	10675	TTS	KDM4A	16426	exon	0.011292	0.486562	NM_014663, exon 13 of 22	Unchanged	Unchanged	Gain	Gain
BOP1	chr8	145501529	145510686	ENSG00000170727	9158	*	6.62	7.62	7.21	8.09	6.94	104	93.29	178.45	215.82	140.3	155.51	291.62	253.11	138.64	106.31	1	0.00227	0.0556	0.58	0.0893	0.317	1.47	7.83e-06	0.00127	0.38	0.257	0.331	145486054	145515082	-	15	8974	TSS	HSF1	9172	intron	0.030253	0.581741	NM_015201, intron 2 of 15	Unchanged	Unchanged	Gain	Unchanged
SFRP5	chr10	99518753	99532485	ENSG00000120057	13733	*	7.21	8.18	8.06	7.97	6.69	130	165.22	260.1	319.13	208.06	325.23	252.28	247.86	117.8	88.84	0.97	0.0024	0.0557	0.85	0.0179	0.161	0.76	0.0202	0.14	0.94	0.00509	0.0145	99526507	99531709	-	2	888	TTS	ZFYVE27	4956	TTS	0.022722	0.563283	NM_003015	Unchanged	Unchanged	Unchanged	Unchanged
RP11-460I19.2	chr4	1017976	1025109	ENSG00000250259	7134	*	7.71	8.63	8.49	8.57	5.97	199	219.34	359.43	432.4	279.81	441.27	460.09	298.65	83.34	42.23	0.92	0.0024	0.0557	0.79	0.0249	0.184	0.86	0.0118	0.104	1.82	1.95e-06	1.7e-05	1021465	1022760	+	1	78	TSS	FGFRL1	864	TTS	0.041082	0.649376	NM_001004356	Unchanged	Unchanged	Unchanged	Gain
RNU6-1238P	chr11	67157450	67169917	ENSG00000253024	12468	*	8.48	9.48	9.15	9.18	6.43	281	431.55	638.89	789.03	499.04	634.67	613.17	549.14	96.17	75.73	1	0.00239	0.0557	0.67	0.0578	0.26	0.71	0.0374	0.193	2.19	2.06e-10	4.82e-09	67162680	67162782	-	0	902	TSS	RAD9A	2196	intron	0.039628	0.596856	NM_001243224, intron 5 of 7	Unchanged	Unchanged	Unchanged	Gain
MFAP2	chr1	17297500	17307449	ENSG00000117122	9950	*	7.39	8.36	7.82	7.71	5.46	142	192.99	300.51	358.16	204.08	248.66	240.31	178.67	52.09	35.68	0.98	0.00234	0.0557	0.43	0.207	0.465	0.32	0.354	0.614	2.18	3.23e-09	5.72e-08	17300996	17307330	-	8	1478	TTS	RP1-37C10.3	2946	intron	0.029956	0.610514	NM_002403, intron 6 of 8	Unchanged	Unchanged	Unchanged	Gain
TKT	chr3	53253990	53267286	ENSG00000163931	13297	*	8.48	9.4	8.93	9.4	6.57	321	395.24	672.56	676.53	427.29	545.47	704.68	643.73	108.99	81.56	0.91	0.00231	0.0557	0.44	0.183	0.44	0.91	0.00394	0.0567	2.1	1.78e-10	4.22e-09	53258722	53290047	-	14	1916	TTS	AC097015.1	16576	intron	0.016623	0.560319	NM_001258028, intron 14 of 14	Unchanged	Unchanged	Unchanged	Gain
RPL6	chr12	112843800	112848276	ENSG00000089009	4477	*	8.15	9.07	8.66	8.62	3.95	255	314.05	544.62	527.3	390.62	419.95	395.95	390.61	19.23	11.65	0.91	0.00231	0.0557	0.51	0.114	0.356	0.47	0.139	0.382	4.3	1.12e-26	1.22e-23	112844669	112856642	-	6	1369	TTS	PTPN11	10679	intron	0.022793	0.448168	NM_001320137, intron 3 of 6	Unchanged	Unchanged	Unchanged	Gain
DDX21	chr10	70715470	70717310	ENSG00000165732	1841	*	6.59	7.58	6.54	6.61	3.82	94	98.27	172.56	211.22	82.91	102.62	89.8	105.1	15.23	13.11	1	0.00245	0.0563	-0.05	0.886	0.942	0.02	0.959	0.983	2.92	1.23e-11	3.89e-10	70715883	70744829	+	14	507	TSS	RN7SL373P	9381	5' UTR	0.059815	0.534783	NM_001256910, exon 1 of 15	Unchanged	Unchanged	Unchanged	Gain
YBX3	chr12	10874023	10876753	ENSG00000060138	2731	*	7.05	7.99	7.47	7.45	4.64	124	141	260.94	247.19	143.49	211.56	194.13	155.02	28.85	21.12	0.94	0.00258	0.0582	0.42	0.235	0.495	0.4	0.239	0.501	2.55	5.76e-11	1.53e-09	10851682	10875906	-	9	518	TSS	RP13-81N3.2	27444	intron	0.059729	0.563736	NM_001145426, intron 1 of 8	Unchanged	Unchanged	Unchanged	Gain
TTC38	chr22	46681767	46693891	ENSG00000075234	12125	*	7.07	8.02	8.02	8.2	6.61	119	149.55	251.68	267.86	213.64	305.49	303.59	286.39	104.98	90.29	0.95	0.00265	0.0584	0.95	0.00681	0.108	1.14	0.000495	0.0177	1.05	0.00135	0.00485	46663860	46689905	+	13	2076	TTS	GTSE1	4808	intron	0.027633	0.572171	NM_017931, intron 13 of 13	Unchanged	Unchanged	Gain	Gain
DND1	chr5	140047095	140054734	ENSG00000256453	7640	*	7.59	8.56	8.5	8.52	5.06	154	230.73	355.22	400.25	331.63	392.33	377.99	358.21	34.46	32.04	0.97	0.00277	0.0598	0.91	0.0085	0.119	0.94	0.00546	0.0681	2.74	1.34e-13	6.63e-12	140050378	140053171	-	3	536	TTS	WDR55	1016	TTS	0.024352	0.539338	NM_017706	Unchanged	Unchanged	Unchanged	Gain
PRR14L	chr22	32105637	32112644	ENSG00000183530	7008	*	6.47	7.47	7.22	7.36	5.57	82	95.43	185.19	168.37	149.87	147.62	166.76	162.03	57.7	37.14	0.99	0.00278	0.0599	0.75	0.0327	0.207	0.89	0.00932	0.0915	1.36	0.000346	0.00153	32072733	32146120	-	8	36408	TTS	DEPDC5	40928	exon	0.014702	0.443985	NM_173566, exon 4 of 9	Unchanged	Unchanged	Unchanged	Gain
DHX15	chr4	24583968	24587067	ENSG00000109606	3100	*	6.89	7.86	6.29	6.65	3.99	103	133.88	239.06	224.23	60.59	96.31	129.99	70.94	20.03	11.65	0.97	0.00283	0.0604	-0.59	0.124	0.37	-0.24	0.543	0.759	2.94	1.25e-11	3.94e-10	24529097	24586173	-	13	656	TSS	RN7SL16P	20434	intron	0.046159	0.509842	NM_001358, intron 1 of 13	Unchanged	Unchanged	Unchanged	Gain
SPARC	chr5	151041205	151048778	ENSG00000113140	7574	*	7.04	7.96	7.74	7.75	5.65	128	135.31	243.27	254.08	213.64	213.92	216.36	212.82	55.3	45.15	0.92	0.00303	0.0627	0.7	0.0327	0.207	0.7	0.0291	0.169	1.69	1.86e-06	1.63e-05	151040656	151066726	-	9	4336	TTS	CTB-113P19.4	9982	intron	0.011358	0.498878	NM_001309444, intron 8 of 9	Unchanged	Unchanged	Unchanged	Gain
UPF1	chr19	18960062	18983182	ENSG00000005007	23121	*	8.63	9.59	9.62	9.94	6.77	322	470.72	696.97	844.9	663.26	905.43	1100.63	863.56	125.82	92.48	0.96	0.00306	0.0629	0.98	0.00571	0.101	1.31	0.000147	0.00853	2.03	2.4e-09	4.36e-08	18942746	18979045	+	23	7423	TTS	GDF1	7738	intron	0.037329	0.583478	NM_001297549, intron 16 of 23	Unchanged	Unchanged	Gain	Gain
IZUMO1	chr19	49241893	49253009	ENSG00000182264	11117	*	7.5	8.5	8.01	7.4	6.25	137	225.04	344.28	377.3	242.34	273.13	173.6	163.78	77.73	75	1	0.00311	0.0631	0.51	0.156	0.409	-0.1	0.765	0.891	1.53	1.06e-05	7.48e-05	49244144	49250166	-	9	2715	TSS	RASIP1	3473	non-coding	0.036887	0.557035	NR_135832, exon 4 of 9	Unchanged	Unchanged	Unchanged	Gain
SNORD99	chr1	28900998	28910242	ENSG00000221539	9245	*	8.66	9.57	9.46	8.97	5.8	364	443.66	832.5	683.42	790.8	615.72	448.12	557.9	65.71	45.87	0.91	0.00311	0.0631	0.8	0.0166	0.156	0.32	0.326	0.588	2.96	5.9e-18	8.41e-16	28905260	28905334	-	0	286	TSS	SNHG12	568	promoter-TSS	0.027047	0.494916	NR_003077	Unchanged	Unchanged	Unchanged	Gain
RP11-244B22.11	chr16	34374515	34388351	ENSG00000261800	13837	*	8.27	9.25	9.38	9.12	6.27	231	384.55	583.34	638.26	623.4	711.24	631.99	483.45	88.95	65.54	0.99	0.00312	0.0632	1.12	0.00181	0.0585	0.86	0.0164	0.124	2.22	3.58e-10	7.95e-09	34378092	34379252	+	1	2181	TTS	RP11-244B22.13	2394	Intergenic	0.020455	0.556808		Unchanged	Gain	Unchanged	Gain
MIR17HG	chr13	91998986	92001806	ENSG00000215417	2821	*	8.05	9.03	8.52	8.36	4.48	201	328.29	498.32	545.66	277.42	454.69	372.01	286.39	26.45	18.2	0.98	0.00316	0.0639	0.47	0.222	0.481	0.31	0.379	0.633	3.6	5.82e-19	1.06e-16	92000073	92006833	+	3	323	TSS	GPC5	50532	intron	0.10784	0.662057	NR_027350, intron 1 of 1	Unchanged	Unchanged	Unchanged	Gain
DBF4B	chr17	42823911	42831850	ENSG00000161692	7940	*	6.95	7.87	7.77	7.45	5.68	124	123.2	229.8	237.24	198.5	237.61	208.67	141.88	60.1	42.23	0.92	0.00318	0.064	0.82	0.0138	0.144	0.5	0.149	0.396	1.64	6.29e-06	4.76e-05	42785975	42829632	+	14	1752	TTS	ADAM11	8518	TTS	0.016503	0.570601	NR_036623	Unchanged	Unchanged	Unchanged	Gain
NCLN	chr19	3203041	3211876	ENSG00000125912	8836	*	7.93	8.91	8.72	8.95	5.41	200	287.7	402.36	558.67	353.95	491.79	572.12	417.77	45.68	39.32	0.98	0.00321	0.064	0.79	0.0243	0.182	1.02	0.00304	0.0488	2.64	1.6e-13	7.83e-12	3185597	3209568	+	14	2110	TTS	CELF5	17242	exon	0.034978	0.621279	NM_001321463, exon 14 of 15	Unchanged	Unchanged	Gain	Gain
AL136376.1	chr1	116914545	116918550	ENSG00000269279	4006	*	6.69	7.64	6.76	6.68	5.38	99	107.53	191.08	207.4	89.28	127.88	120.58	84.95	52.09	31.31	0.95	0.00321	0.064	0.07	0.846	0.922	-0.01	0.983	0.992	1.61	3.37e-05	0.000206	116915889	116926718	-	1	658	TTS	ATP1A1	666	promoter-TSS	0.052697	0.571785	NM_001160233	Unchanged	Unchanged	Unchanged	Gain
CSRP1	chr1	201448616	201455663	ENSG00000159176	7048	*	7.14	8.07	7.61	8.23	5.64	129	153.82	250	287.75	177.77	212.34	304.45	295.15	56.9	42.96	0.93	0.0032	0.064	0.46	0.17	0.425	1.08	0.000742	0.0222	1.75	9.45e-07	9.02e-06	201452657	201478584	-	6	518	TTS	PHLDA3	13828	TTS	0.019869	0.542217	NM_001193571	Unchanged	Unchanged	Gain	Gain
SLC7A6	chr16	68326821	68335449	ENSG00000103064	8629	*	7.37	8.3	8.06	8.47	5.65	148	183.73	342.59	286.22	243.94	288.13	381.42	325.8	56.9	43.69	0.92	0.00335	0.0653	0.68	0.0407	0.224	1.09	0.000761	0.0225	2.1	2.12e-09	3.9e-08	68298432	68335722	+	11	4587	TTS	SLC7A6OS	6899	TTS	0.012171	0.467548	NM_032178	Unchanged	Unchanged	Gain	Gain
PMEPA1	chr20	56224664	56245530	ENSG00000124225	20867	*	8.54	9.46	9.37	9.16	7.52	313	433.69	688.56	718.62	586.73	734.92	705.53	441.41	203.55	163.11	0.91	0.00333	0.0653	0.82	0.016	0.154	0.62	0.0832	0.294	1.34	3.18e-05	0.000196	56223453	56286541	-	4	11644	TTS	ZBP1	39465	intron	0.028996	0.56858	NM_199171, intron 1 of 3	Unchanged	Unchanged	Unchanged	Gain
CCDC24	chr1	44459694	44465000	ENSG00000159214	5307	*	6.97	7.97	7.52	7.22	5.45	101	150.26	222.22	279.34	144.29	221.82	174.46	123.49	51.29	36.41	1	0.00341	0.0655	0.54	0.152	0.405	0.25	0.512	0.738	1.75	3.99e-06	3.19e-05	44457030	44462196	+	8	151	TTS	SLC6A9	4845	TTS	0.020735	0.584621	NM_001349127	Unchanged	Unchanged	Unchanged	Gain
ASS1	chr9	133319182	133329600	ENSG00000130707	10419	*	6.86	7.8	6.94	6.92	6.17	106	126.76	216.33	228.83	102.04	143.67	146.24	96.34	80.94	63.35	0.94	0.00343	0.0655	0.08	0.835	0.916	0.06	0.875	0.944	1.11	0.00141	0.00503	133320315	133376661	+	15	4076	TSS	HMCN2	29422	intron	0.027263	0.588789	NM_054012, intron 1 of 14	Unchanged	Unchanged	Unchanged	Gain
HDAC1	chr1	32792774	32805188	ENSG00000116478	12415	*	9.02	9.99	9.5	9.73	6.52	407	633.8	994.95	1041.58	609.05	840.7	791.91	909.97	101.77	81.56	0.97	0.00344	0.0655	0.48	0.191	0.446	0.71	0.0405	0.202	2.65	1.45e-14	9.01e-13	32757686	32799236	+	13	255	TTS	MARCKSL1	451	TTS	0.02731	0.55663	NM_023009	Unchanged	Unchanged	Unchanged	Gain
PDAP1	chr7	99001261	99020440	ENSG00000106244	19180	*	8.93	9.88	9.46	9.66	6.8	389	587.51	966.34	922.96	648.91	758.6	891.11	728.68	115.4	107.04	0.95	0.00345	0.0655	0.53	0.131	0.379	0.73	0.0342	0.185	2.31	3.77e-12	1.36e-10	98992585	99006452	-	5	4398	TSS	BUD31	4588	intron	0.023777	0.498775	NM_003910, intron 3 of 5	Unchanged	Unchanged	Unchanged	Gain
CLPTM1L	chr5	1318174	1336990	ENSG00000049656	18817	*	8.52	9.46	9.4	10.24	7.47	304	432.27	640.58	765.31	664.05	689.92	1263.12	1147.32	192.33	162.38	0.93	0.00347	0.0656	0.88	0.00911	0.121	1.71	3.82e-07	0.000169	1.35	2.68e-05	0.000169	1317858	1345214	-	16	9724	TTS	MIR4457	18090	intron	0.026893	0.566805	NM_030782, intron 9 of 16	Unchanged	Unchanged	Gain	Gain
JRK	chr8	143760247	143764337	ENSG00000234616	4091	*	7.97	7	8.23	8.5	6.08	205	296.96	116.16	139.29	260.68	341.8	401.94	324.05	73.73	61.89	-0.97	0.00351	0.0658	0.26	0.453	0.678	0.53	0.116	0.348	2.07	1.83e-09	3.43e-08	143747833	143763386	-	3	1094	TSS	PSCA	1425	intron	0.024211	0.609535	NM_005672, intron 1 of 2	Unchanged	Unchanged	Unchanged	Gain
POC1A	chr3	52153555	52163365	ENSG00000164087	9811	*	7.07	8.02	7.76	8.04	6.21	113	155.96	248.32	270.92	215.24	218.66	278.79	246.98	88.95	58.98	0.95	0.0035	0.0658	0.69	0.0443	0.232	0.97	0.00411	0.058	1.23	0.000631	0.00255	52109301	52188706	-	10	30246	TSS	LINC00696	60893	intron	0.012743	0.509174	NM_001161581, intron 8 of 10	Unchanged	Unchanged	Unchanged	Gain
AC007163.6	chr2	201675569	201678116	ENSG00000230408	2548	*	7.42	8.4	7.32	7.56	4.49	135	207.94	301.35	374.23	133.93	184.72	231.76	145.39	21.64	23.3	0.98	0.00353	0.0659	-0.11	0.764	0.878	0.14	0.72	0.865	3.01	4.62e-14	2.53e-12	201645217	201676893	-	3	50	TSS	BZW1	574	promoter-TSS	0.064022	0.574009	NR_110275	Unchanged	Unchanged	Unchanged	Gain
MIEF1	chr22	39905321	39913443	ENSG00000100335	8123	*	6.93	7.91	8.04	8.09	5.91	98	146.7	244.95	236.48	256.69	269.97	295.9	249.61	68.92	50.97	0.98	0.00359	0.0665	1.11	0.00153	0.0536	1.16	0.000871	0.0242	1.41	9.83e-05	0.000521	39898357	39914137	+	6	4755	TTS	ATF4	6317	intron	0.019579	0.489288	NM_019008, intron 5 of 5	Unchanged	Gain	Gain	Gain
PAK4	chr19	39615723	39622903	ENSG00000130669	7181	*	7.2	8.15	6.98	7.99	5.45	119	174.47	292.93	275.51	84.5	168.14	295.9	211.95	48.08	39.32	0.95	0.00361	0.0666	-0.22	0.59	0.773	0.79	0.0261	0.16	2.02	3.09e-08	4.31e-07	39616473	39673456	+	10	2840	TSS	CTC-218B8.3	6208	intron	0.029252	0.566852	NM_001014832, intron 1 of 8	Unchanged	Unchanged	Unchanged	Gain
ACAP1	chr17	7248474	7256704	ENSG00000072818	8231	*	8.13	9.06	7.92	8.55	5.69	225	336.13	509.26	560.97	209.66	274.71	412.2	336.31	65.71	37.87	0.93	0.00367	0.0671	-0.21	0.541	0.74	0.42	0.224	0.484	2.51	3.86e-11	1.08e-09	7239847	7254797	+	21	2208	TTS	KCTD11	2618	intron	0.041196	0.597084	NM_014716, intron 18 of 21	Unchanged	Unchanged	Unchanged	Gain
ERRFI1	chr1	8084400	8088031	ENSG00000116285	3632	*	6.19	7.19	6.68	6.65	4.19	67	79.05	143.1	149.23	94.07	111.3	112.03	89.33	25.64	10.92	1	0.00367	0.0671	0.49	0.188	0.444	0.46	0.215	0.475	2.24	1.02e-06	9.63e-06	8064463	8086343	-	3	128	TSS	RP11-431K24.1	582	intron	0.059504	0.543376	NM_018948, intron 1 of 3	Unchanged	Unchanged	Unchanged	Gain
NUFIP2	chr17	27591755	27597059	ENSG00000108256	5305	*	6.56	7.52	7.47	8.42	4.93	104	84.74	196.13	171.43	169	185.51	384.84	301.28	28.05	32.77	0.96	0.00369	0.0671	0.91	0.00812	0.117	1.86	2.85e-08	2.67e-05	2.02	1.72e-07	1.99e-06	27582853	27621136	-	3	11554	TTS	CRYBA1	12906	intron	0.017349	0.423643	NM_020772, intron 3 of 3	Unchanged	Unchanged	Gain	Gain
MUM1	chr19	1376374	1380305	ENSG00000160953	3932	*	6.5	7.48	7.6	7.53	4.32	81	100.41	169.19	186.73	192.92	194.19	206.1	162.9	21.64	18.2	0.97	0.00371	0.0673	1.09	0.00149	0.0532	1.02	0.00337	0.052	2.31	2.76e-08	3.89e-07	1285889	1378430	+	13	90	TTS	AC004623.2	820	TTS	0.04173	0.601882	NM_032853	Unchanged	Gain	Gain	Gain
AC010525.4	chr19	56199155	56209341	ENSG00000267117	10187	*	6.83	7.79	7.44	8	6.17	95	133.17	223.91	218.88	121.97	224.98	309.58	202.31	86.55	57.53	0.96	0.00394	0.0691	0.6	0.128	0.375	1.17	0.00135	0.0305	1.04	0.00453	0.0132	56205483	56205924	-	0	1235	TTS	EPN1	2884	intron	0.034266	0.624092	NM_013333, intron 7 of 9	Unchanged	Unchanged	Gain	Gain
HIC2	chr22	21789536	21806004	ENSG00000169635	16469	*	8.71	9.67	9.45	10.01	6.62	326	512.74	737.38	896.94	553.24	846.22	1163.92	896.84	103.38	93.21	0.96	0.00395	0.0692	0.74	0.0484	0.241	1.3	0.000264	0.0121	2.26	2.28e-11	6.77e-10	21771692	21805752	+	2	7982	TTS	TMEM191C	23909	intron	0.026477	0.589507	NM_015094, intron 2 of 2	Unchanged	Unchanged	Gain	Gain
CSRNP1	chr3	39177982	39187153	ENSG00000144655	9172	*	8.2	9.18	8.06	8.59	5.79	214	373.16	595.96	560.2	235.17	296.81	436.15	337.19	65.71	45.15	0.98	0.00408	0.07	-0.14	0.692	0.836	0.4	0.275	0.539	2.57	5.77e-12	1.98e-10	39183828	39196053	-	4	1260	TTS	TTC21A	2174	TTS	0.015049	0.539309	NM_033027	Unchanged	Unchanged	Unchanged	Gain
ATL2	chr2	38602921	38605493	ENSG00000119787	2573	*	7.08	8.02	7.44	7.41	4.64	116	154.53	232.32	286.99	153.86	193.4	208.67	132.25	28.85	21.12	0.94	0.00407	0.07	0.36	0.307	0.561	0.33	0.366	0.623	2.62	2.49e-11	7.29e-10	38522021	38604404	-	13	197	TSS	AC016995.3	29662	promoter-TSS	0.068845	0.572706	NM_001308076	Unchanged	Unchanged	Unchanged	Gain
POLD2	chr7	44146010	44163980	ENSG00000106628	17971	*	9.39	10.4	10.07	10.37	7.59	500	844.59	1297.99	1396.68	935.89	1207.76	1455.54	1188.48	222.78	162.38	1	0.00412	0.0702	0.67	0.0752	0.293	0.98	0.00807	0.0846	1.99	2.03e-08	2.96e-07	44154285	44163107	-	11	710	TTS	AEBP1	836	TTS	0.027436	0.587813	NM_001129	Unchanged	Unchanged	Unchanged	Gain
CTDSP2	chr12	58236383	58242112	ENSG00000175215	5730	*	7.29	8.3	8.3	8.12	5.35	113	200.82	296.3	332.91	278.22	352.86	303.59	252.24	50.49	31.31	1	0.00417	0.0706	1.01	0.00684	0.108	0.82	0.0244	0.154	2.1	1.79e-07	2.06e-06	58213709	58240522	-	7	1274	TSS	RP11-620J15.1	2720	intron	0.048883	0.583348	NM_005730, intron 1 of 7	Unchanged	Unchanged	Unchanged	Gain
DHCR24	chr1	55310800	55322922	ENSG00000116133	12123	*	6.92	7.83	7.5	8.01	6.1	127	114.65	205.39	250.25	166.61	195.77	274.52	240.85	64.91	72.09	0.91	0.00417	0.0706	0.58	0.0822	0.306	1.09	0.000752	0.0224	1.27	0.000221	0.00105	55315305	55352891	-	8	1556	TTS	C1orf177	8936	3' UTR	0.013613	0.507342	NM_014762, exon 9 of 9	Unchanged	Unchanged	Gain	Gain
MIR4635	chr5	1049385	1069914	ENSG00000263834	20530	*	8.35	9.31	8.98	9.39	7.52	254	399.51	551.35	720.92	466.35	547.04	783.36	557.02	206.76	160.2	0.96	0.00428	0.0712	0.63	0.0713	0.286	1.04	0.0037	0.0547	1.14	0.000638	0.00258	1063010	1063089	-	0	3360	TTS	SLC12A7	9152	intron	0.044963	0.615373	NM_006598, intron 21 of 23	Unchanged	Unchanged	Gain	Gain
RP11-545N8.3	chr12	57544517	57554467	ENSG00000259125	9951	*	7.1	8.07	7.59	8.21	6	109	165.22	240.74	295.41	145.88	239.97	282.21	311.79	66.51	61.89	0.97	0.00428	0.0712	0.49	0.201	0.458	1.12	0.00118	0.0282	1.49	2.08e-05	0.000135	57538402	57541402	-	1	8090	TSS	LRP1	27211	intron	0.013971	0.532965	NM_002332, intron 8 of 88	Unchanged	Unchanged	Gain	Gain
PPAPDC1B	chr8	38124542	38127726	ENSG00000147535	3185	*	6.61	7.53	7.37	7.36	4.2	95	99.7	190.24	179.85	143.49	186.3	165.05	163.78	20.03	16.75	0.93	0.00426	0.0712	0.76	0.0298	0.198	0.76	0.0245	0.154	2.63	1.67e-10	3.99e-09	38120647	38126738	-	6	604	TSS	WHSC1L1	1080	intron	0.038957	0.509108	NR_148893, intron 2 of 7	Unchanged	Unchanged	Unchanged	Gain
TSKU	chr11	76492269	76500065	ENSG00000182704	7797	*	7.17	8.15	7.93	7.88	6.31	109	178.03	255.05	314.54	219.22	269.97	250.57	220.71	92.96	65.54	0.99	0.00425	0.0712	0.77	0.0347	0.211	0.72	0.0449	0.213	1.25	0.000536	0.00222	76494282	76509198	+	1	1885	TSS	RP11-21L23.3	2061	intron	0.031559	0.56452	NM_001318478, intron 1 of 1	Unchanged	Unchanged	Unchanged	Gain
SMAD6	chr15	67042585	67048293	ENSG00000137834	5709	*	7.2	6.23	6.37	6.77	5.69	145	148.12	75.76	74.23	85.3	80.52	113.74	104.22	52.09	50.97	-0.97	0.00427	0.0712	-0.82	0.0179	0.161	-0.43	0.204	0.464	1.83	1.19e-07	1.42e-06	66994565	67074338	+	4	28899	TTS	RP11-622C24.1	55302	intron	0.01139	0.512263	NR_027654, intron 4 of 4	Unchanged	Unchanged	Unchanged	Gain
CREBBP	chr16	3928914	3932338	ENSG00000005339	3425	*	7.62	8.51	8.29	8.31	4.63	169	223.61	341.75	387.24	277.42	349.7	378.85	256.61	23.24	26.21	0.89	0.00434	0.0714	0.68	0.0463	0.237	0.69	0.0456	0.214	3.09	4.12e-16	3.71e-14	3775054	3930727	-	30	101	TSS	RP11-95J11.1	39615	promoter-TSS	0.09407	0.645152	NM_001079846	Unchanged	Unchanged	Unchanged	Gain
HOXB9	chr17	46698878	46707017	ENSG00000170689	8140	*	8.75	9.75	9.49	9.15	6.21	301	558.31	867.01	857.14	591.51	848.59	605.48	528.12	82.54	65.54	1	0.00437	0.0714	0.74	0.0555	0.256	0.4	0.277	0.54	2.66	4.57e-13	2e-11	46698517	46703839	-	1	892	TSS	HOXB-AS4	3088	intron	0.036004	0.556457	NM_024017, intron 1 of 1	Unchanged	Unchanged	Unchanged	Gain
AC004824.1	chr1	17730448	17744577	ENSG00000266727	14130	*	8.02	8.95	9.05	9.02	6	202	316.19	478.12	508.93	499.83	559.68	571.27	465.06	66.51	61.89	0.93	0.00435	0.0714	1.03	0.00304	0.0755	1	0.00383	0.0559	2.18	3.6e-10	7.99e-09	17740126	17740190	-	0	2614	TTS	RP1-20B21.4	3634	intron	0.021164	0.518791	NM_018715, intron 11 of 12	Unchanged	Gain	Unchanged	Gain
ZNF697	chr1	120163126	120169208	ENSG00000143067	6083	*	7.67	8.61	8.09	8.81	5.51	155	251.38	385.52	397.19	247.13	298.39	501.14	399.37	47.28	43.69	0.95	0.00444	0.0719	0.42	0.238	0.497	1.15	0.00111	0.0274	2.36	9.35e-11	2.36e-09	120162044	120190396	-	2	4123	TTS	HSD3BP5	14294	exon	0.032889	0.515949	NM_001080470, exon 3 of 3	Unchanged	Unchanged	Gain	Gain
C22orf39	chr22	19426892	19437893	ENSG00000242259	11002	*	8.49	9.48	9.39	9.24	6.86	254	463.6	722.23	702.55	600.28	741.23	621.72	585.05	123.41	109.23	0.99	0.00444	0.0719	0.9	0.0161	0.154	0.75	0.0382	0.196	1.86	8.48e-08	1.06e-06	19338890	19435214	-	23	2822	TSS	HIRA	2832	intron	0.019455	0.480865	NM_173793, intron 2 of 2	Unchanged	Unchanged	Unchanged	Gain
SAMD4A	chr14	55031617	55037202	ENSG00000020577	5586	*	7.82	8.82	8.59	8.56	6.18	160	291.98	405.73	500.51	334.82	433.37	413.91	339.82	78.54	66.26	1	0.00445	0.0719	0.77	0.0417	0.226	0.74	0.0442	0.211	1.86	2.95e-07	3.2e-06	55034329	55260029	+	12	80	TSS	CGRRF1	28842	promoter-TSS	0.064291	0.587466	NM_015589	Unchanged	Unchanged	Unchanged	Gain
RAN	chr12	131355379	131358431	ENSG00000132341	3053	*	7.77	8.67	8.47	8.4	4.65	182	254.23	375.42	441.58	322.06	385.22	373.72	303.03	29.65	20.39	0.91	0.00443	0.0719	0.7	0.04	0.223	0.63	0.0592	0.247	3.18	2.95e-16	2.73e-14	131356423	131362223	+	7	482	TSS	RNU6-1077P	2523	intron	0.072763	0.573394	NM_001300797, intron 1 of 5	Unchanged	Unchanged	Unchanged	Gain
NASP	chr1	46049197	46061738	ENSG00000132780	12542	*	8.54	9.4	8.82	8.64	6.36	343	402.36	734.01	616.07	472.73	430.22	427.6	369.6	95.36	69.18	0.86	0.00458	0.0731	0.28	0.388	0.629	0.1	0.76	0.888	2.4	4.68e-13	2.04e-11	46049731	46084566	+	15	5736	TSS	AKR1A1	19746	intron	0.022648	0.459373	NM_152298, intron 1 of 13	Unchanged	Unchanged	Unchanged	Gain
CTA-397H3.3	chr8	56985423	56989381	ENSG00000253603	3959	*	8.49	9.36	9.16	9.05	4.24	308	408.77	622.06	690.31	507.8	636.25	584.1	478.2	23.24	14.56	0.87	0.00463	0.0736	0.67	0.0453	0.234	0.57	0.0831	0.294	4.3	4.52e-28	6.41e-25	56987150	56987833	+	1	252	TSS	RPS20	334	promoter-TSS	0.036138	0.458818	NM_001023	Unchanged	Unchanged	Unchanged	Gain
TLE3	chr15	70338770	70348497	ENSG00000140332	9728	*	7.62	8.53	8.12	8.68	6.3	161	232.87	356.06	381.12	272.64	284.18	448.12	371.35	85.75	72.09	0.9	0.00471	0.0739	0.5	0.143	0.395	1.06	0.00172	0.0349	1.65	1.17e-06	1.09e-05	70340128	70390515	-	19	3506	TTS	MIR629	28076	intron	0.020563	0.538707	NM_001282981, intron 19 of 19	Unchanged	Unchanged	Gain	Gain
STRN4	chr19	47255193	47262808	ENSG00000090372	7616	*	6.62	7.61	6.9	7.41	5.37	78	118.93	212.12	179.08	89.28	149.19	208.67	131.37	38.47	44.42	0.99	0.0047	0.0739	0.28	0.499	0.71	0.79	0.0409	0.202	1.5	8.2e-05	0.000445	47222767	47250138	-	18	8862	TSS	FKRP	9688	exon	0.037825	0.542745	NM_024301, exon 4 of 4	Unchanged	Unchanged	Unchanged	Gain
AC104698.1	chr2	30474540	30484132	ENSG00000256261	9593	*	6.9	7.83	7.19	7.37	6.11	102	136.73	212.12	242.6	144.29	148.4	187.29	142.76	64.91	72.82	0.93	0.00471	0.0739	0.29	0.406	0.643	0.47	0.188	0.446	1.28	0.000209	0.000996	30481192	30482893	+	1	1856	TSS	LBH	24934	intron	0.014076	0.489992	NM_030915, intron 2 of 2	Unchanged	Unchanged	Unchanged	Gain
HN1L	chr16	1726892	1730797	ENSG00000206053	3906	*	6.8	7.78	7.2	7.06	4.98	87	135.31	196.13	244.9	126.75	167.35	153.93	112.98	36.06	26.94	0.99	0.00468	0.0739	0.4	0.287	0.542	0.26	0.49	0.722	2.03	3.12e-07	3.37e-06	1728256	1752087	+	5	588	TSS	CRAMP1L	936	TTS	0.053791	0.552625	NM_020825	Unchanged	Unchanged	Unchanged	Gain
SNRNP200	chr2	96941595	96958992	ENSG00000144028	17398	*	8.05	8.97	9.02	9.39	7.11	207	324.73	498.32	507.4	467.95	567.57	653.37	686.64	141.04	136.17	0.92	0.00475	0.0743	0.96	0.00629	0.105	1.33	8.95e-05	0.00628	1.35	3.08e-05	0.000191	96940076	96971297	-	44	10218	TTS	CIAO1	11206	exon	0.018797	0.497442	NM_014014, exon 31 of 45	Unchanged	Unchanged	Gain	Gain
RP1-149A16.3	chr22	32777473	32784251	ENSG00000230736	6779	*	7.16	8.15	8.29	8.51	5.57	108	177.32	244.95	321.43	284.59	342.59	316.42	411.63	49.69	45.15	0.99	0.00478	0.0747	1.14	0.00162	0.0547	1.35	0.000163	0.00913	1.83	8.41e-07	8.14e-06	32772650	32780330	+	2	532	TTS	RP1-149A16.17	756	TTS	0.014018	0.479492	NR_038918	Unchanged	Gain	Gain	Gain
PPM1M	chr3	52276935	52286007	ENSG00000164088	9073	*	7.47	8.32	8.45	7.84	6.11	172	183.02	323.23	315.31	299.74	397.85	229.19	227.71	72.12	66.26	0.85	0.00479	0.0748	0.97	0.0033	0.0784	0.36	0.251	0.513	1.63	9.98e-07	9.47e-06	52279913	52284611	+	9	1558	TSS	RP5-1157M23.2	6358	intron	0.023592	0.551918	NM_144641, intron 3 of 9	Unchanged	Unchanged	Unchanged	Gain
CCDC167	chr6	37439353	37460935	ENSG00000198937	21583	*	8.66	9.54	9.21	9.49	7.08	343	465.74	774.41	710.2	516.57	663.87	798.75	637.6	139.44	131.07	0.88	0.00482	0.0748	0.55	0.11	0.35	0.83	0.0128	0.108	1.82	1.12e-08	1.76e-07	37450695	37467698	-	3	551	TTS	CMTR1	862	TTS	0.013901	0.537346	NM_015050	Unchanged	Unchanged	Unchanged	Gain
DYRK1B	chr19	40313579	40325172	ENSG00000105204	11594	*	7.35	8.26	8.28	8.56	6.1	133	193.7	308.08	306.89	256.69	366.28	419.9	335.44	72.93	64.08	0.91	0.00485	0.0752	0.93	0.00952	0.122	1.21	0.000402	0.0156	1.51	1.4e-05	9.54e-05	40315989	40324841	-	11	3386	TTS	FBL	5722	TTS	0.03028	0.56353	NR_106777	Unchanged	Unchanged	Gain	Gain
MRPL40	chr22	19417115	19421902	ENSG00000185608	4788	*	7.42	8.38	8.43	8.66	6.04	130	213.64	306.4	361.22	281.41	408.11	425.03	381.86	79.34	52.43	0.96	0.0049	0.0756	1	0.00696	0.11	1.23	0.000419	0.0159	1.63	1.12e-05	7.86e-05	19419424	19423598	+	3	84	TSS	C22orf39	15706	promoter-TSS	0.056415	0.558805	NM_003776	Unchanged	Unchanged	Gain	Gain
CNNM3	chr2	97480974	97487738	ENSG00000168763	6765	*	6.65	7.59	7.67	7.26	5.85	86	115.37	189.39	196.68	185.74	222.61	165.05	141.88	66.51	48.79	0.94	0.00498	0.0764	1.02	0.00366	0.0824	0.61	0.0856	0.298	1.1	0.00286	0.00903	97481981	97499648	+	7	2375	TSS	RP11-353K11.1	4962	intron	0.047316	0.565642	NM_199078, intron 1 of 6	Unchanged	Gain	Unchanged	Gain
SCYL1	chr11	65295288	65311772	ENSG00000142186	16485	*	8.15	9.09	8.99	9.42	6.75	216	353.93	505.05	587.75	403.37	610.2	724.35	643.73	117	98.3	0.94	0.00498	0.0764	0.83	0.0266	0.189	1.26	0.000281	0.0125	1.69	5.91e-07	5.95e-06	65292547	65306175	+	17	2645	TTS	LTBP3	3351	exon	0.031487	0.587539	NM_001048218, exon 11 of 18	Unchanged	Unchanged	Gain	Gain
COL27A1	chr9	117023554	117036139	ENSG00000196739	12586	*	6.84	7.81	7.76	7.89	5.9	88	141	226.43	221.94	220.82	213.13	270.24	204.94	68.12	50.97	0.97	0.00501	0.0766	0.92	0.0105	0.127	1.05	0.00382	0.0559	1.22	0.00102	0.00385	116917839	117074791	+	60	44944	TTS	ORM1	55488	intron	0.017085	0.558681	NM_032888, intron 34 of 60	Unchanged	Unchanged	Gain	Gain
NELFB	chr9	140161424	140177065	ENSG00000188986	15642	*	8.58	9.59	9.61	9.82	6.78	288	479.98	614.48	925.25	609.84	958.32	1052.74	754.95	128.22	91.02	1	0.00501	0.0766	1.03	0.00735	0.112	1.24	0.000747	0.0223	1.96	3.82e-08	5.21e-07	140149624	140167998	+	12	1246	TTS	TOR4A	2956	Intergenic	0.046547	0.622019		Unchanged	Unchanged	Gain	Gain
NME1	chr17	49232585	49247987	ENSG00000239672	15403	*	8.48	9.37	9.1	9.37	6.7	293	420.87	617.01	707.91	504.62	590.46	704.68	621.83	115.4	93.21	0.89	0.00502	0.0766	0.62	0.0699	0.283	0.89	0.00714	0.079	2.02	1.05e-09	2.09e-08	49230941	49239789	+	5	497	TTS	NME1-NME2	8818	TTS	0.024609	0.493897	NM_198175	Unchanged	Unchanged	Unchanged	Gain
CROCCP2	chr1	16944532	16951156	ENSG00000215908	6625	*	6.45	7.4	6.98	7.21	6.36	93	81.9	148.15	189.8	117.19	134.99	167.62	128.75	91.36	72.82	0.95	0.00506	0.0771	0.53	0.135	0.384	0.76	0.0308	0.174	0.72	0.0414	0.078	16944756	16961054	-	7	3088	TTS	RP5-1182A14.5	3620	intron	0.020685	0.547554	NR_026752, intron 5 of 6	Unchanged	Unchanged	Unchanged	Unchanged
VAV2	chr9	136790179	136802564	ENSG00000160293	12386	*	7.03	7.98	7.73	8.16	6.41	101	160.23	245.79	259.44	193.72	232.08	323.26	249.61	97.77	72.09	0.95	0.00514	0.0776	0.7	0.052	0.249	1.13	0.00153	0.0327	1.04	0.00346	0.0106	136627015	136857726	-	29	61354	TSS	LINC00094	97788	intron	0.022691	0.557852	NM_001134398, intron 2 of 29	Unchanged	Unchanged	Gain	Gain
FAM96B	chr16	66965033	66970340	ENSG00000166595	5308	*	5.99	6.99	6.21	7.03	5.43	59	68.37	117	137.75	56.6	91.57	153.08	107.73	45.68	40.78	1	0.00515	0.0776	0.22	0.601	0.78	1.03	0.00594	0.0715	0.88	0.0211	0.0457	66965958	66968303	-	5	616	TSS	CES2	676	promoter-TSS	0.037316	0.562465	NM_003869	Unchanged	Unchanged	Gain	Unchanged
TBKBP1	chr17	45765593	45775253	ENSG00000198933	9661	*	6.69	7.69	7.37	8	6.09	76	130.32	215.49	197.45	151.46	179.19	256.56	255.74	80.94	55.34	1	0.00519	0.0779	0.68	0.0738	0.29	1.31	0.000283	0.0125	1.05	0.00483	0.0139	45772629	45789416	+	8	2206	TSS	KPNB1	7552	Intergenic	0.033026	0.563872		Unchanged	Unchanged	Gain	Gain
AHCYL1	chr1	110525421	110528876	ENSG00000168710	3456	*	6.86	7.76	7.31	7.13	5.1	103	128.9	212.96	220.41	133.93	183.14	171.04	109.48	42.47	26.21	0.9	0.00522	0.078	0.45	0.209	0.466	0.27	0.46	0.699	1.93	8.42e-07	8.15e-06	110527307	110566357	+	16	158	TSS	CSF1	53534	promoter-TSS	0.037058	0.544139	NM_006621	Unchanged	Unchanged	Unchanged	Gain
PTK2	chr8	142009908	142012674	ENSG00000169398	2767	*	6.85	7.81	6.5	7.24	5.42	97	133.17	188.55	259.44	56.6	123.93	176.17	126.99	50.49	34.95	0.96	0.00521	0.078	-0.35	0.407	0.644	0.4	0.276	0.539	1.63	1.89e-05	0.000124	141667998	142011332	-	32	41	TSS	RP11-128L5.1	54097	promoter-TSS	0.080651	0.616414	NM_001352735	Unchanged	Unchanged	Unchanged	Gain
IQSEC1	chr3	13002141	13012028	ENSG00000144711	9888	*	7.39	8.3	8.11	8.26	6.1	134	201.53	308.92	322.96	241.55	309.44	310.43	304.78	76.13	61.17	0.91	0.00525	0.0782	0.72	0.0436	0.231	0.87	0.00998	0.0946	1.67	1.6e-06	1.43e-05	12942347	13114617	-	13	64738	TTS	RP11-767C1.1	80374	intron	0.020231	0.533023	NM_001134382, intron 1 of 14	Unchanged	Unchanged	Unchanged	Gain
KPNA4	chr3	160281777	160284939	ENSG00000186432	3163	*	7.4	8.34	7.49	7.45	4.48	128	209.37	304.72	344.39	131.53	228.92	190.71	158.52	24.84	19.66	0.94	0.00532	0.0791	0.1	0.816	0.906	0.05	0.9	0.956	3.03	8.12e-14	4.21e-12	160212782	160283376	-	16	18	TSS	KRT8P12	124	promoter-TSS	0.062006	0.548071	NM_002268	Unchanged	Unchanged	Unchanged	Gain
NUP210L	chr1	153960075	153970484	ENSG00000143552	10410	*	8.71	9.71	9.6	9.01	5.72	288	549.06	766	909.18	777.25	778.34	530.22	500.97	55.3	50.24	1	0.00542	0.08	0.89	0.018	0.162	0.3	0.416	0.663	3.08	2.84e-16	2.64e-14	153965160	154127592	-	39	120	TTS	RPS27	654	TTS	0.026614	0.47017	NM_001349947	Unchanged	Unchanged	Unchanged	Gain
H3F3A	chr1	226256261	226259005	ENSG00000163041	2745	*	6.99	7.87	7.49	7.35	3.33	119	134.59	246.63	219.64	185.74	174.45	189.85	136.63	12.82	7.28	0.88	0.00541	0.08	0.51	0.131	0.378	0.36	0.295	0.556	3.78	1.25e-16	1.28e-14	226249551	226259224	+	4	1591	TTS	RP11-396C23.4	8056	intron	0.018593	0.434767	NM_002107, intron 3 of 3	Unchanged	Unchanged	Unchanged	Gain
RALGDS	chr9	135987111	136004922	ENSG00000160271	17812	*	8.45	9.33	8.83	9.67	6.94	285	413.75	667.51	618.37	395.4	515.47	965.51	665.62	137.04	108.5	0.88	0.0055	0.0809	0.38	0.272	0.529	1.22	0.000532	0.0183	1.74	1.66e-07	1.93e-06	135973507	136039301	-	22	22510	TTS	GBGT1	32322	intron	0.028972	0.59598	NM_001042368, intron 1 of 17	Unchanged	Unchanged	Gain	Gain
RHBDF2	chr17	74484193	74491707	ENSG00000129667	7515	*	7.18	8.15	7.73	8.15	6.37	109	180.88	249.16	319.13	170.6	254.97	327.54	239.97	83.34	81.56	0.97	0.00552	0.0811	0.55	0.148	0.4	0.97	0.00805	0.0845	1.17	0.00081	0.00316	74467150	74497872	-	18	9922	TSS	AANAT	21751	intron	0.022361	0.581847	NM_024599, intron 1 of 18	Unchanged	Unchanged	Unchanged	Gain
RP11-6O2.4	chr15	99662287	99665221	ENSG00000261054	2935	*	7.25	6.26	6.9	7.28	4.72	121	183.73	80.81	71.94	97.26	142.09	151.37	159.4	34.46	18.2	-1	0.00559	0.0815	-0.35	0.35	0.597	0.03	0.946	0.977	2.68	1.02e-10	2.54e-09	99669036	99672011	-	1	5282	TTS	SYNM	12044	intron	0.020798	0.503749	NM_015286, intron 3 of 5	Unchanged	Unchanged	Unchanged	Gain
XAB2	chr19	7676495	7699304	ENSG00000076924	22810	*	8.67	9.62	9.31	9.24	6.74	297	516.3	745.8	826.53	525.34	745.97	662.77	544.76	126.62	87.38	0.95	0.00559	0.0815	0.64	0.0884	0.315	0.57	0.113	0.343	2.09	8.09e-09	1.31e-07	7684410	7694451	-	18	3490	TTS	CAMSAP3	4710	intron	0.037706	0.609102	NM_020196, intron 9 of 18	Unchanged	Unchanged	Unchanged	Gain
AC104841.2	chr2	242162699	242170617	ENSG00000268485	7919	*	7.49	8.35	8.05	8.35	5.43	161	198.69	303.87	348.21	211.25	320.49	378.85	272.38	51.29	34.95	0.86	0.00564	0.082	0.56	0.11	0.35	0.86	0.0111	0.1	2.21	1.4e-09	2.69e-08	242167318	242168850	+	0	660	TSS	ANO7	1867	TTS	0.031451	0.572872	NM_001243900	Unchanged	Unchanged	Unchanged	Gain
FAM211A	chr17	16342047	16353322	ENSG00000181350	11276	*	9.26	10.15	10.23	10.07	5.78	514	713.56	1162.46	1105.1	1171.86	1231.44	1094.64	1052.73	59.3	50.24	0.89	0.00566	0.082	0.97	0.00519	0.0969	0.81	0.0157	0.122	3.54	6.68e-25	5.13e-22	16345327	16395467	-	3	2358	TTS	RP11-138I1.3	3418	intron	0.018982	0.517073	NM_207387, intron 2 of 2	Unchanged	Unchanged	Unchanged	Gain
LINC00338	chr17	75083074	75095722	ENSG00000234912	12649	*	7.72	8.69	8.67	8.45	6.66	152	269.9	363.64	463.78	388.23	428.64	400.23	301.28	107.38	95.39	0.97	0.00574	0.0828	0.95	0.00893	0.121	0.73	0.0466	0.216	1.49	1.17e-05	8.14e-05	75082797	75089844	+	3	446	TTS	AC015815.2	1374	non-coding	0.020558	0.487508	NR_027058, exon 3 of 3	Unchanged	Unchanged	Unchanged	Gain
CEP170B	chr14	105347748	105363070	ENSG00000099814	15323	*	7.8	8.79	8.72	9.22	6.41	168	278.45	347.64	540.31	347.57	498.1	709.81	486.95	109.79	60.44	0.99	0.00575	0.0829	0.92	0.013	0.14	1.42	0.000101	0.00679	1.55	6.27e-05	0.000354	105331616	105363079	+	18	7670	TTS	CTD-3051D23.3	15269	intron	0.036486	0.650111	NM_001112726, intron 12 of 18	Unchanged	Unchanged	Gain	Gain
CTB-131K11.1	chr17	37562543	37568548	ENSG00000266469	6006	*	6.84	7.73	7.45	7.57	5.14	103	126.05	216.33	208.16	180.96	168.14	222.35	156.77	32.86	37.87	0.89	0.00577	0.0829	0.61	0.0755	0.293	0.73	0.039	0.198	2.01	6.53e-08	8.38e-07	37558045	37562486	+	1	3060	TTS	MED1	5008	exon	0.013324	0.451624	NM_004774, exon 17 of 17	Unchanged	Unchanged	Unchanged	Gain
AP001092.4	chr11	64413181	64426771	ENSG00000237410	13591	*	8.55	9.52	8.69	9.79	6.55	264	484.25	677.61	789.03	362.72	464.95	1015.97	756.71	92.96	93.93	0.97	0.00578	0.083	0.15	0.702	0.842	1.24	0.000921	0.0249	2.18	7.17e-10	1.49e-08	64413870	64427153	+	1	6106	TSS	NRXN2	46331	intron	0.014203	0.562252	NM_138732, intron 10 of 19	Unchanged	Unchanged	Gain	Gain
RAB12	chr18	8608151	8613363	ENSG00000206418	5213	*	7.3	8.29	7.97	8.19	5.16	108	206.52	324.08	301.53	214.44	285.76	297.61	286.39	33.66	37.87	0.99	0.0058	0.083	0.67	0.0847	0.31	0.89	0.0163	0.124	2.4	6.82e-10	1.42e-08	8609442	8639379	+	5	1315	TSS	RP11-661O13.1	24419	intron	0.044521	0.503454	NM_001025300, intron 1 of 5	Unchanged	Unchanged	Unchanged	Gain
IPO7	chr11	9405691	9407491	ENSG00000205339	1801	*	7.66	8.55	8.26	7.74	3.86	188	217.2	308.92	439.29	276.62	334.7	246.3	180.42	14.42	14.56	0.88	0.00582	0.083	0.59	0.0697	0.283	0.07	0.826	0.92	3.84	2.54e-21	7.43e-19	9406168	9469673	+	24	423	TSS	SNORA23	43728	intron	0.053919	0.55	NM_006391, intron 1 of 24	Unchanged	Unchanged	Unchanged	Gain
OST4	chr2	27289295	27295899	ENSG00000228474	6605	*	6.72	7.65	7.06	7.43	5.69	94	116.79	227.27	174.49	107.62	159.46	188.14	157.65	59.3	43.69	0.93	0.0058	0.083	0.34	0.36	0.605	0.71	0.0383	0.196	1.41	0.000109	0.000571	27293339	27294641	-	2	742	TTS	AGBL5	893	TTS	0.028623	0.54149	NM_001134693	Unchanged	Unchanged	Unchanged	Gain
OSBPL5	chr11	3150724	3160449	ENSG00000021762	9726	*	6.91	7.83	7.33	8.02	6.23	97	143.14	215.49	241.07	139.51	182.35	298.46	222.46	91.36	58.25	0.93	0.00594	0.0841	0.42	0.252	0.511	1.12	0.00165	0.034	0.98	0.00866	0.0224	3108345	3186584	-	21	30998	TSS	AC108448.2	48914	intron	0.020053	0.605553	NM_145638, intron 1 of 20	Unchanged	Unchanged	Gain	Unchanged
BRD9	chr5	867144	881066	ENSG00000028310	13923	*	7.38	8.22	8.32	8.44	6.68	159	173.76	309.77	284.69	320.47	319.7	367.73	328.43	110.59	94.66	0.84	0.00593	0.0841	0.94	0.00318	0.0775	1.06	0.000751	0.0224	1.18	0.00026	0.0012	850405	880213	-	18	6108	TSS	TRIP13	18652	intron	0.022915	0.515012	NM_001317951, intron 12 of 15	Unchanged	Unchanged	Gain	Gain
QARS	chr3	49130471	49135142	ENSG00000172053	4672	*	7.74	8.67	8.24	8.28	5.33	157	269.9	395.63	420.92	277.42	326.81	330.1	289.9	50.49	29.86	0.94	0.00594	0.0842	0.5	0.169	0.425	0.54	0.132	0.373	2.5	3.65e-10	8.08e-09	49133364	49142504	-	23	558	TTS	QRICH1	1010	TTS	0.044968	0.559623	NR_073590	Unchanged	Unchanged	Unchanged	Gain
TRIP13	chr5	890108	894812	ENSG00000071539	4705	*	7.98	8.9	8.29	8.18	5.62	202	304.08	411.62	541.07	282.2	344.96	315.57	262.75	49.69	48.79	0.91	0.00598	0.0844	0.31	0.377	0.62	0.19	0.578	0.781	2.49	1.97e-12	7.43e-11	892757	918235	+	12	297	TSS	BRD9	12247	promoter-TSS	0.047842	0.587798	NM_001166260	Unchanged	Unchanged	Unchanged	Gain
WDR45B	chr17	80570267	80578766	ENSG00000141580	8500	*	6.8	7.75	7.8	7.97	6.14	92	131.03	186.03	244.13	183.35	263.66	265.96	235.59	83.34	57.53	0.95	0.00599	0.0844	1	0.00611	0.105	1.17	0.000654	0.0209	1.09	0.00263	0.00842	80572437	80606411	-	9	2080	TTS	FOXK2	12034	exon	0.030713	0.518885	NM_019613, exon 9 of 10	Unchanged	Unchanged	Gain	Gain
OTUB2	chr14	94508133	94518788	ENSG00000089723	10656	*	6.88	7.77	7.75	8.3	5.56	106	130.32	205.39	231.89	208.06	222.61	330.96	301.28	43.27	50.97	0.89	0.00602	0.0848	0.87	0.0101	0.126	1.42	1.35e-05	0.00192	1.62	6.65e-06	5e-05	94492674	94515276	+	5	1816	TTS	DDX24	3806	3' UTR	0.014736	0.523698	NM_023112, exon 6 of 6	Unchanged	Unchanged	Gain	Gain
BCL9	chr1	147070124	147074727	ENSG00000116128	4604	*	6.17	7.14	6.63	6.83	4.52	64	80.47	149.83	132.4	92.47	105.78	119.73	108.6	25.64	20.39	0.97	0.00605	0.0851	0.46	0.227	0.486	0.66	0.072	0.274	1.85	8.81e-06	6.38e-05	147013181	147098017	+	9	25592	TTS	ACP6	29026	intron	0.038679	0.532262	NM_004326, intron 1 of 9	Unchanged	Unchanged	Unchanged	Gain
METTL1	chr12	58156812	58167557	ENSG00000037897	10746	*	8.55	9.42	8.73	8.84	6.3	303	444.37	731.49	640.56	389.82	461	449.83	469.44	88.15	69.18	0.88	0.00625	0.0866	0.19	0.588	0.772	0.3	0.37	0.626	2.42	1.12e-12	4.46e-11	58162253	58166576	-	5	68	TTS	CYP27B1	1150	TTS	0.030994	0.547045	NM_023033	Unchanged	Unchanged	Unchanged	Gain
CCNL1	chr3	156876103	156879984	ENSG00000163660	3882	*	7.69	8.67	8.11	7.97	4.47	143	269.9	361.95	453.06	239.95	313.39	270.24	232.09	24.04	20.39	0.98	0.00632	0.0872	0.42	0.272	0.528	0.28	0.452	0.693	3.32	1.12e-15	9.13e-14	156864296	156878549	-	12	506	TSS	KRT18P34	2408	5' UTR	0.04768	0.494976	NM_020307, exon 1 of 11	Unchanged	Unchanged	Unchanged	Gain
OTUD5	chrX	48812937	48817639	ENSG00000068308	4703	*	7.46	8.43	7.95	8.06	4.36	121	230.73	330.81	361.22	229.59	263.66	304.45	229.46	28.05	13.11	0.98	0.00633	0.0872	0.49	0.2	0.457	0.6	0.115	0.345	3.2	9.39e-13	3.82e-11	48779304	48814893	-	9	395	TSS	RNU6-722P	1151	promoter-TSS	0.051691	0.553807	NM_001136158	Unchanged	Unchanged	Unchanged	Gain
PARP1	chr1	226539856	226546317	ENSG00000143799	6462	*	7.1	7.94	7.84	7.78	5.47	131	143.14	245.79	246.43	216.04	242.34	232.61	207.57	37.66	50.97	0.84	0.00637	0.0874	0.74	0.0241	0.182	0.68	0.0354	0.187	1.95	6.41e-08	8.26e-07	226548391	226595774	-	22	5304	TTS	YBX1P9	36692	Intergenic	0.011455	0.495744		Unchanged	Unchanged	Unchanged	Gain
SERPINH1	chr11	75279176	75288344	ENSG00000149257	9169	*	7.64	8.49	7.76	8.08	5.66	171	228.6	361.11	358.93	220.82	213.92	297.61	242.6	54.49	46.6	0.85	0.00636	0.0874	0.12	0.721	0.853	0.43	0.193	0.451	2.26	6.29e-11	1.65e-09	75273100	75283828	+	5	68	TTS	CTD-2530H12.4	10480	TTS	0.015927	0.52945	NM_001207014	Unchanged	Unchanged	Unchanged	Gain
CHMP1B	chr18	11850074	11852561	ENSG00000255112	2488	*	6.24	7.17	6.75	5.45	4.29	76	74.77	132.16	156.12	95.66	119.2	42.76	44.67	21.64	17.48	0.94	0.00642	0.0878	0.51	0.164	0.418	-0.79	0.0499	0.225	2.23	1.07e-07	1.29e-06	11851394	11854448	+	1	76	TSS	RP11-78A19.3	94	promoter-TSS	0.042639	0.480097	NM_020412	Unchanged	Unchanged	Unchanged	Gain
NOL12	chr22	38156459	38165897	ENSG00000100101	9439	*	7.5	8.42	8.33	8.46	6.35	136	226.46	342.59	343.62	290.17	352.86	391.68	310.92	85.75	77.19	0.92	0.00641	0.0878	0.83	0.0221	0.175	0.95	0.00753	0.0816	1.44	3.58e-05	0.000217	38082420	38170137	+	27	8959	TTS	TRIOBP	11385	intron	0.018968	0.539309	NM_001039141, intron 17 of 23	Unchanged	Unchanged	Unchanged	Gain
RSRC2	chr12	123009232	123013826	ENSG00000111011	4595	*	6.07	7.07	6.36	6.3	4.41	66	68.37	159.93	108.67	79.72	84.46	85.52	71.82	20.03	22.57	1	0.00647	0.0883	0.29	0.445	0.672	0.23	0.55	0.762	1.97	2.45e-06	2.08e-05	122989189	123011546	-	10	17	TSS	KNTC1	265	promoter-TSS	0.036795	0.456247	NM_023012	Unchanged	Unchanged	Unchanged	Gain
SRSF4	chr1	29503938	29509661	ENSG00000116350	5724	*	8.16	9	8.57	8.67	5.01	244	326.87	479.8	544.13	352.35	405.74	465.22	348.58	36.06	28.4	0.84	0.00652	0.0888	0.41	0.219	0.477	0.51	0.128	0.366	3.26	2.06e-19	4.09e-17	29474254	29508499	-	7	1700	TSS	MECR	12584	intron	0.036351	0.477721	NM_005626, intron 1 of 5	Unchanged	Unchanged	Unchanged	Gain
PARVB	chr22	44412651	44421504	ENSG00000188677	8854	*	7.68	8.52	8.26	8.09	6.16	178	231.44	380.47	352.81	286.19	326.02	307.01	237.35	85.75	57.53	0.84	0.00659	0.089	0.58	0.0803	0.303	0.41	0.221	0.481	1.76	5.91e-07	5.96e-06	44395090	44564803	+	13	21988	TSS	SAMM50	24664	intron	0.028807	0.536428	NM_001003828, intron 2 of 13	Unchanged	Unchanged	Unchanged	Gain
MAP2K2	chr19	4086473	4091377	ENSG00000126934	4905	*	7.44	8.36	8.36	8.27	4.65	150	197.97	263.47	392.6	280.61	378.12	353.19	262.75	29.65	20.39	0.91	0.0066	0.089	0.92	0.00754	0.113	0.82	0.0152	0.12	2.91	6.74e-14	3.54e-12	4090318	4124126	-	11	1393	TTS	ZBTB7A	21982	Intergenic	0.037936	0.57708		Unchanged	Unchanged	Unchanged	Gain
NIPSNAP1	chr22	29946396	29955819	ENSG00000184117	9424	*	7.41	8.24	7.88	7.94	5.93	156	183.02	324.08	282.4	218.43	253.39	265.11	225.09	60.9	61.17	0.84	0.00661	0.089	0.48	0.148	0.401	0.53	0.102	0.325	1.86	2.92e-08	4.1e-07	29950796	29977326	-	9	312	TTS	THOC5	1336	3' UTR	0.022501	0.51629	NM_003634, exon 10 of 10	Unchanged	Unchanged	Unchanged	Gain
snoZ6	chr21	45850673	45867695	ENSG00000253067	17023	*	8.76	9.71	9.94	9.35	7.12	320	549.77	743.27	930.61	824.29	1143.03	726.91	577.16	142.65	135.44	0.94	0.00663	0.0891	1.18	0.00195	0.0608	0.58	0.105	0.331	1.87	3.44e-08	4.75e-07	45858917	45858993	+	0	191	TTS	TRPM2	3780	intron	0.027495	0.573317	NM_001320351, intron 29 of 30	Unchanged	Gain	Unchanged	Gain
PDXDC1	chr16	15218679	15249583	ENSG00000179889	30905	*	7.68	8.69	8.28	8.48	6.53	138	273.46	356.06	467.6	267.06	356.01	429.31	285.52	89.75	95.39	1	0.00664	0.0892	0.6	0.125	0.372	0.8	0.0424	0.206	1.41	9.06e-05	0.000485	15068868	15233196	+	22	935	TTS	NPIPP1	8673	TTS	0.042844	0.61704	NM_001285449	Unchanged	Unchanged	Unchanged	Gain
NUFIP2	chr17	27618634	27622176	ENSG00000108256	3543	*	7.15	8.07	7.7	7.54	5.1	111	172.34	239.06	300	188.93	225.76	215.51	156.77	36.06	32.77	0.93	0.00667	0.0894	0.55	0.127	0.374	0.39	0.284	0.547	2.19	1.07e-08	1.69e-07	27582853	27621136	-	3	731	TSS	CRYBA1	38904	intron	0.049421	0.538396	NM_020772, intron 1 of 3	Unchanged	Unchanged	Unchanged	Gain
RN7SL752P	chr3	129287874	129299183	ENSG00000239437	11310	*	8.35	9.29	8.91	9.32	6.08	240	413.75	551.35	702.55	396.2	565.2	720.07	554.39	74.53	61.17	0.94	0.0067	0.0896	0.56	0.139	0.389	0.96	0.0078	0.0831	2.42	1.44e-11	4.51e-10	129310191	129310488	+	0	16662	TSS	PLXND1	19512	intron	0.024496	0.590857	NM_015103, intron 11 of 35	Unchanged	Unchanged	Unchanged	Gain
PEF1	chr1	32108948	32112644	ENSG00000162517	3697	*	6.09	7.04	6.34	6.28	4.77	64	71.93	143.94	120.15	85.3	76.57	67.56	87.58	31.25	23.3	0.96	0.00677	0.0901	0.25	0.512	0.718	0.19	0.626	0.812	1.62	6.72e-05	0.000376	32095462	32110488	-	4	308	TSS	RP11-73M7.9	502	promoter-TSS	0.02977	0.495671	NM_001359651	Unchanged	Unchanged	Unchanged	Gain
CPSF7	chr11	61170063	61180225	ENSG00000149532	10163	*	7.28	8.15	8.49	8.17	5.59	130	180.88	292.93	275.51	361.12	356.01	276.23	301.28	50.49	45.87	0.87	0.00681	0.0904	1.21	0.00033	0.0263	0.89	0.00743	0.0809	2.06	4.47e-09	7.66e-08	61170120	61197503	-	9	5024	TTS	TMEM216	8824	intron	0.012892	0.449518	NM_001136040, intron 9 of 9	Unchanged	Gain	Unchanged	Gain
RPS23	chr5	81566891	81571925	ENSG00000186468	5035	*	7.62	8.59	8.77	7.89	4.31	133	260.64	388.05	384.18	414.53	456.27	231.76	242.6	20.03	19.66	0.97	0.00679	0.0904	1.15	0.00246	0.0675	0.27	0.48	0.714	3.38	2.45e-15	1.89e-13	81569176	81574396	-	5	232	TTS	ATG10	17450	3' UTR	0.014107	0.411601	NM_001025, exon 4 of 4	Unchanged	Gain	Unchanged	Gain
RPL24	chr3	101397436	101404219	ENSG00000114391	6784	*	7.17	8.02	8.06	7.55	5.2	132	156.67	264.31	253.32	296.55	237.61	166.76	207.57	37.66	35.68	0.84	0.00687	0.0907	0.89	0.00809	0.117	0.37	0.266	0.529	2.2	1.11e-09	2.2e-08	101399935	101405626	-	5	892	TTS	ZBTB11-AS1	2766	intron	0.012976	0.418989	NM_000986, intron 5 of 5	Unchanged	Unchanged	Unchanged	Gain
CTD-2562J15.4	chr19	16295711	16303483	ENSG00000267033	7773	*	6.73	7.67	6.83	6.63	5.26	81	131.03	200.34	208.16	107.62	119.99	109.46	88.46	41.67	34.95	0.95	0.00692	0.0911	0.1	0.8	0.898	-0.1	0.782	0.899	1.77	4.1e-06	3.27e-05	16297086	16300269	-	1	672	TSS	FAM32A	3260	intron	0.024321	0.525219	NM_014077, intron 2 of 3	Unchanged	Unchanged	Unchanged	Gain
RP11-61J19.4	chr1	212731275	212732943	ENSG00000260805	1669	*	6.94	5.95	6.82	6.08	3.99	123	123.2	51.35	72.7	109.21	116.83	73.55	61.31	12.82	18.93	-0.99	0.00693	0.0911	-0.12	0.72	0.852	-0.87	0.016	0.123	3.06	3.4e-13	1.53e-11	212731174	212733073	+	0	935	TSS	RP11-61J19.3	2702	Intergenic	0.065387	0.577938		Unchanged	Unchanged	Unchanged	Gain
SMAD3	chr15	67355726	67362358	ENSG00000166949	6633	*	6.94	7.9	8.34	7.55	6.37	89	155.96	228.12	247.96	274.23	374.17	200.11	175.16	99.37	65.54	0.96	0.00691	0.0911	1.4	0.000193	0.0197	0.62	0.0984	0.319	0.97	0.00891	0.0229	67358182	67487533	+	8	860	TSS	RP11-798K3.2	7451	intron	0.046599	0.560917	NM_005902, intron 1 of 8	Unchanged	Gain	Unchanged	Unchanged
OGFR	chr20	61438658	61447493	ENSG00000060491	8836	*	7.61	8.56	8.38	8.82	6.44	139	251.38	338.39	417.86	224.81	442.85	490.02	410.76	94.56	78.64	0.95	0.00695	0.0912	0.77	0.0629	0.271	1.21	0.000906	0.0247	1.42	6.98e-05	0.000389	61436186	61445352	+	6	2276	TTS	COL9A3	5338	intron	0.033281	0.622071	NM_007346, intron 6 of 6	Unchanged	Unchanged	Gain	Gain
CTC-301O7.4	chr19	49835353	49848412	ENSG00000197813	13060	*	8.49	9.43	9.29	9.3	6.33	263	456.48	606.06	771.43	568.39	685.19	736.32	528.12	88.15	72.82	0.94	0.0071	0.0928	0.8	0.0287	0.194	0.81	0.0272	0.163	2.32	5.88e-11	1.56e-09	49834873	49843539	-	2	1656	TSS	TEAD2	1968	intron	0.024966	0.558006	NM_001040031, intron 5 of 7	Unchanged	Unchanged	Unchanged	Gain
RP11-156K13.1	chr8	17657974	17659480	ENSG00000253944	1507	*	7.36	6.46	7.1	6.61	4.18	153	176.61	81.65	94.9	121.17	153.14	89.8	105.1	22.44	13.84	-0.9	0.00714	0.093	-0.26	0.436	0.665	-0.76	0.0262	0.16	3.24	1.74e-15	1.38e-13	17658853	17718578	+	1	126	TSS	MTUS1	301	promoter-TSS	0.096346	0.664011	NM_001363062	Unchanged	Unchanged	Unchanged	Gain
TLN1	chr9	35702719	35709445	ENSG00000137076	6727	*	7.11	8.05	7.73	8.23	5.9	103	173.76	244.11	286.22	185.74	237.61	348.06	251.36	62.51	56.8	0.94	0.00718	0.0931	0.61	0.1	0.335	1.11	0.00247	0.0432	1.5	3.87e-05	0.000233	35696944	35732392	-	56	9138	TTS	TPM2	15065	exon	0.016357	0.5281	NM_006289, exon 41 of 57	Unchanged	Unchanged	Gain	Gain
AC010327.2	chr19	55729957	55744217	ENSG00000269808	14261	*	8.57	9.45	9.3	9.67	6.7	294	465.74	676.77	723.98	509.4	749.13	907.36	717.29	121.81	85.92	0.88	0.0072	0.0932	0.73	0.0489	0.242	1.1	0.00181	0.0359	2.1	1.7e-09	3.21e-08	55738586	55741647	+	0	1499	TSS	TMEM86B	1499	TTS	0.024336	0.579663	NM_173804	Unchanged	Unchanged	Gain	Gain
CDCA4	chr14	105470183	105476748	ENSG00000170779	6566	*	6.86	7.85	7.77	8.05	4.95	80	153.11	218.86	244.13	201.69	236.03	271.95	257.49	36.86	24.76	0.99	0.0072	0.0932	0.91	0.0184	0.163	1.18	0.00158	0.0334	2.06	1.09e-06	1.02e-05	105475909	105487485	-	2	2444	TTS	C14orf79	3354	Intergenic	0.025289	0.536786		Unchanged	Unchanged	Gain	Gain
CLASRP	chr19	45566807	45576421	ENSG00000104859	9615	*	7.79	8.71	8.68	8.8	5.77	177	267.05	344.28	492.86	357.14	461	542.19	351.2	60.1	48.79	0.91	0.00729	0.0938	0.88	0.0122	0.135	1.01	0.00531	0.067	2.18	9.02e-10	1.82e-08	45542297	45574214	+	20	2600	TTS	ZNF296	3143	intron	0.038177	0.602143	NR_103529, intron 15 of 20	Unchanged	Unchanged	Gain	Gain
CTD-2589H19.6	chr5	667195	680201	ENSG00000271781	13007	*	10	11	11.13	11.14	7.03	768	1276.15	1761.79	2321.17	1775.32	2698.91	2599.78	1900.52	159.47	102.67	1	0.00734	0.094	1.13	0.00632	0.105	1.14	0.00351	0.053	3.02	1.56e-15	1.25e-13	675940	676731	+	0	2242	TSS	AC026740.1	4859	intron	0.041446	0.633861	NM_007030, intron 2 of 3	Unchanged	Unchanged	Gain	Gain
RNU6-105P	chr2	71558002	71561943	ENSG00000200779	3942	*	7.48	8.33	7.67	7.94	4.79	148	207.94	335.86	309.18	180.16	227.34	282.21	207.57	32.06	23.3	0.86	0.00731	0.094	0.2	0.581	0.767	0.46	0.187	0.444	2.79	4.68e-13	2.04e-11	71606884	71606988	-	0	46912	TTS	ZNF638	56250	intron	0.033249	0.445065	NM_001252613, intron 1 of 27	Unchanged	Unchanged	Unchanged	Gain
WDR4	chr21	44267500	44284941	ENSG00000160193	17442	*	8.71	9.64	9.15	9.59	6.92	301	536.95	781.99	811.99	458.38	679.66	915.05	628.84	145.85	96.12	0.93	0.00734	0.094	0.44	0.252	0.511	0.88	0.0195	0.138	1.99	5.81e-08	7.55e-07	44263203	44299641	-	11	13018	TTS	AP001628.6	19634	intron	0.036927	0.571412	NM_018669, intron 6 of 10	Unchanged	Unchanged	Unchanged	Gain
BX322557.10	chr21	46703405	46716685	ENSG00000215447	13281	*	8.41	9.42	9.25	9.43	6.74	217	464.31	633.84	731.63	486.28	729.39	780.79	599.06	119.41	94.66	1	0.00734	0.094	0.84	0.0415	0.225	1.02	0.00966	0.093	1.88	4.18e-07	4.38e-06	46707976	46711653	+	2	1608	TTS	POFUT2	2232	intron	0.038557	0.566566	NR_026943, intron 2 of 2	Unchanged	Unchanged	Gain	Gain
ATXN1L	chr16	71881903	71888241	ENSG00000224470	6339	*	8.05	8.96	8.39	8.3	5.3	195	336.84	502.53	495.15	331.63	339.44	351.48	280.26	48.88	29.86	0.91	0.00738	0.0944	0.34	0.354	0.6	0.25	0.495	0.726	2.89	1.55e-13	7.58e-12	71879950	71919171	+	3	5122	TSS	IST1	5174	exon	0.015307	0.513411	NM_001137675, exon 3 of 3	Unchanged	Unchanged	Unchanged	Gain
RP11-1072C15.1	chr17	42807972	42819520	ENSG00000240305	11549	*	7.07	8	7.9	7.82	6.4	101	167.35	271.89	238.78	217.63	260.5	254.85	197.93	92.96	75.73	0.93	0.00745	0.0945	0.83	0.0226	0.176	0.75	0.0391	0.198	1.08	0.00203	0.0068	42797127	42797965	-	0	15781	TSS	DBF4B	15886	intron	0.01351	0.49593	NR_148207, intron 5 of 10	Unchanged	Unchanged	Unchanged	Gain
GAPDHS	chr19	36030168	36039812	ENSG00000105679	9645	*	7.94	8.93	8.44	8.5	5.94	159	333.28	485.69	488.26	295.75	397.06	389.11	335.44	66.51	56.07	0.98	0.00742	0.0945	0.49	0.216	0.474	0.56	0.148	0.395	2.19	9.8e-09	1.56e-07	36024313	36036218	+	10	1228	TTS	TMEM147	1506	intron	0.026444	0.558689	NM_014364, intron 9 of 10	Unchanged	Unchanged	Unchanged	Gain
REXO1	chr19	1834267	1849038	ENSG00000079313	14772	*	8.12	9.09	8.55	8.77	6.18	188	368.89	488.22	603.83	338	409.69	466.93	404.63	83.34	61.17	0.97	0.0074	0.0945	0.43	0.268	0.525	0.65	0.0843	0.295	2.14	1.29e-08	1.99e-07	1815247	1848452	-	15	6800	TSS	CTB-31O20.6	10744	intron	0.038389	0.602803	NM_020695, intron 1 of 15	Unchanged	Unchanged	Unchanged	Gain
RP11-426A6.5	chr9	138391905	138399590	ENSG00000226706	7686	*	8.57	9.53	9.28	9.48	5.98	265	494.22	650.68	825.76	483.89	760.18	827.83	598.18	70.52	55.34	0.96	0.00745	0.0945	0.71	0.0719	0.287	0.91	0.0162	0.124	2.69	5.47e-13	2.34e-11	138395118	138398293	-	2	630	TTS	MRPS2	772	exon	0.040734	0.628887	NM_016034, exon 4 of 4	Unchanged	Unchanged	Unchanged	Gain
ATP2A2	chr12	110718411	110721093	ENSG00000174437	2683	*	6.72	7.59	6.78	7.13	3.21	98	113.23	196.97	188.27	94.86	125.51	159.07	121.74	11.22	7.28	0.87	0.00744	0.0945	0.06	0.87	0.935	0.41	0.244	0.506	3.59	2.47e-14	1.46e-12	110718920	110788895	+	20	832	TSS	IFT81	63172	intron	0.078329	0.598807	NM_170665, intron 1 of 19	Unchanged	Unchanged	Unchanged	Gain
RP1-63M2.6	chr20	32227946	32258591	ENSG00000272521	30646	*	9.66	10.51	10.43	10.57	7.52	715	901.56	1446.98	1467.09	1228.46	1525.09	1737.75	1292.71	211.56	154.37	0.85	0.00747	0.0947	0.77	0.0289	0.195	0.91	0.00919	0.0908	2.31	5.35e-12	1.85e-10	32244892	32245415	+	1	1624	TSS	NECAB3	1624	Intergenic	0.024083	0.543547		Unchanged	Unchanged	Unchanged	Gain
FBXO6	chr1	11721630	11728497	ENSG00000116663	6868	*	5.97	6.92	7.22	7	5.36	65	60.53	113.64	128.57	144.29	153.93	122.29	134	38.47	43.69	0.95	0.00754	0.095	1.25	0.000456	0.031	1.03	0.0041	0.058	1.07	0.00532	0.0151	11724180	11734411	+	5	884	TSS	FBXO44	1680	intron	0.033061	0.54842	NM_018438, intron 1 of 5	Unchanged	Gain	Gain	Gain
MIR22HG	chr17	1617248	1621814	ENSG00000186594	4567	*	7.36	8.24	7.27	7.31	4.9	129	198.69	292.93	312.24	139.51	168.14	151.37	165.53	33.66	26.21	0.89	0.00752	0.095	-0.09	0.791	0.893	-0.05	0.88	0.947	2.55	7e-11	1.82e-09	1614804	1619545	-	3	14	TSS	WDR81	285	promoter-TSS	0.04184	0.608191	NR_028505	Unchanged	Unchanged	Unchanged	Gain
MIR4505	chr14	74203338	74215623	ENSG00000264741	12286	*	8.19	9.01	8.03	8.67	7.52	251	331.86	489.9	539.54	238.36	282.6	429.31	384.48	191.53	175.49	0.82	0.00759	0.0953	-0.16	0.622	0.794	0.48	0.137	0.379	1.09	0.0005	0.00209	74225449	74225522	+	0	15968	TSS	ELMSAN1	27656	intron	0.015223	0.553114	NM_001043318, intron 1 of 11	Unchanged	Unchanged	Unchanged	Gain
SH3BP2	chr4	2818462	2829232	ENSG00000087266	10771	*	6.91	7.88	7.7	8.18	5.68	87	153.82	208.76	261.73	153.86	261.29	332.67	246.1	68.12	34.22	0.97	0.00762	0.0953	0.79	0.052	0.249	1.27	0.000706	0.0217	1.49	0.000331	0.00147	2794749	2836020	+	13	12173	TTS	ADD1	21736	intron	0.031294	0.596379	NM_001145855, intron 2 of 12	Unchanged	Unchanged	Gain	Gain
RAB26	chr16	2195670	2210821	ENSG00000167964	15152	*	10.21	11.2	11.08	10.76	7.37	881	1482.67	2290.42	2403.82	2055.13	2277.38	1742.02	1724.48	191.53	138.35	0.99	0.00762	0.0953	0.87	0.0275	0.191	0.55	0.14	0.384	2.92	4.47e-15	3.25e-13	2190803	2203071	+	9	174	TTS	RP11-304L19.5	1552	intron	0.038218	0.614019	NM_014353, intron 8 of 8	Unchanged	Unchanged	Unchanged	Gain
RP11-727F15.9	chr11	62601564	62607346	ENSG00000256690	5783	*	6.32	7.26	6.39	6.62	5.22	66	93.29	157.41	148.47	74.94	93.15	108.61	87.58	34.46	40.05	0.94	0.00762	0.0953	0.08	0.854	0.926	0.3	0.437	0.681	1.48	0.000114	0.000592	62599705	62601515	+	1	2940	TTS	WDR74	4072	5' UTR	0.022487	0.514701	NM_001369449, exon 5 of 13	Unchanged	Unchanged	Unchanged	Gain
MIR135B	chr1	205401000	205414163	ENSG00000199059	13164	*	8.45	9.28	9.33	9.52	6.49	298	403.78	582.49	665.05	619.41	669.4	758.55	707.66	100.97	79.37	0.83	0.00765	0.0955	0.88	0.00829	0.118	1.06	0.00107	0.0268	2.17	5.89e-11	1.56e-09	205417429	205417526	-	0	9848	TTS	LEMD1	17500	intron	0.011928	0.526324	NR_103783, intron 1 of 1	Unchanged	Unchanged	Gain	Gain
RP11-415J8.5	chr1	33806772	33816445	ENSG00000233246	9674	*	8.27	9.23	8.96	8.67	5.91	209	409.48	563.13	638.26	463.96	530.47	460.09	356.46	57.7	62.62	0.96	0.00767	0.0955	0.69	0.0715	0.286	0.4	0.292	0.554	2.56	4.61e-12	1.63e-10	33815952	33828846	+	2	4344	TSS	PHC2	21434	intron	0.027192	0.484234	NM_198040, intron 8 of 13	Unchanged	Unchanged	Unchanged	Gain
C7orf26	chr7	6627860	6631384	ENSG00000146576	3525	*	6.95	7.87	7.9	7.72	5.87	105	141.72	188.55	280.87	208.06	270.76	223.2	197.06	68.92	48.06	0.93	0.00766	0.0955	0.96	0.00634	0.105	0.77	0.0241	0.153	1.29	0.000452	0.00192	6629647	6648357	+	6	25	TSS	ZDHHC4	617	promoter-TSS	0.050809	0.564132	NM_001303039	Unchanged	Unchanged	Unchanged	Gain
UTP11L	chr1	38490416	38498201	ENSG00000183520	7786	*	7.6	8.46	8.7	8.89	5.51	160	229.31	370.37	333.67	350.76	481.53	507.13	442.29	48.08	42.96	0.85	0.00769	0.0956	1.1	0.00183	0.0588	1.29	0.000113	0.00727	2.25	3.35e-10	7.47e-09	38478413	38490496	+	7	3812	TTS	POU3F1	15214	Intergenic	0.01593	0.545151		Unchanged	Gain	Gain	Gain
COL1A1	chr17	48261507	48278973	ENSG00000108821	17467	*	8.28	9.17	8.3	7.5	7.05	243	377.43	495.79	658.16	284.59	346.54	196.69	164.65	141.04	124.52	0.9	0.00769	0.0956	0.02	0.949	0.975	-0.78	0.0242	0.153	1.52	3.56e-06	2.89e-05	48260649	48278993	-	50	8753	TSS	HILS1	11701	intron	0.02651	0.58548	NM_000088, intron 26 of 50	Unchanged	Unchanged	Unchanged	Gain
IQSEC1	chr3	12986019	12994047	ENSG00000144711	8029	*	6.28	7.27	6.88	7.06	5.62	58	97.56	154.88	153.06	103.63	132.62	147.09	119.11	48.08	50.24	0.99	0.00772	0.0958	0.6	0.131	0.379	0.78	0.0461	0.215	1.07	0.00477	0.0138	12942347	13114617	-	13	47686	TTS	RP11-767C1.1	63323	intron	0.016818	0.536996	NM_001134382, intron 1 of 14	Unchanged	Unchanged	Unchanged	Gain
BRD4	chr19	15440271	15445371	ENSG00000141867	5101	*	7.35	8.27	7.85	8.02	4.26	120	206.52	297.14	319.9	202.48	258.92	275.37	244.35	20.03	18.2	0.92	0.00778	0.0962	0.5	0.182	0.438	0.67	0.0629	0.255	3.16	5.36e-14	2.87e-12	15363802	15443356	-	19	535	TSS	AC005776.1	6937	intron	0.060208	0.568039	NM_001330384, intron 1 of 11	Unchanged	Unchanged	Unchanged	Gain
PPIF	chr10	81106643	81114115	ENSG00000108179	7473	*	7.9	8.87	8.51	8.85	6.07	159	317.61	510.95	422.45	298.15	429.43	492.59	428.27	80.14	54.61	0.97	0.00787	0.0969	0.61	0.123	0.369	0.95	0.0116	0.103	2.08	4.47e-08	5.99e-07	81107233	81115093	+	5	3146	TSS	ZCCHC24	31701	intron	0.028109	0.565846	NM_005729, intron 3 of 5	Unchanged	Unchanged	Unchanged	Gain
KMT2B	chr19	36220463	36236342	ENSG00000272333	15880	*	8.15	9.03	8.76	8.96	6.62	220	349.66	488.22	556.38	355.54	510.73	545.61	451.05	112.19	85.2	0.87	0.00795	0.0973	0.6	0.0987	0.332	0.81	0.0199	0.139	1.83	8.74e-08	1.09e-06	36208920	36229779	+	36	1376	TTS	IGFLR1	1712	intron	0.030923	0.583349	NM_014727, intron 33 of 36	Unchanged	Unchanged	Unchanged	Gain
PARP1	chr1	226566551	226571781	ENSG00000143799	5231	*	6.15	7.12	6.63	7.15	4.7	58	84.03	127.11	150.77	97.26	101.04	145.38	139.26	28.85	23.3	0.97	0.00796	0.0973	0.48	0.215	0.473	1	0.00642	0.0747	1.7	4.1e-05	0.000245	226548391	226595774	-	22	20775	TTS	RP11-118H4.3	30149	intron	0.015108	0.482792	NM_001618, intron 8 of 22	Unchanged	Unchanged	Unchanged	Gain
FBXO41	chr2	73494914	73500958	ENSG00000163013	6045	*	6.87	7.72	7.36	7.67	5.63	108	126.05	197.81	225	128.35	201.29	236.89	171.66	53.69	45.15	0.85	0.00799	0.0974	0.49	0.179	0.435	0.8	0.0199	0.139	1.55	1.52e-05	0.000103	73481817	73511559	-	12	13623	TSS	CCT7	17787	intron	0.028628	0.528458	NM_001371389, intron 1 of 12	Unchanged	Unchanged	Unchanged	Gain
RPS24	chr10	79793285	79805920	ENSG00000138326	12636	*	9.23	10.08	10.05	9.89	6.27	506	697.89	1127.95	1036.22	1066.63	1060.15	962.95	930.12	83.34	71.36	0.85	0.00802	0.0976	0.82	0.0167	0.156	0.65	0.0488	0.222	3.09	2.33e-20	5.78e-18	79793517	79816570	+	6	6086	TSS	POLR3A	10300	intron	0.014801	0.453977	NM_001142284, intron 5 of 6	Unchanged	Unchanged	Unchanged	Gain
RPL37A	chr2	217362304	217373373	ENSG00000197756	11070	*	8	8.87	9.04	8.7	6.04	207	304.08	531.15	404.85	580.35	468.9	359.18	472.07	70.52	61.17	0.87	0.00807	0.0979	1.04	0.00268	0.0703	0.7	0.0413	0.203	2.21	8.66e-11	2.21e-09	217363577	217443903	+	4	4262	TSS	AC098820.3	4354	3' UTR	0.014004	0.439335	NM_000998, exon 4 of 4	Unchanged	Gain	Unchanged	Gain
RNA5SP233	chr7	73885766	73896436	ENSG00000238391	10671	*	8.02	8.81	8.64	8.43	6.06	244	274.17	414.99	482.14	348.37	451.53	404.51	283.76	80.94	52.43	0.79	0.00816	0.0986	0.63	0.0565	0.258	0.41	0.217	0.478	2.14	7.18e-10	1.49e-08	73901757	73901870	-	0	10656	TTS	GTF2IRD1	22982	intron	0.022308	0.547516	NM_016328, intron 1 of 26	Unchanged	Unchanged	Unchanged	Gain
SNORD14C	chr11	122927600	122933996	ENSG00000202252	6397	*	8.19	8.99	8.58	7.6	4.71	264	321.89	498.32	515.82	344.38	418.37	211.23	176.92	31.25	21.12	0.79	0.00814	0.0986	0.38	0.246	0.505	-0.59	0.0659	0.262	3.57	5.19e-22	1.75e-19	122930042	122930130	-	0	668	TSS	SNORD14D	1095	promoter-TSS	0.030023	0.488118	NR_001453	Unchanged	Unchanged	Unchanged	Gain
AC011407.1	chr5	171848625	171859263	ENSG00000216127	10639	*	6.89	7.78	7.56	7.83	5.87	100	137.44	193.6	247.19	179.37	198.14	246.3	209.32	56.9	60.44	0.89	0.00827	0.0994	0.67	0.0552	0.255	0.94	0.00606	0.0723	1.37	0.000103	0.000545	171866666	171866758	-	0	12722	TTS	SH3PXD2B	27418	intron	0.017016	0.49906	NM_001308175, intron 1 of 12	Unchanged	Unchanged	Unchanged	Gain
RN7SL277P	chr1	19762811	19769457	ENSG00000240490	6647	*	6.45	7.33	6.92	7.44	4.57	83	91.87	159.09	162.24	114.79	127.88	182.16	165.53	24.04	23.3	0.88	0.00835	0.0994	0.47	0.184	0.441	0.99	0.00356	0.0534	2.05	3.39e-07	3.63e-06	19750877	19751163	+	0	14971	TTS	CAPZB	45932	intron	0.020467	0.478784	NM_001206540, intron 1 of 9	Unchanged	Unchanged	Unchanged	Gain
CTB-60B18.18	chr19	49564015	49571608	ENSG00000268287	7594	*	7.16	8.02	7.52	8.35	5.46	120	165.93	243.27	275.51	141.1	224.98	377.14	273.26	49.69	38.59	0.86	0.0083	0.0994	0.36	0.342	0.591	1.19	0.000629	0.0205	1.9	2.39e-07	2.67e-06	49567515	49568113	+	0	296	TSS	NTF4	522	promoter-TSS	0.023182	0.564994	NM_006179	Unchanged	Unchanged	Gain	Gain
MIR5587	chr16	567765	606148	ENSG00000266124	38384	*	9.78	10.72	10.44	10.89	8.16	667	1086.01	1509.27	1863.52	1164.68	1613.51	2195.28	1601.87	332.57	238.11	0.94	0.00837	0.0994	0.66	0.0864	0.312	1.12	0.00346	0.0527	1.81	4.56e-07	4.74e-06	585315	585368	+	0	1588	TTS	MIR3176	6320	intron	0.048122	0.640257	NM_005632, intron 3 of 13	Unchanged	Unchanged	Gain	Gain
CABLES2	chr20	60959022	60984632	ENSG00000149679	25611	*	9.6	10.49	10.62	10.52	7.94	628	923.64	1304.72	1578.83	1374.34	1783.22	1564.14	1364.52	262.85	227.92	0.89	0.00836	0.0994	1.03	0.00587	0.102	0.92	0.00899	0.0897	1.86	2.19e-08	3.18e-07	60963687	60982341	-	9	8140	TTS	RPS21	8252	intron	0.035417	0.5918	NM_031215, intron 1 of 9	Unchanged	Unchanged	Unchanged	Gain
POTEH	chr22	16285556	16294563	ENSG00000198062	9008	*	6.71	5.75	6.54	7.28	5.03	104	106.11	55.56	52.04	97.26	89.2	171.04	140.13	48.08	17.48	-0.97	0.0083	0.0994	-0.17	0.627	0.797	0.57	0.0967	0.316	1.98	7.93e-06	5.81e-05	16256440	16287937	-	11	2122	TSS	POTEH-AS1	11458	Intergenic	0.022096	0.491174		Unchanged	Unchanged	Unchanged	Gain
ACAA1	chr3	38155202	38165405	ENSG00000060971	10204	*	6.89	7.72	7.32	7.86	6.33	121	116.79	209.6	212.75	137.12	183.14	291.62	172.54	89.75	70.63	0.83	0.00835	0.0994	0.43	0.216	0.474	0.96	0.00762	0.0821	1.01	0.00329	0.0101	38144619	38164574	-	11	4270	TSS	DLEC1	4736	intron	0.014311	0.566892	NM_001321153, intron 33 of 36	Unchanged	Unchanged	Unchanged	Gain
CTB-174O21.2	chr19	47218681	47240753	ENSG00000269487	22073	*	9.73	10.7	10.38	10.84	7.42	605	1090.99	1533.68	1794.64	1085.76	1574.04	2108.05	1569.47	189.13	153.64	0.97	0.00838	0.0994	0.65	0.107	0.346	1.12	0.0044	0.0608	2.44	1.82e-11	5.55e-10	47231859	47235957	+	2	2142	TSS	STRN4	6950	intron	0.029496	0.586943	NM_001039877, intron 9 of 17	Unchanged	Unchanged	Gain	Gain
KCTD5	chr16	2739122	2768124	ENSG00000167977	29003	*	8.85	9.74	9.7	10.04	7.91	367	556.89	731.49	981.12	683.98	980.42	1176.74	926.62	281.28	200.98	0.89	0.00833	0.0994	0.85	0.0204	0.171	1.19	0.000708	0.0217	1.27	0.000177	0.000863	2732475	2759031	+	5	5408	TTS	PRSS27	8801	intron	0.033999	0.615785	NM_018992, intron 5 of 5	Unchanged	Unchanged	Gain	Gain
CTD-2278I10.6	chr19	17388908	17398996	ENSG00000269307	10089	*	6.71	7.68	7.6	7.81	5.69	75	133.88	182.66	226.53	152.26	235.24	252.28	195.31	65.71	37.87	0.97	0.00836	0.0994	0.89	0.0254	0.186	1.1	0.00357	0.0535	1.27	0.00172	0.00593	17378226	17393775	+	9	177	TTS	USHBP1	357	intron	0.030534	0.553727	NM_152363, intron 4 of 8	Unchanged	Unchanged	Gain	Gain
KPNB1	chr17	45725419	45729286	ENSG00000108424	3868	*	7.98	8.9	8.4	8.49	4.82	180	326.16	506.74	450	285.39	389.96	389.97	329.31	37.66	18.93	0.92	0.00826	0.0994	0.42	0.273	0.53	0.51	0.165	0.417	3.23	2.62e-14	1.53e-12	45727203	45762871	+	21	150	TSS	RP11-580I16.2	584	promoter-TSS	0.050957	0.557021	NM_002265	Unchanged	Unchanged	Unchanged	Gain
RPS5	chr19	58902093	58909366	ENSG00000083845	7274	*	8	8.91	8.86	8.73	5.58	185	327.58	455.39	505.87	455.19	473.63	468.64	379.23	54.49	41.51	0.91	0.00835	0.0994	0.86	0.0181	0.162	0.73	0.0453	0.213	2.54	1.9e-11	5.75e-10	58897766	58906173	+	6	444	TTS	AC012313.1	1726	TTS	0.034791	0.574866	NR_162103	Unchanged	Unchanged	Unchanged	Gain
RPS4X	chrX	71487990	71495106	ENSG00000198034	7117	*	7.28	8.17	8.03	7.6	4.5	122	188.72	315.66	260.2	291.77	229.71	212.94	174.29	18.43	26.94	0.89	0.00843	0.0998	0.75	0.0372	0.217	0.32	0.375	0.631	2.96	2.79e-13	1.28e-11	71475528	71493221	-	6	1673	TSS	PIN4	31228	TTS	0.009698	0.449972	NM_001007	Unchanged	Unchanged	Unchanged	Gain
RP11-26H16.1	chr1	22237728	22243947	ENSG00000232037	6220	*	6.65	7.5	7.08	7.59	5.24	103	98.27	174.24	189.03	124.36	146.04	220.64	163.78	40.07	35.68	0.85	0.00846	0.0999	0.43	0.22	0.479	0.93	0.00659	0.0757	1.66	8.5e-06	6.17e-05	22234590	22235073	+	0	5764	TTS	HSPG2	22952	intron	0.019299	0.535617	NM_005529, intron 1 of 96	Unchanged	Unchanged	Unchanged	Gain
SLC35G6	chr17	7381592	7385433	ENSG00000259224	3842	*	5.67	6.79	6.11	6.27	4.57	32	69.79	118.69	102.55	47.83	89.99	88.08	66.56	26.45	21.12	1.12	0.00867	0.1	0.44	0.381	0.624	0.6	0.19	0.448	1.33	0.00398	0.0119	7384720	7386383	+	1	1208	TSS	ZBTB4	4070	promoter-TSS	0.047396	0.601666	NM_001128833	Unchanged	Unchanged	Unchanged	Gain
IFITM9P	chr11	69079568	69083425	ENSG00000213275	3858	*	6.75	5.77	5.75	6.58	4.52	91	124.62	53.87	55.1	50.22	57.63	118.02	73.57	24.84	21.12	-0.98	0.00854	0.1	-1	0.0096	0.123	-0.17	0.653	0.828	2.43	1.32e-09	2.55e-08	69070878	69071274	-	0	10222	TSS	MYEOV	14756	Intergenic	0.008039	0.505315		Unchanged	Unchanged	Unchanged	Gain
TMC4	chr19	54667669	54674707	ENSG00000167608	7039	*	6.83	7.8	7.61	7.74	5.18	80	147.41	198.65	245.66	162.63	228.13	249.72	176.92	41.67	30.58	0.97	0.00875	0.1	0.78	0.0472	0.239	0.91	0.0192	0.136	1.92	1.69e-06	1.5e-05	54663901	54676944	-	14	5756	TSS	MBOAT7	5918	intron	0.033395	0.543052	NM_001145303, intron 5 of 14	Unchanged	Unchanged	Unchanged	Gain
AOC2	chr17	40993973	40999608	ENSG00000131480	5636	*	6.82	7.7	7.58	7.81	5.08	96	130.32	216.33	198.21	177.77	204.45	250.57	197.93	32.06	35.68	0.87	0.00854	0.1	0.76	0.0306	0.2	0.99	0.00444	0.061	2.01	9.35e-08	1.15e-06	40996616	41002724	+	3	174	TSS	PSME3	1534	exon	0.015264	0.508784	NM_009590, exon 1 of 4	Unchanged	Unchanged	Unchanged	Gain
DNMT3A	chr2	25561012	25566264	ENSG00000119772	5253	*	5.79	6.87	6.47	6.7	5.93	37	73.35	106.06	127.81	57.4	119.99	110.32	98.09	71.32	50.24	1.08	0.0085	0.1	0.68	0.154	0.407	0.92	0.0297	0.171	0.38	0.337	0.412	25455844	25565459	-	23	1821	TSS	MIR1301	12048	intron	0.075795	0.691546	NR_135490, intron 1 of 23	Unchanged	Unchanged	Unchanged	Unchanged
PLEKHF1	chr19	30163417	30173885	ENSG00000166289	10469	*	7.05	8.12	8.63	8.84	6.89	87	177.32	195.29	362.75	318.08	475.21	527.65	388.86	121.81	115.78	1.08	0.00854	0.1	1.59	7.74e-05	0.0123	1.79	3.67e-06	0.000801	0.55	0.119	0.181	30155962	30166364	+	1	2287	TTS	C19orf12	23069	Intergenic	0.026846	0.598204		Unchanged	Gain	Gain	Unchanged
C16orf93	chr16	30764940	30771586	ENSG00000196118	6647	*	6.56	7.51	7.19	7.81	5.39	71	118.21	183.5	179.85	130.74	161.03	241.16	206.69	50.49	33.5	0.94	0.00876	0.1	0.62	0.104	0.34	1.24	0.000663	0.0209	1.53	0.00011	0.000575	30768787	30774031	-	8	524	TTS	PHKG2	4227	TTS	0.016855	0.515799	NM_001014979	Unchanged	Unchanged	Gain	Gain
RAPH1	chr2	204398056	204401082	ENSG00000173166	3027	*	4.9	6.07	4.66	4.81	4.6	24	35.61	73.23	61.22	15.94	34.73	40.19	15.76	27.25	21.12	1.17	0.00871	0.1	-0.23	0.674	0.826	-0.09	0.866	0.94	0.75	0.102	0.16	204259067	204399985	-	15	416	TSS	ABI2	87123	intron	0.05686	0.543622	NM_213589, intron 1 of 13	Unchanged	Unchanged	Unchanged	Unchanged
ZNF445	chr3	44484282	44493435	ENSG00000185219	9154	*	7.27	8.09	7.68	7.86	5.75	140	168.78	283.67	260.97	165.81	245.5	272.81	192.68	61.71	45.87	0.82	0.00859	0.1	0.41	0.243	0.502	0.59	0.084	0.295	1.83	2.05e-07	2.32e-06	44481261	44519162	-	7	7598	TTS	LINC00694	23360	exon	0.01038	0.484104	NM_181489, exon 8 of 8	Unchanged	Unchanged	Unchanged	Gain
RP11-407N17.4	chr14	39642873	39649090	ENSG00000259083	6218	*	6.59	7.47	7.26	7.01	4.94	85	108.24	176.77	178.32	137.12	169.72	138.54	119.11	33.66	27.67	0.88	0.00858	0.1	0.67	0.0622	0.269	0.41	0.245	0.508	1.97	3.03e-07	3.28e-06	39644088	39645084	-	1	898	TSS	PNN	1566	intron	0.026384	0.453434	NM_002687, intron 3 of 8	Unchanged	Unchanged	Unchanged	Gain
IL17RA	chr22	17587779	17593273	ENSG00000177663	5495	*	6.36	7.27	6.98	7.17	5.22	71	93.29	154.04	153.83	99.65	153.14	179.59	107.73	43.27	31.31	0.91	0.00871	0.1	0.62	0.108	0.348	0.81	0.0375	0.194	1.45	0.000193	0.00093	17565848	17596583	+	12	6057	TTS	CECR6	6662	exon	0.031859	0.558427	NM_014339, exon 13 of 13	Unchanged	Unchanged	Unchanged	Gain
RHBDF2	chr17	74496371	74499942	ENSG00000129667	3572	*	5.01	6.27	5.71	6.23	4.93	18	46.29	75.76	78.06	45.44	59.2	86.37	63.93	39.27	21.85	1.26	0.00871	0.1	0.7	0.185	0.441	1.23	0.0131	0.11	0.7	0.135	0.199	74467150	74497872	-	18	284	TSS	PRCD	25510	promoter-TSS	0.035294	0.58107	NM_024599	Unchanged	Unchanged	Unchanged	Unchanged
RP1-102K2.8	chr22	30634932	30654701	ENSG00000268812	19770	*	9.36	10.27	9.75	9.38	7.5	494	818.96	1170.04	1293.37	700.72	1023.83	761.12	567.53	209.16	152.92	0.91	0.00864	0.1	0.39	0.303	0.557	0.02	0.965	0.985	2.07	4.16e-09	7.19e-08	30641983	30642907	+	1	1910	TTS	LIF	1976	Intergenic	0.024737	0.586626		Unchanged	Unchanged	Unchanged	Gain
ATG4D	chr19	10661564	10666913	ENSG00000130734	5350	*	7.52	8.41	8.44	8.64	4.68	149	219.34	289.56	389.54	263.87	432.58	425.89	373.1	26.45	24.76	0.88	0.00856	0.1	0.92	0.0139	0.145	1.12	0.000912	0.0248	2.94	2.5e-14	1.47e-12	10654593	10664094	+	9	144	TTS	KRI1	478	TTS	0.02356	0.555431	NR_104025	Unchanged	Unchanged	Gain	Gain
RP11-638I2.8	chr14	100809872	100815922	ENSG00000258666	6051	*	6.22	7.29	6.55	6.99	4.3	49	100.41	130.47	182.14	77.33	109.72	137.69	116.48	24.84	14.56	1.07	0.00863	0.1	0.32	0.466	0.686	0.77	0.0634	0.256	2.15	3.39e-06	2.78e-05	100800126	100820398	+	1	7501	TTS	WARS	12743	intron	0.027939	0.546281	NM_213646, intron 6 of 9	Unchanged	Unchanged	Unchanged	Gain
CCDC107	chr9	35658687	35666402	ENSG00000159884	7716	*	8.01	8.89	8.74	9.03	5.95	196	318.32	512.63	433.93	443.23	410.48	519.96	522.86	65.71	57.53	0.88	0.00854	0.1	0.73	0.0378	0.219	1.02	0.00305	0.049	2.33	2.35e-11	6.93e-10	35658310	35661508	+	5	1036	TTS	ARHGEF39	3674	exon	0.019575	0.509916	NM_032818, exon 7 of 9	Unchanged	Unchanged	Gain	Gain
HPS6	chr10	103823912	103830721	ENSG00000166189	6810	*	7	7.95	8.15	7.44	5.73	88	167.35	241.58	253.32	264.66	303.91	188.14	160.27	62.51	43.69	0.95	0.00873	0.1	1.15	0.00231	0.0654	0.45	0.246	0.508	1.55	7.31e-05	0.000403	103825146	103827792	+	0	476	TTS	C10orf76	11366	exon	0.026586	0.563372	NM_024747, exon 1 of 1	Unchanged	Gain	Unchanged	Gain
ETV5	chr3	185824437	185827286	ENSG00000244405	2850	*	6.56	7.53	6.53	6.68	4.33	67	121.78	186.87	182.91	69.35	116.04	130.84	74.44	24.84	15.29	0.97	0.00859	0.1	-0.03	0.938	0.97	0.12	0.787	0.901	2.39	8.19e-08	1.03e-06	185764096	185826901	-	12	1040	TSS	ETV5-AS1	27126	intron	0.058989	0.560197	NM_004454, intron 1 of 12	Unchanged	Unchanged	Unchanged	Gain
YY1AP1	chr1	155655518	155661236	ENSG00000163374	5719	*	6.17	7.11	6.18	6.15	5.06	59	84.74	136.36	140.82	64.57	80.52	63.28	78.82	35.26	31.31	0.95	0.00857	0.1	0.01	0.986	0.993	-0.02	0.953	0.98	1.33	0.000892	0.00342	155629236	155658791	-	11	414	TSS	DAP3	620	promoter-TSS	0.04163	0.506646	NM_001198903	Unchanged	Unchanged	Unchanged	Gain
PNRC1	chr6	89790195	89793666	ENSG00000146278	3472	*	7.1	7.93	7.23	8.32	4.01	124	150.97	254.21	234.95	129.14	172.09	347.21	290.77	18.43	13.84	0.83	0.00855	0.1	0.13	0.712	0.848	1.21	0.000207	0.0106	3.16	2.32e-14	1.38e-12	89790496	89794879	+	1	1434	TSS	RP11-63L7.5	1544	intron	0.055043	0.537597	NM_006813, intron 1 of 1	Unchanged	Unchanged	Gain	Gain
CDYL2	chr16	80836590	80839302	ENSG00000166446	2713	*	5.05	6.32	5.58	6.06	4.38	18	48.43	78.28	81.12	48.63	47.36	78.68	54.3	25.64	16.02	1.26	0.00867	0.1	0.53	0.326	0.575	1	0.0506	0.227	1.14	0.0214	0.0462	80631802	80838226	-	7	280	TSS	RP11-314O13.1	24685	intron	0.088528	0.676622	NM_152342, intron 1 of 6	Unchanged	Unchanged	Unchanged	Gain
CBX8	chr17	77766132	77773148	ENSG00000141570	7017	*	6.24	7.13	6.81	8.02	5.95	76	74.77	133	147.7	82.11	142.88	294.19	223.33	65.71	58.25	0.9	0.00868	0.1	0.58	0.145	0.397	1.78	2.01e-07	0.000112	0.81	0.0248	0.052	77769002	77775332	-	4	638	TTS	RP11-353N14.1	4756	intron	0.061155	0.6126	NM_020649, intron 4 of 4	Unchanged	Unchanged	Gain	Unchanged
KCTD15	chr19	34292054	34299370	ENSG00000153885	7317	*	6.24	7.27	6.31	6.4	5.84	51	100.41	163.3	145.41	58.99	99.46	92.36	77.07	62.51	52.43	1.03	0.00851	0.1	0.07	0.899	0.949	0.16	0.716	0.863	0.81	0.0342	0.067	34287766	34306668	+	7	7946	TSS	CHST8	31299	intron	0.017225	0.560689	NM_001129994, intron 4 of 6	Unchanged	Unchanged	Unchanged	Unchanged
GGCX	chr2	85764308	85778251	ENSG00000115486	13944	*	9.14	10.04	9.83	9.6	6.36	434	694.33	1171.72	935.97	994.88	823.33	767.96	788.24	92.16	72.09	0.9	0.00857	0.1	0.69	0.0577	0.26	0.46	0.181	0.437	2.92	9.25e-17	9.71e-15	85771845	85788632	-	14	566	TTS	MAT2A	1124	TTS	0.022307	0.458438	NM_001142269	Unchanged	Unchanged	Unchanged	Gain
KCTD5	chr16	2727163	2731004	ENSG00000167977	3842	*	5.28	6.49	6.75	6.33	3.73	23	54.83	101.01	78.83	113.2	102.62	84.66	76.2	20.03	6.55	1.21	0.00863	0.1	1.47	0.00113	0.0477	1.05	0.0252	0.157	1.85	0.0283	0.0577	2732475	2759031	+	5	3392	TSS	ERVK13-1	5708	Intergenic	0.019531	0.504035		Unchanged	Gain	Unchanged	Gain
CAPZB	chr1	19810061	19813217	ENSG00000077549	3157	*	5.41	6.47	6.26	5.82	4.24	35	49.85	92.59	84.18	66.17	87.62	59.86	53.42	15.23	22.57	1.06	0.00864	0.1	0.86	0.0449	0.233	0.42	0.347	0.608	1.52	0.00109	0.00405	19665266	19812066	-	9	427	TSS	RNU4-28P	25447	promoter-TSS	0.062758	0.640368	NM_001282162	Unchanged	Unchanged	Unchanged	Gain
ELAVL1	chr19	8063787	8067647	ENSG00000066044	3861	*	4.79	6.07	5.07	6.07	3.97	17	38.46	69.87	64.29	31.89	35.52	85.52	49.05	16.03	15.29	1.27	0.0085	0.1	0.28	0.632	0.8	1.28	0.0126	0.108	1.4	0.00546	0.0154	8023462	8070492	-	5	4775	TSS	CTD-2325M2.1	7895	intron	0.018399	0.533679	NM_001419, intron 1 of 5	Unchanged	Unchanged	Unchanged	Gain
VEZF1	chr17	56063901	56066905	ENSG00000136451	3005	*	6.41	7.41	6.92	6.61	5.1	58	111.81	181.82	159.18	110.01	131.83	88.08	106.85	32.06	36.41	1.01	0.00864	0.1	0.51	0.214	0.472	0.2	0.642	0.821	1.58	0.000117	0.000608	56051119	56065513	-	5	110	TSS	RP11-159D12.5	995	intron	0.056943	0.579893	NM_001330393, intron 1 of 6	Unchanged	Unchanged	Unchanged	Gain
LRPPRC	chr2	44211499	44223368	ENSG00000138095	11870	*	7.77	8.65	8.56	7.95	6.21	176	260.64	457.91	343.62	403.37	350.49	253.99	239.97	79.34	69.18	0.88	0.00853	0.1	0.79	0.0218	0.174	0.18	0.604	0.797	1.92	1.27e-08	1.96e-07	44113646	44223144	-	37	5710	TSS	AC019129.1	75598	intron	0.018874	0.434156	NM_133259, intron 1 of 37	Unchanged	Unchanged	Unchanged	Gain
PABPC1	chr8	101732201	101736927	ENSG00000070756	4727	*	8.98	9.91	9.6	9.5	5.4	351	655.88	936.87	988.01	714.27	835.17	832.96	618.33	47.28	37.14	0.93	0.0087	0.1	0.62	0.101	0.336	0.53	0.164	0.415	3.66	1.52e-21	4.7e-19	101715143	101734940	-	15	376	TSS	AP001205.1	14373	promoter-TSS	0.057778	0.539357	NM_002568	Unchanged	Unchanged	Unchanged	Gain
TPM4	chr19	16195454	16198728	ENSG00000167460	3275	*	5.29	6.34	5.66	6.07	3.54	37	41.3	83.33	78.83	38.26	63.15	74.4	59.56	16.03	7.28	1.05	0.00864	0.1	0.37	0.422	0.655	0.77	0.0668	0.263	1.87	0.000475	0.002	16178347	16213813	+	9	16722	TTS	CTD-2231E14.5	17479	intron	0.022609	0.521075	NM_003290, intron 2 of 7	Unchanged	Unchanged	Unchanged	Gain
RP11-465L8.1	chr12	118121551	118124831	ENSG00000256071	3281	*	6.35	5.26	5.78	5.94	3.26	96	66.94	35.35	41.33	65.37	44.21	56.44	66.56	10.42	8.74	-1.09	0.00898	0.101	-0.57	0.173	0.428	-0.41	0.313	0.576	3.27	1.55e-11	4.79e-10	118327258	118328813	+	1	204067	TSS	KSR2	232375	intron	0.010369	0.478659	NM_173598, intron 4 of 19	Unchanged	Unchanged	Unchanged	Gain
AL359091.1	chr9	131243171	131247065	ENSG00000264891	3895	*	5.02	6.24	5.57	6.5	4.71	20	44.86	71.55	79.59	38.26	56.84	116.31	64.81	31.25	21.12	1.22	0.00895	0.101	0.55	0.299	0.554	1.48	0.00233	0.0419	0.73	0.122	0.183	131239183	131239275	+	0	5843	TTS	ODF2	18453	exon	0.01644	0.480483	NM_001242352, exon 10 of 21	Unchanged	Unchanged	Gain	Unchanged
LINC01056	chr20	61673529	61677856	ENSG00000237119	4328	*	5.56	6.69	6.64	6.49	5.65	31	63.38	88.38	117.86	91.68	108.15	106.04	73.57	60.9	39.32	1.13	0.00882	0.101	1.08	0.0131	0.14	0.93	0.0387	0.198	0.58	0.156	0.224	61669362	61685215	+	5	6330	TSS	RP11-305P22.9	34958	intron	0.037448	0.55327	NR_033369, intron 1 of 5	Unchanged	Unchanged	Unchanged	Unchanged
RP11-463P17.1	chr10	48328853	48334314	ENSG00000226044	5462	*	6.05	4.93	6.39	6.66	5.3	60	72.64	30.3	30.61	85.3	82.89	114.6	87.58	43.27	35.68	-1.12	0.00887	0.101	0.34	0.374	0.618	0.61	0.11	0.339	1.1	0.0046	0.0134	48324787	48332197	-	3	614	TSS	ZNF488	23440	intron	0.015018	0.539828	NR_134500, intron 2 of 3	Unchanged	Unchanged	Unchanged	Gain
SNORD91A	chr17	2234772	2238346	ENSG00000212163	3575	*	5.9	6.84	5.6	5.94	3	57	62.67	116.16	113.27	43.05	53.68	74.4	48.17	8.01	8.01	0.94	0.009	0.101	-0.31	0.459	0.681	0.03	0.936	0.972	3.03	3.45e-09	6.06e-08	2233569	2233664	-	0	2895	TSS	TSR1	4242	intron	0.010076	0.423055	NM_018128, intron 6 of 14	Unchanged	Unchanged	Unchanged	Gain
GPC2	chr7	99767509	99772664	ENSG00000213420	5156	*	5.79	7	6.86	6.7	5	27	84.03	122.05	134.69	114	117.62	125.71	82.33	32.86	31.31	1.21	0.00896	0.101	1.06	0.0262	0.188	0.91	0.264	0.527	1.17	0.0102	0.0255	99767228	99774990	-	9	2858	TTS	GAL3ST4	3714	intron	0.031432	0.559457	NM_152742, intron 5 of 9	Unchanged	Unchanged	Unchanged	Gain
RPL21P28	chr1	212217364	212221163	ENSG00000220749	3800	*	4.76	6.02	5.39	4.57	4.06	18	36.32	68.18	61.22	45.44	38.68	23.09	24.52	13.62	19.66	1.25	0.00884	0.101	0.63	0.237	0.496	-0.19	0.721	0.866	1.42	0.00409	0.0121	212224828	212225371	-	0	5564	TTS	DTL	10346	intron	0.008425	0.40458	NM_001286230, intron 2 of 13	Unchanged	Unchanged	Unchanged	Gain
ZNF671	chr19	58232673	58237708	ENSG00000083814	5036	*	5.13	6.27	6.37	5.93	4.66	26	44.15	73.23	81.12	72.54	93.15	70.98	50.8	28.05	22.57	1.14	0.00892	0.101	1.24	0.00511	0.0962	0.8	0.0896	0.304	1.1	0.0127	0.0304	58231118	58238992	-	3	3802	TSS	AC003006.7	29752	intron	0.012714	0.488977	NM_024833, intron 1 of 3	Unchanged	Gain	Unchanged	Gain
IGHMBP2	chr11	68696180	68700310	ENSG00000132740	4131	*	5.36	6.41	6.1	7.14	5.02	37	44.86	75.76	94.13	53.41	83.67	164.2	117.36	32.06	32.77	1.05	0.00882	0.101	0.74	0.0908	0.32	1.78	4.65e-06	0.000955	0.85	0.0407	0.077	68671309	68708067	+	14	9822	TTS	RP11-757G1.5	10725	intron	0.025914	0.564891	NM_002180, intron 8 of 14	Unchanged	Unchanged	Gain	Unchanged
RAI1	chr17	17596653	17615938	ENSG00000108557	19286	*	8.87	9.7	9.3	9.82	7.15	384	549.06	780.31	884.69	530.92	730.18	1057.02	756.71	173.9	110.68	0.84	0.00892	0.101	0.43	0.219	0.477	0.96	0.00617	0.0731	1.9	6.44e-08	8.29e-07	17584786	17714767	+	5	21510	TSS	SMCR2	25294	intron	0.024476	0.564428	NM_030665, intron 1 of 5	Unchanged	Unchanged	Unchanged	Gain
CMIP	chr16	81476836	81484445	ENSG00000153815	7610	*	6	7.14	6.53	6.74	5.91	35	93.29	138.89	143.88	80.52	104.2	119.73	93.71	68.12	52.43	1.14	0.00879	0.101	0.53	0.267	0.524	0.73	0.111	0.34	0.69	0.0833	0.136	81478774	81745367	+	20	1866	TSS	RP11-391L3.5	28986	intron	0.041009	0.573137	NM_198390, intron 1 of 20	Unchanged	Unchanged	Unchanged	Unchanged
SMG7	chr1	183438950	183443712	ENSG00000116698	4763	*	6.99	8.03	7.76	7.97	5.03	74	180.17	256.74	267.09	190.53	242.34	259.12	241.73	36.06	29.13	1.04	0.00888	0.101	0.77	0.0693	0.282	0.98	0.0171	0.127	2.08	2.12e-06	1.83e-05	183441612	183523328	+	23	281	TSS	SMG7-AS1	450	promoter-TSS	0.044739	0.52121	NM_173156	Unchanged	Unchanged	Unchanged	Gain
GMEB1	chr1	29037335	29043188	ENSG00000162419	5854	*	6.81	7.65	7.78	7.76	5.18	105	119.64	200.34	201.28	214.44	225.76	235.18	197.06	28.85	43.69	0.84	0.00886	0.101	0.97	0.00354	0.0809	0.94	0.00461	0.0625	1.91	6.63e-07	6.61e-06	28995243	29045865	+	9	5604	TTS	YTHDF2	22870	intron	0.013841	0.47104	NM_024482, intron 9 of 9	Unchanged	Unchanged	Unchanged	Gain
RNF213	chr17	78244075	78248163	ENSG00000173821	4089	*	6.05	7.04	6.94	7.18	4.91	51	81.9	127.11	135.46	107.62	138.14	165.91	123.49	34.46	25.49	0.98	0.0089	0.101	0.89	0.0251	0.185	1.12	0.00387	0.0563	1.64	5.08e-05	0.000295	78234666	78372586	+	68	11453	TSS	SLC26A11	18820	intron	0.023978	0.546477	NM_001256071, intron 2 of 67	Unchanged	Unchanged	Gain	Gain
CSRNP1	chr3	39187459	39196552	ENSG00000144655	9094	*	8.64	9.54	8.63	8.45	6.13	288	509.89	730.64	757.65	334.82	460.21	383.98	313.54	77.73	62.62	0.9	0.00896	0.101	-0.01	0.984	0.993	-0.19	0.587	0.786	2.62	5.14e-13	2.21e-11	39183828	39196053	-	4	4048	TSS	TTC21A	11612	intron	0.029806	0.571758	NM_001320560, intron 1 of 4	Unchanged	Unchanged	Unchanged	Gain
MEX3C	chr18	48721285	48725617	ENSG00000176624	4333	*	6.94	7.78	7.12	6.88	4.95	110	136.02	211.28	229.59	111.61	165.77	146.24	89.33	38.47	23.3	0.84	0.00884	0.101	0.17	0.64	0.805	-0.06	0.863	0.938	2.13	8.19e-08	1.03e-06	48703190	48744674	-	1	20261	TTS	SRSF10P1	37698	exon	0.062572	0.585411	NM_016626, exon 1 of 2	Unchanged	Unchanged	Unchanged	Gain
MCMBP	chr10	121631308	121633597	ENSG00000197771	2290	*	6.14	7.09	7	6.44	4.25	62	79.05	116.16	156.89	117.19	138.14	85.52	88.46	24.84	13.11	0.95	0.00889	0.101	0.86	0.0206	0.171	0.3	0.429	0.674	2.03	6.45e-06	4.86e-05	121588971	121632266	-	15	186	TSS	SEC23IP	19770	promoter-TSS	0.08042	0.613805	NM_024834	Unchanged	Unchanged	Unchanged	Gain
SUB1	chr5	32585274	32587212	ENSG00000113387	1939	*	6.62	7.56	6.54	6.58	3.92	78	118.93	161.62	215.82	93.27	93.15	115.45	75.32	12.82	17.48	0.94	0.00881	0.101	-0.08	0.821	0.91	-0.05	0.897	0.955	2.83	1.83e-10	4.33e-09	32531738	32601429	+	5	15186	TTS	CTD-2004A9.1	60426	intron	0.056273	0.511352	NM_006713, intron 1 of 4	Unchanged	Unchanged	Unchanged	Gain
TMBIM6	chr12	50138304	50140534	ENSG00000139644	2231	*	5.5	6.54	5.88	5.6	3.22	37	53.41	99.33	87.24	52.61	65.52	50.46	46.42	12.02	6.55	1.05	0.0088	0.101	0.39	0.385	0.626	0.1	0.837	0.925	2.6	6.82e-07	6.77e-06	50101515	50146822	+	10	7403	TTS	LSM6P2	25323	intron	0.009421	0.422422	NM_001098576, intron 1 of 9	Unchanged	Unchanged	Unchanged	Gain
CTD-2126E3.3	chr19	50539604	50549860	ENSG00000269091	10257	*	7.07	7.9	7.27	8.07	5.78	120	148.84	247.48	230.36	125.95	182.35	284.78	253.99	54.49	55.34	0.83	0.00906	0.102	0.2	0.586	0.771	1	0.00222	0.0409	1.65	1.86e-06	1.63e-05	50546452	50554319	-	3	1720	TTS	ZNF473	11939	intron	0.013847	0.490932	NM_001308424, intron 2 of 3	Unchanged	Unchanged	Unchanged	Gain
B9D2	chr19	41861678	41868625	ENSG00000123810	6948	*	6.49	7.44	7.27	7.46	5.06	67	113.23	169.19	178.32	153.86	155.51	201.83	151.52	36.86	29.86	0.95	0.00914	0.102	0.78	0.0399	0.223	0.97	0.0108	0.0994	1.74	1.16e-05	8.11e-05	41860325	41870078	-	4	4826	TTS	TMEM91	8336	intron	0.015692	0.511156	NM_030578, intron 2 of 3	Unchanged	Unchanged	Unchanged	Gain
KMT2D	chr12	49442662	49456881	ENSG00000167548	14220	*	8.01	8.96	8.87	9.13	6.64	167	346.81	512.63	484.44	403.37	533.63	616.59	506.22	112.99	86.65	0.96	0.00908	0.102	0.87	0.0282	0.193	1.13	0.00331	0.0514	1.68	4.54e-06	3.57e-05	49412757	49449107	-	53	664	TSS	RHEBL1	8696	promoter-TSS	0.025812	0.549476	NM_003482	Unchanged	Unchanged	Gain	Gain
ZBED4	chr22	50277193	50281204	ENSG00000100426	4012	*	6.27	7.2	6.93	7.4	4.75	65	89.73	137.21	156.89	97.26	146.04	198.4	139.26	30.45	23.3	0.93	0.00903	0.102	0.65	0.0952	0.326	1.13	0.00247	0.0432	1.87	3.72e-06	3.01e-05	50247489	50283726	+	1	4528	TTS	ALG12	14678	exon	0.046135	0.541012	NM_014838, exon 2 of 2	Unchanged	Unchanged	Gain	Gain
RP11-287D1.3	chr2	74594538	74600124	ENSG00000264324	5587	*	5.47	6.61	6.45	7.34	5.64	34	54.83	70.71	124.74	78.92	96.31	197.55	126.99	56.9	42.96	1.14	0.00904	0.102	0.98	0.0206	0.171	1.87	4.38e-06	0.000919	0.45	0.253	0.328	74438730	74590504	-	38	6827	TSS	DCTN1	9048	non-coding	0.015756	0.532939	NR_033935, exon 9 of 27	Unchanged	Unchanged	Gain	Unchanged
RAP1GAP2	chr17	2928013	2932916	ENSG00000132359	4904	*	6.09	7.13	6.29	6.92	4.6	45	91.15	138.89	140.82	57.4	99.46	152.22	89.33	27.25	21.12	1.04	0.00912	0.102	0.2	0.669	0.823	0.83	0.0596	0.248	1.72	0.000101	0.000536	2680349	2937501	+	25	7036	TTS	OR1D5	35498	intron	0.026724	0.558434	NM_001100398, intron 21 of 23	Unchanged	Unchanged	Unchanged	Gain
SLC39A14	chr8	22273021	22279023	ENSG00000104635	6003	*	6.06	7.02	7.4	6.97	5.15	54	79.76	133	127.04	172.19	165.77	129.99	120.86	36.86	34.22	0.96	0.00912	0.102	1.34	0.000284	0.0244	0.91	0.016	0.123	1.41	0.000291	0.00132	22224799	22291642	+	8	15620	TTS	RNU6-336P	15881	intron	0.017164	0.476841	NM_001135154, intron 8 of 8	Unchanged	Gain	Unchanged	Gain
HKR1	chr19	37808243	37813244	ENSG00000181666	5002	*	5.5	6.65	6.43	6.07	4.35	28	62.67	111.11	89.54	104.43	67.89	58.15	76.2	16.83	24.03	1.15	0.00929	0.103	0.93	0.0492	0.243	0.57	0.235	0.497	1.45	0.00241	0.00781	37803738	37855347	+	8	7006	TSS	CTD-3220F14.2	17394	intron	0.025	0.467307	NM_001329766, intron 1 of 6	Unchanged	Unchanged	Unchanged	Gain
CACTIN	chr19	3608289	3613432	ENSG00000105298	5144	*	6.44	7.41	7.58	7.61	4.94	65	108.24	144.78	195.15	163.42	218.66	237.74	154.14	42.47	18.93	0.97	0.00926	0.103	1.14	0.00283	0.0723	1.18	0.00249	0.0433	1.78	5.73e-05	0.000328	3610638	3626813	-	11	222	TTS	CACTIN-AS1	3068	3' UTR	0.047841	0.63601	NM_021231, exon 11 of 11	Unchanged	Gain	Gain	Gain
WTIP	chr19	34984433	35001035	ENSG00000142279	16603	*	8.64	9.48	9.39	9.64	6.7	321	477.13	662.46	767.6	577.16	768.86	928.74	662.12	112.99	94.66	0.84	0.00922	0.103	0.75	0.0334	0.208	1	0.00474	0.0633	2.14	1.27e-10	3.1e-09	34972542	34997258	+	9	4524	TTS	RPS26P55	31597	3' UTR	0.024456	0.562161	NM_001080436, exon 8 of 8	Unchanged	Unchanged	Unchanged	Gain
HSPBP1	chr19	55788848	55792874	ENSG00000133265	4027	*	5.74	6.79	5.94	6.23	4.76	42	64.8	89.23	131.63	48.63	74.2	96.64	53.42	35.26	18.93	1.05	0.00929	0.103	0.2	0.66	0.817	0.49	0.274	0.537	1.25	0.00552	0.0155	55773598	55791728	-	8	867	TSS	BRSK1	2578	exon	0.032547	0.555638	NM_012267, exon 2 of 8	Unchanged	Unchanged	Unchanged	Gain
MAPK8	chr10	49513870	49515866	ENSG00000107643	1997	*	6.1	7.03	6.64	6.37	4.16	69	68.37	148.15	113.27	96.46	102.62	109.46	56.05	24.04	11.65	0.93	0.00924	0.103	0.54	0.146	0.398	0.27	0.52	0.744	2.1	4.16e-06	3.31e-05	49514732	49647403	+	11	136	TSS	RP11-542E6.3	13408	intron	0.083709	0.611222	NM_001278547, intron 1 of 11	Unchanged	Unchanged	Unchanged	Gain
AKIRIN1	chr1	39455882	39458166	ENSG00000174574	2285	*	5.25	6.35	4.93	5.72	4.02	29	47	77.44	85.71	21.52	39.47	48.75	56.93	12.82	19.66	1.1	0.00923	0.103	-0.32	0.535	0.735	0.48	0.31	0.573	1.5	0.00244	0.00791	39456894	39471731	+	4	130	TSS	RP11-781D11.1	32427	promoter-TSS	0.050372	0.568739	NM_024595	Unchanged	Unchanged	Unchanged	Gain
MIR4804	chr5	72143377	72145656	ENSG00000263593	2280	*	6.63	7.46	7.27	7.41	4.05	97	100.41	174.24	179.08	133.93	174.45	200.97	139.26	20.84	12.38	0.84	0.00965	0.104	0.64	0.067	0.278	0.79	0.0264	0.161	2.67	5.6e-10	1.19e-08	72174417	72174490	+	0	29900	TSS	TNPO1	32378	intron	0.053995	0.516455	NM_002270, intron 2 of 24	Unchanged	Unchanged	Unchanged	Gain
LINC01346	chr1	4035140	4043738	ENSG00000233304	8599	*	8.62	9.5	8.92	9.06	5.37	296	493.51	673.4	774.49	379.46	589.67	601.2	469.44	47.28	35.68	0.87	0.0096	0.104	0.3	0.438	0.665	0.44	0.219	0.479	3.34	2.84e-19	5.47e-17	4000676	4015322	+	2	24117	TTS	RP13-614K11.2	30399	Intergenic	0.021286	0.546755		Unchanged	Unchanged	Unchanged	Gain
SERPIND1	chr22	21149831	21153160	ENSG00000099937	3330	*	5.44	6.58	6.36	7.14	4.82	27	59.82	95.12	95.66	67.76	96.31	168.47	113.86	30.45	26.21	1.14	0.00962	0.104	0.92	0.0501	0.245	1.7	0.000104	0.0069	1.12	0.0104	0.0259	21128166	21142008	+	4	9488	TTS	PI4KA	61604	intron	0.013822	0.502553	NM_001362863, intron 16 of 53	Unchanged	Unchanged	Gain	Gain
CTD-3193O13.14	chr19	8032595	8038180	ENSG00000269813	5586	*	6.28	7.17	6.88	6.94	4.32	71	84.03	134.68	153.83	99.65	135.77	129.99	115.61	23.24	16.75	0.9	0.00953	0.104	0.6	0.108	0.346	0.66	0.0644	0.258	2.17	2.62e-07	2.88e-06	8024006	8024896	+	1	10492	TTS	ELAVL1	11926	intron	0.026325	0.553984	NM_001419, intron 4 of 5	Unchanged	Unchanged	Unchanged	Gain
MIR135A1	chr3	52317710	52334829	ENSG00000207926	17120	*	8.7	9.6	9.17	9.3	7.13	297	533.39	756.74	792.09	523.75	630.72	638.83	624.46	150.66	128.89	0.9	0.00952	0.104	0.48	0.201	0.458	0.61	0.0926	0.309	1.76	4.32e-07	4.51e-06	52328234	52328324	-	0	1964	TTS	GLYCTK	3002	intron	0.018519	0.553771	NR_026699, intron 4 of 4	Unchanged	Unchanged	Unchanged	Gain
RNU6-446P	chr17	60740608	60748587	ENSG00000199697	7980	*	7.45	8.44	8.34	8.48	6.79	111	237.85	303.87	388.78	268.65	380.48	407.93	308.29	129.82	91.02	0.99	0.00933	0.104	0.9	0.0269	0.19	1.04	0.00848	0.0869	1.08	0.00356	0.0108	60761265	60761371	+	0	16668	TSS	MRC2	26360	intron	0.0272	0.551824	NM_006039, intron 5 of 29	Unchanged	Unchanged	Gain	Gain
OGFR-AS1	chr20	61427446	61438600	ENSG00000229873	11155	*	8.02	8.99	8.92	9.2	6.89	167	350.37	444.45	571.68	407.36	558.89	655.08	522.86	137.04	99.76	0.97	0.00938	0.104	0.9	0.0238	0.181	1.19	0.00215	0.04	1.37	0.000237	0.00111	61431978	61436939	-	2	1045	TTS	MRGBP	1078	TTS	0.042769	0.603102	NM_018270	Unchanged	Unchanged	Gain	Gain
LINC00896	chr22	20189260	20203650	ENSG00000236499	14391	*	9.24	10.21	10.04	10.5	7.56	404	804	1085.86	1280.36	866.54	1240.13	1581.25	1319.86	208.36	168.94	0.97	0.00939	0.104	0.8	0.0484	0.241	1.26	0.00124	0.0292	1.86	3.31e-07	3.56e-06	20193919	20196047	+	0	408	TTS	XXbac-B444P24.8	4014	TTS	0.023212	0.614385	NR_026919	Unchanged	Unchanged	Gain	Gain
SLC9A3	chr5	470569	480943	ENSG00000066230	10375	*	7.38	8.35	8.43	8.73	6.62	119	214.35	252.53	401.02	290.97	398.64	469.5	377.48	106.58	89.57	0.97	0.0096	0.104	1.05	0.00562	0.0998	1.35	0.000234	0.0113	1.08	0.00219	0.00723	473424	524447	-	16	2332	TTS	CTD-2228K2.7	2406	exon	0.053408	0.641508	NM_001284351, exon 15 of 17	Unchanged	Gain	Gain	Gain
HSF2BP	chr21	45077300	45081476	ENSG00000160207	4177	*	6.52	7.56	7.69	7.64	5.2	61	122.49	147.31	231.12	181.76	231.29	206.1	191.8	40.87	32.77	1.04	0.00958	0.104	1.17	0.00332	0.0784	1.12	0.00414	0.0582	1.62	6.49e-05	0.000365	44949071	45079374	-	8	14	TSS	RRP1B	40	promoter-TSS	0.062036	0.568247	NM_007031	Unchanged	Gain	Gain	Gain
RP11-561C5.4	chr15	85737147	85753477	ENSG00000229212	16331	*	6.81	7.69	7.76	8.07	4.04	92	133.17	194.45	219.64	192.92	240.76	296.75	239.1	18.43	14.56	0.88	0.0095	0.104	0.95	0.00803	0.116	1.25	0.000324	0.0136	2.84	3.81e-11	1.06e-09	85747140	85777994	-	6	1828	TTS	CSPG4P12	5638	Intergenic	0.020577	0.593509		Unchanged	Unchanged	Gain	Gain
TAF4	chr20	60536365	60542321	ENSG00000130699	5957	*	4.66	6.03	7.06	5.84	5.71	12	38.46	69.02	61.22	98.85	168.93	45.33	69.19	61.71	42.96	1.37	0.00961	0.104	2.41	0.00411	0.0868	1.18	0.0342	0.185	0.06	0.874	0.897	60549853	60640866	-	14	10510	TTS	MIR1257	10625	Intergenic	0.030059	0.560611		Unchanged	Gain	Unchanged	Unchanged
PRKD2	chr19	47175431	47179913	ENSG00000105287	4483	*	6.07	7.14	6.43	7.38	4.49	41	93.29	148.99	133.93	60.59	112.09	194.13	139.26	20.84	24.03	1.08	0.00949	0.104	0.36	0.454	0.678	1.31	0.00203	0.0386	1.94	1.23e-05	8.48e-05	47177573	47220384	-	18	99	TTS	DACT3-AS1	3032	TTS	0.016737	0.508701	NM_001079881	Unchanged	Unchanged	Gain	Gain
ACVR1B	chr12	52384913	52389489	ENSG00000135503	4577	*	5.71	6.7	6.16	6.78	4.65	52	52.7	85.86	122.45	71.75	71.04	129.13	91.09	24.04	26.21	0.99	0.00957	0.104	0.45	0.26	0.518	1.07	0.00547	0.0681	1.56	0.00016	0.000792	52345450	52390862	+	9	3661	TTS	RNU6-574P	5654	intron	0.021202	0.503278	NM_004302, intron 8 of 8	Unchanged	Unchanged	Gain	Gain
KLF7	chr2	208010432	208014731	ENSG00000118263	4300	*	5.85	6.83	5.89	5.88	4.49	52	63.38	132.16	95.66	51.82	67.1	77.82	40.29	20.03	24.76	0.98	0.0096	0.104	0.04	0.924	0.962	0.03	0.945	0.976	1.72	5.01e-05	0.000292	207938860	208030669	-	4	18088	TSS	AC007879.1	25776	intron	0.00698	0.441731	NM_001270943, intron 1 of 3	Unchanged	Unchanged	Unchanged	Gain
GLI2	chr2	121522702	121530636	ENSG00000074047	7935	*	7.07	7.88	7.19	7.44	6.37	123	145.28	224.75	247.96	140.3	151.56	197.55	150.64	93.76	72.09	0.82	0.00966	0.104	0.12	0.725	0.855	0.38	0.273	0.536	1.07	0.00173	0.00595	121493198	121709339	+	13	33471	TSS	AC018866.1	58628	intron	0.0179	0.556214	NM_001371271, intron 1 of 13	Unchanged	Unchanged	Unchanged	Gain
SUZ12P	chr17	29030768	29039613	ENSG00000264538	8846	*	6.13	7.04	7.2	7.42	6.06	62	77.62	127.11	136.99	115.59	177.61	199.26	143.63	70.52	63.35	0.92	0.00937	0.104	1.07	0.00529	0.0977	1.3	0.000392	0.0153	0.45	0.213	0.286	29036316	29097052	+	8	1126	TSS	RN7SL316P	5398	Intergenic	0.049638	0.601357		Unchanged	Gain	Gain	Unchanged
IQGAP3	chr1	156515421	156521624	ENSG00000183856	6204	*	6.7	7.62	7.22	7.36	5.12	79	129.61	208.76	185.97	126.75	170.51	202.68	126.12	41.67	27.67	0.92	0.00953	0.104	0.51	0.186	0.442	0.66	0.0955	0.314	1.86	3.32e-06	2.73e-05	156495196	156542396	-	37	23326	TTS	TTC24	30996	exon	0.009352	0.51459	NM_178229, exon 17 of 38	Unchanged	Unchanged	Unchanged	Gain
LTBP3	chr11	65313048	65324767	ENSG00000168056	11720	*	7.21	8.23	7.73	7.83	6.33	98	197.97	228.96	369.64	176.18	249.45	267.67	186.55	92.16	69.18	1.02	0.00964	0.104	0.52	0.194	0.449	0.62	0.121	0.355	1.22	0.00114	0.0042	65306881	65326401	-	27	7494	TSS	SCYL1	12732	exon	0.030807	0.585118	NM_021070, exon 10 of 27	Unchanged	Unchanged	Unchanged	Gain
LTBP3	chr11	65325138	65329467	ENSG00000168056	4330	*	5.27	6.55	5.71	5.67	5.16	19	58.4	78.28	108.67	39.86	64.73	58.15	43.79	41.67	29.86	1.27	0.00955	0.104	0.43	0.439	0.667	0.4	0.473	0.709	0.65	0.148	0.214	65306881	65326401	-	27	902	TSS	SSSCA1-AS1	9828	Intergenic	0.039048	0.611689		Unchanged	Unchanged	Unchanged	Unchanged
GPT2	chr16	46947854	46957651	ENSG00000166123	9798	*	7.08	7.96	6.84	7.33	5.75	107	164.5	265.15	234.18	106.03	123.14	175.31	147.14	68.12	39.32	0.88	0.00935	0.104	-0.24	0.497	0.709	0.25	0.496	0.726	1.59	4.25e-05	0.000253	46918289	46965209	+	11	12456	TTS	DNAJA2	36546	intron	0.018171	0.519139	NM_001142466, intron 8 of 11	Unchanged	Unchanged	Unchanged	Gain
WDR5	chr9	137015737	137025103	ENSG00000196363	9367	*	6.61	7.52	7.51	7.57	5.88	84	111.81	156.57	209.69	161.03	202.87	228.34	150.64	67.32	50.24	0.9	0.00938	0.104	0.89	0.0122	0.135	0.95	0.00946	0.0923	1.09	0.00289	0.0091	137001209	137025090	+	13	4670	TTS	RNU6ATAC	9140	intron	0.033422	0.581038	NM_017588, intron 10 of 13	Unchanged	Unchanged	Unchanged	Gain
LRRFIP1	chr2	238598715	238602751	ENSG00000124831	4037	*	6.22	7.23	7.02	7.12	4.77	52	96.85	166.67	133.16	111.61	147.62	147.09	130.5	32.06	22.57	1.01	0.00951	0.104	0.8	0.0505	0.246	0.9	0.0231	0.15	1.58	0.000313	0.0014	238536218	238688958	+	23	64515	TSS	AC096574.5	65565	promoter-TSS	0.060223	0.59217	NM_001137551	Unchanged	Unchanged	Unchanged	Gain
CUEDC2	chr10	104180452	104185637	ENSG00000107874	5186	*	8.02	9.02	9.01	9.17	5.47	161	356.78	436.87	600	443.23	588.88	631.99	520.24	51.29	37.14	1	0.00961	0.104	1	0.0139	0.145	1.15	0.00338	0.052	2.71	1.72e-11	5.28e-10	104183001	104192418	-	8	44	TTS	FBXL15	152	TTS	0.040316	0.615236	NM_024326	Unchanged	Unchanged	Gain	Gain
SCRIB	chr8	144868822	144881768	ENSG00000180900	12947	*	8.78	9.62	9.57	10.03	7.65	369	507.75	680.98	890.05	591.51	927.53	1129.71	966.9	232.4	168.21	0.84	0.00932	0.104	0.79	0.0299	0.198	1.26	0.000169	0.00935	1.33	6.28e-05	0.000354	144873089	144897549	-	36	2206	TTS	RP11-429J17.8	2666	intron	0.035071	0.619342	NM_182706, intron 28 of 36	Unchanged	Unchanged	Gain	Gain
LARP1	chr5	154151683	154155566	ENSG00000155506	3884	*	6.02	7.06	6.54	7.02	4.76	44	86.17	134.68	131.63	97.26	88.41	156.5	103.35	33.66	20.39	1.03	0.00933	0.104	0.51	0.231	0.49	1	0.0184	0.133	1.51	0.000752	0.00296	154092461	154197167	+	18	43542	TTS	CTC-209L16.1	44370	intron	0.010304	0.463817	NM_001367719, intron 1 of 18	Unchanged	Unchanged	Unchanged	Gain
EIF3J	chr15	44855674	44863580	ENSG00000104131	7907	*	7.23	8.06	8.26	8.19	5.32	128	171.62	257.58	274.74	324.45	289.7	271.95	312.67	40.07	40.05	0.83	0.00955	0.104	1.04	0.00206	0.0623	0.96	0.00373	0.0551	2.1	7.14e-09	1.17e-07	44829254	44855001	+	7	4626	TTS	SPG11	4734	exon	0.011006	0.473564	NM_025137, exon 36 of 40	Unchanged	Gain	Unchanged	Gain
ANXA11	chr10	81932738	81940402	ENSG00000122359	7665	*	6.2	7.22	7	7.72	5.62	54	93.29	121.21	176.02	141.1	114.46	244.58	176.92	54.49	43.69	1.01	0.0096	0.104	0.8	0.0456	0.235	1.52	7.88e-05	0.00581	1.14	0.0026	0.00833	81910644	81965328	-	16	25926	TTS	LINC00857	30895	intron	0.012789	0.507698	NM_145868, intron 1 of 15	Unchanged	Unchanged	Gain	Gain
CANT1	chr17	76994646	77006763	ENSG00000171302	12118	*	7.53	8.5	7.56	7.88	6.73	116	252.81	356.06	368.88	175.38	202.87	269.39	202.31	129.82	83.01	0.97	0.00953	0.104	0.04	0.938	0.97	0.35	0.38	0.634	1.1	0.00435	0.0128	76987798	77005899	-	5	5194	TSS	C1QTNF1-AS1	14586	intron	0.024678	0.570686	NM_001159772, intron 1 of 5	Unchanged	Unchanged	Unchanged	Gain
RP11-613M10.9	chr9	38064172	38071767	ENSG00000255872	7596	*	6.77	7.85	7.98	7.8	6.34	59	158.81	210.44	252.55	209.66	295.23	239.45	205.82	93.76	68.45	1.09	0.00958	0.104	1.21	0.00582	0.102	1.03	0.0163	0.124	0.79	0.0479	0.0877	37588409	38068684	-	11	714	TSS	SHB	1238	exon	0.047406	0.579197	NM_003028, exon 1 of 6	Unchanged	Unchanged	Unchanged	Unchanged
DDX56	chr7	44601052	44614710	ENSG00000136271	13659	*	8.78	9.66	9.54	9.55	6.99	322	554.75	840.07	780.61	704.71	783.86	772.24	726.93	132.23	121.61	0.89	0.00952	0.104	0.76	0.0362	0.215	0.77	0.0295	0.171	2	4.79e-09	8.16e-08	44605403	44614650	-	13	2478	TTS	TMED4	9611	intron	0.019697	0.531337	NM_019082, intron 11 of 13	Unchanged	Unchanged	Unchanged	Gain
MDH2	chr7	75676771	75680790	ENSG00000146701	4020	*	6.03	7.03	6.25	6.48	4.22	52	79.05	152.36	109.44	77.33	74.99	101.77	76.2	18.43	18.93	1	0.00934	0.104	0.22	0.602	0.781	0.44	0.277	0.54	2.22	2.12e-07	2.4e-06	75677384	75696826	+	8	1396	TSS	STYXL1	1460	TTS	0.032354	0.529734	NR_104165	Unchanged	Unchanged	Unchanged	Gain
PPP4C	chr16	30091694	30101064	ENSG00000149923	9371	*	7.81	8.77	8.7	8.6	5.97	144	304.08	416.67	455.36	360.33	471.26	416.48	361.71	56.9	68.45	0.96	0.00948	0.104	0.89	0.0245	0.183	0.8	0.0388	0.198	2.03	1.13e-07	1.36e-06	30087310	30096698	+	8	319	TTS	TBX6	734	TTS	0.023588	0.562113	NM_004608	Unchanged	Unchanged	Unchanged	Gain
HNRNPA1P33	chr10	47125851	47132788	ENSG00000213412	6938	*	7.04	7.88	7.43	7.05	6.63	112	150.97	244.11	226.53	169.8	175.24	142.82	121.74	105.78	92.48	0.84	0.00983	0.105	0.39	0.259	0.517	0.01	0.989	0.995	1.08	0.00103	0.00385	47133337	47133898	-	0	4018	TTS	LINC00842	44698	intron	0.00966	0.505117	NR_033957, intron 1 of 3	Unchanged	Unchanged	Unchanged	Gain
TNK2-AS1	chr3	195616468	195626807	ENSG00000224614	10340	*	7.86	8.65	8.32	8.75	6.03	203	262.07	389.73	414.8	239.95	397.06	502.85	359.96	76.13	54.61	0.79	0.00992	0.105	0.45	0.212	0.47	0.89	0.00825	0.0856	2.05	2.98e-09	5.32e-08	195634946	195638128	+	1	13308	TSS	TNK2	14318	intron	0.030954	0.574233	NM_005781, intron 1 of 14	Unchanged	Unchanged	Unchanged	Gain
AP001877.1	chr11	95555011	95560447	ENSG00000256885	5437	*	5.24	6.33	6.29	6.05	4.23	38	37.74	98.49	62.76	88.49	67.89	64.99	67.44	13.62	24.03	1.09	0.0098	0.105	1.05	0.0121	0.135	0.81	0.0537	0.234	1.64	0.000449	0.00191	95556680	95557336	-	1	393	TSS	CEP57	8128	intron	0.006992	0.376564	NM_001363604, intron 9 of 11	Unchanged	Unchanged	Unchanged	Gain
GBGT1	chr9	136018110	136029927	ENSG00000148288	11818	*	8	8.89	8.49	8.73	6.41	183	327.58	449.5	498.98	288.58	430.22	470.36	376.6	103.38	66.99	0.89	0.00972	0.105	0.49	0.2	0.456	0.73	0.0453	0.213	1.8	1.34e-06	1.22e-05	136028339	136039332	-	6	4320	TTS	RALGDS	15282	intron	0.034953	0.588051	NM_001042368, intron 1 of 17	Unchanged	Unchanged	Unchanged	Gain
AC006262.6	chr19	46708499	46711805	ENSG00000268460	3307	*	4.82	5.99	5.22	5.44	4.28	26	30.62	52.19	75	39.86	34.73	55.59	31.53	19.23	19.66	1.17	0.00986	0.105	0.4	0.428	0.66	0.62	0.22	0.481	1.08	0.0231	0.0492	46706682	46715832	+	5	3470	TSS	AC006262.5	3861	Intergenic	0.011195	0.49879		Unchanged	Unchanged	Unchanged	Gain
KDM6B	chr17	7749541	7766484	ENSG00000132510	16944	*	8.44	9.29	9.05	9.52	6.07	266	428.71	617.85	635.2	475.12	583.36	826.97	641.1	81.74	52.43	0.85	0.00979	0.105	0.61	0.0883	0.315	1.08	0.00228	0.0414	2.53	5.56e-12	1.92e-10	7743221	7758114	+	22	102	TTS	TMEM88	370	promoter-TSS	0.03754	0.569557	NM_203411	Unchanged	Unchanged	Gain	Gain
RP11-977G19.14	chr12	56660162	56666961	ENSG00000258260	6800	*	6.42	7.41	7.45	7.54	5.18	57	113.94	169.19	171.43	188.93	161.03	163.34	208.44	37.66	34.95	0.99	0.00988	0.105	1.03	0.0097	0.123	1.12	0.00483	0.0639	1.6	6.83e-05	0.000381	56661576	56663888	-	1	326	TSS	COQ10A	1186	intron	0.022212	0.489043	NM_144576, intron 4 of 4	Unchanged	Unchanged	Gain	Gain
TRMT44	chr4	8470111	8472857	ENSG00000155275	2747	*	5.25	6.34	6.07	6.23	4.37	29	47	77.44	84.95	61.38	73.41	83.81	66.56	20.84	20.39	1.1	0.0097	0.105	0.83	0.0648	0.274	0.98	0.0247	0.155	1.25	0.00677	0.0183	8442549	8478253	+	10	6769	TTS	RP11-689P11.2	12512	intron	0.025137	0.546249	NM_001350233, intron 9 of 10	Unchanged	Unchanged	Unchanged	Gain
PRR12	chr19	50097289	50105383	ENSG00000126464	8095	*	7.46	8.43	8.23	8.48	6.03	119	234.29	291.25	397.19	251.91	348.91	427.6	287.27	68.12	62.62	0.96	0.00978	0.105	0.77	0.0508	0.246	1.02	0.00932	0.0915	1.66	8.84e-06	6.39e-05	50094899	50129696	+	13	6437	TSS	PRRG2	7064	intron	0.042506	0.619471	NM_020719, intron 4 of 13	Unchanged	Unchanged	Gain	Gain
ZNF362	chr1	33720849	33725475	ENSG00000160094	4627	*	6.55	7.57	7.56	7.27	5.08	59	128.18	174.24	205.1	165.02	211.56	180.45	128.75	32.86	34.95	1.02	0.00987	0.105	1.01	0.0143	0.146	0.72	0.0841	0.295	1.75	2.26e-05	0.000145	33722173	33766320	+	8	989	TSS	RP11-415J8.7	3650	intron	0.053405	0.60722	NM_152493, intron 1 of 8	Unchanged	Unchanged	Unchanged	Gain
STEAP3-AS1	chr2	119990102	119994998	ENSG00000229867	4897	*	5.36	6.42	6.15	5.53	5.49	33	49.14	80.81	90.31	66.17	75.78	47.04	45.54	48.08	41.51	1.06	0.00982	0.105	0.79	0.0676	0.279	0.17	0.719	0.865	0.61	0.121	0.182	120001997	120006647	-	1	9447	TTS	STEAP3	11167	intron	0.00858	0.517157	NM_182915, intron 2 of 5	Unchanged	Unchanged	Unchanged	Unchanged
ADAP1	chr7	974042	978884	ENSG00000105963	4843	*	4.92	6.15	6.53	7.15	5.71	20	40.59	58.92	82.65	72.54	112.09	160.78	122.61	59.3	45.15	1.22	0.00983	0.105	1.61	0.000607	0.0363	2.23	2.16e-07	0.000117	-0.13	0.771	0.809	937539	994333	-	10	17870	TSS	COX19	38049	intron	0.044825	0.621437	NM_001284308, intron 1 of 10	Unchanged	Gain	Gain	Unchanged
B9D2	chr19	41858548	41861372	ENSG00000123810	2825	*	5.86	6.9	6.65	6.76	4.84	41	74.77	104.38	133.93	86.89	114.46	114.6	101.59	29.65	27.67	1.04	0.00982	0.105	0.8	0.0592	0.263	0.9	0.0278	0.165	1.2	0.00552	0.0155	41860325	41870078	-	4	365	TTS	TMEM91	3145	promoter-TSS	0.060574	0.66466	NM_000660	Unchanged	Unchanged	Unchanged	Gain
ZC3H3	chr8	144578790	144585219	ENSG00000014164	6430	*	5.85	6.96	6.7	7.32	6.58	34	81.18	115.32	133.16	81.31	126.3	172.75	146.26	111.39	79.37	1.11	0.00981	0.105	0.85	0.0671	0.278	1.47	0.000564	0.0191	0.01	0.963	0.971	144519824	144623623	-	11	41618	TSS	RP11-661A12.5	42138	intron	0.028158	0.591849	NM_015117, intron 4 of 11	Unchanged	Unchanged	Gain	Unchanged
SPG7	chr16	89621501	89625480	ENSG00000197912	3980	*	5.04	6.21	5.89	6.35	4.41	23	42.73	64.82	83.42	59.79	58.41	82.95	79.7	28.05	14.56	1.17	0.00978	0.105	0.85	0.0748	0.292	1.31	0.00334	0.0517	1.24	0.00998	0.0251	89574810	89624174	+	16	684	TTS	RPL13	3574	exon	0.027903	0.536064	NM_003119, exon 17 of 17	Unchanged	Unchanged	Gain	Gain
MFSD12	chr19	3571331	3579117	ENSG00000161091	7787	*	7.91	8.82	8.3	8.8	5.46	172	307.64	386.37	519.64	273.43	357.59	478.05	413.39	54.49	33.5	0.92	0.00985	0.105	0.4	0.292	0.547	0.89	0.0132	0.11	2.54	1.42e-10	3.45e-09	3547288	3573849	-	10	1375	TSS	HMG20B	2289	intron	0.062685	0.636784	NM_006339, intron 4 of 9	Unchanged	Unchanged	Unchanged	Gain
ZYX	chr7	143075948	143081255	ENSG00000159840	5308	*	6.84	7.78	6.5	6.8	4.49	81	148.12	225.59	213.52	82.91	97.88	124.86	98.09	28.05	16.75	0.94	0.00969	0.105	-0.34	0.381	0.623	-0.04	0.906	0.958	2.42	4.63e-08	6.17e-07	143078172	143088204	+	9	430	TSS	AC093673.5	1014	promoter-TSS	0.044101	0.589976	NR_161353	Unchanged	Unchanged	Unchanged	Gain
TMEM41B	chr11	9335195	9337348	ENSG00000166471	2154	*	4.99	6.08	4.13	4.37	3.57	33	30.62	69.87	65.82	19.13	15.79	30.79	10.51	12.82	10.92	1.09	0.00975	0.105	-0.87	0.124	1	-0.62	0.304	0.567	1.68	0.00136	0.00487	9302217	9336327	-	7	56	TSS	RP11-682B13.2	3036	promoter-TSS	0.052974	0.524849	NM_015012	Unchanged	Unchanged	Unchanged	Gain
DCTN4	chr5	150136979	150140081	ENSG00000132912	3103	*	5.08	6.21	5.91	5.85	4.26	28	39.88	83.33	64.29	68.56	52.1	53.02	62.18	20.84	17.48	1.12	0.00972	0.105	0.83	0.0693	0.282	0.76	0.093	0.31	1.16	0.0143	0.0336	150088001	150138671	-	13	141	TSS	SMIM3	18977	promoter-TSS	0.027411	0.453256	NM_001135644	Unchanged	Unchanged	Unchanged	Gain
NOSIP	chr19	50053403	50062015	ENSG00000142546	8613	*	7.48	8.31	8.42	8.8	5.7	150	207.23	289.56	346.68	273.43	412.85	498.58	393.24	63.31	40.78	0.83	0.00975	0.105	0.94	0.00871	0.119	1.32	8.59e-05	0.0062	1.95	1.47e-07	1.73e-06	50059805	50093519	-	9	2096	TTS	RCN3	7490	Intergenic	0.034955	0.549001		Unchanged	Unchanged	Gain	Gain
USO1	chr4	76649236	76652067	ENSG00000138768	2832	*	5.71	6.81	6.64	6.11	3.58	33	71.93	112.8	110.97	86.89	112.09	72.69	65.69	14.42	9.47	1.09	0.00981	0.105	0.92	0.0381	0.219	0.4	0.391	0.643	2.43	1.68e-06	1.49e-05	76650003	76734448	+	24	648	TSS	G3BP2	942	intron	0.043463	0.510067	NM_003715, intron 1 of 21	Unchanged	Unchanged	Unchanged	Gain
[truncated: 49,484 more rows]
[truncated: 39 more columns]
